# Supplementary material for: Functional divergence of the gut microbiome associated with lifestyle and helminth infection in Indigenous Peninsular Malaysian
Source: Research Square preprint supplement (doi:10.21203/rs.3.rs-7706316/v1), 2026-01-23
Supplement: Supplementary file 1 [file 3392a6d1be9e8c02ff4957e7.xlsx]

## Sheet: Table 1
Supplementary Table 1: Quality metrics and chimerism of 15,867 Malaysian MAGs
	MAGs	Completeness	Contamination	5S_rRNA	LSU_rRNA_bacteria	LSU_rRNA_archaea	SSU_rRNA_bacteria	SSU_rRNA_archaea	tRNA	MAGs.quality.bac
1	KR042B_Pre_refinedBins_bin.88	69.22	9.99	1	0	0	0	0	6	MQ
2	BK057A_Post1_refinedBins_bin.56	58.28	9.98	0	0	0	1	0	17	MQ
3	JQ19B_Post1_refinedBins_bin.54	80.65	9.98	0	0	0	0	0	16	MQ
4	LL66C_Pre_refinedBins_bin.82	70.31	9.98	1	0	0	2	0	16	MQ
5	BK16E_Pre_refinedBins_bin.78	82.98	9.94	0	0	0	2	0	16	MQ
6	UC22_Pre_refinedBins_bin.77	51.72	9.92	2	0	0	0	0	16	MQ
7	SJ045E_Post1_refinedBins_bin.20	69.49	9.9	0	0	0	2	0	20	MQ
8	KR069B_Pre_refinedBins_bin.4	75.62	9.89	3	0	0	1	0	21	MQ
9	SJ045A_Pre_refinedBins_bin.12	72.7	9.88	1	0	0	3	2	11	MQ
10	UC06_Pre_refinedBins_bin.144	52.53	9.87	0	0	1	0	0	8	MQ
11	LL57A_Pre_refinedBins_bin.28	80.49	9.86	0	0	0	2	0	24	MQ
12	SJ058B_Post1_refinedBins_bin.47	51.08	9.86	0	0	1	0	0	17	MQ
13	UC65_Pre_refinedBins_bin.15	70.17	9.827	1	0	0	0	0	16	MQ
14	SJ045C_Pre_refinedBins_bin.19	66.44	9.824	0	0	0	0	0	15	MQ
15	LL5A_Pre_refinedBins_bin.57	54.96	9.811	0	0	0	1	0	16	MQ
16	KR042B_Pre_refinedBins_bin.60	83.35	9.78	1	0	0	0	0	16	MQ
17	SJ032D_Post2_refinedBins_bin.76	58.36	9.78	2	0	0	0	0	17	MQ
18	SJ024A_Post1_refinedBins_bin.37	75.34	9.76	1	0	0	0	0	19	MQ
19	SJ058E_Post1_refinedBins_bin.65	69.3	9.738	0	1	0	2	0	13	MQ
20	JL6C_Pre_refinedBins_bin.1	65.47	9.72	1	0	0	0	0	19	MQ
21	SJ004C_Pre_refinedBins_bin.29	73.14	9.71	0	0	0	1	0	13	MQ
22	SJ024A_Pre_refinedBins_bin.39	53.89	9.71	2	0	0	0	0	19	MQ
23	BK052A_Post2_refinedBins_bin.17	60.44	9.7	0	0	0	0	0	18	MQ
24	SJ018B_Post2_refinedBins_bin.70	54.48	9.69	0	0	0	0	0	11	MQ
25	SJ045D_Pre_refinedBins_bin.26	55.13	9.68	0	0	0	2	0	16	MQ
26	SJ091B_Post2_refinedBins_bin.67	68.89	9.68	0	0	1	1	0	16	MQ
27	SJ091D_Post2_refinedBins_bin.67	64.03	9.68	3	0	0	0	0	20	MQ
28	LL64D_Pre_refinedBins_bin.11	96.23	9.677	1	0	1	0	0	24	MQ
29	LL5D_Pre_refinedBins_bin.25	66.41	9.67	3	0	0	0	0	20	MQ
30	SJ086A_Pre_refinedBins_bin.52	84.78	9.67	0	0	0	0	0	18	MQ
31	KR004F_Post1_refinedBins_bin.58	72.96	9.649	0	0	0	0	0	10	MQ
32	KR063C_Pre_refinedBins_bin.62	50	9.649	2	0	0	0	1	10	MQ
33	JC6B_Post2_refinedBins_bin.87	73.27	9.61	1	0	1	0	0	15	MQ
34	LL9C_Pre_refinedBins_bin.69	81.75	9.6	1	2	0	0	0	16	MQ
35	LL4B_Pre_refinedBins_bin.72	67.44	9.59	0	0	1	0	0	12	MQ
36	SJ095A_Pre_refinedBins_bin.38	82.76	9.59	0	0	0	0	0	22	MQ
37	UC08_Pre_refinedBins_bin.92	99.28	9.59	1	1	1	1	0	23	MQ
38	LL31F_Pre_refinedBins_bin.52	85.75	9.58	0	0	1	0	0	16	MQ
39	SJ024B_Pre_refinedBins_bin.65	52.04	9.57	1	0	0	0	0	7	MQ
40	UC23_Pre_refinedBins_bin.20	86.91	9.57	0	0	0	0	0	23	MQ
41	BK5A_Post1_refinedBins_bin.40	75.89	9.56	0	0	0	0	0	17	MQ
42	BK102A_Pre_refinedBins_bin.48	61.6	9.53	0	0	0	0	0	15	MQ
43	UC08_Pre_refinedBins_bin.26	78.79	9.52	2	0	0	0	0	21	MQ
44	SJ025B_Pre_refinedBins_bin.74	51.98	9.493	1	0	0	0	0	19	MQ
45	LL41B_Pre_refinedBins_bin.26	50.5	9.482	0	0	0	1	0	8	MQ
46	BK105A_Post1_refinedBins_bin.49	65.03	9.46	1	0	1	0	0	13	MQ
47	SJ045A_Post2_refinedBins_bin.18	73.82	9.44	1	0	0	0	0	12	MQ
48	UC53_Pre_refinedBins_bin.40	53.08	9.44	0	1	0	0	0	18	MQ
49	SJ003C_Post1_refinedBins_bin.61	72.81	9.42	2	0	0	0	0	19	MQ
50	SJ058D_Pre_refinedBins_bin.71	95.69	9.42	0	0	0	1	0	18	MQ
51	UC53_Pre_refinedBins_bin.65	59.56	9.42	1	0	0	0	0	20	MQ
52	JL23A_Pre_refinedBins_bin.40	56.12	9.41	0	0	0	0	0	10	MQ
53	SJ088A_Pre_refinedBins_bin.59	71.69	9.41	1	0	0	2	0	11	MQ
54	LL24A_Pre_refinedBins_bin.61	56.85	9.37	0	0	0	0	0	17	MQ
55	BK10A_Pre_refinedBins_bin.34	58.3	9.36	0	1	0	0	0	9	MQ
56	SJ031C_Post2_refinedBins_bin.44	54.26	9.34	2	0	0	1	0	14	MQ
57	BK54B_Pre_refinedBins_bin.38	50.01	9.33	0	0	0	0	0	17	MQ
58	KR067E_Post1_refinedBins_bin.43	57.84	9.33	0	0	0	0	0	13	MQ
59	KR067G_Post2_refinedBins_bin.104	56.48	9.32	0	0	0	0	0	12	MQ
60	UC48_Pre_refinedBins_bin.117	87.39	9.27	2	0	0	1	0	21	MQ
61	UC51_Pre_refinedBins_bin.9	77.19	9.25	0	1	1	1	0	11	MQ
62	SJ058E_Post2_refinedBins_bin.46	50.93	9.24	0	0	0	0	0	12	MQ
63	LL61D_Pre_refinedBins_bin.27	93.98	9.23	3	0	0	0	0	22	MQ
64	JL19A_Pre_refinedBins_bin.25	92.31	9.22	0	1	1	0	0	6	MQ
65	SJ018B_Post1_refinedBins_bin.34	93.15	9.21	0	0	0	0	0	24	MQ
66	SJ032D_Post2_refinedBins_bin.43	77.25	9.21	0	0	1	0	0	16	MQ
67	KR048C_Pre_refinedBins_bin.53	72.29	9.2	0	0	0	0	0	10	MQ
68	LL25D_Pre_refinedBins_bin.12	53.15	9.18	1	0	0	0	0	14	MQ
69	BK63A_Pre_refinedBins_bin.24	81.58	9.17	3	1	0	0	0	22	MQ
70	LL61A_Pre_refinedBins_bin.53	55.47	9.161	2	0	0	0	1	19	MQ
71	KR059B_Pre_refinedBins_bin.50	100	9.16	1	0	0	0	0	24	MQ
72	LL25C_Pre_refinedBins_bin.5	50.23	9.15	1	0	0	1	0	10	MQ
73	LL7B_Pre_refinedBins_bin.1	55.14	9.14	0	0	1	0	0	13	MQ
74	LL8E_Pre_refinedBins_bin.50	51.38	9.122	1	0	0	0	0	8	MQ
75	JJ3E_Pre_refinedBins_bin.12	55.72	9.07	1	0	0	0	0	12	MQ
76	SJ092B_Pre_refinedBins_bin.1	67.7	9.07	0	0	0	0	0	7	MQ
77	BK6A_Pre_refinedBins_bin.68	75.92	9.04	1	0	0	1	0	17	MQ
78	SJ091C_Post1_refinedBins_bin.1	74.27	9.01	0	0	0	1	0	12	MQ
79	LL54D_Pre_refinedBins_bin.71	50.21	8.97	1	0	0	1	0	13	MQ
80	SJ082A_Pre_refinedBins_bin.5	87.48	8.95	2	2	2	1	0	21	MQ
81	SJ087A_Pre_refinedBins_bin.32	76.48	8.95	0	0	0	0	0	16	MQ
82	LL5D_Pre_refinedBins_bin.40	59.1	8.94	2	0	1	1	0	16	MQ
83	UC16_Pre_refinedBins_bin.21	89.68	8.94	0	1	1	0	0	22	MQ
84	KR060B_Pre_refinedBins_bin.7	51.08	8.931	1	0	1	0	0	7	MQ
85	BK62A_Pre_refinedBins_bin.58	86.2	8.93	0	0	0	0	0	16	MQ
86	SJ067E_Post1_refinedBins_bin.17	59.45	8.93	0	0	1	0	0	21	MQ
87	UC25_Pre_refinedBins_bin.9	50	8.928	0	0	0	0	0	15	MQ
88	SJ058C_Post1_refinedBins_bin.21	51.93	8.92	0	1	1	0	0	9	MQ
89	JJ5A_Pre_refinedBins_bin.72	75.53	8.91	3	1	1	0	0	20	MQ
90	KR004F_Post1_refinedBins_bin.2	61.04	8.89	1	0	0	1	0	14	MQ
91	UC26_Pre_refinedBins_bin.53	80.43	8.89	0	0	0	0	0	20	MQ
92	LL4B_Pre_refinedBins_bin.38	97.05	8.87	1	0	0	0	0	24	MQ
93	BK29B_Pre_refinedBins_bin.61	84.93	8.86	1	1	0	0	0	14	MQ
94	JC3B_Pre_refinedBins_bin.78	70.13	8.86	0	1	0	0	0	14	MQ
95	SJ076A_Pre_refinedBins_bin.74	62.59	8.85	0	0	0	0	0	11	MQ
96	BK18A_Pre_refinedBins_bin.59	64.22	8.8	0	0	0	0	0	15	MQ
97	SJ043B_Post1_refinedBins_bin.63	57.36	8.8	0	0	0	1	1	7	MQ
98	SJ025D_Pre_refinedBins_bin.27	91.77	8.79	1	0	0	4	0	23	MQ
99	SJ067A_Post2_refinedBins_bin.32	73.4	8.777	1	0	1	0	0	18	MQ
100	BK18A_Pre_refinedBins_bin.69	58.77	8.771	2	1	1	0	0	13	MQ
101	JQ12B_Post1_refinedBins_bin.19	54.38	8.771	0	0	1	0	0	12	MQ
102	JQ19C_Pre_refinedBins_bin.37	52.63	8.771	0	1	0	0	0	9	MQ
103	KR005C_Pre_refinedBins_bin.126	54.29	8.771	0	0	0	0	0	11	MQ
104	KR005C_Pre_refinedBins_bin.82	62.45	8.771	0	0	0	1	0	11	MQ
105	SJ011B_Post1_refinedBins_bin.96	51.75	8.771	0	0	0	2	1	10	MQ
106	SJ023C_Post1_refinedBins_bin.13	51.03	8.771	0	0	0	0	0	5	MQ
107	SJ091A_Post1_refinedBins_bin.17	66.97	8.77	0	0	0	0	0	15	MQ
108	LL14A_Pre_refinedBins_bin.61	61.06	8.75	1	0	0	0	0	15	MQ
109	SJ023C_Post2_refinedBins_bin.60	83.43	8.74	0	0	2	0	0	11	MQ
110	JK14C_Pre_refinedBins_bin.56	77.06	8.73	1	0	1	0	0	19	MQ
111	KR067F_Pre_refinedBins_bin.2	61.61	8.73	0	0	0	0	0	15	MQ
112	SJ076C_Pre_refinedBins_bin.52	73.93	8.71	0	0	0	0	0	16	MQ
113	SJ091C_Post1_refinedBins_bin.16	58.8	8.71	0	0	0	1	0	14	MQ
114	BK54B_Post1_refinedBins_bin.41	60.72	8.7	1	0	0	1	0	12	MQ
115	LL51C_Pre_refinedBins_bin.77	53.3	8.699	1	0	0	1	0	6	MQ
116	LL5D_Pre_refinedBins_bin.87	62.28	8.68	1	0	0	1	0	19	MQ
117	SJ016E_Pre_refinedBins_bin.84	74.58	8.67	0	0	1	0	0	17	MQ
118	SJ030B_Pre_refinedBins_bin.14	85.57	8.67	0	0	0	0	0	23	MQ
119	KR050D_Pre_refinedBins_bin.49	50.8	8.65	0	1	0	0	0	11	MQ
120	JQ3B_Post1_refinedBins_bin.43	53.24	8.64	4	0	0	0	0	19	MQ
121	LL13A_Pre_refinedBins_bin.81	79.4	8.64	1	1	2	0	0	18	MQ
122	LL22B_Pre_refinedBins_bin.37	84.58	8.64	0	1	0	0	0	20	MQ
123	JC23E_Post1_refinedBins_bin.11	50.15	8.62	1	0	1	0	0	12	MQ
124	KR056A_Post1_refinedBins_bin.1	66.03	8.62	4	1	0	0	0	16	MQ
125	SJ045D_Pre_refinedBins_bin.31	53.44	8.62	1	1	0	0	0	14	MQ
126	BK62A_Pre_refinedBins_bin.31	78.2	8.61	0	0	1	0	0	15	MQ
127	LL1B_Pre_refinedBins_bin.5	90.84	8.61	0	0	1	0	0	12	MQ
128	SJ092B_Post1_refinedBins_bin.5	83.16	8.61	0	0	0	0	0	10	MQ
129	JL19B_Post2_refinedBins_bin.47	69.38	8.603	1	0	0	0	0	12	MQ
130	SJ024B_Pre_refinedBins_bin.42	54.22	8.59	1	0	0	0	0	8	MQ
131	SJ025C_Post2_refinedBins_bin.47	76.92	8.59	2	1	0	0	0	20	MQ
132	SJ058F_Post2_refinedBins_bin.2	85.83	8.58	0	0	0	1	0	22	MQ
133	BK052A_pre_refinedBins_bin.40	100	8.56	0	0	0	0	0	17	MQ
134	SJ010C_Pre_refinedBins_bin.45	55.56	8.56	0	0	0	0	0	14	MQ
135	SJ024B_Post2_refinedBins_bin.38	64.64	8.55	0	0	0	1	0	19	MQ
136	SJ096C_Pre_refinedBins_bin.26	57.1	8.55	0	0	0	0	0	10	MQ
137	SJ088B_Post2_refinedBins_bin.6	53.65	8.544	0	0	0	0	0	9	MQ
138	JK1A_Pre_refinedBins_bin.38	83.06	8.54	2	0	0	0	0	19	MQ
139	LL66B_Pre_refinedBins_bin.12	67.03	8.532	0	0	0	0	0	15	MQ
140	JQ4E_Pre_refinedBins_bin.56	54.37	8.53	1	0	0	1	1	8	MQ
141	KR060B_Pre_refinedBins_bin.1	66.7	8.53	1	1	0	0	0	13	MQ
142	BK54B_Post2_refinedBins_bin.72	87.72	8.52	1	0	0	1	0	21	MQ
143	SJ082C_Pre_refinedBins_bin.32	79.27	8.52	0	0	0	0	0	11	MQ
144	KR107D_Pre_refinedBins_bin.13	73.54	8.51	0	0	0	0	0	13	MQ
145	LL31B_Pre_refinedBins_bin.45	74.68	8.51	0	1	0	1	0	19	MQ
146	LL51C_Pre_refinedBins_bin.73	57.37	8.51	1	0	0	0	0	15	MQ
147	LL61B_Pre_refinedBins_bin.69	59.91	8.49	0	0	0	0	0	13	MQ
148	KR050D_Pre_refinedBins_bin.29	68.28	8.48	0	0	0	0	0	8	MQ
149	UC32_Pre_refinedBins_bin.31	85.09	8.48	0	0	0	0	0	24	MQ
150	SJ047A_Post2_refinedBins_bin.28	100	8.47	1	0	0	0	0	20	MQ
151	BK18A_Pre_refinedBins_bin.22	80.97	8.46	2	0	1	0	0	23	MQ
152	SJ003D_Post2_refinedBins_bin.84	86.83	8.45	1	0	0	0	0	19	MQ
153	SJ021B_Pre_refinedBins_bin.6	50.01	8.45	1	0	0	0	0	5	MQ
154	KR091A_Pre_refinedBins_bin.62	72.37	8.44	2	0	0	0	0	19	MQ
155	LL9C_Pre_refinedBins_bin.23	68.84	8.44	1	0	0	0	0	9	MQ
156	SJ016B_Post1_refinedBins_bin.19	61.6	8.42	0	0	0	0	0	15	MQ
157	LL25D_Pre_refinedBins_bin.23	75.07	8.4	0	0	0	0	0	17	MQ
158	SJ032D_Post2_refinedBins_bin.6	81.52	8.4	0	1	0	1	0	21	MQ
159	JC23C_Post1_refinedBins_bin.98	67.18	8.38	1	0	0	0	0	15	MQ
160	KR082B_Pre_refinedBins_bin.22	96.92	8.37	3	0	1	0	0	21	MQ
161	UC06_Pre_refinedBins_bin.104	100	8.37	0	0	0	1	0	16	MQ
162	UC30_Pre_refinedBins_bin.34	90	8.369	2	2	2	3	1	22	MQ
163	KR032A_Pre_refinedBins_bin.71	58	8.36	0	0	0	0	0	9	MQ
164	LL25A_Pre_refinedBins_bin.60	78.36	8.349	0	0	0	0	0	21	MQ
165	SJ011B_Pre_refinedBins_bin.23	90.54	8.34	1	0	0	0	0	14	MQ
166	JQ4B_Post2_refinedBins_bin.10	51.77	8.33	0	0	1	0	0	9	MQ
167	LL31A_Pre_refinedBins_bin.61	54.31	8.33	0	0	1	0	0	16	MQ
168	BK60A_Post1_refinedBins_bin.35	64.31	8.326	1	0	0	0	0	11	MQ
169	KR082B_Pre_refinedBins_bin.53	74.59	8.32	0	0	0	0	0	12	MQ
170	UC12_Pre_refinedBins_bin.51	71.94	8.32	0	1	1	0	0	9	MQ
171	KR030D_Pre_refinedBins_bin.41	82.66	8.31	2	0	0	0	0	22	MQ
172	SJ032D_Post2_refinedBins_bin.45	86.64	8.29	1	0	0	1	0	23	MQ
173	LL51C_Pre_refinedBins_bin.33	82.78	8.27	1	0	0	0	0	17	MQ
174	SJ092B_Pre_refinedBins_bin.8	65.43	8.27	0	0	0	0	0	12	MQ
175	SJ058B_Pre_refinedBins_bin.56	95.48	8.25	1	0	0	0	0	23	MQ
176	BK5A_Pre_refinedBins_bin.66	84.39	8.24	0	0	0	0	0	20	MQ
177	KR026A_Pre_refinedBins_bin.34	58.08	8.22	0	0	0	0	1	14	MQ
178	JQ4E_Pre_refinedBins_bin.47	68.38	8.21	1	0	0	1	0	14	MQ
179	JL6C_Pre_refinedBins_bin.45	61.71	8.18	2	0	0	0	0	16	MQ
180	LL4B_Pre_refinedBins_bin.50	92.65	8.17	1	1	1	0	0	18	MQ
181	SJ032D_Post1_refinedBins_bin.71	66.3	8.16	1	0	0	0	0	13	MQ
182	LL9A_Pre_refinedBins_bin.29	64.63	8.13	0	0	0	1	0	11	MQ
183	SJ003A_Post1_refinedBins_bin.20	61.46	8.13	2	0	0	1	0	14	MQ
184	KR048C_Post1_refinedBins_bin.25	82.41	8.11	2	0	0	1	1	9	MQ
185	SJ024A_Post2_refinedBins_bin.46	78.4	8.11	2	0	0	1	0	9	MQ
186	BK63A_Post1_refinedBins_bin.32	96.73	8.1	1	0	0	1	0	24	MQ
187	LL64D_Pre_refinedBins_bin.17	90.46	8.07	0	0	0	0	0	23	MQ
188	JQ4A_Post1_refinedBins_bin.10	69.75	8.05	1	0	0	2	0	17	MQ
189	JK11D_Pre_refinedBins_bin.22	54.46	8.035	1	0	0	0	0	16	MQ
190	KR067E_Post1_refinedBins_bin.58	62.08	8.035	0	0	0	1	0	18	MQ
191	JJ7A_Pre_refinedBins_bin.16	81.23	8.02	0	1	1	0	0	13	MQ
192	JQ12A_Pre_refinedBins_bin.55	60.73	8.02	1	0	0	0	0	11	MQ
193	JQ3B_Post1_refinedBins_bin.11	82.02	8.01	1	0	0	1	1	15	MQ
194	LL47A_Pre_refinedBins_bin.84	75.47	8.01	0	0	0	0	0	15	MQ
195	UC69_Pre_refinedBins_bin.69	80	8	2	0	1	0	0	23	MQ
196	BK60A_Post1_refinedBins_bin.11	57.49	7.98	0	0	0	0	0	21	MQ
197	SJ031D_Post2_refinedBins_bin.69	50.25	7.98	0	0	0	0	0	9	MQ
198	SJ021A_Post1_refinedBins_bin.9	78.72	7.97	1	0	0	0	0	16	MQ
199	LL22A_Pre_refinedBins_bin.60	83.1	7.96	0	0	0	1	0	18	MQ
200	LL31B_Pre_refinedBins_bin.17	87.76	7.96	1	0	0	0	0	14	MQ
201	LL51E_Pre_refinedBins_bin.68	64.59	7.96	0	0	0	0	0	14	MQ
202	SJ092A_Pre_refinedBins_bin.6	87.15	7.96	0	0	0	0	0	21	MQ
203	SJ030B_Pre_refinedBins_bin.3	66.52	7.94	0	1	0	0	0	16	MQ
204	BK054C_Post1_refinedBins_bin.16	73.62	7.93	0	0	0	0	0	16	MQ
205	SJ069B_Post2_refinedBins_bin.46	71.69	7.924	0	0	0	0	0	19	MQ
206	KR032A_Post1_refinedBins_bin.77	70.26	7.92	0	0	0	0	0	15	MQ
207	SJ036A_Pre_refinedBins_bin.11	81.95	7.91	3	0	1	0	0	23	MQ
208	KR004B_Pre_refinedBins_bin.37	80.98	7.89	0	0	0	1	0	16	MQ
209	SJ078B_Post1_refinedBins_bin.7	82.25	7.89	0	0	0	1	0	23	MQ
210	SJ096B_Pre_refinedBins_bin.42	77.5	7.88	0	0	0	0	0	18	MQ
211	LL66B_Pre_refinedBins_bin.108	62.64	7.862	0	0	0	1	0	12	MQ
212	SJ036A_Pre_refinedBins_bin.51	83.35	7.86	0	1	0	0	0	14	MQ
213	BK21A_Post1_refinedBins_bin.53	70.9	7.85	1	0	0	2	1	19	MQ
214	JQ3B_Post1_refinedBins_bin.37	55.11	7.85	0	0	0	0	0	10	MQ
215	SJ025B_Post1_refinedBins_bin.51	88.46	7.85	0	0	0	0	0	24	MQ
216	KR032A_Post1_refinedBins_bin.78	98.92	7.84	0	0	0	0	0	21	MQ
217	SJ017A_Post1_refinedBins_bin.33	57.8	7.84	0	0	0	0	0	11	MQ
218	LL62B_Pre_refinedBins_bin.66	95.12	7.834	2	0	1	0	0	23	MQ
219	SJ011B_Post2_refinedBins_bin.18	91.92	7.83	0	0	0	0	0	24	MQ
220	SJ032B_Post1_refinedBins_bin.66	94.19	7.83	0	0	0	0	0	12	MQ
221	LL41B_Pre_refinedBins_bin.1	72.46	7.81	0	1	0	0	0	14	MQ
222	LL73D_Pre_refinedBins_bin.17	60.02	7.81	1	0	0	0	0	15	MQ
223	SJ040A_Pre_refinedBins_bin.6	70.52	7.8	0	0	0	1	0	7	MQ
224	SJ088A_Post1_refinedBins_bin.33	68.89	7.8	1	0	0	0	0	10	MQ
225	JT4B_Pre_refinedBins_bin.55	87.28	7.795	0	0	0	0	0	21	MQ
226	BK7A_Pre_refinedBins_bin.22	80.76	7.79	0	0	0	0	0	18	MQ
227	KR067B_Pre_refinedBins_bin.60	83.35	7.78	1	0	0	0	0	9	MQ
228	LL32A_Pre_refinedBins_bin.33	64.07	7.75	3	0	0	0	0	13	MQ
229	KR004B_Post2_refinedBins_bin.38	59.56	7.74	0	0	0	0	0	12	MQ
230	JH18B_Pre_refinedBins_bin.48	92.06	7.738	2	0	0	0	0	22	MQ
231	SJ012A_Pre_refinedBins_bin.35	56.26	7.73	2	0	0	0	0	17	MQ
232	LL8D_Pre_refinedBins_bin.56	93.42	7.72	0	1	0	1	0	16	MQ
233	SJ016B_Pre_refinedBins_bin.42	75.08	7.72	0	0	0	0	0	19	MQ
234	JC23C_Post1_refinedBins_bin.5	67.97	7.71	0	0	1	1	0	8	MQ
235	LL53C_Pre_refinedBins_bin.12	87.98	7.7	4	1	0	0	0	22	MQ
236	SJ092B_Post1_refinedBins_bin.46	53.95	7.7	1	0	0	0	0	14	MQ
237	LL11B_Pre_refinedBins_bin.69	85.93	7.69	4	0	0	1	0	22	MQ
238	LL31B_Pre_refinedBins_bin.40	77.14	7.69	0	1	1	0	0	15	MQ
239	SJ032A_Pre_refinedBins_bin.25	90.67	7.68	1	0	0	1	0	23	MQ
240	KR047A_Post2_refinedBins_bin.76	76.98	7.67	0	0	0	1	0	13	MQ
241	SJ053A_Post2_refinedBins_bin.63	56.19	7.67	0	0	0	0	0	16	MQ
242	UC20_Pre_refinedBins_bin.72	77.27	7.67	2	0	0	0	0	18	MQ
243	LL32A_Pre_refinedBins_bin.34	96.39	7.65	3	2	1	2	1	24	MQ
244	JJ7A_Post2_refinedBins_bin.6	65.74	7.64	1	0	0	0	0	11	MQ
245	SJ031C_Post2_refinedBins_bin.47	85.23	7.64	1	0	0	0	0	19	MQ
246	SJ043B_Post2_refinedBins_bin.11	52.2	7.64	0	0	0	2	0	8	MQ
247	SJ016D_Pre_refinedBins_bin.26	78.45	7.625	1	0	2	0	0	12	MQ
248	LL48A_Pre_refinedBins_bin.73	69.67	7.62	0	0	0	0	0	8	MQ
249	SJ074A_Post2_refinedBins_bin.30	84.47	7.62	2	1	0	0	0	16	MQ
250	BK10A_Pre_refinedBins_bin.27	88.13	7.61	1	0	0	1	0	11	MQ
251	SJ072B_Post2_refinedBins_bin.27	76.67	7.61	2	0	0	0	0	20	MQ
252	SJ091A_Pre_refinedBins_bin.62	69.74	7.61	1	0	0	0	0	13	MQ
253	BK8C_Pre_refinedBins_bin.73	65.27	7.6	1	1	1	0	0	13	MQ
254	SJ053A_Post2_refinedBins_bin.49	69.88	7.58	1	0	0	1	0	13	MQ
255	UC42_Pre_refinedBins_bin.74	84.8	7.58	1	0	0	0	0	14	MQ
256	LL31A_Pre_refinedBins_bin.112	85.81	7.56	2	0	0	1	0	23	MQ
257	LL48A_Pre_refinedBins_bin.55	99.98	7.56	2	0	1	0	0	23	MQ
258	SJ045D_Post2_refinedBins_bin.5	54.5	7.56	0	0	0	0	0	8	MQ
259	LL65C_Pre_refinedBins_bin.74	55.15	7.55	2	0	0	0	0	20	MQ
260	UC04_Pre_refinedBins_bin.81	100	7.55	1	0	0	0	0	19	MQ
261	SJ089A_Post2_refinedBins_bin.74	72.95	7.54	1	0	0	1	0	21	MQ
262	JK35B_Pre_refinedBins_bin.63	99.35	7.52	1	0	0	0	0	20	MQ
263	JL19B_Post2_refinedBins_bin.15	66.46	7.51	0	0	0	1	0	9	MQ
264	SJ011B_Post1_refinedBins_bin.54	53.68	7.51	1	0	0	0	0	11	MQ
265	SJ018B_Post2_refinedBins_bin.73	86.39	7.5	1	0	0	1	0	23	MQ
266	LL73D_Pre_refinedBins_bin.93	65.94	7.49	0	0	0	0	0	8	MQ
267	KR069H_Pre_refinedBins_bin.42	63.08	7.48	0	0	0	0	0	12	MQ
268	SJ025B_Post1_refinedBins_bin.11	61.8	7.48	0	0	0	0	0	11	MQ
269	SJ092A_Pre_refinedBins_bin.9	99.58	7.48	2	0	0	1	0	23	MQ
270	LL32C_Pre_refinedBins_bin.47	96.02	7.47	2	0	0	0	0	25	MQ
271	BK62D_Post1_refinedBins_bin.21	57.05	7.46	0	0	0	0	0	15	MQ
272	SJ002A_Post1_refinedBins_bin.81	87.08	7.45	0	0	0	0	0	15	MQ
273	SJ058B_Post2_refinedBins_bin.69	68.46	7.45	3	0	0	0	0	12	MQ
274	JH12B_Pre_refinedBins_bin.78	72.12	7.44	0	0	0	0	0	14	MQ
275	SJ058C_Post1_refinedBins_bin.61	51.23	7.44	0	1	0	0	0	11	MQ
276	SJ043B_Post1_refinedBins_bin.38	50.31	7.436	0	0	0	1	0	14	MQ
277	SJ031D_Post2_refinedBins_bin.67	83.49	7.42	0	1	0	0	0	16	MQ
278	JQ4E_Pre_refinedBins_bin.90	99.43	7.4	0	0	0	0	0	20	MQ
279	SJ045A_Post1_refinedBins_bin.39	87.77	7.4	2	1	0	0	0	22	MQ
280	UC67_Pre_refinedBins_bin.52	53.09	7.4	0	2	1	0	0	10	MQ
281	UC73_Pre_refinedBins_bin.90	94.39	7.398	3	0	0	0	0	21	MQ
282	KR042B_Pre_refinedBins_bin.45	87.28	7.38	2	0	0	0	0	18	MQ
283	BK54B_Post1_refinedBins_bin.18	85.75	7.37	0	0	1	0	0	18	MQ
284	LL75A_Pre_refinedBins_bin.4	99.98	7.37	3	0	0	0	0	23	MQ
285	LL9A_Pre_refinedBins_bin.26	50.19	7.37	1	0	0	0	0	18	MQ
286	SJ025C_Post2_refinedBins_bin.82	92.87	7.363	0	2	1	1	0	17	MQ
287	SJ024A_Pre_refinedBins_bin.47	57.21	7.36	0	0	0	0	0	21	MQ
288	SJ020A_Post1_refinedBins_bin.55	94.46	7.35	1	0	0	0	0	23	MQ
289	JL25B_Post2_refinedBins_bin.10	64.37	7.32	0	0	0	1	0	11	MQ
290	JT4B_Pre_refinedBins_bin.65	60.89	7.32	0	0	0	1	0	17	MQ
291	BK052A_Post2_refinedBins_bin.10	58.98	7.31	0	0	0	0	0	8	MQ
292	JC23C_Post1_refinedBins_bin.117	83.11	7.29	1	0	0	0	0	12	MQ
293	SJ058B_Post2_refinedBins_bin.131	60.9	7.272	1	0	0	0	0	15	MQ
294	SJ016A_Post1_refinedBins_bin.43	50.55	7.27	0	0	0	2	1	7	MQ
295	SJ073B_Pre_refinedBins_bin.2	54.7	7.26	1	0	0	0	0	11	MQ
296	UC36_Pre_refinedBins_bin.27	92.45	7.26	1	0	0	1	0	20	MQ
297	LL11B_Pre_refinedBins_bin.6	64.92	7.25	0	0	0	0	0	9	MQ
298	SJ003A_Post2_refinedBins_bin.48	74.56	7.25	0	0	1	1	0	10	MQ
299	SJ091D_Post2_refinedBins_bin.49	77.45	7.25	2	0	0	1	0	15	MQ
300	LL24B_Pre_refinedBins_bin.32	78.04	7.24	2	0	0	0	0	16	MQ
301	SJ072B_Post2_refinedBins_bin.13	94.98	7.23	1	0	0	0	0	19	MQ
302	SJ073A_Pre_refinedBins_bin.65	85.5	7.23	1	1	0	0	0	16	MQ
303	SJ076A_Pre_refinedBins_bin.54	50.99	7.2	0	0	0	0	0	12	MQ
304	BK18B_Pre_refinedBins_bin.10	88.15	7.19	2	0	1	0	0	23	MQ
305	KR026F_Pre_refinedBins_bin.72	70.91	7.18	0	0	0	0	0	12	MQ
306	LL33A_Pre_refinedBins_bin.84	55.01	7.18	1	0	0	0	0	11	MQ
307	SJ054B_Post2_refinedBins_bin.78	52.18	7.18	2	0	0	0	0	16	MQ
308	SJ095D_Pre_refinedBins_bin.18	67.65	7.17	0	3	2	2	2	15	MQ
309	UC11_Pre_refinedBins_bin.80	88.57	7.17	0	0	0	1	0	19	MQ
310	LL56B_Pre_refinedBins_bin.82	74.16	7.16	1	2	0	0	0	16	MQ
311	SJ045C_Pre_refinedBins_bin.79	56.31	7.16	1	0	0	0	1	11	MQ
312	SJ068B_Post1_refinedBins_bin.44	93.47	7.16	2	1	0	0	0	23	MQ
313	SJ091C_Pre_refinedBins_bin.74	68.21	7.155	0	0	0	0	0	19	MQ
314	BK62A_Post1_refinedBins_bin.5	78.29	7.15	1	1	1	0	0	15	MQ
315	JQ2A_Pre_refinedBins_bin.11	92.81	7.15	1	1	0	1	2	18	MQ
316	BK054C_Post1_refinedBins_bin.85	75.89	7.142	0	0	0	0	0	19	MQ
317	JK11D_Pre_refinedBins_bin.43	50	7.142	1	0	0	1	0	13	MQ
318	KR091C_Pre_refinedBins_bin.50	85.32	7.14	0	0	1	0	0	21	MQ
319	LL25D_Pre_refinedBins_bin.18	85.99	7.14	0	1	0	1	0	15	MQ
320	SJ058C_Post2_refinedBins_bin.11	53.07	7.14	1	0	0	0	0	6	MQ
321	UC11_Pre_refinedBins_bin.52	54.44	7.14	0	1	0	0	0	7	MQ
322	KR032A_Pre_refinedBins_bin.1	50.39	7.11	1	0	0	0	0	10	MQ
323	LL62A_Pre_refinedBins_bin.47	62.55	7.11	3	1	0	0	0	17	MQ
324	LL66B_Pre_refinedBins_bin.79	51.81	7.11	0	0	0	2	1	16	MQ
325	SJ017B_Pre_refinedBins_bin.47	75.56	7.11	1	0	0	1	1	15	MQ
326	KR067G_Post1_refinedBins_bin.86	59.98	7.1	0	0	0	0	0	8	MQ
327	SJ054C_Post1_refinedBins_bin.49	57.81	7.09	1	0	0	0	0	15	MQ
328	LL9E_Pre_refinedBins_bin.9	54.83	7.08	1	0	0	0	1	6	MQ
329	LL65A_Pre_refinedBins_bin.6	88.88	7.07	0	0	0	0	0	25	MQ
330	KR004E_Pre_refinedBins_bin.15	75.43	7.06	1	0	0	0	0	12	MQ
331	JJ5A_Pre_refinedBins_bin.76	97.38	7.04	0	0	1	2	0	15	MQ
332	JL25B_Post1_refinedBins_bin.22	50.62	7.04	0	0	0	0	0	8	MQ
333	LL62C_Pre_refinedBins_bin.77	74.67	7.04	4	0	0	0	0	21	MQ
334	BK054C_Pre_refinedBins_bin.13	85.31	7.03	1	0	0	0	0	20	MQ
335	KR048C_Pre_refinedBins_bin.57	96.41	7.03	4	0	0	0	0	21	MQ
336	LL73D_Pre_refinedBins_bin.83	54.31	7.03	0	1	0	0	0	7	MQ
337	JH2B_Pre_refinedBins_bin.72	51.75	7.017	0	0	0	0	0	11	MQ
338	JQ4A_Post1_refinedBins_bin.26	55.13	7.017	0	0	0	0	0	13	MQ
339	KR004F_Post2_refinedBins_bin.3	52.79	7.017	3	0	0	0	0	8	MQ
340	SJ016E_Post1_refinedBins_bin.7	54.38	7.017	1	1	0	0	0	13	MQ
341	SJ030B_Pre_refinedBins_bin.59	52.63	7.017	0	0	1	0	0	13	MQ
342	KR048C_Pre_refinedBins_bin.42	74.76	7.01	1	0	0	1	0	16	MQ
343	LL65D_Pre_refinedBins_bin.47	99.8	7.01	2	1	1	0	0	23	MQ
344	SJ054C_Post1_refinedBins_bin.19	74.26	7.01	2	0	1	0	0	16	MQ
345	SJ045A_Pre_refinedBins_bin.36	55.62	6.99	0	1	0	0	0	12	MQ
346	SJ054C_Post2_refinedBins_bin.38	78.91	6.98	1	0	0	0	0	23	MQ
347	SJ058F_Post1_refinedBins_bin.16	81.45	6.98	1	0	0	0	0	12	MQ
348	UC40_Pre_refinedBins_bin.73	92.66	6.98	4	0	0	1	0	23	MQ
349	JL19B_Post1_refinedBins_bin.21	99.16	6.96	1	0	0	0	0	20	MQ
350	LL53A_Pre_refinedBins_bin.90	56.66	6.95	1	0	0	0	0	19	MQ
351	SJ017A_Pre_refinedBins_bin.31	61.35	6.94	0	0	0	0	0	10	MQ
352	LL25D_Pre_refinedBins_bin.64	83.49	6.93	0	0	0	2	0	19	MQ
353	JC23E_Post1_refinedBins_bin.81	98.56	6.91	0	0	0	0	0	26	MQ
354	SJ016E_Pre_refinedBins_bin.33	71.64	6.91	0	0	0	0	0	6	MQ
355	LL75A_Pre_refinedBins_bin.59	58.19	6.9	0	0	0	1	0	21	MQ
356	SJ024A_Post1_refinedBins_bin.39	63.82	6.9	1	0	0	1	0	15	MQ
357	SJ072B_Post1_refinedBins_bin.53	83	6.9	2	0	0	0	0	18	MQ
358	KR032A_Post1_refinedBins_bin.15	56.89	6.896	0	0	0	1	0	17	MQ
359	LL22B_Pre_refinedBins_bin.99	57.52	6.896	0	0	0	0	0	15	MQ
360	LL55C_Pre_refinedBins_bin.84	55.17	6.896	2	0	0	0	0	16	MQ
361	SJ003D_Pre_refinedBins_bin.38	50	6.896	1	0	0	0	0	12	MQ
362	SJ024A_Pre_refinedBins_bin.72	58.54	6.896	0	0	0	1	0	16	MQ
363	SJ058E_Post1_refinedBins_bin.40	56.78	6.89	0	0	0	0	0	10	MQ
364	JQ12B_Post1_refinedBins_bin.70	89.2	6.88	1	0	0	0	0	17	MQ
365	SJ073A_Pre_refinedBins_bin.44	100	6.88	1	0	0	0	0	23	MQ
366	BK54B_Pre_refinedBins_bin.31	61.16	6.87	1	0	0	1	0	17	MQ
367	LL57A_Pre_refinedBins_bin.67	99.89	6.87	0	0	1	0	0	20	MQ
368	JQ4B_Post1_refinedBins_bin.26	68.74	6.86	1	0	1	0	0	14	MQ
369	LL61A_Pre_refinedBins_bin.85	53.46	6.85	1	0	0	1	0	14	MQ
370	LL31F_Pre_refinedBins_bin.10	85.49	6.84	0	0	0	1	0	19	MQ
371	SJ016E_Post1_refinedBins_bin.41	77.96	6.84	2	0	1	0	0	19	MQ
372	SJ040A_Post2_refinedBins_bin.39	76.07	6.84	0	0	0	0	0	10	MQ
373	SJ023D_Post2_refinedBins_bin.17	68.21	6.82	1	1	0	1	0	20	MQ
374	SJ040A_Post1_refinedBins_bin.53	66.36	6.82	4	0	0	0	0	17	MQ
375	SJ058F_Post2_refinedBins_bin.80	94.6	6.82	2	1	0	1	0	18	MQ
376	SJ018B_Post2_refinedBins_bin.51	95.6	6.818	1	0	0	1	0	23	MQ
377	KR047A_Post1_refinedBins_bin.33	71.18	6.81	1	0	0	0	0	17	MQ
378	SJ021A_Post1_refinedBins_bin.33	92.8	6.81	2	0	0	0	0	21	MQ
379	UC50_Pre_refinedBins_bin.60	73.95	6.81	3	1	0	0	0	21	MQ
380	SJ067A_Pre_refinedBins_bin.8	98.58	6.8	1	0	0	0	0	22	MQ
381	LL13C_Pre_refinedBins_bin.17	96.63	6.79	2	0	1	0	0	22	MQ
382	SJ040A_Post2_refinedBins_bin.31	64.64	6.79	2	0	0	1	1	20	MQ
383	LL61D_Pre_refinedBins_bin.66	50.32	6.78	1	0	0	0	0	16	MQ
384	UC28_Pre_refinedBins_bin.13	99.05	6.77	2	0	0	3	0	23	MQ
385	BK057A_Post2_refinedBins_bin.50	60.2	6.76	0	0	0	0	0	9	MQ
386	LL9B_Pre_refinedBins_bin.5	70.32	6.76	0	0	0	1	0	13	MQ
387	SJ067A_Post1_refinedBins_bin.5	92.61	6.76	1	0	0	2	2	23	MQ
388	UC22_Pre_refinedBins_bin.70	80.85	6.75	0	0	0	1	0	21	MQ
389	KR057B_Pre_refinedBins_bin.2	73.71	6.74	1	0	0	0	0	13	MQ
390	SJ016D_Pre_refinedBins_bin.21	76.66	6.73	1	0	0	0	0	12	MQ
391	SJ045D_Pre_refinedBins_bin.28	85.88	6.73	1	1	0	0	0	20	MQ
392	KR059B_Pre_refinedBins_bin.56	63.62	6.72	0	0	0	0	0	18	MQ
393	SJ021B_Pre_refinedBins_bin.34	79.88	6.72	3	0	0	0	0	22	MQ
394	SJ045D_Post2_refinedBins_bin.13	86.62	6.72	3	1	0	0	0	20	MQ
395	KR067F_Post1_refinedBins_bin.35	83.3	6.69	1	1	1	1	1	23	MQ
396	BK18A_Pre_refinedBins_bin.77	87.3	6.68	1	0	0	1	0	23	MQ
397	SJ018A_Post1_refinedBins_bin.69	71.11	6.68	0	0	0	0	0	11	MQ
398	SJ069B_Post1_refinedBins_bin.44	73.8	6.68	0	0	1	0	0	18	MQ
399	SJ089B_Pre_refinedBins_bin.89	58.07	6.68	0	0	0	1	0	15	MQ
400	LL13A_Pre_refinedBins_bin.72	78.27	6.65	0	0	0	1	0	14	MQ
401	BK8C_Pre_refinedBins_bin.49	81.55	6.64	1	0	0	1	1	15	MQ
402	SJ031C_Post1_refinedBins_bin.64	70.46	6.64	0	0	1	0	0	11	MQ
403	KR059B_Pre_refinedBins_bin.4	86.88	6.63	2	0	1	1	0	16	MQ
404	KR069H_Pre_refinedBins_bin.14	58.73	6.63	0	0	0	0	0	13	MQ
405	LL32A_Pre_refinedBins_bin.35	82.4	6.63	0	0	0	0	0	10	MQ
406	SJ082A_Post2_refinedBins_bin.33	62.11	6.63	0	0	0	0	0	12	MQ
407	SJ004C_Pre_refinedBins_bin.69	89.16	6.62	0	0	0	0	1	11	MQ
408	SJ018B_Post1_refinedBins_bin.63	57.19	6.62	1	0	0	0	0	12	MQ
409	SJ096A_Pre_refinedBins_bin.60	58.51	6.62	1	0	0	0	0	12	MQ
410	KR091C_Pre_refinedBins_bin.34	59.31	6.61	1	0	0	0	0	15	MQ
411	BK059C_Pre_refinedBins_bin.101	63.62	6.6	1	0	0	0	0	22	MQ
412	BK60A_Post1_refinedBins_bin.79	87.02	6.6	0	0	0	0	0	14	MQ
413	BK62B_Pre_refinedBins_bin.28	94.84	6.6	2	0	0	1	0	25	MQ
414	JQ19B_Post2_refinedBins_bin.34	99.98	6.6	1	0	0	1	0	21	MQ
415	LL5D_Pre_refinedBins_bin.73	70.85	6.6	0	0	0	0	0	11	MQ
416	SJ078B_Post1_refinedBins_bin.31	53.12	6.6	1	0	0	1	1	14	MQ
417	BK62D_Post2_refinedBins_bin.73	85.56	6.58	0	0	0	0	0	21	MQ
418	JQ12B_Pre_refinedBins_bin.50	60.34	6.58	1	0	0	1	1	8	MQ
419	KR032A_Pre_refinedBins_bin.74	51.03	6.58	3	0	0	0	0	13	MQ
420	LL65C_Pre_refinedBins_bin.23	71.01	6.58	1	0	0	0	0	13	MQ
421	BK8C_Pre_refinedBins_bin.8	100	6.57	2	0	1	0	0	25	MQ
422	JK11D_Pre_refinedBins_bin.37	70.15	6.57	1	0	0	1	0	17	MQ
423	SJ068A_Post1_refinedBins_bin.12	77.03	6.57	0	1	1	0	0	21	MQ
424	SJ068B_Post1_refinedBins_bin.39	87.81	6.56	2	1	1	2	1	22	MQ
425	UC57_Pre_refinedBins_bin.5	76.42	6.56	2	0	0	1	0	14	MQ
426	SJ024A_Post2_refinedBins_bin.8	76.32	6.54	0	0	1	0	0	18	MQ
427	SJ058D_Post2_refinedBins_bin.65	74.41	6.54	0	0	0	0	0	21	MQ
428	SJ016B_Post2_refinedBins_bin.55	75.14	6.53	2	0	0	0	0	20	MQ
429	UC41_Pre_refinedBins_bin.87	99.99	6.53	1	0	0	0	0	25	MQ
430	BK5A_Post1_refinedBins_bin.47	57.19	6.52	0	0	0	0	0	10	MQ
431	JK11D_Pre_refinedBins_bin.67	59.8	6.52	0	0	0	0	0	16	MQ
432	LL26A_Pre_refinedBins_bin.43	56.16	6.52	1	0	1	0	0	12	MQ
433	SJ091C_Post1_refinedBins_bin.8	55.04	6.52	0	0	0	0	0	8	MQ
434	LL24B_Pre_refinedBins_bin.39	84.89	6.51	1	0	0	0	0	20	MQ
435	SJ010C_Pre_refinedBins_bin.17	84.68	6.51	1	0	0	0	0	18	MQ
436	SJ067D_Pre_refinedBins_bin.9	87.8	6.5	1	0	1	0	0	22	MQ
437	SJ023C_Post2_refinedBins_bin.27	57.51	6.48	1	0	0	0	1	13	MQ
438	UC41_Pre_refinedBins_bin.45	52.91	6.48	1	0	0	0	1	20	MQ
439	KR056A_Post1_refinedBins_bin.28	99.9	6.47	3	0	0	1	0	20	MQ
440	LL73D_Pre_refinedBins_bin.64	64.63	6.46	0	0	0	0	0	16	MQ
441	SJ062A_Pre_refinedBins_bin.85	76.23	6.46	1	0	0	0	0	8	MQ
442	SJ067B_Post2_refinedBins_bin.112	99.51	6.46	4	2	4	1	1	23	MQ
443	LL9B_Pre_refinedBins_bin.29	52.28	6.451	0	0	0	0	0	13	MQ
444	JC23C_Pre_refinedBins_bin.58	87.48	6.45	3	0	0	0	0	23	MQ
445	LL15A_Pre_refinedBins_bin.35	52.45	6.45	1	1	0	1	0	10	MQ
446	LL55C_Pre_refinedBins_bin.93	65.26	6.45	0	0	0	0	0	12	MQ
447	LL75A_Pre_refinedBins_bin.5	86.2	6.45	0	0	0	2	0	16	MQ
448	SJ025B_Post1_refinedBins_bin.69	85.72	6.45	2	0	0	0	0	17	MQ
449	JJ7A_Post1_refinedBins_bin.71	81.22	6.44	0	0	0	0	0	22	MQ
450	KR067E_Post1_refinedBins_bin.53	77.94	6.44	0	0	0	0	0	15	MQ
451	LL9C_Pre_refinedBins_bin.74	72.35	6.44	0	0	0	1	0	14	MQ
452	SJ018B_Pre_refinedBins_bin.29	68.17	6.44	0	1	1	0	0	10	MQ
453	SJ020A_Pre_refinedBins_bin.46	90.67	6.44	0	0	0	1	0	17	MQ
454	UC24_Pre_refinedBins_bin.88	57.26	6.44	0	0	0	0	0	10	MQ
455	SJ017A_Pre_refinedBins_bin.65	86.88	6.43	0	0	1	0	0	23	MQ
456	SJ045A_Pre_refinedBins_bin.74	85.72	6.43	1	0	1	0	0	22	MQ
457	KR048C_Pre_refinedBins_bin.32	57.92	6.42	0	1	1	0	0	13	MQ
458	LL5A_Pre_refinedBins_bin.51	71.61	6.42	0	1	0	1	0	15	MQ
459	KR042A_Pre_refinedBins_bin.48	87.1	6.41	0	0	1	1	1	18	MQ
460	LL15A_Pre_refinedBins_bin.58	74.74	6.41	0	0	0	0	0	13	MQ
461	SJ054B_Post1_refinedBins_bin.47	92.11	6.4	0	0	0	0	0	11	MQ
462	BK16E_Pre_refinedBins_bin.92	79.39	6.39	1	0	0	0	0	18	MQ
463	BK6A_Pre_refinedBins_bin.36	54.08	6.39	1	0	1	0	0	12	MQ
464	SJ001B_Post2_refinedBins_bin.65	56.04	6.39	0	0	0	0	0	8	MQ
465	SJ003B_Pre_refinedBins_bin.93	54.71	6.39	0	1	0	0	0	23	MQ
466	SJ067G_Pre_refinedBins_bin.54	85.19	6.38	0	0	0	0	0	20	MQ
467	KR056A_Pre_refinedBins_bin.6	84.88	6.37	3	1	1	0	0	18	MQ
468	KR095A_Pre_refinedBins_bin.15	61.69	6.37	1	0	0	0	0	15	MQ
469	LL26A_Pre_refinedBins_bin.9	72.74	6.36	1	0	0	1	0	19	MQ
470	SJ032D_Post2_refinedBins_bin.77	88.23	6.36	1	0	0	0	0	16	MQ
471	SJ033C_Post1_refinedBins_bin.83	88.82	6.36	2	0	0	0	0	16	MQ
472	UC45_Pre_refinedBins_bin.99	79.49	6.36	0	0	0	0	0	12	MQ
473	LL33A_Pre_refinedBins_bin.77	94.87	6.35	4	0	0	1	0	25	MQ
474	UC21_Pre_refinedBins_bin.40	72.35	6.32	1	0	0	1	0	19	MQ
475	BK60A_Post1_refinedBins_bin.3	93.8	6.31	0	0	0	0	0	24	MQ
476	JJ7A_Post1_refinedBins_bin.19	94.97	6.31	2	0	1	1	0	24	MQ
477	KR099A_Post2_refinedBins_bin.14	72.98	6.31	5	0	0	0	0	20	MQ
478	KR057B_Post1_refinedBins_bin.41	82.65	6.3	1	0	1	0	0	22	MQ
479	SJ068B_Post1_refinedBins_bin.12	69.26	6.3	0	1	1	0	0	17	MQ
480	LL25A_Pre_refinedBins_bin.72	83.14	6.29	0	0	0	1	0	12	MQ
481	SJ058C_Post1_refinedBins_bin.52	82.97	6.29	1	0	0	3	0	20	MQ
482	UC52_Pre_refinedBins_bin.29	100	6.29	0	0	0	0	0	18	MQ
483	JL19A_Post1_refinedBins_bin.57	72.33	6.28	2	1	1	1	0	14	MQ
484	KR026A_Pre_refinedBins_bin.58	92.58	6.28	2	0	0	2	1	23	MQ
485	SJ082C_Pre_refinedBins_bin.4	79.76	6.28	0	0	0	2	0	20	MQ
486	LL61B_Pre_refinedBins_bin.83	60.53	6.27	4	0	0	0	0	15	MQ
487	SJ021A_Pre_refinedBins_bin.67	83.89	6.27	0	0	0	0	0	19	MQ
488	SJ069B_Pre_refinedBins_bin.21	61.04	6.27	1	0	0	0	0	13	MQ
489	SJ095B_Post1_refinedBins_bin.35	50.89	6.26	1	0	0	0	0	16	MQ
490	JK35C_Pre_refinedBins_bin.9	54.03	6.25	0	0	0	0	0	16	MQ
491	KR042C_Pre_refinedBins_bin.32	66.3	6.25	0	0	0	0	0	11	MQ
492	LL31B_Pre_refinedBins_bin.18	55.96	6.25	0	0	0	0	0	19	MQ
493	SJ024A_Post1_refinedBins_bin.100	79.81	6.25	4	0	0	0	0	12	MQ
494	SJ091C_Post2_refinedBins_bin.39	66.24	6.24	1	0	0	1	0	11	MQ
495	UC08_Pre_refinedBins_bin.114	77.18	6.24	1	0	0	0	0	20	MQ
496	UC08_Pre_refinedBins_bin.99	65.49	6.24	1	0	1	2	0	19	MQ
497	JC6B_Pre_refinedBins_bin.25	73.84	6.23	0	0	0	1	0	21	MQ
498	SJ088B_Pre_refinedBins_bin.17	60.4	6.23	2	0	0	1	0	19	MQ
499	KR048C_Post1_refinedBins_bin.58	50.99	6.22	0	0	0	0	0	6	MQ
500	KR067G_Post2_refinedBins_bin.32	88.47	6.22	0	0	0	1	1	17	MQ
501	BK16A_Pre_refinedBins_bin.51	78.63	6.21	2	0	0	0	0	9	MQ
502	BK5A_Post1_refinedBins_bin.26	100	6.2	0	1	1	0	0	23	MQ
503	KR091A_Pre_refinedBins_bin.5	83.05	6.2	0	0	0	0	0	16	MQ
504	LL53B_Pre_refinedBins_bin.79	89.72	6.2	1	0	0	0	0	17	MQ
505	SJ016E_Post1_refinedBins_bin.69	80.06	6.2	1	0	0	1	0	20	MQ
506	BK057A_Post1_refinedBins_bin.23	67.54	6.19	0	0	1	0	0	15	MQ
507	JH9B_Post2_refinedBins_bin.33	85.47	6.19	0	0	0	2	0	15	MQ
508	JQ2A_Post2_refinedBins_bin.49	100	6.19	0	0	0	0	0	17	MQ
509	KR067F_Post1_refinedBins_bin.44	94.22	6.19	1	1	1	0	0	21	MQ
510	KR099A_Post2_refinedBins_bin.59	79.98	6.19	0	0	0	0	0	19	MQ
511	LL4D_Pre_refinedBins_bin.11	79.32	6.19	0	0	0	0	0	12	MQ
512	SJ067A_Post2_refinedBins_bin.8	98.71	6.19	1	0	0	2	2	23	MQ
513	SJ068A_Post1_refinedBins_bin.22	80.64	6.19	0	0	0	1	1	12	MQ
514	SJ033C_Post1_refinedBins_bin.90	79.48	6.18	1	1	0	0	0	17	MQ
515	KR048B_Pre_refinedBins_bin.50	70.01	6.17	0	0	0	0	0	9	MQ
516	SJ001B_Post2_refinedBins_bin.78	97.47	6.17	1	0	0	1	0	22	MQ
517	KR004B_Post2_refinedBins_bin.19	99.99	6.16	2	0	0	0	0	25	MQ
518	SJ003C_Post1_refinedBins_bin.44	70.77	6.16	0	0	0	0	0	15	MQ
519	UC22_Pre_refinedBins_bin.98	100	6.16	1	0	0	0	0	21	MQ
520	SJ067B_Post1_refinedBins_bin.86	51.15	6.15	2	0	0	0	0	12	MQ
521	SJ089A_Post1_refinedBins_bin.65	70.81	6.15	1	0	0	0	0	14	MQ
522	SJ045E_Pre_refinedBins_bin.55	92.61	6.14	1	1	1	0	0	14	MQ
523	KR069D_Pre_refinedBins_bin.29	75.56	6.13	1	0	0	0	0	20	MQ
524	SJ018B_Post1_refinedBins_bin.12	52.8	6.13	4	0	0	0	0	17	MQ
525	SJ033C_Post1_refinedBins_bin.48	63.08	6.13	0	1	1	1	0	12	MQ
526	SJ067B_Pre_refinedBins_bin.81	92.91	6.13	2	0	0	0	0	24	MQ
527	LL5B_Pre_refinedBins_bin.54	88.12	6.12	0	0	1	0	0	17	MQ
528	LL71E_Pre_refinedBins_bin.24	63.87	6.11	1	1	1	1	0	12	MQ
529	SJ011B_Post1_refinedBins_bin.89	73.03	6.1	0	0	0	0	0	21	MQ
530	BK052A_Post2_refinedBins_bin.20	99.78	6.09	2	1	1	0	0	21	MQ
531	KR059C_Pre_refinedBins_bin.72	99.98	6.09	0	2	1	2	0	21	MQ
532	SJ024B_Post2_refinedBins_bin.52	52.07	6.09	0	0	0	0	0	9	MQ
533	JK35B_Pre_refinedBins_bin.58	78.02	6.08	0	0	0	0	0	22	MQ
534	KR004F_Post2_refinedBins_bin.4	93.98	6.08	2	0	0	1	0	22	MQ
535	SJ011B_Pre_refinedBins_bin.69	66.4	6.08	1	2	2	1	1	10	MQ
536	LL1C_Pre_refinedBins_bin.46	95.18	6.07	2	0	0	0	0	21	MQ
537	LL54D_Pre_refinedBins_bin.10	50.11	6.07	0	0	1	0	0	14	MQ
538	SJ045A_Post2_refinedBins_bin.1	94.68	6.07	1	0	0	0	0	23	MQ
539	SJ062A_Pre_refinedBins_bin.51	74.98	6.07	1	0	0	0	0	9	MQ
540	KR030D_Pre_refinedBins_bin.82	50.24	6.06	3	0	0	0	0	13	MQ
541	KR099A_Post2_refinedBins_bin.57	60.33	6.06	1	0	0	0	0	15	MQ
542	LL9B_Pre_refinedBins_bin.50	93.21	6.06	0	0	0	0	0	24	MQ
543	SJ054A_Post1_refinedBins_bin.50	63.19	6.06	1	0	0	0	0	14	MQ
544	LL66A_Pre_refinedBins_bin.69	92.73	6.05	2	0	0	0	0	18	MQ
545	SJ021B_Pre_refinedBins_bin.51	71.97	6.05	0	1	1	1	0	15	MQ
546	KR004E_Pre_refinedBins_bin.55	52.64	6.04	0	1	0	0	0	7	MQ
547	SJ033C_Post1_refinedBins_bin.27	75.25	6.04	0	0	0	1	0	17	MQ
548	UC60_Pre_refinedBins_bin.67	55.95	6.034	0	0	1	0	1	11	MQ
549	UC23_Pre_refinedBins_bin.33	78.82	6.03	3	1	0	0	0	16	MQ
550	SJ082D_Pre_refinedBins_bin.43	98.19	6.01	2	1	1	0	0	21	MQ
551	SJ091B_Post2_refinedBins_bin.1	71.85	6.01	0	0	0	0	0	16	MQ
552	SJ058C_Post1_refinedBins_bin.38	51.12	6	2	0	1	0	0	16	MQ
553	LL65C_Pre_refinedBins_bin.70	71.32	5.99	0	0	0	1	0	11	MQ
554	BK054A_Pre_refinedBins_bin.12	86.56	5.98	1	0	0	0	1	17	MQ
555	KR099A_Pre_refinedBins_bin.5	99.47	5.98	1	0	0	0	0	22	MQ
556	JJ7A_Pre_refinedBins_bin.66	76.2	5.96	0	0	0	0	0	15	MQ
557	JQ2A_Post1_refinedBins_bin.55	89.72	5.96	2	1	0	0	0	21	MQ
558	KR004F_Pre_refinedBins_bin.17	81.64	5.96	0	0	0	0	0	16	MQ
559	KR026F_Pre_refinedBins_bin.11	92.68	5.96	0	0	0	0	0	22	MQ
560	LL41A_Pre_refinedBins_bin.19	57.82	5.96	0	0	0	1	0	10	MQ
561	LL64D_Pre_refinedBins_bin.56	59.65	5.96	1	0	0	0	0	16	MQ
562	LL66B_Pre_refinedBins_bin.82	57.79	5.96	0	0	0	0	0	14	MQ
563	SJ058C_Post1_refinedBins_bin.16	81.6	5.96	2	1	0	1	0	20	MQ
564	LL64D_Pre_refinedBins_bin.19	99.72	5.95	2	0	0	0	0	24	MQ
565	LL1B_Pre_refinedBins_bin.70	99.15	5.94	3	0	0	0	1	23	MQ
566	SJ002A_Pre_refinedBins_bin.35	99.99	5.94	1	0	0	1	0	24	MQ
567	SJ032C_Post2_refinedBins_bin.62	62.5	5.94	1	0	0	1	1	14	MQ
568	LL31B_Pre_refinedBins_bin.71	50.63	5.93	0	0	0	0	0	9	MQ
569	LL47A_Pre_refinedBins_bin.78	85.92	5.93	0	0	1	0	0	24	MQ
570	SJ043B_Post1_refinedBins_bin.9	66.21	5.93	0	0	0	0	0	21	MQ
571	BK052A_Post2_refinedBins_bin.47	72.3	5.92	1	2	0	0	1	15	MQ
572	JC3B_Pre_refinedBins_bin.21	71.07	5.92	2	0	0	0	0	20	MQ
573	UC47_Pre_refinedBins_bin.21	84.04	5.91	1	0	0	0	1	16	MQ
574	JC5A_Pre_refinedBins_bin.1	83.7	5.9	1	1	1	0	0	15	MQ
575	KR004F_Post1_refinedBins_bin.23	56.62	5.9	0	0	0	0	0	16	MQ
576	SJ017A_Post1_refinedBins_bin.60	64.66	5.89	0	0	0	0	0	15	MQ
577	SJ021A_Pre_refinedBins_bin.42	93.33	5.89	0	0	0	0	0	24	MQ
578	JC5A_Pre_refinedBins_bin.50	99.79	5.88	5	0	0	0	0	23	MQ
579	KR042A_Pre_refinedBins_bin.87	92.97	5.88	0	0	0	0	0	24	MQ
580	KR067E_Pre_refinedBins_bin.32	53.11	5.88	1	1	0	0	0	11	MQ
581	LL25C_Pre_refinedBins_bin.42	53.08	5.88	1	1	1	0	0	13	MQ
582	LL31D_Pre_refinedBins_bin.67	81.57	5.88	1	0	1	0	0	15	MQ
583	SJ016E_Post2_refinedBins_bin.99	51.74	5.872	0	0	0	0	0	9	MQ
584	SJ025E_Post2_refinedBins_bin.43	51.76	5.87	1	0	0	0	0	16	MQ
585	KR057B_Pre_refinedBins_bin.81	100	5.86	3	0	0	0	0	22	MQ
586	LL9B_Pre_refinedBins_bin.21	85.07	5.86	0	0	0	2	0	18	MQ
587	SJ043B_Post2_refinedBins_bin.14	88.5	5.86	1	0	0	1	0	21	MQ
588	BK051A_Post2_refinedBins_bin.80	77.31	5.85	0	0	0	0	0	23	MQ
589	BK29A_Pre_refinedBins_bin.48	73.85	5.85	1	0	0	0	0	18	MQ
590	KR059B_Pre_refinedBins_bin.52	68.27	5.85	0	0	0	0	0	8	MQ
591	LL9B_Pre_refinedBins_bin.4	91.74	5.85	1	0	0	0	0	22	MQ
592	LL75A_Pre_refinedBins_bin.32	98	5.82	3	0	0	0	0	24	MQ
593	BK051A_pre_refinedBins_bin.72	88.3	5.81	1	0	0	0	0	17	MQ
594	BK11B_Pre_refinedBins_bin.15	83.92	5.81	0	0	0	1	0	23	MQ
595	KR026F_Pre_refinedBins_bin.65	100	5.81	1	0	0	0	0	22	MQ
596	KR107C_Pre_refinedBins_bin.69	71.81	5.81	0	0	0	2	0	11	MQ
597	SJ003A_Post2_refinedBins_bin.15	79.81	5.8	3	0	0	0	0	14	MQ
598	BK8B_Pre_refinedBins_bin.95	79.6	5.79	2	0	0	0	0	14	MQ
599	LL42A_Pre_refinedBins_bin.4	82.19	5.79	2	1	1	0	0	14	MQ
600	LL62A_Pre_refinedBins_bin.34	79.17	5.79	1	0	0	0	0	18	MQ
601	LL65A_Pre_refinedBins_bin.22	71.43	5.79	0	0	0	1	0	18	MQ
602	LL32C_Pre_refinedBins_bin.19	74.73	5.78	1	1	0	0	0	8	MQ
603	JK35C_Pre_refinedBins_bin.24	66.02	5.77	0	1	0	1	0	11	MQ
604	LL54D_Pre_refinedBins_bin.75	93.75	5.77	2	0	0	0	0	22	MQ
605	LL5A_Pre_refinedBins_bin.19	77.95	5.77	0	0	0	0	0	15	MQ
606	SJ016D_Post1_refinedBins_bin.18	50.61	5.75	0	0	0	0	0	12	MQ
607	SJ024A_Post2_refinedBins_bin.77	76.28	5.75	2	0	0	0	0	23	MQ
608	SJ012A_Pre_refinedBins_bin.29	63.75	5.74	0	0	0	2	0	11	MQ
609	BK7A_Pre_refinedBins_bin.11	95.69	5.73	0	0	0	0	0	22	MQ
610	SJ024A_Post2_refinedBins_bin.64	85.42	5.73	1	0	1	1	0	22	MQ
611	JC23E_Pre_refinedBins_bin.52	64.15	5.72	0	0	0	1	1	14	MQ
612	KR067G_Post2_refinedBins_bin.49	89.6	5.72	0	1	1	0	0	12	MQ
613	LL55C_Pre_refinedBins_bin.35	80.37	5.72	0	0	0	0	1	13	MQ
614	LL13C_Pre_refinedBins_bin.66	89.05	5.71	1	0	0	0	0	23	MQ
615	BK14A_Post2_refinedBins_bin.74	78.77	5.7	2	0	1	0	0	24	MQ
616	SJ053A_Post1_refinedBins_bin.53	69.01	5.7	1	1	1	0	0	9	MQ
617	UC48_Pre_refinedBins_bin.54	88.28	5.7	0	0	0	0	0	17	MQ
618	KR004F_Post1_refinedBins_bin.66	94.99	5.69	6	0	0	0	0	25	MQ
619	KR067G_Post1_refinedBins_bin.101	80.1	5.69	0	0	0	0	0	18	MQ
620	SJ095B_pre_refinedBins_bin.32	59.52	5.68	1	0	0	0	0	16	MQ
621	UC21_Pre_refinedBins_bin.41	98.63	5.68	2	0	1	0	0	23	MQ
622	UC22_Pre_refinedBins_bin.97	87.93	5.68	1	0	1	0	0	14	MQ
623	JH12B_Post1_refinedBins_bin.35	51.61	5.67	3	0	0	0	0	14	MQ
624	KR067G_Post2_refinedBins_bin.51	76.86	5.67	0	0	1	0	0	13	MQ
625	LL47A_Pre_refinedBins_bin.50	74.17	5.67	0	0	1	0	0	12	MQ
626	LL53C_Pre_refinedBins_bin.64	60.19	5.67	0	1	1	0	0	7	MQ
627	SJ025D_Pre_refinedBins_bin.48	77.91	5.67	3	0	0	1	0	21	MQ
628	SJ067G_Pre_refinedBins_bin.18	70.92	5.66	1	0	0	0	0	11	MQ
629	BK29B_Pre_refinedBins_bin.47	84.32	5.65	0	0	1	0	0	17	MQ
630	KR057B_Pre_refinedBins_bin.84	81.78	5.65	1	1	1	0	0	20	MQ
631	KR067E_Pre_refinedBins_bin.1	78.08	5.64	1	0	0	1	0	23	MQ
632	LL6B_Pre_refinedBins_bin.49	52.32	5.64	1	0	0	0	0	8	MQ
633	LL65B_Pre_refinedBins_bin.54	99.99	5.63	4	1	0	0	0	24	MQ
634	SJ048A_Post2_refinedBins_bin.39	50.17	5.63	0	0	0	1	0	9	MQ
635	BK54B_Pre_refinedBins_bin.22	71.77	5.62	0	0	0	0	0	15	MQ
636	KR048B_Post1_refinedBins_bin.2	65.09	5.62	0	0	0	0	0	12	MQ
637	KR067F_Post1_refinedBins_bin.69	86.88	5.62	1	0	2	1	0	22	MQ
638	LL53A_Pre_refinedBins_bin.35	77.32	5.62	1	0	0	0	0	18	MQ
639	SJ076B_Pre_refinedBins_bin.27	52.09	5.62	1	0	0	0	0	10	MQ
640	SJ091D_Post1_refinedBins_bin.14	82.03	5.62	1	0	1	0	0	19	MQ
641	BK1A_Pre_refinedBins_bin.85	53.27	5.61	0	1	1	0	0	14	MQ
642	BK7A_Pre_refinedBins_bin.73	99.97	5.6	3	2	2	2	2	24	MQ
643	JJ7A_Post2_refinedBins_bin.25	96.68	5.6	2	0	0	0	0	23	MQ
644	KR059C_Pre_refinedBins_bin.14	80.47	5.6	2	0	0	0	0	17	MQ
645	SJ054A_Post2_refinedBins_bin.43	82.03	5.6	0	0	0	0	0	11	MQ
646	SJ089B_Post1_refinedBins_bin.1	58.23	5.6	0	0	0	0	1	13	MQ
647	KR069A_Pre_refinedBins_bin.25	52.68	5.59	0	0	0	0	0	10	MQ
648	SJ032C_Pre_refinedBins_bin.52	95.31	5.59	1	0	0	1	1	16	MQ
649	BK29B_Pre_refinedBins_bin.33	95.93	5.58	1	0	0	2	0	24	MQ
650	KR063A_Pre_refinedBins_bin.29	89.96	5.58	1	0	0	0	0	25	MQ
651	SJ001B_Pre_refinedBins_bin.71	52.41	5.58	0	0	0	0	0	14	MQ
652	SJ010B_Pre_refinedBins_bin.22	91.69	5.58	0	0	0	2	2	24	MQ
653	SJ067F_Post2_refinedBins_bin.14	99.91	5.58	0	0	0	1	0	23	MQ
654	SJ088A_Post1_refinedBins_bin.65	87.4	5.58	1	1	0	0	0	14	MQ
655	KR048C_Pre_refinedBins_bin.40	86.32	5.57	1	1	1	0	0	14	MQ
656	SJ047A_Pre_refinedBins_bin.57	85.57	5.57	0	0	0	0	0	15	MQ
657	SJ078B_Post1_refinedBins_bin.43	87	5.56	1	1	1	1	1	20	MQ
658	UC44_Pre_refinedBins_bin.78	86.63	5.56	3	1	0	0	0	24	MQ
659	BK60A_Post1_refinedBins_bin.8	100	5.55	1	0	0	0	0	22	MQ
660	BK60A_Post2_refinedBins_bin.41	61.43	5.55	1	0	0	0	0	19	MQ
661	BK6A_Pre_refinedBins_bin.26	74.58	5.55	1	0	0	0	0	22	MQ
662	LL65A_Pre_refinedBins_bin.42	97.51	5.55	1	0	0	0	0	21	MQ
663	SJ082A_Post1_refinedBins_bin.47	78.94	5.55	0	0	0	0	0	22	MQ
664	SJ086B_Pre_refinedBins_bin.48	79.31	5.55	1	0	0	0	0	12	MQ
665	UC05_Pre_refinedBins_bin.78	78.1	5.55	0	0	0	0	0	16	MQ
666	BK18B_Pre_refinedBins_bin.16	77.91	5.54	0	0	0	0	0	19	MQ
667	JQ4D_Pre_refinedBins_bin.40	74.21	5.54	0	0	0	0	0	19	MQ
668	SJ016C_Post2_refinedBins_bin.98	88.31	5.54	0	0	0	1	1	21	MQ
669	SJ043B_Pre_refinedBins_bin.68	80.72	5.54	0	0	0	0	0	12	MQ
670	SJ058E_Post2_refinedBins_bin.39	84.24	5.54	0	0	0	0	0	16	MQ
671	SJ092A_Pre_refinedBins_bin.48	72.83	5.54	0	1	0	0	0	8	MQ
672	BK10A_Post2_refinedBins_bin.10	70.73	5.53	2	0	0	0	0	20	MQ
673	LL15A_Pre_refinedBins_bin.72	88.99	5.53	0	0	0	0	0	25	MQ
674	SJ011B_Post2_refinedBins_bin.38	64.84	5.53	1	1	0	0	1	16	MQ
675	SJ074A_Pre_refinedBins_bin.17	73.24	5.53	1	0	0	0	0	11	MQ
676	JH18B_Pre_refinedBins_bin.53	52.78	5.52	0	0	1	0	0	15	MQ
677	LL32C_Pre_refinedBins_bin.17	79.32	5.52	0	0	0	0	0	12	MQ
678	SJ067F_Post2_refinedBins_bin.53	69.27	5.52	1	0	0	0	0	21	MQ
679	UC28_Pre_refinedBins_bin.62	80.51	5.52	2	0	0	0	0	23	MQ
680	LL63B_Pre_refinedBins_bin.21	78.9	5.51	0	0	0	0	0	17	MQ
681	SJ021A_Pre_refinedBins_bin.33	80.93	5.51	1	0	0	0	0	18	MQ
682	BK054C_Pre_refinedBins_bin.55	62.08	5.5	1	0	1	0	0	17	MQ
683	KR033B_Pre_refinedBins_bin.7	61	5.5	0	0	0	0	0	15	MQ
684	SJ010B_Pre_refinedBins_bin.62	67.28	5.5	1	0	0	0	0	14	MQ
685	SJ025C_Post2_refinedBins_bin.88	58.26	5.5	0	0	0	1	0	11	MQ
686	SJ082A_Post2_refinedBins_bin.26	63.54	5.5	2	0	1	0	1	17	MQ
687	SJ087A_Pre_refinedBins_bin.70	74.21	5.5	4	1	1	0	0	21	MQ
688	SJ053A_Pre_refinedBins_bin.12	73.64	5.49	2	0	0	1	0	15	MQ
689	KR048C_Post1_refinedBins_bin.64	56.66	5.48	1	0	0	1	0	12	MQ
690	LL62B_Pre_refinedBins_bin.81	84.67	5.48	2	1	0	0	0	23	MQ
691	SJ024A_Pre_refinedBins_bin.94	96.64	5.48	1	0	0	0	0	19	MQ
692	SJ068B_Post1_refinedBins_bin.18	93.45	5.48	3	0	1	0	0	24	MQ
693	UC22_Pre_refinedBins_bin.28	73.71	5.48	0	0	0	0	0	20	MQ
694	LL31B_Pre_refinedBins_bin.21	99.92	5.47	1	0	0	0	0	21	MQ
695	SJ003C_Post1_refinedBins_bin.39	52.16	5.47	0	0	0	3	0	10	MQ
696	SJ095B_Post1_refinedBins_bin.7	77.01	5.47	0	0	0	1	1	10	MQ
697	UC70_Pre_refinedBins_bin.14	77.89	5.47	2	0	0	1	0	21	MQ
698	KR050D_Pre_refinedBins_bin.2	71.97	5.46	1	0	0	0	0	17	MQ
699	UC51_Pre_refinedBins_bin.43	85.94	5.46	2	0	0	0	0	24	MQ
700	LL55F_Pre_refinedBins_bin.14	100	5.45	2	0	1	0	0	22	MQ
701	SJ016C_Post2_refinedBins_bin.46	67.71	5.45	1	1	1	0	0	14	MQ
702	SJ032A_Post1_refinedBins_bin.3	82.89	5.45	0	0	0	0	0	19	MQ
703	SJ067E_Post1_refinedBins_bin.67	78.23	5.45	0	0	0	0	0	11	MQ
704	SJ002A_Post1_refinedBins_bin.50	97.89	5.443	2	0	0	0	0	25	MQ
705	JJ7A_Post1_refinedBins_bin.66	96.68	5.44	2	0	0	0	0	22	MQ
706	SJ003D_Pre_refinedBins_bin.29	85.55	5.44	0	0	0	0	0	12	MQ
707	LL71C_Pre_refinedBins_bin.43	56.58	5.438	0	0	0	0	1	12	MQ
708	LL8C_Pre_refinedBins_bin.1	75.07	5.43	0	0	0	0	0	10	MQ
709	SJ031C_Pre_refinedBins_bin.13	85.91	5.43	1	0	0	0	0	22	MQ
710	SJ058A_Post1_refinedBins_bin.14	61.24	5.43	1	0	0	0	0	16	MQ
711	KR042C_Post1_refinedBins_bin.27	99.26	5.42	0	0	0	0	0	21	MQ
712	SJ020A_Post2_refinedBins_bin.82	88.43	5.42	0	0	0	0	0	20	MQ
713	UC55_Pre_refinedBins_bin.74	52	5.42	0	0	0	1	0	16	MQ
714	LL2B_Pre_refinedBins_bin.89	70.64	5.4	0	0	0	0	0	16	MQ
715	LL62C_Pre_refinedBins_bin.41	74.02	5.4	1	0	0	1	1	20	MQ
716	LL8C_Pre_refinedBins_bin.51	87.32	5.39	1	0	1	1	0	22	MQ
717	SJ003D_Post1_refinedBins_bin.54	68.64	5.39	0	1	0	0	0	11	MQ
718	SJ031A_Post2_refinedBins_bin.34	76.15	5.39	1	0	0	0	0	13	MQ
719	UC55_Pre_refinedBins_bin.10	55.41	5.39	0	0	0	0	0	12	MQ
720	BK052A_pre_refinedBins_bin.56	70.05	5.38	1	0	0	2	1	16	MQ
721	JQ12A_Pre_refinedBins_bin.63	94.9	5.38	1	0	0	0	0	19	MQ
722	LL64C_Pre_refinedBins_bin.47	83.83	5.38	0	0	0	0	0	23	MQ
723	SJ016E_Post2_refinedBins_bin.94	58.12	5.38	1	0	0	0	0	18	MQ
724	JC23E_Pre_refinedBins_bin.14	85.8	5.37	0	0	1	0	0	17	MQ
725	KR004B_Post2_refinedBins_bin.23	85.09	5.37	1	0	0	0	0	21	MQ
726	JQ3B_Post1_refinedBins_bin.77	50	5.36	0	0	0	0	0	18	MQ
727	KR042E_Pre_refinedBins_bin.34	100	5.36	1	0	1	0	0	24	MQ
728	SJ003D_Pre_refinedBins_bin.50	75.67	5.36	2	0	0	0	0	15	MQ
729	SJ020A_Post1_refinedBins_bin.83	79.84	5.36	0	0	0	1	0	22	MQ
730	BK052A_pre_refinedBins_bin.16	53	5.357	3	0	0	1	0	22	MQ
731	BK60A_Pre_refinedBins_bin.73	50	5.357	1	0	0	1	0	16	MQ
732	JC6B_Post2_refinedBins_bin.1	55.27	5.357	0	0	0	0	0	19	MQ
733	SJ036A_Post1_refinedBins_bin.86	61.76	5.357	1	0	0	1	0	19	MQ
734	SJ047A_Pre_refinedBins_bin.74	64.44	5.357	0	0	0	1	0	13	MQ
735	KR057B_Post1_refinedBins_bin.11	52.46	5.35	3	1	0	0	0	19	MQ
736	SJ003D_Post2_refinedBins_bin.93	89.99	5.35	5	0	0	0	0	23	MQ
737	LL32C_Pre_refinedBins_bin.55	100	5.34	0	0	0	0	0	22	MQ
738	LL53B_Pre_refinedBins_bin.97	74.24	5.34	1	0	0	2	0	22	MQ
739	LL56B_Pre_refinedBins_bin.16	93.69	5.34	0	0	0	0	0	20	MQ
740	SJ016C_post1_refinedBins_bin.17	79.11	5.34	1	0	1	0	0	20	MQ
741	SJ058B_Post1_refinedBins_bin.48	61.57	5.34	0	0	0	0	0	14	MQ
742	SJ091A_Post1_refinedBins_bin.57	81.88	5.34	1	1	1	0	0	19	MQ
743	UC28_Pre_refinedBins_bin.78	75.76	5.34	1	0	0	0	0	17	MQ
744	BK1A_Pre_refinedBins_bin.65	100	5.33	1	0	1	0	0	23	MQ
745	KR067A_Pre_refinedBins_bin.22	79.97	5.33	0	0	0	2	0	18	MQ
746	KR067H_Post2_refinedBins_bin.69	88.8	5.33	0	0	2	0	0	14	MQ
747	SJ092B_Pre_refinedBins_bin.80	83.74	5.33	0	0	0	0	0	20	MQ
748	JQ4B_Post1_refinedBins_bin.58	97.38	5.32	1	2	2	0	0	22	MQ
749	LL34A_Pre_refinedBins_bin.62	90.22	5.32	1	0	0	0	0	17	MQ
750	LL71E_Pre_refinedBins_bin.48	92.16	5.32	0	0	0	2	0	23	MQ
751	SJ023C_Post1_refinedBins_bin.8	80.67	5.32	3	0	1	0	0	20	MQ
752	SJ054B_Post2_refinedBins_bin.47	51.76	5.32	1	0	0	0	0	15	MQ
753	SJ054C_Pre_refinedBins_bin.4	83.04	5.32	0	1	0	0	0	12	MQ
754	SJ095B_pre_refinedBins_bin.43	58.29	5.32	0	0	0	0	0	10	MQ
755	UC26_Pre_refinedBins_bin.57	78.68	5.32	0	0	0	0	0	21	MQ
756	KR042E_Pre_refinedBins_bin.18	54.67	5.31	0	1	0	0	0	8	MQ
757	SJ018B_Post1_refinedBins_bin.44	67.74	5.31	0	0	0	1	0	13	MQ
758	SJ003B_Post1_refinedBins_bin.49	50.97	5.3	0	0	0	0	0	13	MQ
759	LL31G_Pre_refinedBins_bin.43	92.62	5.29	0	0	0	0	0	15	MQ
760	LL71D_Pre_refinedBins_bin.33	53.16	5.29	0	1	4	2	0	11	MQ
761	SJ003C_Post2_refinedBins_bin.60	77.01	5.29	1	0	0	0	0	19	MQ
762	SJ003D_Pre_refinedBins_bin.60	92.25	5.29	5	0	0	0	0	24	MQ
763	SJ016C_Pre_refinedBins_bin.70	85.08	5.29	0	0	0	1	0	22	MQ
764	SJ030B_Post2_refinedBins_bin.5	73.2	5.29	0	0	1	0	1	23	MQ
765	SJ021A_Post1_refinedBins_bin.39	64.31	5.28	3	1	0	0	0	19	MQ
766	BK105A_Post1_refinedBins_bin.47	91.43	5.27	2	0	0	0	0	13	MQ
767	BK16B_Pre_refinedBins_bin.74	72.49	5.27	0	0	1	1	0	14	MQ
768	BK16D_Pre_refinedBins_bin.79	61.88	5.27	1	0	0	1	0	12	MQ
769	KR005C_Pre_refinedBins_bin.100	81.71	5.27	0	0	0	0	0	15	MQ
770	KR032A_Post2_refinedBins_bin.37	87.63	5.27	0	0	0	0	0	18	MQ
771	SJ023A_Pre_refinedBins_bin.35	74.2	5.27	2	0	1	1	0	19	MQ
772	SJ054C_Pre_refinedBins_bin.46	87.46	5.27	0	0	0	0	0	10	MQ
773	UC06_Pre_refinedBins_bin.22	78.55	5.27	0	0	0	0	1	17	MQ
774	BK054C_Post2_refinedBins_bin.52	52.63	5.263	1	1	0	0	0	8	MQ
775	BK8B_Pre_refinedBins_bin.13	53.85	5.263	1	0	0	1	1	24	MQ
776	LL71C_Pre_refinedBins_bin.63	50.23	5.263	3	0	0	0	1	8	MQ
777	SJ091B_Pre_refinedBins_bin.60	59.86	5.263	1	0	0	0	0	10	MQ
778	JC6B_Pre_refinedBins_bin.30	89.3	5.26	1	0	0	0	0	22	MQ
779	JQ4A_Post2_refinedBins_bin.13	86.29	5.26	2	0	0	0	0	21	MQ
780	SJ013A_Post1_refinedBins_bin.3	77.66	5.26	1	0	0	0	0	20	MQ
781	SJ024A_Post2_refinedBins_bin.66	73.79	5.26	0	0	0	1	0	15	MQ
782	KR067G_Post2_refinedBins_bin.74	64.27	5.25	0	0	0	0	0	10	MQ
783	BK057A_Post1_refinedBins_bin.7	57.78	5.24	2	1	0	0	1	15	MQ
784	JK1A_Pre_refinedBins_bin.83	99.16	5.24	2	3	3	1	1	24	MQ
785	JQ2A_Pre_refinedBins_bin.25	80.63	5.24	1	0	0	1	0	20	MQ
786	LL25C_Pre_refinedBins_bin.8	79.55	5.24	0	0	0	0	0	12	MQ
787	LL64A_Pre_refinedBins_bin.63	53	5.24	1	0	1	0	0	18	MQ
788	SJ045E_Post2_refinedBins_bin.78	64.12	5.24	0	0	0	0	0	13	MQ
789	SJ058D_Pre_refinedBins_bin.70	86.84	5.24	3	0	0	0	0	21	MQ
790	SJ078B_Post1_refinedBins_bin.48	80.87	5.24	1	0	0	0	0	9	MQ
791	JH9B_Post1_refinedBins_bin.94	77.96	5.23	3	0	0	0	0	17	MQ
792	BK051A_Post2_refinedBins_bin.13	83.89	5.22	1	0	0	0	0	20	MQ
793	BK14A_Post2_refinedBins_bin.22	86.68	5.22	3	0	0	0	0	22	MQ
794	KR048B_Post1_refinedBins_bin.48	83.15	5.22	2	0	2	0	1	18	MQ
795	LL5A_Pre_refinedBins_bin.93	66.95	5.22	2	0	0	0	0	13	MQ
796	LL5D_Pre_refinedBins_bin.5	81.11	5.22	1	0	0	0	1	16	MQ
797	LL8C_Pre_refinedBins_bin.23	81.09	5.22	3	0	0	0	0	24	MQ
798	SJ027A_Pre_refinedBins_bin.51	95.16	5.22	1	0	0	0	0	23	MQ
799	KR057B_Pre_refinedBins_bin.48	89.98	5.21	1	1	1	3	0	19	MQ
800	LL61A_Pre_refinedBins_bin.72	81.3	5.21	1	0	0	0	0	22	MQ
801	SJ021A_Post2_refinedBins_bin.24	54.09	5.21	0	0	0	1	0	14	MQ
802	SJ031C_Post2_refinedBins_bin.55	83.56	5.21	1	0	0	0	0	22	MQ
803	LL32D_Pre_refinedBins_bin.77	78.07	5.2	1	0	0	1	1	21	MQ
804	LL5A_Pre_refinedBins_bin.2	88.32	5.2	1	0	0	0	1	18	MQ
805	SJ036A_Post1_refinedBins_bin.37	55.14	5.2	0	0	0	0	0	13	MQ
806	SJ091D_Post2_refinedBins_bin.64	89.53	5.2	1	0	0	0	0	22	MQ
807	BK057A_Post1_refinedBins_bin.83	83.06	5.19	0	0	0	1	0	19	MQ
808	KR005C_Pre_refinedBins_bin.51	89.72	5.19	0	0	0	1	0	14	MQ
809	KR067G_Post2_refinedBins_bin.28	79.53	5.19	0	0	0	0	0	18	MQ
810	LL33B_Pre_refinedBins_bin.29	84.53	5.19	0	0	0	0	0	21	MQ
811	LL9E_Pre_refinedBins_bin.93	83.89	5.19	0	0	0	0	0	17	MQ
812	BK14A_Post2_refinedBins_bin.41	72.81	5.18	1	0	0	1	1	11	MQ
813	JK1A_Pre_refinedBins_bin.16	59.1	5.18	0	0	0	0	0	11	MQ
814	LL31F_Pre_refinedBins_bin.45	59.73	5.18	0	0	0	0	0	18	MQ
815	SJ032D_Post1_refinedBins_bin.43	83.8	5.18	0	1	1	0	0	21	MQ
816	SJ067D_Pre_refinedBins_bin.50	73.9	5.18	0	0	0	0	0	10	MQ
817	KR107C_Pre_refinedBins_bin.14	53.76	5.172	3	1	1	0	0	9	MQ
818	SJ058B_Post1_refinedBins_bin.3	53.44	5.172	1	0	0	0	0	11	MQ
819	JH9B_Pre_refinedBins_bin.76	79.31	5.17	1	0	0	0	0	10	MQ
820	LL7B_Pre_refinedBins_bin.10	56.76	5.17	0	0	0	0	0	16	MQ
821	SJ068A_Post2_refinedBins_bin.19	93.22	5.17	2	0	1	1	0	23	MQ
822	UC67_Pre_refinedBins_bin.55	73.88	5.17	0	0	0	0	0	8	MQ
823	BK16E_Pre_refinedBins_bin.14	92.62	5.16	1	1	0	0	0	15	MQ
824	KR067H_Post1_refinedBins_bin.2	89.95	5.16	1	0	0	0	0	19	MQ
825	LL25D_Pre_refinedBins_bin.33	70.95	5.16	0	1	1	0	0	16	MQ
826	LL48A_Pre_refinedBins_bin.59	71	5.16	0	0	0	0	0	15	MQ
827	KR005C_Pre_refinedBins_bin.103	71.78	5.15	1	1	1	0	0	18	MQ
828	KR070B_Pre_refinedBins_bin.12	64.14	5.15	0	0	0	1	0	12	MQ
829	SJ003A_Post1_refinedBins_bin.34	67.52	5.15	2	0	0	0	0	17	MQ
830	SJ023C_Post2_refinedBins_bin.44	87.29	5.15	0	0	0	1	0	15	MQ
831	SJ067E_Post2_refinedBins_bin.18	70.49	5.15	0	0	1	1	0	19	MQ
832	SJ031A_Post1_refinedBins_bin.18	74.91	5.14	0	0	0	0	0	14	MQ
833	BK5A_Pre_refinedBins_bin.8	81.49	5.13	0	0	1	0	0	19	MQ
834	JL19A_Pre_refinedBins_bin.13	71.97	5.13	1	0	0	0	0	9	MQ
835	JQ19C_Post1_refinedBins_bin.1	85.14	5.13	2	0	1	0	0	23	MQ
836	KR042A_Pre_refinedBins_bin.99	87.87	5.13	0	0	0	0	0	20	MQ
837	KR042B_Pre_refinedBins_bin.16	68.65	5.13	1	0	0	1	0	15	MQ
838	LL41B_Pre_refinedBins_bin.73	77.78	5.13	0	0	0	0	0	18	MQ
839	SJ003D_Post1_refinedBins_bin.79	70.46	5.13	0	0	0	0	0	10	MQ
840	SJ076A_Pre_refinedBins_bin.86	84.44	5.13	0	0	0	0	0	23	MQ
841	SJ088A_Pre_refinedBins_bin.47	56.23	5.13	2	0	0	1	1	12	MQ
842	SJ017A_Post2_refinedBins_bin.22	98.04	5.12	0	0	0	3	0	24	MQ
843	SJ017A_Pre_refinedBins_bin.60	55.38	5.12	0	0	0	0	0	5	MQ
844	SJ095A_Pre_refinedBins_bin.30	99.04	5.12	1	0	0	0	0	18	MQ
845	BK62C_Pre_refinedBins_bin.41	82.64	5.11	1	0	1	0	0	11	MQ
846	JQ3B_Pre_refinedBins_bin.53	65.59	5.11	0	0	0	0	0	12	MQ
847	LL4C_Pre_refinedBins_bin.39	85.24	5.11	1	0	0	0	0	12	MQ
848	SJ003D_Post1_refinedBins_bin.38	58.81	5.11	0	0	0	0	0	12	MQ
849	SJ013A_Post1_refinedBins_bin.72	82.61	5.11	1	0	0	0	0	12	MQ
850	JQ4A_Post1_refinedBins_bin.15	85.92	5.1	1	0	0	2	0	15	MQ
851	LL13A_Pre_refinedBins_bin.82	76.85	5.1	0	0	0	0	0	14	MQ
852	SJ053A_Pre_refinedBins_bin.66	74.9	5.1	0	0	0	0	0	17	MQ
853	SJ096A_Pre_refinedBins_bin.59	81.17	5.1	0	0	0	0	0	19	MQ
854	SJ016B_Post1_refinedBins_bin.80	53.97	5.09	0	0	0	1	0	11	MQ
855	SJ025C_Pre_refinedBins_bin.81	62.1	5.09	0	0	0	0	1	9	MQ
856	SJ076C_Pre_refinedBins_bin.48	93.29	5.09	0	0	0	0	0	17	MQ
857	SJ088A_Post2_refinedBins_bin.55	76.07	5.09	0	0	0	1	0	9	MQ
858	SJ074A_Post2_refinedBins_bin.32	85.24	5.08	2	0	0	1	0	14	MQ
859	LL47A_Pre_refinedBins_bin.71	59.44	5.07	2	0	0	0	0	16	MQ
860	BK052A_Post1_refinedBins_bin.11	72.42	5.06	1	0	0	0	1	11	MQ
861	BK16A_Pre_refinedBins_bin.1	96.26	5.05	0	0	0	0	0	17	MQ
862	SJ030B_Post1_refinedBins_bin.4	95.1	5.05	1	0	0	0	0	17	MQ
863	SJ031A_Post2_refinedBins_bin.12	60.75	5.05	1	0	0	0	0	15	MQ
864	SJ091D_Post2_refinedBins_bin.48	98.03	5.05	0	0	0	0	0	22	MQ
865	UC08_Pre_refinedBins_bin.85	66.24	5.05	0	0	0	1	0	13	MQ
866	KR032A_Pre_refinedBins_bin.63	55.44	5.046	0	0	0	0	0	18	MQ
867	KR032A_Post1_refinedBins_bin.102	98.35	5.04	0	0	0	1	1	24	MQ
868	KR091A_Pre_refinedBins_bin.25	87.84	5.04	0	0	1	0	0	22	MQ
869	LL65A_Pre_refinedBins_bin.69	83.76	5.04	1	4	2	1	0	14	MQ
870	SJ018A_Pre_refinedBins_bin.27	78.35	5.04	1	0	0	1	0	18	MQ
871	SJ033C_Post1_refinedBins_bin.50	83.62	5.04	1	0	0	1	1	17	MQ
872	UC22_Pre_refinedBins_bin.67	51.26	5.04	1	0	0	0	1	16	MQ
873	LL14A_Pre_refinedBins_bin.49	75.43	5.03	2	0	0	0	0	20	MQ
874	SJ011B_Post1_refinedBins_bin.58	82.27	5.03	1	0	0	0	0	20	MQ
875	SJ032D_Post1_refinedBins_bin.11	64.62	5.03	0	0	0	0	0	19	MQ
876	SJ054C_Post1_refinedBins_bin.1	84.63	5.03	0	0	0	0	0	11	MQ
877	UC49_Pre_refinedBins_bin.86	70.32	5.03	0	0	0	0	0	13	MQ
878	LL62B_Pre_refinedBins_bin.46	52.87	5.023	2	0	0	0	0	20	MQ
879	KR032A_Post1_refinedBins_bin.57	77.96	5.02	0	0	0	0	0	17	MQ
880	KR032A_Post1_refinedBins_bin.72	54.73	5.02	2	0	1	1	0	12	MQ
881	KR067E_Pre_refinedBins_bin.34	89.14	5.02	1	0	0	0	0	23	MQ
882	KR099A_Pre_refinedBins_bin.114	90.21	5.02	1	0	0	0	0	21	MQ
883	SJ016D_Pre_refinedBins_bin.81	83.43	5.02	0	0	0	1	0	13	MQ
884	UC11_Pre_refinedBins_bin.22	99.97	5.02	2	0	0	0	1	18	MQ
885	JL19B_Pre_refinedBins_bin.58	54.35	5.016	3	0	0	0	0	6	MQ
886	BK051A_pre_refinedBins_bin.42	97.17	5.01	0	0	0	0	0	20	MQ
887	BK60A_Post1_refinedBins_bin.67	91.22	5.01	1	0	0	0	0	23	MQ
888	JQ12B_Post1_refinedBins_bin.4	74.57	5.01	0	0	0	1	0	21	MQ
889	KR067A_Post1_refinedBins_bin.34	80.45	5.01	0	0	0	0	0	23	MQ
890	UC20_Pre_refinedBins_bin.19	64.3	5.01	3	1	2	0	0	15	MQ
891	JL23A_Post2_refinedBins_bin.14	97.1	5	0	0	0	1	1	23	MQ
892	JL25B_Post1_refinedBins_bin.15	85.86	5	0	0	0	0	0	23	MQ
893	SJ010B_Pre_refinedBins_bin.35	52.01	5	0	0	0	0	0	9	MQ
894	BK29C_Pre_refinedBins_bin.59	66.01	4.99	0	0	0	0	0	8	MQ
895	KR004E_Post2_refinedBins_bin.87	61.68	4.99	1	0	0	0	0	13	MQ
896	KR067A_Pre_refinedBins_bin.45	78.78	4.99	2	0	0	0	0	21	MQ
897	SJ003C_Post1_refinedBins_bin.70	96.97	4.99	1	0	0	0	1	22	NC
898	SJ010C_Pre_refinedBins_bin.49	76.41	4.99	0	1	0	0	0	9	MQ
899	UC54_Pre_refinedBins_bin.16	96.74	4.99	0	0	1	0	0	22	NC
900	SJ058F_Post2_refinedBins_bin.71	91.46	4.98	0	0	1	0	0	22	NC
901	SJ068B_Post1_refinedBins_bin.26	100	4.98	2	1	1	1	1	25	HQ
902	SJ086A_Post2_refinedBins_bin.18	99.97	4.98	1	0	0	1	0	23	NC
903	SJ088B_Post1_refinedBins_bin.12	90.71	4.98	0	0	0	0	0	22	NC
904	UC47_Pre_refinedBins_bin.44	99.99	4.98	2	0	1	0	0	22	NC
905	BK16A_Pre_refinedBins_bin.42	98.76	4.97	0	0	0	0	0	25	NC
906	BK62B_Post2_refinedBins_bin.10	87.74	4.97	1	0	0	0	0	20	MQ
907	SJ017A_Post1_refinedBins_bin.14	87.66	4.97	0	0	0	0	0	15	MQ
908	SJ031C_Post1_refinedBins_bin.70	87.51	4.97	0	0	0	0	0	18	MQ
909	UC48_Pre_refinedBins_bin.6	73.03	4.97	0	0	1	1	0	13	MQ
910	KR067B_Pre_refinedBins_bin.65	74.65	4.96	0	1	0	1	0	13	MQ
911	KR067G_Post1_refinedBins_bin.43	84.38	4.96	1	0	0	0	0	20	MQ
912	UC68_Pre_refinedBins_bin.109	86.91	4.96	0	0	0	0	0	14	MQ
913	KR042E_Pre_refinedBins_bin.47	87.58	4.95	1	0	0	0	0	16	MQ
914	KR048C_Post1_refinedBins_bin.21	68.51	4.95	2	0	0	0	0	19	MQ
915	LL12C_Pre_refinedBins_bin.48	93.44	4.95	1	0	0	1	0	21	NC
916	SJ016D_Post2_refinedBins_bin.7	66.11	4.95	0	1	1	0	0	10	MQ
917	SJ031C_Post1_refinedBins_bin.33	91.84	4.95	2	0	1	1	0	11	NC
918	SJ091A_Post2_refinedBins_bin.9	69.19	4.95	0	0	0	0	0	7	MQ
919	UC45_Pre_refinedBins_bin.41	65.89	4.95	1	0	0	0	0	15	MQ
920	SJ054A_Post2_refinedBins_bin.18	99.62	4.938	1	0	0	0	0	22	NC
921	KR056A_Post1_refinedBins_bin.71	51.05	4.93	0	0	0	1	0	12	MQ
922	LL2C_Pre_refinedBins_bin.60	80.08	4.93	2	0	0	0	0	11	MQ
923	SJ012A_Post1_refinedBins_bin.2	85.13	4.93	2	0	0	0	0	20	MQ
924	UC25_Pre_refinedBins_bin.12	99.89	4.93	1	0	0	0	0	23	NC
925	JL25B_Post2_refinedBins_bin.6	82.94	4.92	1	1	0	1	0	17	MQ
926	KR099A_Pre_refinedBins_bin.42	76.41	4.92	0	0	0	0	0	20	MQ
927	LL31G_Pre_refinedBins_bin.41	90.26	4.92	2	1	0	0	0	24	NC
928	SJ082A_Post2_refinedBins_bin.5	63.85	4.92	1	0	0	0	0	17	MQ
929	UC73_Pre_refinedBins_bin.41	63.42	4.92	0	0	2	0	3	13	MQ
930	SJ067G_Post1_refinedBins_bin.85	99.91	4.91	0	0	0	0	0	19	NC
931	BK60A_Pre_refinedBins_bin.90	85.53	4.9	0	0	0	1	0	17	MQ
932	KR048B_Post2_refinedBins_bin.41	70.76	4.9	0	0	0	0	0	12	MQ
933	KR048C_Post1_refinedBins_bin.92	92.18	4.9	1	1	1	2	1	20	HQ
934	BK11A_Post1_refinedBins_bin.49	84.57	4.89	1	0	1	0	0	24	MQ
935	KR026F_Pre_refinedBins_bin.83	77.49	4.89	0	0	0	1	0	21	MQ
936	LL1C_Pre_refinedBins_bin.60	82.7	4.89	0	0	0	2	0	11	MQ
937	LL9D_Pre_refinedBins_bin.58	99.99	4.89	0	0	0	1	0	24	NC
938	SJ004D_Pre_refinedBins_bin.93	92.92	4.89	0	0	0	0	0	17	NC
939	SJ030B_Post2_refinedBins_bin.15	80.12	4.89	1	0	0	1	0	15	MQ
940	SJ058F_Post2_refinedBins_bin.22	97.03	4.89	0	0	0	0	0	17	NC
941	BK63A_Post1_refinedBins_bin.42	63.42	4.88	1	0	0	0	0	10	MQ
942	JC23C_Post1_refinedBins_bin.65	60.16	4.88	0	0	0	0	0	15	MQ
943	LL51E_Pre_refinedBins_bin.1	92.89	4.88	3	0	1	0	0	22	NC
944	SJ016E_Pre_refinedBins_bin.73	99.76	4.88	0	1	0	0	1	20	NC
945	KR032C_Pre_refinedBins_bin.41	58.71	4.87	0	0	0	0	0	17	MQ
946	SJ021A_Pre_refinedBins_bin.3	52	4.87	0	0	0	0	0	11	MQ
947	SJ040A_Pre_refinedBins_bin.31	96.84	4.87	3	0	1	0	0	23	NC
948	SJ045A_Pre_refinedBins_bin.31	82.1	4.87	1	0	0	1	0	17	MQ
949	SJ047A_Post2_refinedBins_bin.42	55.08	4.87	0	0	0	0	0	12	MQ
950	KR030D_Pre_refinedBins_bin.99	90.87	4.86	2	0	0	0	0	25	NC
951	SJ016C_Post2_refinedBins_bin.34	99.5	4.86	4	1	1	0	0	22	NC
952	SJ024B_Post2_refinedBins_bin.39	96.22	4.86	1	0	0	0	0	18	NC
953	SJ031C_Post1_refinedBins_bin.51	85.46	4.86	1	0	0	1	0	23	MQ
954	SJ054B_Pre_refinedBins_bin.4	95.04	4.86	1	0	0	0	0	24	NC
955	SJ086A_Post2_refinedBins_bin.41	50.85	4.86	2	0	0	0	0	12	MQ
956	SJ089B_Post2_refinedBins_bin.49	76.1	4.86	0	0	0	1	0	15	MQ
957	KR042B_Pre_refinedBins_bin.41	100	4.85	0	1	1	0	0	19	NC
958	LL4C_Pre_refinedBins_bin.17	90.96	4.85	1	0	0	0	0	14	NC
959	LL53A_Pre_refinedBins_bin.58	100	4.85	0	0	0	0	2	21	NC
960	SJ078C_Pre_refinedBins_bin.55	70.43	4.85	1	0	0	0	1	15	MQ
961	UC08_Pre_refinedBins_bin.137	100	4.85	1	0	2	0	0	24	NC
962	BK054A_Pre_refinedBins_bin.74	80.44	4.84	0	0	0	0	0	15	MQ
963	BK29C_Pre_refinedBins_bin.12	87.07	4.84	0	0	1	0	0	15	MQ
964	LL6A_Pre_refinedBins_bin.67	69.27	4.84	3	0	0	0	0	13	MQ
965	BK13A_Post2_refinedBins_bin.16	72.81	4.83	0	0	0	0	0	16	MQ
966	LL24B_Pre_refinedBins_bin.5	64.54	4.83	1	1	0	0	0	10	MQ
967	LL34A_Pre_refinedBins_bin.15	87.52	4.83	1	0	0	0	0	13	MQ
968	SJ025B_Post1_refinedBins_bin.76	84.09	4.83	0	0	0	0	0	21	MQ
969	SJ032A_Pre_refinedBins_bin.54	78.92	4.83	0	0	0	0	0	9	MQ
970	LL4D_Pre_refinedBins_bin.40	72.19	4.82	1	0	0	0	0	21	MQ
971	LL51C_Pre_refinedBins_bin.122	95.87	4.82	1	0	0	0	0	13	NC
972	LL64B_Pre_refinedBins_bin.22	80.72	4.82	1	0	1	0	0	24	MQ
973	SJ040A_Pre_refinedBins_bin.35	99.99	4.82	0	0	0	0	0	24	NC
974	SJ089A_Post1_refinedBins_bin.48	92.92	4.82	0	0	0	0	0	24	NC
975	LL54D_Pre_refinedBins_bin.43	84	4.81	1	1	1	0	0	18	MQ
976	SJ012A_Post1_refinedBins_bin.94	54.14	4.81	1	1	2	1	1	5	MQ
977	SJ023D_Post2_refinedBins_bin.40	89.43	4.81	0	1	0	0	0	18	MQ
978	SJ040A_Pre_refinedBins_bin.1	68.2	4.81	0	0	0	0	0	9	MQ
979	SJ089B_Post1_refinedBins_bin.5	88.72	4.81	0	0	0	0	1	13	MQ
980	UC16_Pre_refinedBins_bin.8	100	4.81	2	1	1	2	2	25	HQ
981	BK54B_Pre_refinedBins_bin.32	86	4.8	0	0	0	0	0	18	MQ
982	LL31E_Pre_refinedBins_bin.12	84.54	4.8	1	0	0	0	0	18	MQ
983	LL65D_Pre_refinedBins_bin.92	77.63	4.8	2	0	0	1	0	17	MQ
984	SJ024B_Post2_refinedBins_bin.64	89.03	4.8	3	0	0	2	0	23	MQ
985	SJ078B_Post1_refinedBins_bin.53	72	4.8	0	0	0	0	0	16	MQ
986	SJ076A_Pre_refinedBins_bin.77	63.78	4.798	1	0	0	0	0	7	MQ
987	UC22_Pre_refinedBins_bin.20	85.7	4.79	0	0	0	0	1	19	MQ
988	JL19A_Post1_refinedBins_bin.80	96.56	4.78	2	0	0	0	0	14	NC
989	LL63B_Pre_refinedBins_bin.34	59.95	4.78	0	1	0	0	0	9	MQ
990	BK105A_Post1_refinedBins_bin.25	93.3	4.77	0	1	1	0	0	21	NC
991	JQ3B_Pre_refinedBins_bin.15	85.33	4.77	1	0	0	0	0	14	MQ
992	KR050D_Pre_refinedBins_bin.79	71.1	4.77	1	0	0	1	1	13	MQ
993	KR059B_Pre_refinedBins_bin.54	82.39	4.77	0	0	0	1	1	13	MQ
994	LL53A_Pre_refinedBins_bin.59	70.8	4.77	0	0	2	0	0	8	MQ
995	SJ032D_Post2_refinedBins_bin.28	76.16	4.77	1	1	0	0	0	13	MQ
996	SJ054B_Post2_refinedBins_bin.75	58.86	4.77	2	0	0	0	1	18	MQ
997	SJ087A_Pre_refinedBins_bin.65	58.33	4.77	0	0	0	2	0	13	MQ
998	SJ088A_Post1_refinedBins_bin.22	74.28	4.77	0	0	0	0	0	15	MQ
999	BK052A_Post2_refinedBins_bin.78	93.83	4.76	1	0	0	0	0	22	NC
1000	BK21A_Post1_refinedBins_bin.47	96.79	4.76	5	1	0	1	0	23	HQ
1001	KR032A_Pre_refinedBins_bin.3	99.92	4.76	0	0	0	0	0	15	NC
1002	LL2C_Pre_refinedBins_bin.69	94.35	4.76	0	0	0	0	0	19	NC
1003	SJ002A_Post2_refinedBins_bin.29	86.88	4.75	2	0	0	0	0	18	MQ
1004	SJ076C_Pre_refinedBins_bin.54	78.42	4.75	2	0	0	0	0	21	MQ
1005	SJ089B_Pre_refinedBins_bin.54	62.87	4.75	1	0	0	0	0	20	MQ
1006	LL15A_Pre_refinedBins_bin.27	57.29	4.74	0	0	0	0	0	11	MQ
1007	SJ021B_Post2_refinedBins_bin.63	93.15	4.74	1	1	1	1	0	22	HQ
1008	SJ031D_Post2_refinedBins_bin.26	99.97	4.74	0	3	2	2	1	16	NC
1009	SJ036A_Pre_refinedBins_bin.24	67.37	4.74	1	0	0	0	0	21	MQ
1010	SJ040A_Pre_refinedBins_bin.14	92.43	4.74	0	0	0	0	1	14	NC
1011	JH9B_Post2_refinedBins_bin.57	87.05	4.73	1	0	0	2	2	24	MQ
1012	SJ016A_Post2_refinedBins_bin.27	76.64	4.73	0	0	0	0	0	13	MQ
1013	SJ016C_Pre_refinedBins_bin.26	53.21	4.73	0	0	0	0	0	8	MQ
1014	UC40_Pre_refinedBins_bin.24	81.75	4.73	0	0	0	0	0	12	MQ
1015	UC66_Pre_refinedBins_bin.58	92.12	4.73	0	0	0	0	0	19	NC
1016	SJ013A_Post2_refinedBins_bin.34	99.16	4.71	1	0	0	1	0	24	NC
1017	SJ032D_Post1_refinedBins_bin.44	82.44	4.71	0	0	0	0	0	16	MQ
1018	SJ045A_Pre_refinedBins_bin.54	92.54	4.71	0	0	0	0	2	21	NC
1019	SJ045E_Post2_refinedBins_bin.60	93.46	4.71	2	0	0	0	0	21	NC
1020	SJ047A_Post1_refinedBins_bin.28	76.56	4.71	0	0	0	0	0	14	MQ
1021	SJ091A_Pre_refinedBins_bin.17	84.39	4.71	3	0	0	0	0	23	MQ
1022	SJ091B_Post2_refinedBins_bin.4	88.88	4.71	0	3	2	1	1	17	MQ
1023	KR048C_Post1_refinedBins_bin.89	98.27	4.7	1	0	0	0	0	21	NC
1024	LL64C_Pre_refinedBins_bin.63	99.95	4.7	2	0	0	1	0	23	NC
1025	SJ016E_Post2_refinedBins_bin.74	85.15	4.7	0	0	1	0	0	19	MQ
1026	SJ067D_Pre_refinedBins_bin.66	100	4.7	1	0	0	1	0	24	NC
1027	UC42_Pre_refinedBins_bin.11	98.95	4.7	1	1	0	1	0	26	HQ
1028	UC49_Pre_refinedBins_bin.108	90.57	4.7	4	0	0	0	0	18	NC
1029	BK5B_Pre_refinedBins_bin.49	76.65	4.69	0	0	0	1	0	23	MQ
1030	KR067G_Pre_refinedBins_bin.13	78.64	4.69	0	0	1	0	0	17	MQ
1031	LL51C_Pre_refinedBins_bin.18	77.33	4.69	0	0	0	0	1	15	MQ
1032	LL65C_Pre_refinedBins_bin.13	98.98	4.69	2	0	0	0	0	19	NC
1033	SJ025D_Post1_refinedBins_bin.2	71.93	4.69	0	0	0	1	0	15	MQ
1034	BK29A_Pre_refinedBins_bin.1	83.68	4.68	0	0	0	0	0	9	MQ
1035	KR048B_Post1_refinedBins_bin.61	76.37	4.68	1	0	0	1	0	11	MQ
1036	KR095A_Pre_refinedBins_bin.23	77.69	4.68	0	0	0	0	0	17	MQ
1037	LL12C_Pre_refinedBins_bin.6	87.26	4.68	0	0	0	1	0	24	MQ
1038	SJ020A_Post1_refinedBins_bin.72	99.73	4.68	2	0	0	0	0	19	NC
1039	SJ048A_Post2_refinedBins_bin.79	79.72	4.68	0	0	0	1	0	18	MQ
1040	SJ058C_Post2_refinedBins_bin.64	87.06	4.68	1	0	0	0	1	13	MQ
1041	SJ067A_Post2_refinedBins_bin.54	72.37	4.68	0	0	0	0	0	15	MQ
1042	SJ074A_Post2_refinedBins_bin.63	72.09	4.68	1	1	0	0	0	14	MQ
1043	LL14A_Pre_refinedBins_bin.45	82.35	4.67	0	0	0	0	0	17	MQ
1044	LL6B_Pre_refinedBins_bin.8	81.53	4.67	0	1	1	1	1	12	MQ
1045	LL6C_Pre_refinedBins_bin.9	83.38	4.67	0	0	0	1	0	16	MQ
1046	SJ076B_Pre_refinedBins_bin.19	81.2	4.67	0	0	1	0	0	22	MQ
1047	UC22_Pre_refinedBins_bin.95	87.23	4.67	1	0	0	0	0	14	MQ
1048	BK8C_Pre_refinedBins_bin.14	84.79	4.66	1	0	0	0	0	16	MQ
1049	LL54B_Pre_refinedBins_bin.18	61.12	4.66	0	0	0	0	0	17	MQ
1050	LL63B_Pre_refinedBins_bin.92	67.17	4.66	0	0	0	1	0	13	MQ
1051	SJ076C_Pre_refinedBins_bin.64	84.62	4.66	0	0	0	0	0	20	MQ
1052	JH9B_Post1_refinedBins_bin.18	70.66	4.65	0	0	0	0	0	10	MQ
1053	JK14A_Pre_refinedBins_bin.11	70.23	4.65	3	0	0	0	0	22	MQ
1054	KR050D_Pre_refinedBins_bin.22	67.47	4.65	4	0	0	0	0	15	MQ
1055	KR067G_Pre_refinedBins_bin.77	64.61	4.65	1	0	0	0	0	16	MQ
1056	SJ025B_Pre_refinedBins_bin.67	66.32	4.65	1	0	0	0	0	13	MQ
1057	UC44_Pre_refinedBins_bin.73	55.46	4.65	0	0	0	1	0	20	MQ
1058	UC57_Pre_refinedBins_bin.16	88.14	4.65	0	0	0	2	2	18	MQ
1059	BK63A_Pre_refinedBins_bin.3	59.94	4.641	0	0	0	0	0	8	MQ
1060	BK16E_Pre_refinedBins_bin.5	98.55	4.64	0	0	0	0	0	24	NC
1061	BK18B_Pre_refinedBins_bin.5	81.81	4.64	0	0	0	1	0	16	MQ
1062	LL31D_Pre_refinedBins_bin.9	75.22	4.64	0	0	0	0	0	17	MQ
1063	SJ010C_Pre_refinedBins_bin.33	57.16	4.64	0	0	0	0	0	10	MQ
1064	SJ025C_Post1_refinedBins_bin.43	86.52	4.64	1	0	0	1	0	21	MQ
1065	SJ024A_Post2_refinedBins_bin.41	69.75	4.63	0	0	0	1	0	21	MQ
1066	SJ067D_Pre_refinedBins_bin.23	81.38	4.63	1	0	0	1	0	21	MQ
1067	SJ095A_Pre_refinedBins_bin.18	82.98	4.63	1	0	0	1	0	20	MQ
1068	UC16_Pre_refinedBins_bin.4	74.49	4.63	0	1	0	1	0	17	MQ
1069	BK13A_Post1_refinedBins_bin.70	84.47	4.62	1	1	0	0	0	15	MQ
1070	JC3B_Pre_refinedBins_bin.30	65.15	4.62	1	0	0	0	0	16	MQ
1071	JJ7A_Post2_refinedBins_bin.8	83.4	4.62	0	0	0	0	0	19	MQ
1072	SJ031A_Post1_refinedBins_bin.58	84.25	4.62	2	0	0	0	0	18	MQ
1073	SJ067A_Post1_refinedBins_bin.10	58.52	4.62	1	0	0	0	0	11	MQ
1074	SJ067F_Post1_refinedBins_bin.11	92.26	4.62	0	1	1	0	0	16	NC
1075	LL65D_Pre_refinedBins_bin.6	80.7	4.61	1	0	0	0	0	20	MQ
1076	LL70B_Pre_refinedBins_bin.22	96.47	4.61	0	0	1	0	0	15	NC
1077	SJ067G_Pre_refinedBins_bin.10	71.2	4.61	0	0	1	0	0	14	MQ
1078	SJ095D_Pre_refinedBins_bin.31	85.29	4.61	0	0	0	0	0	12	MQ
1079	UC47_Pre_refinedBins_bin.19	85.84	4.61	0	0	0	0	0	21	MQ
1080	LL34A_Pre_refinedBins_bin.57	72.91	4.6	1	0	0	0	0	17	MQ
1081	SJ054C_Pre_refinedBins_bin.38	84.84	4.6	6	0	0	0	0	22	MQ
1082	JH9B_Pre_refinedBins_bin.87	68.5	4.59	0	0	1	0	1	15	MQ
1083	KR069D_Pre_refinedBins_bin.8	68.14	4.59	0	0	0	0	0	16	MQ
1084	SJ045D_Post2_refinedBins_bin.42	90.79	4.59	0	0	0	0	0	17	NC
1085	SJ067E_Post2_refinedBins_bin.64	82.46	4.59	0	0	0	1	2	19	MQ
1086	SJ072B_Post2_refinedBins_bin.28	90.69	4.59	0	0	0	0	0	19	NC
1087	SJ088A_Post2_refinedBins_bin.103	98.92	4.59	0	0	0	0	0	22	NC
1088	BK54B_Pre_refinedBins_bin.52	75.29	4.58	1	2	0	0	0	14	MQ
1089	BK62B_Post1_refinedBins_bin.55	58.04	4.58	0	0	0	0	0	12	MQ
1090	SJ020A_Post1_refinedBins_bin.65	80.55	4.58	1	0	1	0	0	17	MQ
1091	SJ030B_Pre_refinedBins_bin.69	84.18	4.58	2	0	0	0	0	17	MQ
1092	SJ082A_Post1_refinedBins_bin.63	74.2	4.58	0	0	0	1	0	19	MQ
1093	LL41B_Pre_refinedBins_bin.31	78.49	4.57	1	0	0	1	0	15	MQ
1094	LL64A_Pre_refinedBins_bin.5	85.99	4.57	2	0	0	0	0	13	MQ
1095	SJ032D_Post1_refinedBins_bin.30	76.75	4.57	0	0	0	0	0	10	MQ
1096	SJ089B_Post1_refinedBins_bin.85	59.86	4.57	1	0	0	0	0	14	MQ
1097	BK057A_Post2_refinedBins_bin.48	75.64	4.56	0	0	0	0	0	20	MQ
1098	JQ3B_Post1_refinedBins_bin.19	67.63	4.56	0	0	0	1	0	13	MQ
1099	UC11_Pre_refinedBins_bin.28	65.17	4.56	2	0	0	1	0	10	MQ
1100	LL25D_Pre_refinedBins_bin.73	88.48	4.55	0	2	0	1	0	19	MQ
1101	SJ047A_Post2_refinedBins_bin.3	74.35	4.55	0	0	0	0	0	22	MQ
1102	SJ086B_Post2_refinedBins_bin.28	70.04	4.55	2	1	1	0	0	10	MQ
1103	BK16E_Pre_refinedBins_bin.33	51.8	4.54	0	0	0	1	0	12	MQ
1104	JQ4A_Pre_refinedBins_bin.61	86.28	4.54	0	0	0	1	0	24	MQ
1105	LL9B_Pre_refinedBins_bin.42	60	4.54	0	0	0	1	0	21	MQ
1106	SJ025C_Post1_refinedBins_bin.28	74.54	4.54	1	0	0	1	0	17	MQ
1107	SJ047A_Post1_refinedBins_bin.64	64.64	4.54	0	0	0	0	0	18	MQ
1108	SJ091D_Post2_refinedBins_bin.13	69.02	4.54	0	0	0	0	0	16	MQ
1109	JH18B_Pre_refinedBins_bin.67	78.09	4.53	1	0	1	0	0	19	MQ
1110	LL31B_Pre_refinedBins_bin.19	89.34	4.53	2	0	1	0	0	19	MQ
1111	SJ003C_Post1_refinedBins_bin.8	82.23	4.53	0	0	0	0	0	16	MQ
1112	SJ025D_Pre_refinedBins_bin.13	50.94	4.53	1	0	0	0	0	11	MQ
1113	LL62B_Pre_refinedBins_bin.16	70.6	4.52	0	0	0	1	0	18	MQ
1114	SJ032D_Post2_refinedBins_bin.1	85.33	4.52	1	0	1	0	0	13	MQ
1115	SJ091B_Post2_refinedBins_bin.22	78.2	4.52	1	0	1	0	0	16	MQ
1116	BK21A_Pre_refinedBins_bin.4	67.17	4.5	2	0	0	0	0	12	MQ
1117	BK5B_Pre_refinedBins_bin.56	80.12	4.5	0	0	0	0	0	13	MQ
1118	LL48A_Pre_refinedBins_bin.70	97.53	4.5	1	0	0	1	0	19	NC
1119	SJ025C_Post2_refinedBins_bin.13	66.37	4.5	0	0	0	2	0	19	MQ
1120	JK1A_Pre_refinedBins_bin.25	91.61	4.49	0	0	0	0	1	24	NC
1121	KR026D_Pre_refinedBins_bin.86	69.5	4.49	1	0	0	0	0	19	MQ
1122	KR067H_Post1_refinedBins_bin.1	100	4.49	1	0	0	0	0	24	NC
1123	LL22A_Pre_refinedBins_bin.27	66.33	4.49	0	0	0	0	1	12	MQ
1124	LL24A_Pre_refinedBins_bin.71	89.45	4.49	1	0	0	2	0	18	MQ
1125	LL42D_Pre_refinedBins_bin.87	97.21	4.49	1	0	0	0	0	22	NC
1126	LL6B_Pre_refinedBins_bin.55	72.01	4.49	0	0	0	0	0	7	MQ
1127	SJ089B_Pre_refinedBins_bin.63	70.5	4.49	0	1	1	0	0	17	MQ
1128	UC05_Pre_refinedBins_bin.2	80.45	4.49	0	0	0	1	0	16	MQ
1129	BK054C_Post1_refinedBins_bin.26	95.59	4.48	3	0	0	2	0	22	NC
1130	LL64B_Pre_refinedBins_bin.62	72.11	4.48	0	0	0	0	0	14	MQ
1131	LL8C_Pre_refinedBins_bin.27	99.85	4.48	0	1	0	0	0	25	NC
1132	BK054C_Post2_refinedBins_bin.4	99.94	4.47	1	0	1	0	0	25	NC
1133	BK5B_Pre_refinedBins_bin.9	79.4	4.47	0	0	1	0	0	22	MQ
1134	LL42A_Pre_refinedBins_bin.42	61.14	4.47	1	0	0	0	0	11	MQ
1135	SJ033A_Post1_refinedBins_bin.8	85.94	4.47	0	0	0	0	0	20	MQ
1136	SJ040A_Pre_refinedBins_bin.48	69.9	4.47	0	0	0	0	0	19	MQ
1137	JK14A_Pre_refinedBins_bin.24	52.97	4.46	0	0	0	1	0	5	MQ
1138	KR004E_Post1_refinedBins_bin.2	87.14	4.46	0	0	0	1	0	15	MQ
1139	KR067G_Pre_refinedBins_bin.93	60.26	4.46	0	0	0	0	0	10	MQ
1140	LL65D_Pre_refinedBins_bin.30	63.69	4.46	2	0	0	0	0	12	MQ
1141	SJ024A_Post1_refinedBins_bin.29	95.3	4.46	1	0	0	0	0	18	NC
1142	UC61_Pre_refinedBins_bin.81	90.35	4.46	1	0	0	1	0	25	NC
1143	LL64A_Pre_refinedBins_bin.80	81.02	4.45	0	0	0	0	0	15	MQ
1144	SJ086A_Post2_refinedBins_bin.56	70.48	4.45	1	0	1	0	0	14	MQ
1145	SJ088B_Post1_refinedBins_bin.9	63.9	4.45	1	0	0	0	0	19	MQ
1146	SJ091A_Post1_refinedBins_bin.101	58.09	4.45	1	0	0	0	0	15	MQ
1147	SJ095B_Post1_refinedBins_bin.64	93.31	4.45	2	0	0	0	0	18	NC
1148	UC11_Pre_refinedBins_bin.72	81.63	4.45	4	0	0	0	0	17	MQ
1149	JC23E_Post1_refinedBins_bin.33	67.97	4.44	1	0	0	0	0	15	MQ
1150	JQ4A_Post2_refinedBins_bin.16	79.66	4.44	0	0	0	0	0	14	MQ
1151	KR004E_Post1_refinedBins_bin.77	65.57	4.44	1	0	0	0	0	17	MQ
1152	KR067A_Pre_refinedBins_bin.73	87.27	4.44	0	0	0	1	0	19	MQ
1153	SJ004D_Pre_refinedBins_bin.60	73.88	4.44	1	0	0	1	1	18	MQ
1154	SJ032B_Pre_refinedBins_bin.57	93.06	4.44	1	0	0	0	0	19	NC
1155	SJ073B_Pre_refinedBins_bin.12	76.26	4.44	0	0	0	0	0	19	MQ
1156	SJ088B_Post1_refinedBins_bin.63	82.16	4.44	1	0	0	1	0	21	MQ
1157	KR067E_Post1_refinedBins_bin.57	71.82	4.43	0	0	0	0	0	21	MQ
1158	SJ016C_post1_refinedBins_bin.62	90.4	4.43	0	1	0	0	0	19	NC
1159	SJ062A_Pre_refinedBins_bin.10	55.61	4.43	2	0	1	0	0	9	MQ
1160	UC68_Pre_refinedBins_bin.33	80.86	4.43	2	0	0	0	0	20	MQ
1161	BK22A_Pre_refinedBins_bin.28	97.96	4.42	2	0	0	0	0	22	NC
1162	JH12B_Post2_refinedBins_bin.28	72.95	4.42	1	0	0	0	0	17	MQ
1163	JK14C_Pre_refinedBins_bin.43	74.04	4.42	0	0	2	0	0	10	MQ
1164	SJ018A_Post2_refinedBins_bin.39	84.06	4.42	0	0	0	0	0	22	MQ
1165	SJ045D_Post2_refinedBins_bin.14	94.9	4.42	1	0	0	1	0	22	NC
1166	BK051A_Post2_refinedBins_bin.45	63.94	4.41	0	0	0	1	0	18	MQ
1167	BK61A_Pre_refinedBins_bin.64	82.23	4.41	1	0	0	0	0	23	MQ
1168	LL2B_Pre_refinedBins_bin.91	75.93	4.41	0	1	0	0	0	16	MQ
1169	JH9B_Pre_refinedBins_bin.80	62.84	4.4	2	0	0	0	0	15	MQ
1170	KR004B_Pre_refinedBins_bin.18	68.47	4.4	0	0	0	0	0	7	MQ
1171	KR067A_Pre_refinedBins_bin.57	75.63	4.4	0	0	0	0	0	21	MQ
1172	KR091A_Pre_refinedBins_bin.3	86.6	4.4	0	0	0	0	0	19	MQ
1173	LL61A_Pre_refinedBins_bin.56	71.73	4.4	0	0	0	1	1	10	MQ
1174	SJ025C_Post2_refinedBins_bin.55	81.88	4.4	1	0	0	0	0	16	MQ
1175	SJ033C_Post1_refinedBins_bin.16	70.64	4.4	2	0	0	0	0	11	MQ
1176	SJ045D_Post1_refinedBins_bin.32	71.52	4.4	0	0	0	2	0	19	MQ
1177	SJ062B_Pre_refinedBins_bin.81	75.73	4.4	1	1	1	1	0	17	MQ
1178	SJ069B_Post2_refinedBins_bin.16	81.93	4.4	1	0	0	0	0	22	MQ
1179	UC30_Pre_refinedBins_bin.45	92.55	4.4	0	0	0	0	0	24	NC
1180	JL25B_Post2_refinedBins_bin.80	94.54	4.39	1	0	0	0	0	15	NC
1181	KR067E_Post1_refinedBins_bin.42	73.83	4.39	0	0	0	0	0	18	MQ
1182	SJ016B_Post1_refinedBins_bin.88	56.6	4.39	2	0	0	1	0	9	MQ
1183	SJ067B_Post1_refinedBins_bin.60	85.77	4.39	0	0	0	2	1	18	MQ
1184	UC57_Pre_refinedBins_bin.19	65.51	4.388	0	1	1	0	0	11	MQ
1185	SJ045A_Post2_refinedBins_bin.67	82.56	4.38	0	0	1	0	1	19	MQ
1186	SJ091C_Post1_refinedBins_bin.22	98.82	4.38	1	0	0	0	0	23	NC
1187	SJ091D_Pre_refinedBins_bin.10	81.28	4.38	2	0	0	1	0	20	MQ
1188	SJ076A_Pre_refinedBins_bin.39	56.38	4.37	0	0	0	1	0	14	MQ
1189	UC52_Pre_refinedBins_bin.91	88.63	4.37	2	0	0	0	0	18	MQ
1190	BK61A_Pre_refinedBins_bin.61	57.89	4.362	0	0	0	0	0	12	MQ
1191	BK29A_Pre_refinedBins_bin.14	65.91	4.36	2	0	0	0	0	19	MQ
1192	JQ4A_Post2_refinedBins_bin.92	55.93	4.36	0	0	0	0	0	9	MQ
1193	KR067E_Pre_refinedBins_bin.51	82.28	4.36	0	0	0	0	0	19	MQ
1194	LL66C_Pre_refinedBins_bin.25	63.89	4.36	3	0	0	0	0	19	MQ
1195	LL9A_Pre_refinedBins_bin.49	77.07	4.36	1	0	0	0	0	21	MQ
1196	SJ010C_Pre_refinedBins_bin.60	61.69	4.36	1	0	0	0	0	13	MQ
1197	SJ023D_Post2_refinedBins_bin.19	68.86	4.36	0	0	0	0	0	15	MQ
1198	SJ048A_Post2_refinedBins_bin.30	82.27	4.36	1	0	0	0	0	20	MQ
1199	SJ054B_Post1_refinedBins_bin.49	63.76	4.36	1	0	0	0	0	21	MQ
1200	SJ054B_Post2_refinedBins_bin.52	51.33	4.36	1	0	0	0	0	14	MQ
1201	JH9B_Pre_refinedBins_bin.6	98.86	4.35	0	2	0	0	0	18	NC
1202	SJ023C_Post2_refinedBins_bin.69	78.97	4.35	2	1	0	0	0	18	MQ
1203	SJ032D_Pre_refinedBins_bin.50	69.7	4.35	1	0	0	0	0	13	MQ
1204	SJ054B_Pre_refinedBins_bin.34	80.57	4.35	1	0	0	0	1	19	MQ
1205	SJ058D_Post2_refinedBins_bin.51	100	4.35	1	0	1	0	0	21	NC
1206	SJ016A_Post2_refinedBins_bin.34	54.97	4.343	0	0	0	2	0	17	MQ
1207	BK16B_Pre_refinedBins_bin.64	92.99	4.34	2	1	0	0	0	20	NC
1208	BK8A_Pre_refinedBins_bin.42	67.7	4.34	0	0	0	1	0	20	MQ
1209	KR032A_Post1_refinedBins_bin.39	60.01	4.34	0	0	0	0	0	8	MQ
1210	KR057B_Post1_refinedBins_bin.71	58.48	4.34	1	0	1	0	0	22	MQ
1211	KR060C_Pre_refinedBins_bin.21	89.38	4.34	1	0	0	0	0	13	MQ
1212	LL2B_Pre_refinedBins_bin.76	79.82	4.34	6	0	1	0	0	25	MQ
1213	SJ016B_Pre_refinedBins_bin.4	74.11	4.34	3	0	0	0	0	16	MQ
1214	SJ018B_Post2_refinedBins_bin.22	76.04	4.34	0	0	1	0	0	17	MQ
1215	SJ048A_Post2_refinedBins_bin.19	99.9	4.34	2	0	0	0	0	25	NC
1216	BK5A_Pre_refinedBins_bin.31	67.19	4.33	2	0	0	0	0	19	MQ
1217	KR004F_Post2_refinedBins_bin.35	58.72	4.33	0	0	0	0	0	14	MQ
1218	LL31F_Pre_refinedBins_bin.87	72.06	4.33	0	0	0	1	0	12	MQ
1219	SJ002A_Pre_refinedBins_bin.21	95.2	4.33	0	0	0	0	0	20	NC
1220	SJ010A_Pre_refinedBins_bin.16	79.64	4.33	0	0	0	0	0	13	MQ
1221	SJ025D_Post2_refinedBins_bin.22	74.89	4.33	2	0	0	1	1	11	MQ
1222	SJ058A_Post1_refinedBins_bin.78	76.72	4.33	1	0	0	1	0	15	MQ
1223	SJ088B_Post2_refinedBins_bin.10	83.71	4.33	1	1	1	0	0	18	MQ
1224	BK29E_Pre_refinedBins_bin.24	97.41	4.32	1	0	0	0	0	15	NC
1225	KR067G_Post2_refinedBins_bin.66	79.03	4.32	0	0	0	0	0	16	MQ
1226	LL61B_Pre_refinedBins_bin.42	73.32	4.32	0	0	0	1	0	18	MQ
1227	SJ001B_Post2_refinedBins_bin.67	85.46	4.32	1	0	0	0	0	13	MQ
1228	SJ010A_Pre_refinedBins_bin.30	85.83	4.32	0	1	0	0	0	9	MQ
1229	SJ017A_Post1_refinedBins_bin.39	58.53	4.32	1	0	0	0	0	15	MQ
1230	SJ054A_Post2_refinedBins_bin.42	97.01	4.32	0	0	0	0	0	19	NC
1231	UC41_Pre_refinedBins_bin.47	86.93	4.32	0	0	0	0	0	19	MQ
1232	JC23C_Post1_refinedBins_bin.129	74.02	4.31	1	0	0	1	0	16	MQ
1233	JQ4E_Pre_refinedBins_bin.100	50.64	4.31	1	1	0	0	0	9	MQ
1234	KR004F_Post1_refinedBins_bin.63	58.02	4.31	0	0	0	0	1	15	MQ
1235	SJ003C_Post1_refinedBins_bin.3	60.77	4.31	0	0	0	0	0	14	MQ
1236	SJ031C_Post2_refinedBins_bin.77	77.26	4.31	0	1	0	2	0	17	MQ
1237	JQ4A_Pre_refinedBins_bin.53	53.38	4.3	3	0	0	0	0	12	MQ
1238	SJ013B_Post1_refinedBins_bin.22	99.93	4.3	1	0	0	2	0	24	NC
1239	SJ016E_Post2_refinedBins_bin.3	78.63	4.3	1	1	1	0	0	22	MQ
1240	SJ021B_Pre_refinedBins_bin.16	77.57	4.3	1	0	0	1	0	12	MQ
1241	SJ040A_Post2_refinedBins_bin.51	98.38	4.3	4	0	0	0	0	24	NC
1242	SJ093C_Pre_refinedBins_bin.60	70.57	4.3	1	0	0	0	0	20	MQ
1243	UC03_Pre_refinedBins_bin.11	77.72	4.3	1	0	0	1	0	18	MQ
1244	UC60_Pre_refinedBins_bin.81	81.65	4.3	0	0	1	1	0	18	MQ
1245	KR067H_Post1_refinedBins_bin.65	67.07	4.29	0	0	0	1	0	15	MQ
1246	LL70B_Pre_refinedBins_bin.84	69.6	4.29	0	0	0	0	0	10	MQ
1247	SJ091A_Post1_refinedBins_bin.95	66.83	4.29	0	0	0	0	0	18	MQ
1248	UC04_Pre_refinedBins_bin.65	62.82	4.29	0	0	0	0	0	14	MQ
1249	BK63A_Post1_refinedBins_bin.44	64.82	4.28	1	0	0	0	1	12	MQ
1250	JQ4A_Post2_refinedBins_bin.9	80.46	4.28	0	0	0	0	0	15	MQ
1251	SJ003C_Post1_refinedBins_bin.43	76.02	4.28	1	1	2	0	0	12	MQ
1252	SJ024B_Post2_refinedBins_bin.31	67.22	4.28	0	0	0	0	0	11	MQ
1253	SJ031D_Post2_refinedBins_bin.22	55.09	4.28	0	0	0	1	0	19	MQ
1254	SJ048A_Post2_refinedBins_bin.48	72.91	4.28	0	0	0	0	0	9	MQ
1255	SJ067A_Post1_refinedBins_bin.12	74.22	4.28	1	0	0	1	0	23	MQ
1256	SJ074A_Post1_refinedBins_bin.45	84.54	4.28	2	0	0	1	0	21	MQ
1257	SJ082A_Pre_refinedBins_bin.56	50.87	4.272	0	0	0	0	0	5	MQ
1258	BK16A_Pre_refinedBins_bin.43	68.09	4.27	2	0	0	0	0	19	MQ
1259	BK54B_Post2_refinedBins_bin.8	91.36	4.27	1	0	1	0	0	20	NC
1260	JQ4E_Pre_refinedBins_bin.38	89.48	4.27	1	0	1	0	1	15	MQ
1261	SJ031C_Post2_refinedBins_bin.2	59.72	4.27	0	0	0	1	1	12	MQ
1262	SJ033A_Pre_refinedBins_bin.72	74.82	4.27	0	0	0	0	0	14	MQ
1263	SJ089A_Pre_refinedBins_bin.50	71.82	4.27	1	0	0	0	0	13	MQ
1264	UC73_Pre_refinedBins_bin.87	93.45	4.27	1	0	0	1	0	20	NC
1265	BK052A_pre_refinedBins_bin.2	80.22	4.26	0	1	1	0	0	12	MQ
1266	BK60A_Pre_refinedBins_bin.42	73.42	4.26	0	0	0	0	0	24	MQ
1267	JL19A_Pre_refinedBins_bin.65	79.17	4.26	0	0	0	0	0	19	MQ
1268	SJ021A_Pre_refinedBins_bin.12	94.74	4.26	1	0	0	0	0	17	NC
1269	SJ091B_Pre_refinedBins_bin.24	81.06	4.26	1	0	0	0	0	13	MQ
1270	UC71_Pre_refinedBins_bin.81	65.94	4.26	1	0	0	1	0	15	MQ
1271	KR032A_Pre_refinedBins_bin.41	80.06	4.25	3	0	0	0	0	17	MQ
1272	KR107D_Pre_refinedBins_bin.26	83.73	4.25	2	0	0	0	0	22	MQ
1273	LL61B_Pre_refinedBins_bin.51	84.09	4.25	1	0	0	0	0	19	MQ
1274	LL64B_Pre_refinedBins_bin.37	86.5	4.25	0	0	0	0	0	22	MQ
1275	SJ032E_Post1_refinedBins_bin.40	84.2	4.25	0	1	1	0	0	19	MQ
1276	SJ058B_Post2_refinedBins_bin.75	80.63	4.25	1	0	0	0	0	15	MQ
1277	UC43_Pre_refinedBins_bin.50	83.26	4.25	2	0	0	0	0	20	MQ
1278	JH9B_Post1_refinedBins_bin.103	99.97	4.24	3	1	1	3	2	21	HQ
1279	KR095B_Pre_refinedBins_bin.72	75.47	4.24	1	0	0	0	0	18	MQ
1280	UC45_Pre_refinedBins_bin.16	82.78	4.24	1	1	0	1	0	14	MQ
1281	LL7B_Pre_refinedBins_bin.7	54.49	4.235	0	0	0	0	0	7	MQ
1282	KR032A_Post1_refinedBins_bin.71	85.24	4.23	2	0	0	0	0	19	MQ
1283	SJ023C_Pre_refinedBins_bin.15	85.43	4.23	3	0	1	0	0	21	MQ
1284	KR004F_Pre_refinedBins_bin.8	86.42	4.22	0	0	0	0	0	22	MQ
1285	KR067F_Pre_refinedBins_bin.10	63.29	4.22	0	0	0	0	0	11	MQ
1286	SJ016B_Pre_refinedBins_bin.38	74.67	4.22	1	1	1	1	1	22	MQ
1287	SJ045C_Pre_refinedBins_bin.10	81.79	4.22	0	1	1	1	0	11	MQ
1288	SJ091C_Post2_refinedBins_bin.3	76.6	4.22	3	1	0	0	0	15	MQ
1289	JQ12A_Pre_refinedBins_bin.13	74.52	4.21	2	0	0	0	0	9	MQ
1290	KR042C_Pre_refinedBins_bin.38	86.2	4.21	0	0	0	0	0	13	MQ
1291	LL16A_Pre_refinedBins_bin.50	81.41	4.21	0	1	0	0	0	12	MQ
1292	SJ027A_Pre_refinedBins_bin.35	100	4.21	0	0	0	1	0	14	NC
1293	SJ032C_Post1_refinedBins_bin.62	86.72	4.21	3	0	1	1	0	19	MQ
1294	UC42_Pre_refinedBins_bin.31	92.88	4.21	0	0	1	0	0	22	NC
1295	BK8C_Pre_refinedBins_bin.76	90.64	4.2	0	0	0	0	0	15	NC
1296	KR047A_Post2_refinedBins_bin.22	94.16	4.2	2	0	0	0	0	17	NC
1297	KR091A_Pre_refinedBins_bin.15	91.98	4.2	2	2	1	0	0	18	NC
1298	LL25D_Pre_refinedBins_bin.7	58.9	4.2	0	0	0	0	0	13	MQ
1299	LL65B_Pre_refinedBins_bin.69	83.2	4.2	1	0	0	0	0	22	MQ
1300	SJ024B_Pre_refinedBins_bin.53	65.96	4.2	0	0	0	0	0	7	MQ
1301	SJ043B_Pre_refinedBins_bin.8	67.94	4.2	0	0	0	1	0	14	MQ
1302	SJ058B_Post2_refinedBins_bin.57	89.67	4.2	0	0	0	0	0	16	MQ
1303	SJ058F_Post2_refinedBins_bin.44	86.09	4.2	1	1	0	0	0	21	MQ
1304	SJ091B_Post1_refinedBins_bin.73	82.38	4.2	2	0	0	0	0	22	MQ
1305	BK16C_Pre_refinedBins_bin.79	94.22	4.19	0	0	0	1	1	17	NC
1306	BK18B_Pre_refinedBins_bin.4	63	4.19	0	0	0	0	0	18	MQ
1307	SJ045D_Post1_refinedBins_bin.39	73.35	4.19	1	1	0	0	0	13	MQ
1308	SJ067B_Post2_refinedBins_bin.14	94.22	4.19	0	0	0	0	0	19	NC
1309	SJ091C_Pre_refinedBins_bin.81	51.71	4.19	1	0	0	0	0	17	MQ
1310	SJ073B_Pre_refinedBins_bin.75	70.25	4.18	2	0	1	1	0	12	MQ
1311	JQ3B_Pre_refinedBins_bin.6	56.31	4.17	0	0	0	0	0	16	MQ
1312	LL11B_Pre_refinedBins_bin.29	86.99	4.17	2	0	0	0	0	22	MQ
1313	LL14A_Pre_refinedBins_bin.33	83.58	4.17	1	0	0	0	0	18	MQ
1314	SJ011B_Post1_refinedBins_bin.10	83.72	4.17	0	0	0	0	0	18	MQ
1315	SJ067A_Pre_refinedBins_bin.6	70.12	4.17	0	0	0	0	0	20	MQ
1316	UC43_Pre_refinedBins_bin.3	91.89	4.17	1	0	1	0	0	17	NC
1317	UC58_Pre_refinedBins_bin.41	84.04	4.17	2	0	0	1	0	16	MQ
1318	JC23C_Post1_refinedBins_bin.85	61.99	4.16	3	0	0	0	0	16	MQ
1319	JL19A_Pre_refinedBins_bin.26	93.65	4.16	0	0	0	0	0	24	NC
1320	KR042B_Pre_refinedBins_bin.95	91.29	4.16	1	0	1	0	0	16	NC
1321	LL55C_Pre_refinedBins_bin.63	80.45	4.16	0	0	0	0	0	15	MQ
1322	BK11A_Post1_refinedBins_bin.52	76.76	4.15	0	0	0	2	0	17	MQ
1323	JJ7A_Post1_refinedBins_bin.26	81.76	4.15	0	0	0	0	0	15	MQ
1324	KR042B_Pre_refinedBins_bin.101	81.06	4.15	1	0	0	0	0	17	MQ
1325	LL1C_Pre_refinedBins_bin.98	73.59	4.15	1	0	0	0	0	14	MQ
1326	LL61D_Pre_refinedBins_bin.33	99.31	4.15	1	0	0	0	0	21	NC
1327	LL62C_Pre_refinedBins_bin.95	91.58	4.15	0	0	0	0	0	12	NC
1328	LL9C_Pre_refinedBins_bin.20	70.8	4.15	0	0	0	0	0	14	MQ
1329	SJ032C_Post2_refinedBins_bin.7	85.67	4.15	2	0	0	0	0	21	MQ
1330	SJ045D_Post2_refinedBins_bin.47	72.79	4.15	0	0	0	0	0	19	MQ
1331	SJ048A_Pre_refinedBins_bin.18	97.07	4.15	2	0	0	0	0	25	NC
1332	SJ058E_Post1_refinedBins_bin.28	52.18	4.15	1	0	0	0	0	6	MQ
1333	BK10A_Pre_refinedBins_bin.74	57.42	4.14	0	0	0	0	0	15	MQ
1334	SJ017B_Pre_refinedBins_bin.48	69.48	4.14	0	0	0	0	0	14	MQ
1335	SJ023D_Post2_refinedBins_bin.26	91.36	4.14	1	0	0	0	0	24	NC
1336	SJ086A_Post2_refinedBins_bin.50	82.8	4.14	0	0	0	1	0	19	MQ
1337	LL54D_Pre_refinedBins_bin.29	64.39	4.13	1	0	0	0	0	11	MQ
1338	LL61D_Pre_refinedBins_bin.91	73.39	4.13	0	1	1	1	0	19	MQ
1339	SJ058F_Pre_refinedBins_bin.14	80.78	4.13	0	0	1	0	0	12	MQ
1340	SJ073B_Pre_refinedBins_bin.51	76.16	4.13	2	0	1	1	0	8	MQ
1341	UC50_Pre_refinedBins_bin.45	52.85	4.13	1	0	0	0	0	18	MQ
1342	JQ3B_Post1_refinedBins_bin.22	90.48	4.12	0	0	0	0	0	13	NC
1343	KR004B_Post1_refinedBins_bin.7	85.93	4.12	1	0	0	1	0	15	MQ
1344	LL25D_Pre_refinedBins_bin.28	50.05	4.12	1	0	0	1	0	15	MQ
1345	SJ003B_Pre_refinedBins_bin.45	95.45	4.12	0	0	0	0	1	20	NC
1346	SJ016C_Post2_refinedBins_bin.24	91.82	4.12	0	0	0	0	0	20	NC
1347	SJ020A_Post2_refinedBins_bin.59	78.84	4.12	0	0	0	0	0	12	MQ
1348	UC70_Pre_refinedBins_bin.56	99.29	4.12	4	0	0	0	0	25	NC
1349	BK6A_Pre_refinedBins_bin.8	81.99	4.11	1	0	0	0	0	13	MQ
1350	JH12B_Post2_refinedBins_bin.50	82.94	4.11	0	1	1	0	0	8	MQ
1351	KR047A_Post2_refinedBins_bin.31	84.18	4.11	2	0	0	0	0	23	MQ
1352	KR067G_Pre_refinedBins_bin.20	98.16	4.11	2	1	1	0	0	24	NC
1353	LL1C_Pre_refinedBins_bin.57	70.18	4.11	1	1	0	0	0	11	MQ
1354	LL62B_Pre_refinedBins_bin.12	75.86	4.11	1	0	1	0	0	22	MQ
1355	LL75A_Pre_refinedBins_bin.90	60.82	4.11	1	0	0	0	0	8	MQ
1356	SJ058A_Post1_refinedBins_bin.62	62.69	4.11	1	0	0	0	0	13	MQ
1357	UC63_Pre_refinedBins_bin.27	60.33	4.11	0	0	0	0	0	12	MQ
1358	KR030D_Pre_refinedBins_bin.42	84.43	4.1	1	0	0	1	0	23	MQ
1359	SJ018B_Pre_refinedBins_bin.28	78.31	4.1	0	0	1	0	0	12	MQ
1360	SJ023C_Post2_refinedBins_bin.8	51.9	4.1	0	0	0	1	0	13	MQ
1361	UC54_Pre_refinedBins_bin.8	84.57	4.1	0	0	0	1	1	17	MQ
1362	BK051A_pre_refinedBins_bin.35	87.4	4.09	0	0	0	0	0	25	MQ
1363	JQ12A_Pre_refinedBins_bin.31	89.87	4.09	1	1	1	1	1	21	MQ
1364	SJ003D_Post2_refinedBins_bin.87	83.86	4.09	0	1	0	1	0	16	MQ
1365	SJ025B_Pre_refinedBins_bin.108	74.41	4.09	0	0	0	0	0	12	MQ
1366	SJ045A_Post1_refinedBins_bin.17	98.09	4.09	4	0	0	0	0	21	NC
1367	JH2A_Pre_refinedBins_bin.6	97.25	4.08	2	0	0	1	0	22	NC
1368	JL19A_Post1_refinedBins_bin.63	99.91	4.08	2	0	0	0	0	13	NC
1369	KR047A_Pre_refinedBins_bin.21	89.74	4.08	0	0	0	1	1	22	MQ
1370	LL71D_Pre_refinedBins_bin.30	74.53	4.08	2	1	0	0	0	20	MQ
1371	SJ018B_Pre_refinedBins_bin.72	80.69	4.08	0	0	0	0	0	16	MQ
1372	SJ032B_Post1_refinedBins_bin.13	77.25	4.08	0	0	0	0	0	12	MQ
1373	BK059C_Pre_refinedBins_bin.36	81.94	4.07	0	1	0	0	0	13	MQ
1374	BK29E_Pre_refinedBins_bin.18	99.97	4.07	1	3	3	2	0	22	HQ
1375	KR059B_Pre_refinedBins_bin.97	60.54	4.07	1	0	0	0	0	8	MQ
1376	LL11A_Pre_refinedBins_bin.52	77.13	4.07	0	0	0	0	0	21	MQ
1377	LL2B_Pre_refinedBins_bin.44	95.9	4.07	2	0	1	0	0	23	NC
1378	SJ016C_post1_refinedBins_bin.86	97.15	4.07	0	0	0	1	1	19	NC
1379	SJ069B_Post1_refinedBins_bin.90	89.23	4.07	2	0	0	0	0	16	MQ
1380	SJ078B_Post1_refinedBins_bin.22	89.13	4.07	1	1	1	0	0	20	MQ
1381	KR067E_Pre_refinedBins_bin.19	71.16	4.06	0	0	0	0	0	16	MQ
1382	LL11B_Pre_refinedBins_bin.3	51.21	4.06	2	0	0	1	1	11	MQ
1383	LL22B_Pre_refinedBins_bin.32	98.93	4.06	0	0	0	0	0	22	NC
1384	UC50_Pre_refinedBins_bin.26	92.6	4.06	1	0	0	0	0	18	NC
1385	JK14A_Pre_refinedBins_bin.47	96.03	4.05	0	0	0	1	0	25	NC
1386	KR048B_Pre_refinedBins_bin.20	73.88	4.05	1	0	0	0	0	13	MQ
1387	LL41B_Pre_refinedBins_bin.66	81.28	4.05	2	1	1	1	0	15	MQ
1388	LL54D_Pre_refinedBins_bin.9	68.56	4.05	0	0	0	0	0	10	MQ
1389	LL64C_Pre_refinedBins_bin.74	55.35	4.05	1	0	0	0	0	11	MQ
1390	LL66A_Pre_refinedBins_bin.1	74.38	4.05	1	1	1	0	1	16	MQ
1391	SJ011B_Pre_refinedBins_bin.51	71.76	4.05	1	0	0	0	0	16	MQ
1392	SJ013B_Post1_refinedBins_bin.8	60.06	4.05	1	0	2	1	0	13	MQ
1393	SJ016E_Post1_refinedBins_bin.27	79.51	4.05	2	0	0	0	0	10	MQ
1394	SJ074A_Pre_refinedBins_bin.26	75.48	4.05	1	1	0	1	0	20	MQ
1395	UC09_Pre_refinedBins_bin.35	92.66	4.05	1	0	0	0	0	23	NC
1396	BK052A_Post1_refinedBins_bin.14	77.06	4.04	0	1	1	0	0	15	MQ
1397	BK057A_Pre_refinedBins_bin.45	76.29	4.04	0	0	0	0	0	13	MQ
1398	JC23C_Post1_refinedBins_bin.36	78.27	4.04	2	0	0	1	0	17	MQ
1399	JK35C_Pre_refinedBins_bin.79	72.71	4.04	1	0	0	0	0	14	MQ
1400	JL25B_Post1_refinedBins_bin.67	81.08	4.04	0	0	0	0	0	12	MQ
1401	KR042A_Pre_refinedBins_bin.57	54.92	4.04	0	0	0	0	0	13	MQ
1402	LL41B_Pre_refinedBins_bin.11	95.45	4.04	1	0	0	1	0	17	NC
1403	LL5A_Pre_refinedBins_bin.5	59.49	4.04	0	0	0	0	0	20	MQ
1404	LL66B_Pre_refinedBins_bin.20	83.41	4.04	0	0	0	2	0	18	MQ
1405	SJ032D_Post2_refinedBins_bin.65	73.1	4.04	0	0	0	0	0	12	MQ
1406	SJ095C_Pre_refinedBins_bin.23	82.89	4.04	1	0	0	0	0	22	MQ
1407	BK60A_Pre_refinedBins_bin.43	92.54	4.03	0	1	0	0	0	18	NC
1408	JH9B_Pre_refinedBins_bin.29	72.64	4.03	0	0	0	1	1	16	MQ
1409	KR004E_Post1_refinedBins_bin.50	97.97	4.03	2	0	0	0	0	22	NC
1410	KR067H_Pre_refinedBins_bin.23	81.24	4.03	0	0	0	0	0	20	MQ
1411	LL31A_Pre_refinedBins_bin.19	96.42	4.03	1	0	0	1	0	20	NC
1412	LL32A_Pre_refinedBins_bin.41	100	4.03	2	0	0	0	0	23	NC
1413	LL57A_Pre_refinedBins_bin.55	75.61	4.03	1	0	1	0	0	15	MQ
1414	LL61B_Pre_refinedBins_bin.85	82.18	4.03	3	0	0	1	0	19	MQ
1415	SJ054A_Post1_refinedBins_bin.14	98.93	4.03	1	0	0	0	0	22	NC
1416	KR067G_Post2_refinedBins_bin.55	58.14	4.026	1	0	0	1	0	4	MQ
1417	SJ062A_Pre_refinedBins_bin.58	51.23	4.02	1	0	0	0	0	12	MQ
1418	SJ082A_Pre_refinedBins_bin.13	50.95	4.02	1	0	0	1	0	16	MQ
1419	SJ087B_Pre_refinedBins_bin.41	76.09	4.02	2	0	0	2	0	11	MQ
1420	UC04_Pre_refinedBins_bin.85	72.3	4.02	0	1	0	0	0	13	MQ
1421	JK1A_Pre_refinedBins_bin.102	75.92	4.01	0	0	0	0	0	8	MQ
1422	JQ12B_Post1_refinedBins_bin.92	77.92	4.01	0	0	0	0	0	16	MQ
1423	JQ4D_Pre_refinedBins_bin.28	99.08	4.01	1	1	0	0	0	18	NC
1424	KR032C_Pre_refinedBins_bin.14	79.02	4.01	1	0	0	0	0	18	MQ
1425	KR091C_Pre_refinedBins_bin.58	80.56	4.01	0	0	0	2	0	13	MQ
1426	LL31E_Pre_refinedBins_bin.32	54.88	4.01	0	0	0	1	0	18	MQ
1427	LL4B_Pre_refinedBins_bin.5	89.06	4.01	1	0	0	0	1	16	MQ
1428	SJ032C_Post1_refinedBins_bin.51	50.69	4.01	0	0	0	0	0	19	MQ
1429	SJ033C_Pre_refinedBins_bin.30	88.38	4.01	2	0	1	0	0	18	MQ
1430	SJ089A_Post2_refinedBins_bin.29	58.57	4.01	1	0	0	1	0	13	MQ
1431	SJ091D_Post1_refinedBins_bin.56	70.96	4.01	0	0	0	0	0	18	MQ
1432	LL55C_Pre_refinedBins_bin.26	67.62	4	1	0	0	0	0	11	MQ
1433	SJ018B_Pre_refinedBins_bin.55	74.09	4	1	0	0	0	1	15	MQ
1434	SJ023D_Post2_refinedBins_bin.37	59.31	4	1	0	0	0	1	16	MQ
1435	SJ032B_Post2_refinedBins_bin.14	99.03	4	0	0	0	0	0	25	NC
1436	SJ062A_Pre_refinedBins_bin.55	84.46	4	5	0	0	0	1	18	MQ
1437	SJ089B_Pre_refinedBins_bin.56	88.21	4	1	0	0	1	0	17	MQ
1438	SJ018A_Pre_refinedBins_bin.28	51.57	3.993	0	0	0	0	0	20	MQ
1439	JC23E_Post1_refinedBins_bin.75	80.89	3.99	0	0	0	0	0	17	MQ
1440	JL25B_Post1_refinedBins_bin.61	81.12	3.99	0	0	0	0	0	18	MQ
1441	KR004B_Post1_refinedBins_bin.62	81.23	3.99	1	1	0	0	0	11	MQ
1442	LL51E_Pre_refinedBins_bin.76	86.29	3.99	1	0	0	0	0	18	MQ
1443	LL70B_Pre_refinedBins_bin.21	80.45	3.99	1	0	0	0	0	20	MQ
1444	LL71E_Pre_refinedBins_bin.25	83.5	3.99	2	0	1	2	0	21	MQ
1445	SJ031A_Post2_refinedBins_bin.24	51.19	3.99	1	0	0	0	0	12	MQ
1446	SJ033A_Pre_refinedBins_bin.45	54.88	3.99	0	0	0	0	0	9	MQ
1447	SJ088A_Post1_refinedBins_bin.28	85.3	3.99	0	0	1	0	0	22	MQ
1448	BK5A_Post1_refinedBins_bin.68	82.49	3.98	0	1	0	1	0	22	MQ
1449	JT4B_Pre_refinedBins_bin.25	81.56	3.98	2	0	0	1	0	17	MQ
1450	LL66C_Pre_refinedBins_bin.123	76.17	3.98	0	0	0	0	1	15	MQ
1451	SJ032C_Post2_refinedBins_bin.30	85.22	3.98	0	0	0	1	0	19	MQ
1452	SJ047A_Pre_refinedBins_bin.45	70.49	3.98	0	1	1	0	0	16	MQ
1453	BK60A_Post1_refinedBins_bin.96	74.54	3.97	1	0	1	0	0	14	MQ
1454	BK62A_Post1_refinedBins_bin.44	95.57	3.97	2	1	1	0	0	15	NC
1455	JL19B_Post2_refinedBins_bin.34	94.33	3.97	1	0	1	0	0	18	NC
1456	KR004F_Post2_refinedBins_bin.2	81.81	3.97	0	0	0	0	1	21	MQ
1457	KR099A_Post2_refinedBins_bin.13	100	3.97	2	1	0	2	1	24	HQ
1458	LL33B_Pre_refinedBins_bin.56	70.3	3.97	0	0	0	0	0	17	MQ
1459	LL51C_Pre_refinedBins_bin.121	90.28	3.97	1	1	1	0	0	17	NC
1460	SJ024A_Post2_refinedBins_bin.51	74.57	3.97	0	0	1	1	0	18	MQ
1461	SJ031C_Pre_refinedBins_bin.50	60.45	3.97	0	0	0	0	0	7	MQ
1462	SJ033A_Post2_refinedBins_bin.18	93.78	3.97	5	0	0	0	0	24	NC
1463	SJ058F_Pre_refinedBins_bin.72	83.19	3.97	0	0	0	2	0	16	MQ
1464	SJ067A_Pre_refinedBins_bin.20	91.52	3.97	0	0	0	0	0	14	NC
1465	SJ088A_Pre_refinedBins_bin.8	70.45	3.97	1	0	0	0	0	16	MQ
1466	SJ091B_Post2_refinedBins_bin.69	51.53	3.97	0	0	0	0	0	17	MQ
1467	BK16A_Pre_refinedBins_bin.37	87.41	3.96	1	0	0	0	0	21	MQ
1468	JH12B_Post2_refinedBins_bin.63	62.91	3.96	2	0	1	0	0	17	MQ
1469	JH12B_Pre_refinedBins_bin.41	99.63	3.96	2	0	0	0	0	24	NC
1470	KR004E_Post2_refinedBins_bin.6	52.5	3.96	1	0	0	0	0	6	MQ
1471	KR004E_Post2_refinedBins_bin.8	67.97	3.96	0	1	1	0	0	9	MQ
1472	KR048C_Post1_refinedBins_bin.35	75.09	3.96	1	1	0	0	0	11	MQ
1473	LL9C_Pre_refinedBins_bin.86	92.64	3.96	1	1	1	1	1	25	HQ
1474	SJ013A_Post2_refinedBins_bin.22	55.93	3.96	1	0	1	0	0	20	MQ
1475	SJ024B_Post2_refinedBins_bin.47	73.55	3.96	0	0	0	0	0	14	MQ
1476	SJ036A_Post2_refinedBins_bin.71	73.79	3.96	0	1	1	0	0	18	MQ
1477	SJ053A_Pre_refinedBins_bin.38	85.29	3.96	0	0	1	0	0	23	MQ
1478	SJ058A_Pre_refinedBins_bin.56	99.65	3.96	2	1	1	1	1	16	NC
1479	SJ058E_Post2_refinedBins_bin.17	95.51	3.96	1	0	0	0	0	14	NC
1480	SJ088B_Pre_refinedBins_bin.18	81.47	3.96	0	2	1	0	0	14	MQ
1481	SJ089A_Pre_refinedBins_bin.32	81.87	3.96	0	0	0	1	0	12	MQ
1482	KR004E_Post2_refinedBins_bin.32	74.56	3.95	0	0	0	0	0	18	MQ
1483	KR067H_Post2_refinedBins_bin.64	52.92	3.95	0	0	1	0	0	3	MQ
1484	KR099A_Pre_refinedBins_bin.71	77.21	3.95	3	0	0	0	1	16	MQ
1485	LL54D_Pre_refinedBins_bin.41	84.89	3.95	0	0	0	2	1	22	MQ
1486	SJ016D_Pre_refinedBins_bin.73	99.04	3.95	1	0	0	0	0	18	NC
1487	SJ021B_Pre_refinedBins_bin.86	79.93	3.95	2	0	0	0	0	19	MQ
1488	SJ023C_Post2_refinedBins_bin.65	87.41	3.95	2	0	0	0	0	18	MQ
1489	SJ058A_Pre_refinedBins_bin.57	70.99	3.95	1	0	0	0	0	12	MQ
1490	SJ089B_Post2_refinedBins_bin.88	82.27	3.95	3	0	0	1	0	21	MQ
1491	JC23E_Post1_refinedBins_bin.72	98.96	3.94	0	0	0	1	1	24	NC
1492	LL32D_Pre_refinedBins_bin.60	69.69	3.94	1	0	1	0	0	17	MQ
1493	LL63A_Pre_refinedBins_bin.54	82.68	3.94	1	0	1	0	0	12	MQ
1494	LL64B_Pre_refinedBins_bin.50	94.57	3.94	1	0	1	0	0	24	NC
1495	SJ010C_Pre_refinedBins_bin.8	98.49	3.94	1	0	0	0	0	18	NC
1496	UC52_Pre_refinedBins_bin.45	82.61	3.94	1	0	0	1	0	18	MQ
1497	UC68_Pre_refinedBins_bin.43	90.49	3.94	1	0	0	0	0	11	NC
1498	BK21A_Post1_refinedBins_bin.46	79.47	3.93	0	0	0	0	1	17	MQ
1499	JL3B_Pre_refinedBins_bin.11	99.9	3.93	1	0	0	0	0	25	NC
1500	KR032C_Pre_refinedBins_bin.58	63.28	3.93	3	0	0	0	0	14	MQ
1501	LL51C_Pre_refinedBins_bin.8	97.41	3.93	0	0	0	0	1	24	NC
1502	SJ003B_Post1_refinedBins_bin.25	79.49	3.93	0	0	0	1	0	15	MQ
1503	SJ032D_Pre_refinedBins_bin.61	78.72	3.93	1	0	0	2	0	19	MQ
1504	UC45_Pre_refinedBins_bin.24	88.59	3.93	2	0	1	0	0	22	MQ
1505	UC49_Pre_refinedBins_bin.55	73.25	3.93	0	0	1	1	0	12	MQ
1506	UC59_Pre_refinedBins_bin.63	56.79	3.93	0	0	0	1	0	6	MQ
1507	JL25B_Pre_refinedBins_bin.23	95.81	3.92	1	0	0	0	1	21	NC
1508	LL4C_Pre_refinedBins_bin.15	63.13	3.92	0	0	0	0	0	11	MQ
1509	LL66C_Pre_refinedBins_bin.31	83	3.92	4	1	1	2	1	22	MQ
1510	BK16D_Pre_refinedBins_bin.12	98.88	3.91	2	0	0	0	0	24	NC
1511	KR048B_Pre_refinedBins_bin.94	68.02	3.91	0	0	0	1	1	15	MQ
1512	SJ004D_Pre_refinedBins_bin.61	57.66	3.91	0	0	0	0	0	14	MQ
1513	SJ016E_Post2_refinedBins_bin.91	74.07	3.91	2	0	0	0	0	13	MQ
1514	SJ016E_Pre_refinedBins_bin.46	92.25	3.91	1	2	2	1	1	25	HQ
1515	SJ025C_Pre_refinedBins_bin.72	74.07	3.91	2	0	0	0	1	13	MQ
1516	SJ032D_Pre_refinedBins_bin.9	82.98	3.91	1	0	0	0	0	20	MQ
1517	SJ045D_Post2_refinedBins_bin.53	75.48	3.91	3	0	0	0	0	20	MQ
1518	SJ058E_Post1_refinedBins_bin.77	72.91	3.91	0	0	0	1	0	18	MQ
1519	SJ089B_Post2_refinedBins_bin.70	78	3.91	3	0	0	0	0	17	MQ
1520	UC41_Pre_refinedBins_bin.84	81.83	3.91	0	1	0	1	0	19	MQ
1521	UC61_Pre_refinedBins_bin.37	91.59	3.91	2	0	0	1	1	16	NC
1522	JL25B_Post2_refinedBins_bin.9	73.69	3.9	0	0	0	0	0	24	MQ
1523	JL25B_Pre_refinedBins_bin.63	99.15	3.9	1	1	0	0	0	25	NC
1524	JQ2A_Pre_refinedBins_bin.67	83.36	3.9	0	0	0	0	0	19	MQ
1525	KR047A_Post2_refinedBins_bin.68	56.91	3.9	1	0	0	0	0	17	MQ
1526	KR063A_Pre_refinedBins_bin.45	92.12	3.9	2	0	0	1	1	18	NC
1527	LL56A_Pre_refinedBins_bin.32	94.04	3.9	1	0	0	1	0	20	NC
1528	SJ016C_Post2_refinedBins_bin.5	84	3.9	1	0	1	0	0	23	MQ
1529	UC28_Pre_refinedBins_bin.98	80.62	3.9	0	0	0	0	0	11	MQ
1530	BK60A_Post1_refinedBins_bin.27	55.88	3.89	1	0	1	0	0	12	MQ
1531	KR030D_Pre_refinedBins_bin.76	62.82	3.89	1	0	1	0	0	11	MQ
1532	KR048B_Post2_refinedBins_bin.26	59.86	3.89	1	0	0	0	0	13	MQ
1533	KR067H_Post2_refinedBins_bin.45	94.8	3.89	0	0	0	2	1	21	NC
1534	LL64C_Pre_refinedBins_bin.35	90.62	3.89	0	0	0	0	0	24	NC
1535	SJ088A_Post1_refinedBins_bin.77	64.31	3.89	0	0	0	1	1	7	MQ
1536	BK62A_Post1_refinedBins_bin.61	58.84	3.88	0	1	0	0	1	12	MQ
1537	BK62D_Post2_refinedBins_bin.27	51.94	3.88	1	0	0	0	0	10	MQ
1538	JQ19C_Pre_refinedBins_bin.63	81.56	3.88	1	0	0	0	0	10	MQ
1539	JQ4A_Post2_refinedBins_bin.17	75.34	3.88	1	0	0	0	0	17	MQ
1540	KR004F_Post2_refinedBins_bin.58	86.72	3.88	2	0	0	0	0	13	MQ
1541	KR048C_Post1_refinedBins_bin.19	70.6	3.88	0	0	0	0	0	19	MQ
1542	KR091C_Pre_refinedBins_bin.89	94.87	3.88	1	2	1	0	0	21	NC
1543	LL32A_Pre_refinedBins_bin.58	100	3.88	2	1	1	0	0	21	NC
1544	SJ030B_Pre_refinedBins_bin.43	99.8	3.88	1	0	0	0	0	14	NC
1545	SJ045E_Post1_refinedBins_bin.8	80.67	3.88	0	0	0	0	0	21	MQ
1546	SJ058F_Post2_refinedBins_bin.6	78.94	3.88	3	0	0	0	0	21	MQ
1547	SJ067F_Post2_refinedBins_bin.71	97.6	3.88	0	0	0	0	0	18	NC
1548	SJ093C_Pre_refinedBins_bin.87	82.69	3.88	2	1	1	0	0	21	MQ
1549	UC31_Pre_refinedBins_bin.41	83.75	3.88	0	0	0	1	0	23	MQ
1550	BK29C_Pre_refinedBins_bin.47	86.86	3.87	0	1	0	0	0	13	MQ
1551	KR067A_Pre_refinedBins_bin.81	97.32	3.87	1	0	0	1	1	13	NC
1552	LL33B_Pre_refinedBins_bin.34	80.8	3.87	0	1	0	0	0	19	MQ
1553	LL72A_Pre_refinedBins_bin.71	93.03	3.87	0	2	1	0	0	17	NC
1554	SJ016A_Post1_refinedBins_bin.69	82.68	3.87	0	0	0	0	0	19	MQ
1555	SJ067F_Pre_refinedBins_bin.14	79.98	3.87	2	0	0	0	0	14	MQ
1556	BK054C_Pre_refinedBins_bin.20	80.55	3.86	0	0	0	0	0	23	MQ
1557	JH2A_Pre_refinedBins_bin.40	69.73	3.86	0	0	0	0	0	16	MQ
1558	KR004E_Pre_refinedBins_bin.32	80.76	3.86	0	0	0	1	0	18	MQ
1559	KR032A_Pre_refinedBins_bin.95	79.77	3.86	0	0	0	2	0	23	MQ
1560	KR048C_Post1_refinedBins_bin.85	55.22	3.86	0	0	0	0	0	11	MQ
1561	KR059C_Pre_refinedBins_bin.32	89.19	3.86	1	0	0	0	0	19	MQ
1562	LL48A_Pre_refinedBins_bin.96	80.58	3.86	0	0	0	0	0	21	MQ
1563	LL51C_Pre_refinedBins_bin.15	81.25	3.86	0	0	0	0	0	15	MQ
1564	LL9C_Pre_refinedBins_bin.60	50.66	3.86	0	0	0	0	0	12	MQ
1565	SJ040A_Post2_refinedBins_bin.34	53.12	3.86	0	0	0	0	0	15	MQ
1566	SJ091D_Pre_refinedBins_bin.63	95.06	3.86	3	0	0	0	0	24	NC
1567	UC32_Pre_refinedBins_bin.30	74.56	3.86	0	0	0	1	0	13	MQ
1568	UC58_Pre_refinedBins_bin.46	81.77	3.86	0	0	0	1	0	18	MQ
1569	UC62_Pre_refinedBins_bin.52	92.52	3.86	1	0	0	0	0	19	NC
1570	BK54B_Post2_refinedBins_bin.32	72.29	3.85	0	0	2	0	1	20	MQ
1571	LL24B_Pre_refinedBins_bin.1	86.46	3.85	3	0	0	0	0	23	MQ
1572	LL61D_Pre_refinedBins_bin.60	98.31	3.85	3	0	0	0	0	21	NC
1573	LL65B_Pre_refinedBins_bin.66	66.51	3.85	3	0	0	0	0	12	MQ
1574	SJ032A_Pre_refinedBins_bin.59	93.19	3.85	2	0	0	1	1	16	NC
1575	SJ032B_Post1_refinedBins_bin.50	91.82	3.85	1	0	0	1	0	17	NC
1576	SJ095B_Post2_refinedBins_bin.79	73.69	3.85	1	0	0	0	0	10	MQ
1577	SJ096C_Pre_refinedBins_bin.11	66.82	3.85	0	0	0	0	0	10	MQ
1578	UC31_Pre_refinedBins_bin.48	68.47	3.85	0	0	1	0	0	20	MQ
1579	BK5A_Post1_refinedBins_bin.21	97.71	3.84	1	0	0	0	0	20	NC
1580	JQ4A_Post2_refinedBins_bin.39	74.04	3.84	0	0	0	2	0	18	MQ
1581	KR032C_Pre_refinedBins_bin.22	72.34	3.84	0	0	0	0	0	13	MQ
1582	LL31B_Pre_refinedBins_bin.76	77.65	3.84	3	0	0	0	0	21	MQ
1583	LL53A_Pre_refinedBins_bin.51	67.85	3.84	0	0	0	0	0	15	MQ
1584	SJ001B_Post2_refinedBins_bin.21	59.76	3.84	1	0	0	0	0	12	MQ
1585	SJ002A_Post1_refinedBins_bin.52	98.08	3.84	1	0	1	0	0	18	NC
1586	UC60_Pre_refinedBins_bin.86	54.08	3.84	1	0	0	0	0	8	MQ
1587	BK8B_Pre_refinedBins_bin.53	53.34	3.83	2	0	0	1	0	7	MQ
1588	JH12B_Post1_refinedBins_bin.82	94.73	3.83	0	1	1	2	0	20	NC
1589	JK35B_Pre_refinedBins_bin.95	58.4	3.83	1	0	0	0	1	16	MQ
1590	KR067H_Post2_refinedBins_bin.4	52.37	3.83	0	0	1	0	0	13	MQ
1591	KR070B_Pre_refinedBins_bin.89	70.67	3.83	0	0	0	0	0	20	MQ
1592	LL33B_Pre_refinedBins_bin.43	87.21	3.83	2	0	0	0	1	21	MQ
1593	LL53B_Pre_refinedBins_bin.51	73.68	3.83	0	0	0	1	0	12	MQ
1594	LL64A_Pre_refinedBins_bin.40	51.56	3.83	1	0	0	0	0	13	MQ
1595	SJ016B_Post1_refinedBins_bin.46	80.86	3.83	0	0	0	0	1	13	MQ
1596	SJ067E_Pre_refinedBins_bin.55	69.8	3.83	0	0	0	0	0	19	MQ
1597	BK16B_Pre_refinedBins_bin.83	88.25	3.82	1	0	0	0	0	20	MQ
1598	JH12B_Pre_refinedBins_bin.19	99.94	3.82	1	0	0	1	0	24	NC
1599	SJ013A_Pre_refinedBins_bin.43	70.93	3.82	1	0	0	0	0	16	MQ
1600	SJ016C_post1_refinedBins_bin.65	80.23	3.82	1	0	0	0	0	18	MQ
1601	SJ069C_Pre_refinedBins_bin.47	86.58	3.82	0	0	0	0	0	18	MQ
1602	JL23A_Pre_refinedBins_bin.47	65.96	3.81	1	1	1	1	1	23	MQ
1603	KR004F_Pre_refinedBins_bin.33	79.18	3.81	0	0	0	2	1	15	MQ
1604	KR032A_Pre_refinedBins_bin.98	63.47	3.81	0	0	0	1	1	10	MQ
1605	KR060C_Pre_refinedBins_bin.74	68.89	3.81	0	0	0	0	0	18	MQ
1606	SJ017B_Pre_refinedBins_bin.19	94.86	3.81	1	0	0	1	1	20	NC
1607	SJ032A_Post2_refinedBins_bin.73	93.91	3.81	3	1	0	0	0	23	NC
1608	SJ067F_Pre_refinedBins_bin.56	91.88	3.81	3	0	1	0	0	16	NC
1609	UC02_Pre_refinedBins_bin.63	86.92	3.81	1	0	1	0	0	17	MQ
1610	SJ023C_Pre_refinedBins_bin.12	92.2	3.805	1	0	0	0	0	21	NC
1611	JC23C_Post1_refinedBins_bin.31	71.21	3.8	0	0	0	0	0	13	MQ
1612	JL19A_Post1_refinedBins_bin.1	92.65	3.8	5	0	0	0	0	23	NC
1613	KR059B_Pre_refinedBins_bin.17	99.88	3.8	0	2	0	0	0	21	NC
1614	KR067A_Pre_refinedBins_bin.60	90.89	3.8	1	0	0	0	0	20	NC
1615	KR069B_Pre_refinedBins_bin.14	87.1	3.8	0	0	0	0	0	19	MQ
1616	KR069B_Pre_refinedBins_bin.93	73.78	3.8	2	0	0	0	0	11	MQ
1617	SJ013A_Post2_refinedBins_bin.55	76.74	3.8	3	0	0	0	0	18	MQ
1618	SJ023C_Post2_refinedBins_bin.48	99.81	3.8	0	0	1	0	0	26	NC
1619	UC44_Pre_refinedBins_bin.46	85.87	3.8	0	0	0	1	0	20	MQ
1620	SJ004D_Pre_refinedBins_bin.69	55.4	3.797	1	0	0	0	0	12	MQ
1621	KR033B_Pre_refinedBins_bin.22	81.2	3.793	1	0	0	0	0	19	MQ
1622	JQ4A_Post2_refinedBins_bin.91	92.21	3.79	3	0	0	0	0	13	NC
1623	KR042B_Pre_refinedBins_bin.102	79.53	3.79	2	0	0	1	0	14	MQ
1624	KR047A_Post1_refinedBins_bin.63	79.3	3.79	1	0	0	0	0	21	MQ
1625	LL5B_Pre_refinedBins_bin.38	71.34	3.79	0	0	0	0	0	17	MQ
1626	LL9A_Pre_refinedBins_bin.45	90.15	3.79	2	0	0	0	0	17	NC
1627	SJ001B_Post1_refinedBins_bin.7	98.56	3.79	2	1	1	1	1	24	HQ
1628	SJ012A_Pre_refinedBins_bin.60	95.61	3.79	0	0	0	0	0	19	NC
1629	SJ016D_Post1_refinedBins_bin.28	88.13	3.79	1	0	0	0	0	21	MQ
1630	SJ024A_Pre_refinedBins_bin.14	83.78	3.79	1	0	0	0	0	19	MQ
1631	SJ058B_Pre_refinedBins_bin.60	94.04	3.79	0	0	0	0	0	13	NC
1632	SJ086A_Post1_refinedBins_bin.27	71.87	3.79	1	0	0	1	1	10	MQ
1633	SJ096B_Pre_refinedBins_bin.3	78.93	3.79	0	0	0	1	0	18	MQ
1634	BK16A_Pre_refinedBins_bin.36	87.5	3.78	0	0	1	0	0	23	MQ
1635	BK8A_Pre_refinedBins_bin.21	80.92	3.78	0	0	0	1	0	19	MQ
1636	KR091C_Pre_refinedBins_bin.38	99.05	3.78	1	0	0	0	0	25	NC
1637	LL61D_Pre_refinedBins_bin.56	86.85	3.78	1	0	0	1	1	20	MQ
1638	SJ078B_Post1_refinedBins_bin.11	57.72	3.78	0	2	1	0	0	11	MQ
1639	BK054C_Post1_refinedBins_bin.56	77.81	3.77	0	0	0	0	0	21	MQ
1640	BK62B_Post1_refinedBins_bin.41	70.62	3.77	0	0	0	0	0	14	MQ
1641	LL4D_Pre_refinedBins_bin.41	86.11	3.77	1	0	0	1	1	17	MQ
1642	LL61B_Pre_refinedBins_bin.31	99.54	3.77	2	0	0	2	0	18	NC
1643	LL6C_Pre_refinedBins_bin.33	91.09	3.77	0	0	1	0	0	16	NC
1644	LL75A_Pre_refinedBins_bin.51	79.81	3.77	0	1	0	1	0	18	MQ
1645	SJ012A_Post2_refinedBins_bin.66	52.53	3.77	1	0	0	0	0	12	MQ
1646	SJ017A_Post2_refinedBins_bin.13	73.42	3.77	1	1	0	0	0	14	MQ
1647	SJ045A_Post1_refinedBins_bin.23	76.09	3.77	0	0	0	0	0	20	MQ
1648	SJ054A_Post2_refinedBins_bin.11	79.91	3.77	1	0	0	0	0	15	MQ
1649	SJ092B_Post1_refinedBins_bin.40	52.98	3.77	1	1	0	1	0	10	MQ
1650	UC36_Pre_refinedBins_bin.2	95.96	3.77	2	0	0	0	1	23	NC
1651	BK102A_Pre_refinedBins_bin.66	86.49	3.76	0	0	2	0	0	20	MQ
1652	BK11B_Pre_refinedBins_bin.72	58.93	3.76	1	0	0	1	0	12	MQ
1653	JL25B_Post1_refinedBins_bin.14	96.4	3.76	0	0	1	0	0	23	NC
1654	KR082B_Pre_refinedBins_bin.14	91.6	3.76	1	0	0	2	0	17	NC
1655	LL64C_Pre_refinedBins_bin.62	86.84	3.76	0	0	1	1	0	19	MQ
1656	SJ031D_Post1_refinedBins_bin.40	94.55	3.76	2	0	1	0	0	18	NC
1657	SJ040A_Pre_refinedBins_bin.70	79.47	3.76	0	1	0	0	0	18	MQ
1658	SJ067A_Post2_refinedBins_bin.19	97.55	3.76	2	0	0	1	0	23	NC
1659	SJ086A_Pre_refinedBins_bin.76	79.33	3.76	0	0	0	3	0	12	MQ
1660	JC23E_Post1_refinedBins_bin.29	54.9	3.75	0	0	0	0	0	13	MQ
1661	JQ4A_Post2_refinedBins_bin.82	71.24	3.75	2	1	0	1	0	16	MQ
1662	KR033C_Pre_refinedBins_bin.19	79.87	3.75	1	0	0	0	0	14	MQ
1663	KR048C_Post1_refinedBins_bin.33	68.94	3.75	0	0	0	0	0	13	MQ
1664	KR069A_Pre_refinedBins_bin.65	85.91	3.75	1	0	0	0	0	18	MQ
1665	LL11A_Pre_refinedBins_bin.20	92.21	3.75	0	0	0	1	0	19	NC
1666	LL31B_Pre_refinedBins_bin.52	69.01	3.75	0	0	0	0	0	17	MQ
1667	LL31G_Pre_refinedBins_bin.74	55.36	3.75	0	1	1	0	0	15	MQ
1668	LL5B_Pre_refinedBins_bin.1	67.66	3.75	2	0	0	0	2	8	MQ
1669	LL9E_Pre_refinedBins_bin.91	70.2	3.75	0	1	0	0	0	9	MQ
1670	SJ030B_Post2_refinedBins_bin.19	81.48	3.75	1	0	0	0	0	23	MQ
1671	SJ088B_Pre_refinedBins_bin.13	55.91	3.75	0	0	0	1	0	17	MQ
1672	UC04_Pre_refinedBins_bin.73	92.91	3.75	1	0	0	0	0	17	NC
1673	UC73_Pre_refinedBins_bin.82	67.62	3.75	1	0	1	0	0	16	MQ
1674	BK16B_Pre_refinedBins_bin.7	82.83	3.74	1	0	0	0	0	18	MQ
1675	BK54B_Post2_refinedBins_bin.39	74.63	3.74	1	0	1	2	0	20	MQ
1676	BK60A_Pre_refinedBins_bin.87	82.3	3.74	2	0	0	0	0	18	MQ
1677	KR063C_Pre_refinedBins_bin.56	94.61	3.74	1	0	0	1	1	19	NC
1678	LL71E_Pre_refinedBins_bin.37	99.79	3.74	2	0	0	0	0	22	NC
1679	SJ003A_Pre_refinedBins_bin.103	62.53	3.74	1	0	0	0	0	8	MQ
1680	SJ017B_Pre_refinedBins_bin.18	90.97	3.74	2	0	0	0	0	16	NC
1681	SJ023D_Post1_refinedBins_bin.58	87.64	3.74	0	0	0	1	0	20	MQ
1682	SJ043B_Post1_refinedBins_bin.18	76.46	3.74	2	0	0	1	0	20	MQ
1683	SJ088A_Post1_refinedBins_bin.38	81.46	3.74	0	0	0	1	0	20	MQ
1684	UC12_Pre_refinedBins_bin.47	80.68	3.74	0	0	0	0	0	17	MQ
1685	UC63_Pre_refinedBins_bin.44	71.29	3.74	2	0	0	0	0	9	MQ
1686	JC23E_Pre_refinedBins_bin.37	63.68	3.73	2	0	0	0	0	11	MQ
1687	JJ7A_Pre_refinedBins_bin.12	65.28	3.73	0	0	0	0	0	17	MQ
1688	KR042A_Pre_refinedBins_bin.52	77.97	3.73	2	0	0	1	0	17	MQ
1689	LL21A_Pre_refinedBins_bin.27	83.22	3.73	1	0	0	0	1	17	MQ
1690	SJ031A_Pre_refinedBins_bin.39	92.8	3.73	1	0	0	0	0	19	NC
1691	SJ088A_Post2_refinedBins_bin.19	84.14	3.73	1	0	0	0	0	20	MQ
1692	SJ091C_Pre_refinedBins_bin.71	90.4	3.73	1	0	0	0	0	19	NC
1693	BK60A_Pre_refinedBins_bin.36	100	3.72	1	0	0	0	0	20	NC
1694	KR004F_Pre_refinedBins_bin.54	73.53	3.72	0	1	0	0	0	7	MQ
1695	KR059B_Pre_refinedBins_bin.28	79.07	3.72	3	0	1	0	0	22	MQ
1696	KR067G_Pre_refinedBins_bin.15	96.41	3.72	0	0	0	0	0	20	NC
1697	LL26A_Pre_refinedBins_bin.41	75.75	3.72	0	0	0	0	0	10	MQ
1698	LL31B_Pre_refinedBins_bin.57	78.92	3.72	0	0	0	0	0	21	MQ
1699	SJ003A_Pre_refinedBins_bin.47	92.72	3.72	1	0	0	2	0	19	NC
1700	SJ020A_Pre_refinedBins_bin.30	67.33	3.72	0	0	0	0	0	14	MQ
1701	SJ025E_Pre_refinedBins_bin.5	89.54	3.72	0	0	0	1	0	23	MQ
1702	SJ067C_Pre_refinedBins_bin.11	66.85	3.72	1	0	0	0	0	15	MQ
1703	SJ069B_Post2_refinedBins_bin.81	51.73	3.72	2	1	0	1	0	5	MQ
1704	SJ072B_Post1_refinedBins_bin.67	87.56	3.72	0	0	1	0	0	24	MQ
1705	UC43_Pre_refinedBins_bin.24	86.2	3.72	1	1	0	0	0	18	MQ
1706	BK54B_Post2_refinedBins_bin.36	66.76	3.71	0	0	0	0	0	17	MQ
1707	LL24B_Pre_refinedBins_bin.26	70.32	3.71	0	0	0	0	0	17	MQ
1708	LL4B_Pre_refinedBins_bin.18	64.79	3.71	0	0	0	0	0	12	MQ
1709	SJ048A_Post1_refinedBins_bin.37	79.11	3.71	0	0	0	0	0	12	MQ
1710	SJ068A_Post1_refinedBins_bin.53	99.99	3.71	1	0	0	4	0	19	NC
1711	UC43_Pre_refinedBins_bin.73	76.01	3.71	0	0	0	0	0	21	MQ
1712	BK62A_Post2_refinedBins_bin.1	54.25	3.7	0	0	0	2	1	10	MQ
1713	JQ19B_Pre_refinedBins_bin.13	93.3	3.7	1	0	2	1	1	23	NC
1714	LL31D_Pre_refinedBins_bin.1	69	3.7	0	0	0	0	1	9	MQ
1715	SJ003A_Pre_refinedBins_bin.91	61.74	3.7	3	0	0	1	0	22	MQ
1716	SJ012A_Post1_refinedBins_bin.97	81.18	3.7	0	0	0	0	0	17	MQ
1717	SJ016E_Post1_refinedBins_bin.43	62.8	3.7	0	0	1	0	0	17	MQ
1718	SJ058B_Post2_refinedBins_bin.8	65.43	3.7	2	0	0	0	0	11	MQ
1719	SJ067G_Post1_refinedBins_bin.18	73.95	3.7	3	0	0	0	0	12	MQ
1720	SJ087B_Pre_refinedBins_bin.21	96.24	3.7	0	0	0	0	1	21	NC
1721	SJ088A_Post2_refinedBins_bin.105	93.95	3.7	0	0	0	0	0	20	NC
1722	UC09_Pre_refinedBins_bin.57	87.39	3.7	1	1	1	0	0	13	MQ
1723	UC59_Pre_refinedBins_bin.33	99.6	3.7	0	0	0	0	0	16	NC
1724	BK54B_Pre_refinedBins_bin.48	85.32	3.69	0	0	0	0	0	21	MQ
1725	BK61A_Pre_refinedBins_bin.45	73.68	3.69	1	0	0	0	0	10	MQ
1726	BK62A_Pre_refinedBins_bin.2	60.47	3.69	2	0	0	0	0	8	MQ
1727	JC23C_Pre_refinedBins_bin.3	97.99	3.69	1	0	0	1	0	19	NC
1728	JH2B_Pre_refinedBins_bin.23	91.8	3.69	0	0	0	0	0	19	NC
1729	LL25A_Pre_refinedBins_bin.13	73.21	3.69	0	0	0	1	1	14	MQ
1730	LL32C_Pre_refinedBins_bin.20	58.35	3.69	0	2	2	0	0	6	MQ
1731	LL54B_Pre_refinedBins_bin.73	67.37	3.69	2	0	0	0	0	22	MQ
1732	LL62B_Pre_refinedBins_bin.28	73.26	3.69	0	0	0	0	0	14	MQ
1733	SJ003D_Post2_refinedBins_bin.20	88	3.69	2	0	0	0	0	15	MQ
1734	SJ043B_Pre_refinedBins_bin.10	99.13	3.69	1	0	0	0	0	21	NC
1735	SJ058F_Post1_refinedBins_bin.42	68.49	3.69	1	0	0	0	0	8	MQ
1736	SJ067G_Pre_refinedBins_bin.32	64.35	3.69	0	0	0	0	0	8	MQ
1737	UC45_Pre_refinedBins_bin.1	81.89	3.69	0	0	0	0	1	8	MQ
1738	JH2B_Pre_refinedBins_bin.68	66.96	3.68	1	0	0	0	0	11	MQ
1739	JL23A_Post1_refinedBins_bin.108	77.65	3.68	0	0	0	0	1	10	MQ
1740	JL6C_Pre_refinedBins_bin.5	58.89	3.68	1	0	0	2	0	7	MQ
1741	LL56C_Pre_refinedBins_bin.18	93.22	3.68	1	0	0	0	0	10	NC
1742	LL5D_Pre_refinedBins_bin.38	61.32	3.68	1	1	1	1	1	15	MQ
1743	LL66B_Pre_refinedBins_bin.25	67.36	3.68	1	1	0	0	0	13	MQ
1744	LL71E_Pre_refinedBins_bin.23	77.8	3.68	0	0	0	0	0	19	MQ
1745	SJ016D_Post1_refinedBins_bin.3	81.18	3.68	0	0	0	0	0	18	MQ
1746	SJ018A_Post1_refinedBins_bin.7	86.64	3.68	0	0	0	0	0	20	MQ
1747	SJ020A_Pre_refinedBins_bin.37	88.3	3.68	1	0	0	0	0	20	MQ
1748	SJ040A_Pre_refinedBins_bin.77	99.92	3.68	0	2	1	2	2	20	NC
1749	SJ082A_Pre_refinedBins_bin.42	69.03	3.68	0	0	0	0	0	15	MQ
1750	SJ086A_Post1_refinedBins_bin.2	70.5	3.68	0	0	0	1	0	13	MQ
1751	UC28_Pre_refinedBins_bin.77	91.86	3.68	4	0	0	1	0	17	NC
1752	BK057A_Post1_refinedBins_bin.79	54.58	3.67	1	1	1	1	0	10	MQ
1753	KR042E_Pre_refinedBins_bin.68	80.46	3.67	1	0	0	2	0	17	MQ
1754	KR067H_Post1_refinedBins_bin.7	94.86	3.67	2	0	0	1	0	20	NC
1755	SJ018A_Pre_refinedBins_bin.9	97.6	3.67	1	0	0	0	0	15	NC
1756	SJ058D_Post1_refinedBins_bin.40	80.61	3.67	0	0	0	0	0	12	MQ
1757	SJ082A_Post2_refinedBins_bin.55	59.07	3.67	1	0	0	1	0	22	MQ
1758	UC35_Pre_refinedBins_bin.12	85.33	3.67	0	0	0	1	0	22	MQ
1759	JC5B_Pre_refinedBins_bin.22	51.76	3.66	0	0	0	0	0	17	MQ
1760	JQ12B_Post1_refinedBins_bin.17	84.83	3.66	0	0	0	1	0	22	MQ
1761	KR005C_Pre_refinedBins_bin.97	79.55	3.66	1	0	0	0	0	11	MQ
1762	LL54D_Pre_refinedBins_bin.56	88.86	3.66	1	1	1	1	1	18	MQ
1763	SJ012A_Post2_refinedBins_bin.16	99.73	3.66	0	0	1	0	0	23	NC
1764	SJ096B_Pre_refinedBins_bin.44	99.68	3.66	0	2	0	1	0	16	NC
1765	BK051A_Post2_refinedBins_bin.6	70.61	3.65	1	0	1	0	0	19	MQ
1766	BK059C_Pre_refinedBins_bin.50	86.03	3.65	1	0	0	0	0	18	MQ
1767	BK13A_Post1_refinedBins_bin.41	95.09	3.65	0	0	0	0	0	14	NC
1768	KR063A_Pre_refinedBins_bin.13	68.25	3.65	0	0	0	0	0	20	MQ
1769	KR107D_Pre_refinedBins_bin.10	82.91	3.65	2	1	0	1	0	22	MQ
1770	SJ031C_Post2_refinedBins_bin.21	57.53	3.65	0	0	0	0	0	9	MQ
1771	SJ040A_Post1_refinedBins_bin.62	74.48	3.65	0	0	0	0	0	21	MQ
1772	SJ054A_Post2_refinedBins_bin.33	98.73	3.65	0	0	0	0	0	20	NC
1773	SJ067A_Post1_refinedBins_bin.15	90.76	3.65	0	0	0	0	1	13	NC
1774	BK56A_Pre_refinedBins_bin.31	77.49	3.64	0	1	0	1	1	15	MQ
1775	JL25B_Post2_refinedBins_bin.8	100	3.64	1	0	0	1	0	18	NC
1776	KR026D_Pre_refinedBins_bin.71	85.05	3.64	2	0	0	0	0	18	MQ
1777	KR091C_Pre_refinedBins_bin.60	99.65	3.64	0	0	0	0	0	19	NC
1778	LL4B_Pre_refinedBins_bin.58	85.64	3.64	0	0	0	2	0	14	MQ
1779	SJ016E_Pre_refinedBins_bin.54	82.98	3.64	1	0	0	0	0	16	MQ
1780	SJ031C_Post1_refinedBins_bin.4	94.91	3.64	1	1	0	2	1	19	HQ
1781	SJ032E_Pre_refinedBins_bin.65	60.62	3.64	0	0	0	1	0	16	MQ
1782	JC6B_Post1_refinedBins_bin.23	66.3	3.63	2	0	0	0	0	8	MQ
1783	KR067E_Post1_refinedBins_bin.29	69.22	3.63	2	0	0	0	0	9	MQ
1784	LL26A_Pre_refinedBins_bin.56	74.82	3.63	0	0	0	0	0	19	MQ
1785	LL31A_Pre_refinedBins_bin.46	75.38	3.63	3	1	0	1	0	12	MQ
1786	SJ025B_Post1_refinedBins_bin.75	93.16	3.63	2	0	0	0	0	21	NC
1787	SJ033A_Post1_refinedBins_bin.12	79.55	3.63	1	0	0	1	0	20	MQ
1788	SJ089B_Post1_refinedBins_bin.47	99.81	3.63	2	0	0	1	0	22	NC
1789	UC21_Pre_refinedBins_bin.29	70.98	3.63	0	0	0	1	0	19	MQ
1790	UC52_Pre_refinedBins_bin.20	84.39	3.63	0	0	0	0	0	17	MQ
1791	JQ12B_Post1_refinedBins_bin.54	99.95	3.62	0	0	0	0	0	18	NC
1792	KR004E_Post2_refinedBins_bin.36	50.5	3.62	0	0	0	0	0	15	MQ
1793	KR067B_Pre_refinedBins_bin.15	57.12	3.62	0	0	0	0	0	15	MQ
1794	LL1C_Pre_refinedBins_bin.72	93.73	3.62	2	0	0	0	0	18	NC
1795	LL53C_Pre_refinedBins_bin.67	86.91	3.62	0	0	2	0	0	23	MQ
1796	SJ003D_Pre_refinedBins_bin.34	91	3.62	1	0	0	0	0	19	NC
1797	SJ043B_Pre_refinedBins_bin.40	73.36	3.62	1	0	0	0	0	19	MQ
1798	SJ054C_Post1_refinedBins_bin.46	78.16	3.62	0	0	0	0	0	17	MQ
1799	SJ067G_Post2_refinedBins_bin.18	65.31	3.62	1	1	0	1	0	18	MQ
1800	UC02_Pre_refinedBins_bin.55	80.64	3.62	0	0	0	0	1	13	MQ
1801	BK11A_Post1_refinedBins_bin.13	80.55	3.61	0	0	0	1	0	23	MQ
1802	BK13A_Pre_refinedBins_bin.26	91.35	3.61	0	0	0	0	0	14	NC
1803	JH2B_Pre_refinedBins_bin.57	54.1	3.61	0	0	0	2	0	9	MQ
1804	JQ3B_Pre_refinedBins_bin.68	59.39	3.61	0	0	0	0	0	13	MQ
1805	KR091A_Pre_refinedBins_bin.18	65.43	3.61	1	1	0	0	0	21	MQ
1806	SJ002A_Pre_refinedBins_bin.24	54.81	3.61	1	0	0	0	0	7	MQ
1807	SJ016E_Post2_refinedBins_bin.61	91.81	3.61	2	0	0	2	0	20	NC
1808	SJ045E_Pre_refinedBins_bin.54	71	3.61	1	0	0	0	0	14	MQ
1809	SJ054A_Post1_refinedBins_bin.13	98.35	3.61	0	0	0	0	0	20	NC
1810	SJ058D_Post1_refinedBins_bin.36	94.77	3.61	1	0	0	1	0	21	NC
1811	SJ082A_Pre_refinedBins_bin.11	86.98	3.61	0	0	0	0	0	24	MQ
1812	SJ089A_Post2_refinedBins_bin.37	56.76	3.61	0	0	0	0	0	10	MQ
1813	UC16_Pre_refinedBins_bin.37	82.86	3.61	1	0	1	0	0	15	MQ
1814	BK10A_Post1_refinedBins_bin.35	79.83	3.6	0	0	0	0	0	13	MQ
1815	BK10A_Post1_refinedBins_bin.37	76.39	3.6	1	0	0	0	0	14	MQ
1816	LL31G_Pre_refinedBins_bin.85	80.02	3.6	1	0	0	0	0	22	MQ
1817	LL4C_Pre_refinedBins_bin.55	79.21	3.6	0	0	0	0	0	20	MQ
1818	LL54B_Pre_refinedBins_bin.63	82.09	3.6	5	0	1	0	0	17	MQ
1819	LL5A_Pre_refinedBins_bin.63	50.94	3.6	1	0	0	0	0	14	MQ
1820	SJ001B_Pre_refinedBins_bin.15	86.79	3.6	0	0	0	0	0	15	MQ
1821	SJ067F_Post2_refinedBins_bin.38	66.6	3.6	1	0	0	2	0	13	MQ
1822	SJ069C_Pre_refinedBins_bin.35	54.62	3.6	1	0	1	0	0	12	MQ
1823	UC08_Pre_refinedBins_bin.36	58.42	3.6	0	1	0	0	0	10	MQ
1824	UC21_Pre_refinedBins_bin.21	85.74	3.6	1	0	0	0	0	22	MQ
1825	BK16B_Pre_refinedBins_bin.3	84.06	3.59	1	1	1	1	0	18	MQ
1826	BK60A_Pre_refinedBins_bin.65	74.95	3.59	0	0	2	1	0	14	MQ
1827	BK60A_Pre_refinedBins_bin.86	79.38	3.59	0	0	0	1	0	23	MQ
1828	JQ19B_Pre_refinedBins_bin.66	95.32	3.59	0	0	0	0	0	18	NC
1829	KR048B_Pre_refinedBins_bin.51	82.66	3.59	2	1	1	1	0	18	MQ
1830	KR069A_Pre_refinedBins_bin.23	84.94	3.59	0	0	0	0	0	16	MQ
1831	LL2B_Pre_refinedBins_bin.53	64.19	3.59	0	0	0	0	0	11	MQ
1832	LL61D_Pre_refinedBins_bin.78	82.55	3.59	0	0	0	1	0	10	MQ
1833	SJ011B_Post2_refinedBins_bin.62	80	3.59	0	0	0	1	0	14	MQ
1834	SJ024A_Post1_refinedBins_bin.56	68.11	3.59	2	0	0	0	0	15	MQ
1835	SJ067F_Post2_refinedBins_bin.5	70.42	3.59	0	0	0	1	0	18	MQ
1836	SJ067G_Post1_refinedBins_bin.38	83.99	3.59	1	0	0	0	0	18	MQ
1837	SJ089B_Post2_refinedBins_bin.99	56.26	3.59	0	0	0	0	0	10	MQ
1838	UC54_Pre_refinedBins_bin.35	94.12	3.59	0	0	0	1	0	22	NC
1839	BK62C_Pre_refinedBins_bin.19	93.86	3.586	1	0	0	1	0	20	NC
1840	BK14A_Pre_refinedBins_bin.22	99.77	3.58	3	0	0	0	0	18	NC
1841	BK8C_Pre_refinedBins_bin.56	99.12	3.58	3	0	0	0	0	19	NC
1842	KR056A_Post1_refinedBins_bin.3	84.55	3.58	0	0	0	0	0	16	MQ
1843	LL1A_Pre_refinedBins_bin.30	70.92	3.58	2	0	1	0	0	20	MQ
1844	SJ016A_Pre_refinedBins_bin.4	71.76	3.58	0	0	0	0	0	13	MQ
1845	SJ067A_Pre_refinedBins_bin.37	87.26	3.58	0	0	0	0	1	16	MQ
1846	SJ088B_Post1_refinedBins_bin.13	69.09	3.58	0	1	1	2	1	21	MQ
1847	SJ016A_Post1_refinedBins_bin.62	50.7	3.579	1	0	1	0	0	7	MQ
1848	BK16C_Pre_refinedBins_bin.12	51.78	3.571	1	0	0	1	0	13	MQ
1849	JC23E_Post1_refinedBins_bin.56	73.21	3.571	2	0	0	1	0	21	MQ
1850	LL48A_Pre_refinedBins_bin.19	50	3.571	0	0	0	1	0	19	MQ
1851	SJ013B_Post1_refinedBins_bin.60	63.71	3.571	2	1	0	0	0	18	MQ
1852	UC69_Pre_refinedBins_bin.71	65.17	3.571	0	0	0	1	0	15	MQ
1853	JC5A_Pre_refinedBins_bin.41	92.21	3.57	0	0	0	1	0	25	NC
1854	LL48A_Pre_refinedBins_bin.47	99.17	3.57	0	0	0	0	1	21	NC
1855	LL73D_Pre_refinedBins_bin.41	63.58	3.57	3	0	0	1	0	17	MQ
1856	SJ021A_Pre_refinedBins_bin.25	75.77	3.57	1	0	0	0	0	13	MQ
1857	UC49_Pre_refinedBins_bin.59	96.87	3.57	2	0	0	0	0	23	NC
1858	BK10A_Post1_refinedBins_bin.57	90.54	3.56	0	0	0	1	0	17	NC
1859	BK21A_Post1_refinedBins_bin.26	89.43	3.56	1	1	1	1	1	20	MQ
1860	JJ7A_Post2_refinedBins_bin.57	76.07	3.56	0	0	0	0	2	13	MQ
1861	JL19A_Post2_refinedBins_bin.10	78.98	3.56	2	0	0	0	0	18	MQ
1862	LL31F_Pre_refinedBins_bin.15	81.39	3.56	1	0	0	0	0	16	MQ
1863	SJ003D_Pre_refinedBins_bin.88	93.05	3.56	1	0	0	1	1	22	NC
1864	SJ054C_Post2_refinedBins_bin.71	97.62	3.56	1	0	1	0	0	18	NC
1865	SJ087A_Pre_refinedBins_bin.3	74.78	3.56	0	0	0	0	0	17	MQ
1866	BK5A_Post1_refinedBins_bin.32	90.77	3.55	1	0	1	0	0	25	NC
1867	LL54D_Pre_refinedBins_bin.47	75.69	3.55	1	0	0	0	0	11	MQ
1868	LL56C_Pre_refinedBins_bin.33	82.19	3.55	0	0	0	0	0	20	MQ
1869	BK054A_Pre_refinedBins_bin.71	74.11	3.54	0	0	0	0	0	17	MQ
1870	JQ19C_Post1_refinedBins_bin.5	87.44	3.54	1	2	0	0	0	20	MQ
1871	JQ2A_Post2_refinedBins_bin.3	70.13	3.54	1	0	0	0	0	15	MQ
1872	JQ4D_Pre_refinedBins_bin.46	61.05	3.54	0	0	0	0	0	16	MQ
1873	KR048B_Post1_refinedBins_bin.33	66.59	3.54	1	0	1	0	0	12	MQ
1874	SJ016D_Post1_refinedBins_bin.66	92	3.54	1	0	0	0	0	15	NC
1875	SJ086A_Post2_refinedBins_bin.2	73.01	3.54	1	0	1	2	0	14	MQ
1876	SJ086A_Pre_refinedBins_bin.75	69.51	3.54	0	0	1	0	1	13	MQ
1877	SJ095B_pre_refinedBins_bin.70	88.53	3.54	1	2	2	0	0	20	MQ
1878	UC54_Pre_refinedBins_bin.50	85.59	3.54	1	1	0	0	0	12	MQ
1879	BK18A_Pre_refinedBins_bin.14	60.97	3.53	0	0	1	0	0	15	MQ
1880	BK54B_Post1_refinedBins_bin.62	94.9	3.53	0	1	1	1	0	17	NC
1881	KR059C_Pre_refinedBins_bin.48	99.99	3.53	1	0	0	0	0	20	NC
1882	KR067H_Post2_refinedBins_bin.20	79.07	3.53	1	0	0	0	0	11	MQ
1883	LL2B_Pre_refinedBins_bin.79	98.67	3.53	2	0	0	1	1	21	NC
1884	LL8D_Pre_refinedBins_bin.34	73.37	3.53	1	2	0	0	0	14	MQ
1885	SJ021A_Pre_refinedBins_bin.76	92.41	3.53	0	0	0	0	0	18	NC
1886	SJ025C_Post2_refinedBins_bin.38	94.96	3.53	0	1	1	0	0	14	NC
1887	SJ058A_Post2_refinedBins_bin.37	92.82	3.53	0	1	0	0	0	18	NC
1888	SJ067E_Post2_refinedBins_bin.75	68.76	3.53	1	0	0	0	0	9	MQ
1889	SJ067G_Post1_refinedBins_bin.53	78.57	3.53	0	0	0	0	0	16	MQ
1890	BK62B_Pre_refinedBins_bin.8	75.54	3.52	0	1	0	1	0	14	MQ
1891	JC6B_Pre_refinedBins_bin.22	54.45	3.52	0	0	0	0	0	14	MQ
1892	JJ7A_Post2_refinedBins_bin.52	73.86	3.52	1	0	0	0	0	19	MQ
1893	KR067G_Pre_refinedBins_bin.98	79.86	3.52	0	1	1	3	1	16	MQ
1894	LL33B_Pre_refinedBins_bin.59	67.49	3.52	2	0	1	2	1	11	MQ
1895	LL70B_Pre_refinedBins_bin.89	78.15	3.52	0	0	0	0	0	15	MQ
1896	SJ003A_Pre_refinedBins_bin.104	77.66	3.52	1	0	0	0	0	13	MQ
1897	SJ013B_Post2_refinedBins_bin.45	75.83	3.52	0	0	1	0	0	21	MQ
1898	SJ086A_Post2_refinedBins_bin.45	66.1	3.52	1	1	0	1	0	18	MQ
1899	UC26_Pre_refinedBins_bin.16	55.17	3.52	0	0	0	0	0	7	MQ
1900	JK35C_Pre_refinedBins_bin.55	74.63	3.51	1	0	0	1	0	21	MQ
1901	LL47A_Pre_refinedBins_bin.41	91.53	3.51	1	1	2	0	0	18	NC
1902	SJ016D_Post1_refinedBins_bin.56	85.12	3.51	0	0	0	0	0	21	MQ
1903	SJ021A_Post1_refinedBins_bin.30	70.86	3.51	0	0	0	0	0	14	MQ
1904	SJ032B_Post2_refinedBins_bin.39	73.09	3.51	0	0	0	2	0	19	MQ
1905	SJ088B_Pre_refinedBins_bin.19	88.17	3.51	1	0	0	0	0	24	MQ
1906	SJ091A_Post1_refinedBins_bin.75	70.21	3.51	0	0	1	0	0	11	MQ
1907	JL23A_Pre_refinedBins_bin.54	56.29	3.508	0	0	0	0	0	6	MQ
1908	KR032A_Post1_refinedBins_bin.100	56.14	3.508	1	0	0	0	0	9	MQ
1909	SJ054C_Pre_refinedBins_bin.48	52.02	3.508	2	0	0	0	0	12	MQ
1910	SJ062B_Pre_refinedBins_bin.7	52.44	3.508	2	0	0	0	0	13	MQ
1911	BK1C_Pre_refinedBins_bin.39	74.67	3.5	1	1	0	0	1	20	MQ
1912	BK60A_Post2_refinedBins_bin.35	77.04	3.5	1	0	0	0	0	16	MQ
1913	JJ7A_Post2_refinedBins_bin.55	99.98	3.5	1	0	0	0	0	22	NC
1914	JK35C_Pre_refinedBins_bin.50	63.46	3.5	0	1	0	0	0	9	MQ
1915	JL25B_Post1_refinedBins_bin.12	86.32	3.5	0	0	0	0	0	18	MQ
1916	KR004F_Post2_refinedBins_bin.76	83.56	3.5	0	0	0	0	0	13	MQ
1917	KR047A_Post1_refinedBins_bin.52	63.7	3.5	1	0	0	0	0	15	MQ
1918	KR067B_Pre_refinedBins_bin.39	54.21	3.5	0	0	0	0	0	14	MQ
1919	SJ020A_Post1_refinedBins_bin.60	78.29	3.5	0	0	0	0	0	21	MQ
1920	SJ021A_Post1_refinedBins_bin.73	86.18	3.5	2	0	0	2	0	14	MQ
1921	SJ024A_Pre_refinedBins_bin.73	90.26	3.5	1	0	0	0	0	22	NC
1922	SJ045A_Pre_refinedBins_bin.10	85.92	3.5	2	0	0	0	0	13	MQ
1923	SJ047A_Pre_refinedBins_bin.60	55.98	3.5	1	0	0	0	0	9	MQ
1924	SJ067E_Post1_refinedBins_bin.18	81	3.5	1	0	0	0	0	21	MQ
1925	SJ067F_Post2_refinedBins_bin.66	100	3.5	0	0	0	0	0	21	NC
1926	SJ082C_Pre_refinedBins_bin.41	91.85	3.5	0	0	0	0	0	21	NC
1927	JC5B_Pre_refinedBins_bin.25	82.82	3.49	3	0	0	0	0	14	MQ
1928	KR095B_Pre_refinedBins_bin.50	53.09	3.49	0	0	0	1	0	11	MQ
1929	LL1A_Pre_refinedBins_bin.43	74.03	3.49	0	0	0	0	0	20	MQ
1930	LL32D_Pre_refinedBins_bin.6	91.92	3.49	1	0	0	0	0	22	NC
1931	SJ011B_Post1_refinedBins_bin.13	93.81	3.49	2	0	0	0	0	21	NC
1932	SJ017A_Pre_refinedBins_bin.2	66.71	3.49	1	0	0	0	0	12	MQ
1933	SJ025B_Pre_refinedBins_bin.6	99.93	3.49	0	0	0	0	0	18	NC
1934	SJ032A_Post2_refinedBins_bin.65	60.09	3.49	0	0	0	0	0	10	MQ
1935	LL61D_Pre_refinedBins_bin.43	50.89	3.488	1	1	1	2	1	9	MQ
1936	BK059C_Pre_refinedBins_bin.37	59.61	3.48	0	0	0	0	0	11	MQ
1937	BK58A_Pre_refinedBins_bin.17	82.19	3.48	0	0	0	0	0	12	MQ
1938	JQ2A_Post2_refinedBins_bin.9	75.12	3.48	1	0	0	0	0	15	MQ
1939	KR042C_Post1_refinedBins_bin.1	99.92	3.48	1	0	0	1	0	22	NC
1940	LL34A_Pre_refinedBins_bin.54	91.75	3.48	1	0	0	0	0	23	NC
1941	LL41B_Pre_refinedBins_bin.20	92.45	3.48	3	0	0	0	0	20	NC
1942	LL42D_Pre_refinedBins_bin.78	94.05	3.48	1	0	0	1	0	21	NC
1943	LL47A_Pre_refinedBins_bin.57	96.47	3.48	0	0	0	0	0	18	NC
1944	LL51E_Pre_refinedBins_bin.4	87.78	3.48	0	0	0	0	0	22	MQ
1945	LL62C_Pre_refinedBins_bin.44	59.19	3.48	3	0	1	0	0	12	MQ
1946	SJ016B_Pre_refinedBins_bin.67	71.11	3.48	1	2	2	0	0	22	MQ
1947	SJ017B_Pre_refinedBins_bin.89	56.9	3.48	0	0	0	0	0	9	MQ
1948	SJ047A_Post1_refinedBins_bin.21	91.45	3.48	2	0	0	1	0	16	NC
1949	SJ067B_Pre_refinedBins_bin.22	100	3.48	0	0	0	0	0	21	NC
1950	BK60A_Post2_refinedBins_bin.86	71.9	3.47	0	0	0	3	1	14	MQ
1951	JQ19C_Post1_refinedBins_bin.80	88.01	3.47	0	0	0	0	0	13	MQ
1952	KR067H_Post2_refinedBins_bin.95	51.05	3.47	0	0	0	0	0	8	MQ
1953	LL13A_Pre_refinedBins_bin.8	85.55	3.47	0	0	0	0	0	9	MQ
1954	LL1B_Pre_refinedBins_bin.88	95.16	3.47	0	0	0	0	0	15	NC
1955	LL9D_Pre_refinedBins_bin.62	82.69	3.47	0	0	0	0	0	16	MQ
1956	SJ016A_Post1_refinedBins_bin.40	81.81	3.47	1	0	0	0	0	11	MQ
1957	SJ016E_Post2_refinedBins_bin.36	76.87	3.47	2	0	0	0	0	11	MQ
1958	SJ017A_Post1_refinedBins_bin.10	100	3.47	0	0	2	1	0	17	NC
1959	SJ032A_Post1_refinedBins_bin.32	75.63	3.47	0	0	0	0	0	19	MQ
1960	SJ048A_Pre_refinedBins_bin.25	98.37	3.47	2	0	0	0	0	21	NC
1961	SJ095B_Post2_refinedBins_bin.2	99.99	3.47	5	0	0	0	0	25	NC
1962	UC36_Pre_refinedBins_bin.51	81.29	3.47	2	0	0	0	0	22	MQ
1963	JL25B_Pre_refinedBins_bin.13	65.57	3.469	1	0	0	0	0	12	MQ
1964	BK102A_Pre_refinedBins_bin.67	81.28	3.46	1	0	0	1	0	15	MQ
1965	BK13A_Post1_refinedBins_bin.59	82.48	3.46	1	0	0	0	0	12	MQ
1966	JC6B_Post2_refinedBins_bin.107	81.31	3.46	1	1	1	0	0	14	MQ
1967	JQ9A_Pre_refinedBins_bin.20	64.44	3.46	1	1	0	0	0	11	MQ
1968	KR047A_Post2_refinedBins_bin.88	95.23	3.46	0	0	0	0	0	17	NC
1969	SJ032D_Pre_refinedBins_bin.82	79.29	3.46	0	0	0	0	0	19	MQ
1970	SJ047A_Post1_refinedBins_bin.1	72.61	3.46	0	0	0	1	0	17	MQ
1971	SJ072B_Post1_refinedBins_bin.49	74.9	3.46	0	0	0	0	0	16	MQ
1972	SJ076B_Pre_refinedBins_bin.43	64.15	3.46	1	0	0	0	0	15	MQ
1973	SJ091B_Post2_refinedBins_bin.77	95.43	3.46	1	0	0	1	0	23	NC
1974	BK16B_Pre_refinedBins_bin.34	99.47	3.45	1	0	0	0	0	17	NC
1975	JL3D_Pre_refinedBins_bin.28	99.99	3.45	0	1	1	0	0	20	NC
1976	JQ19B_Post1_refinedBins_bin.60	82.88	3.45	2	1	1	0	0	19	MQ
1977	KR004F_Pre_refinedBins_bin.50	99.01	3.45	0	0	0	0	0	24	NC
1978	KR048C_Pre_refinedBins_bin.13	73.87	3.45	0	0	0	0	0	16	MQ
1979	LL24B_Pre_refinedBins_bin.47	85.16	3.45	0	1	0	0	0	16	MQ
1980	LL4D_Pre_refinedBins_bin.5	70.51	3.45	1	0	0	0	0	14	MQ
1981	LL61B_Pre_refinedBins_bin.50	76.43	3.45	0	1	1	0	0	15	MQ
1982	LL63A_Pre_refinedBins_bin.79	72.96	3.45	1	1	0	0	0	20	MQ
1983	SJ003C_Post1_refinedBins_bin.29	66.91	3.45	2	0	0	0	0	11	MQ
1984	SJ017A_Post1_refinedBins_bin.48	73.88	3.45	1	0	1	1	1	17	MQ
1985	SJ062B_Pre_refinedBins_bin.14	80.94	3.45	2	0	0	0	0	19	MQ
1986	SJ068B_Post2_refinedBins_bin.59	97.5	3.45	2	0	0	1	0	24	NC
1987	SJ074A_Post1_refinedBins_bin.90	82.22	3.45	0	0	0	2	1	21	MQ
1988	UC05_Pre_refinedBins_bin.98	72.27	3.45	0	0	0	0	0	10	MQ
1989	UC22_Pre_refinedBins_bin.17	60.78	3.45	2	0	0	0	0	17	MQ
1990	UC58_Pre_refinedBins_bin.14	99.97	3.45	1	0	0	0	0	19	NC
1991	UC69_Pre_refinedBins_bin.46	71.5	3.45	1	0	0	0	0	10	MQ
1992	BK29B_Pre_refinedBins_bin.24	71.37	3.448	1	1	0	0	0	21	MQ
1993	BK54B_Pre_refinedBins_bin.30	50	3.448	0	0	0	0	0	16	MQ
1994	BK5A_Post1_refinedBins_bin.49	64.26	3.448	0	0	1	0	0	20	MQ
1995	BK60A_Post2_refinedBins_bin.45	65.29	3.448	2	0	0	0	0	15	MQ
1996	JH9B_Post2_refinedBins_bin.22	56.89	3.448	3	0	1	2	0	9	MQ
1997	KR067H_Post1_refinedBins_bin.24	53.16	3.448	0	0	0	0	0	9	MQ
1998	KR069B_Pre_refinedBins_bin.78	50.26	3.448	0	0	0	0	0	10	MQ
[truncated: 13,869 more rows]

## Sheet: Table 2
Supplementary Table 2: Taxonomic classification of 5,355 prokaryotic MAGs, including both Malaysia-specific bacteria and archaea
	MAGs	MAG status	Kingdom	Phylum	Class	Order	Family	Genus	Species
1	BK051A_Post1_refinedBins_bin.56	Malaysia_MAG	Bacteria	Firmicutes	Bacilli	Erysipelotrichales	Erysipelotrichaceae	Holdemanella	Holdemanella sp900556915
2	BK054A_Pre_refinedBins_bin.34	Known_MAG	Bacteria	Firmicutes_A	Clostridia	Lachnospirales	Lachnospiraceae	Anaerostipes	Anaerostipes hadrus
3	BK054C_Post1_refinedBins_bin.2	Known_MAG	Bacteria	Actinobacteriota	Coriobacteriia	Coriobacteriales	Coriobacteriaceae	Collinsella
4	BK057A_Post1_refinedBins_bin.45	Malaysia_MAG	Bacteria	Proteobacteria	Gammaproteobacteria	Enterobacterales	Pasteurellaceae	Haemophilus_D	Haemophilus_D parainfluenzae
5	BK057A_Pre_refinedBins_bin.44	Malaysia_MAG	Bacteria	Firmicutes	Bacilli	Erysipelotrichales	Coprobacillaceae	Faecalibacillus
6	BK059C_Pre_refinedBins_bin.40	Malaysia_MAG	Bacteria	Firmicutes_A	Clostridia	Christensenellales	CAG-74	Limiplasma	Limiplasma sp900548145
7	BK10A_Post1_refinedBins_bin.19	Malaysia_MAG	Bacteria	Actinobacteriota	Coriobacteriia	Coriobacteriales	QAMH01	QAMH01	QAMH01 sp900756605
8	BK10A_Post2_refinedBins_bin.44	Malaysia_MAG	Bacteria	Firmicutes_A	Clostridia	Oscillospirales	Oscillospiraceae	HGM13006
9	BK10A_Pre_refinedBins_bin.21	Known_MAG	Bacteria	Firmicutes_A	Clostridia	Oscillospirales	Oscillospiraceae	Onthomonas	Onthomonas sp003150485
10	BK11A_Post1_refinedBins_bin.1	Known_MAG	Bacteria	Firmicutes_A	Clostridia	Lachnospirales	Lachnospiraceae	Lachnospira	Lachnospira sp000436535
11	BK11A_Post1_refinedBins_bin.30	Malaysia_MAG	Bacteria	Firmicutes	Bacilli	Lactobacillales	Lactobacillaceae	Companilactobacillus	Companilactobacillus formosensis
12	BK11A_Post1_refinedBins_bin.48	Malaysia_MAG	Bacteria	Firmicutes_C	Negativicutes	Veillonellales	Veillonellaceae	Veillonella	Veillonella nakazawae
13	BK11A_Post1_refinedBins_bin.7	Malaysia_MAG	Bacteria	Firmicutes	Bacilli	Lactobacillales	Lactobacillaceae	Pediococcus	Pediococcus stilesii
14	BK11A_Pre_refinedBins_bin.4	Known_MAG	Bacteria	Actinobacteriota	Coriobacteriia	Coriobacteriales	Coriobacteriaceae	Collinsella	Collinsella sp902362275
4259	MGYG000003731	Known_MAG	Bacteria	Bacteroidota	Bacteroidia	Bacteroidales	Bacteroidaceae	Prevotella	Prevotella amnii
16	BK11B_Pre_refinedBins_bin.35	Known_MAG	Bacteria	Firmicutes	Bacilli	RF39	UBA660	Aphodocola	Aphodocola sp900772415
17	BK13A_Post1_refinedBins_bin.70	Malaysia_MAG	Bacteria	Firmicutes_A	Clostridia	Oscillospirales	Ruminococcaceae	Gemmiger
18	BK14A_Post2_refinedBins_bin.63	Known_MAG	Bacteria	Actinobacteriota	Coriobacteriia	Coriobacteriales	Eggerthellaceae	CAG-1427	CAG-1427 sp000431675
19	BK14A_Post2_refinedBins_bin.79	Malaysia_MAG	Bacteria	Firmicutes_A	Clostridia	Oscillospirales	Ruminococcaceae	UBA1394	UBA1394 sp900066845
20	BK14A_Pre_refinedBins_bin.17	Known_MAG	Bacteria	Firmicutes_A	Clostridia	Oscillospirales	Oscillospiraceae	Scatomorpha	Scatomorpha intestinigallinarum
21	BK14A_Pre_refinedBins_bin.92	Malaysia_MAG	Bacteria	Firmicutes_A	Clostridia	Lachnospirales	Lachnospiraceae	Anaerobutyricum
22	BK16C_Pre_refinedBins_bin.41	Known_MAG	Bacteria	Bacteroidota	Bacteroidia	Bacteroidales	Bacteroidaceae	Bacteroides	Bacteroides fragilis
23	BK16C_Pre_refinedBins_bin.8	Malaysia_MAG	Bacteria	Firmicutes_A	Clostridia	Christensenellales	CAG-74	Limiplasma	Limiplasma sp900548145
24	BK16D_Pre_refinedBins_bin.1	Known_MAG	Bacteria	Firmicutes_A	Clostridia	Lachnospirales	Lachnospiraceae	Coprococcus	Coprococcus eutactus_A
25	BK16D_Pre_refinedBins_bin.51	Known_MAG	Bacteria	Firmicutes_A	Clostridia	Lachnospirales	Lachnospiraceae	Blautia_A	Blautia_A schinkii
26	BK18A_Pre_refinedBins_bin.27	Known_MAG	Bacteria	Actinobacteriota	Coriobacteriia	Coriobacteriales	Atopobiaceae	Parolsenella	Parolsenella sp900543875
27	BK1A_Pre_refinedBins_bin.41	Malaysia_MAG	Bacteria	Proteobacteria	Gammaproteobacteria	Enterobacterales	Enterobacteriaceae	Klebsiella	Klebsiella pneumoniae
28	BK21A_Pre_refinedBins_bin.4	Malaysia_MAG	Bacteria	Firmicutes_A	Clostridia	Lachnospirales	Lachnospiraceae	Enterocloster
29	BK22A_Pre_refinedBins_bin.63	Known_MAG	Bacteria	Firmicutes	Bacilli	Lactobacillales	Streptococcaceae	Streptococcus	Streptococcus salivarius
30	BK29B_Pre_refinedBins_bin.28	Malaysia_MAG	Bacteria	Firmicutes_C	Negativicutes	Veillonellales	Veillonellaceae	Veillonella
31	BK54B_Post2_refinedBins_bin.53	Malaysia_MAG	Bacteria	Firmicutes_A	Clostridia	Oscillospirales	Oscillospiraceae	HGM13006
32	BK54B_Post2_refinedBins_bin.75	Malaysia_MAG	Bacteria	Firmicutes_A	Clostridia	TANB77	CAG-508	CAG-269	CAG-269 sp001916035
33	BK54B_Post2_refinedBins_bin.88	Malaysia_MAG	Bacteria	Firmicutes_A	Clostridia	Oscillospirales	Ruminococcaceae	Ruminococcus_D
34	BK5A_Post1_refinedBins_bin.47	Malaysia_MAG	Bacteria	Bacteroidota	Bacteroidia	Bacteroidales	Bacteroidaceae	Bacteroides
35	BK5A_Post1_refinedBins_bin.70	Known_MAG	Bacteria	Firmicutes_A	Clostridia	Oscillospirales	Ruminococcaceae	Faecalibacterium	Faecalibacterium prausnitzii_D
36	BK5B_Pre_refinedBins_bin.27	Malaysia_MAG	Bacteria	Actinobacteriota	Coriobacteriia	Coriobacteriales	Eggerthellaceae	CAG-1427	CAG-1427 sp900538545
37	BK5B_Pre_refinedBins_bin.9	Known_MAG	Bacteria	Actinobacteriota	Coriobacteriia	Coriobacteriales	Eggerthellaceae	Eggerthella	Eggerthella sp014287365
38	BK62B_Pre_refinedBins_bin.21	Known_MAG	Bacteria	Firmicutes	Bacilli	Erysipelotrichales	Coprobacillaceae	Faecalibacillus	Faecalibacillus sp900544435
39	BK62C_Pre_refinedBins_bin.41	Malaysia_MAG	Bacteria	Firmicutes_A	Clostridia	Lachnospirales	Lachnospiraceae	Anaerostipes
40	BK63A_Post1_refinedBins_bin.63	Known_MAG	Bacteria	Firmicutes_C	Negativicutes	Veillonellales	Megasphaeraceae	Megasphaera	Megasphaera stantonii
41	BK6A_Pre_refinedBins_bin.2	Malaysia_MAG	Bacteria	Firmicutes_A	Clostridia	Oscillospirales	Oscillospiraceae	Evtepia	Evtepia sp004556345
42	JC23C_Post1_refinedBins_bin.53	Malaysia_MAG	Bacteria	Firmicutes_A	Clostridia	Lachnospirales	Lachnospiraceae	Agathobacter	Agathobacter rectalis
43	JC23C_Post1_refinedBins_bin.96	Known_MAG	Bacteria	Firmicutes_A	Clostridia	TANB77	CAG-508	CAG-273	CAG-273 sp003534295
44	JC3B_Pre_refinedBins_bin.4	Known_MAG	Bacteria	Firmicutes_A	Clostridia	Oscillospirales	Ruminococcaceae	Ruminococcus_C	Ruminococcus_C callidus
45	JH12B_Pre_refinedBins_bin.39	Malaysia_MAG	Bacteria	Actinobacteriota	Coriobacteriia	Coriobacteriales	Eggerthellaceae	Ellagibacter
46	JH9B_Post1_refinedBins_bin.30	Malaysia_MAG	Bacteria	Firmicutes_A	Clostridia	Oscillospirales	Acutalibacteraceae	CAG-177	CAG-177 sp000431775
47	JH9B_Post2_refinedBins_bin.69	Malaysia_MAG	Bacteria	Firmicutes_A	Clostridia	Christensenellales	CAG-917	CAG-475	CAG-475 sp000434435
75	JQ2A_Post2_refinedBins_bin.31	Known_MAG	Bacteria	Bacteroidota	Bacteroidia	Bacteroidales	Bacteroidaceae	Prevotella	Prevotella avicola
49	JJ5A_Pre_refinedBins_bin.5	Malaysia_MAG	Bacteria	Firmicutes_A	Clostridia	Peptostreptococcales	Anaerovoracaceae	VUNA01	VUNA01 sp002299625
50	JJ5B_Pre_refinedBins_bin.34	Known_MAG	Bacteria	Firmicutes	Bacilli	Erysipelotrichales	Erysipelotrichaceae	Holdemanella	Holdemanella sp900556915
51	JK14A_Pre_refinedBins_bin.24	Malaysia_MAG	Bacteria	Firmicutes_A	Clostridia	Oscillospirales	Oscillospiraceae	CAG-170	CAG-170 sp000436735
52	JK1A_Pre_refinedBins_bin.36	Known_MAG	Bacteria	Firmicutes_A	Clostridia	Oscillospirales	Acutalibacteraceae	CAG-488	CAG-488 sp000434055
53	JK1A_Pre_refinedBins_bin.5	Known_MAG	Bacteria	Firmicutes_A	Clostridia	Oscillospirales	Ruminococcaceae	Ruminococcus_C
54	JK1A_Pre_refinedBins_bin.55	Known_MAG	Bacteria	Bacteroidota	Bacteroidia	Bacteroidales	Muribaculaceae	Sodaliphilus	Sodaliphilus sp004557565
55	JK1A_Pre_refinedBins_bin.85	Known_MAG	Bacteria	Firmicutes_A	Clostridia	Lachnospirales	Lachnospiraceae	Agathobacter	Agathobacter sp900543445
56	JK35B_Pre_refinedBins_bin.22	Known_MAG	Bacteria	Firmicutes_A	Clostridia	Lachnospirales	Lachnospiraceae	Agathobacter	Agathobacter sp900550545
57	JL19A_Pre_refinedBins_bin.47	Known_MAG	Bacteria	Firmicutes_C	Negativicutes	Veillonellales	Dialisteraceae	UBA1822	UBA1822 sp900545365
58	JL19B_Post2_refinedBins_bin.11	Malaysia_MAG	Bacteria	Firmicutes	Bacilli	Lactobacillales	Streptococcaceae	Streptococcus	Streptococcus vestibularis
59	JL23A_Post1_refinedBins_bin.84	Known_MAG	Bacteria	Firmicutes_A	Clostridia	Oscillospirales	Oscillospiraceae	CAG-103	CAG-103 sp900543625
60	JL23A_Post2_refinedBins_bin.74	Malaysia_MAG	Bacteria	Firmicutes_C	Negativicutes	Veillonellales	Dialisteraceae	Dialister
61	JL23A_Post2_refinedBins_bin.76	Known_MAG	Bacteria	Firmicutes_A	Clostridia	Oscillospirales	Ruminococcaceae	Ruminococcus_C	Ruminococcus_C sp000437175
62	JL23A_Post2_refinedBins_bin.91	Malaysia_MAG	Bacteria	Actinobacteriota	Coriobacteriia	Coriobacteriales	Eggerthellaceae	UMGS1519
63	JL23A_Pre_refinedBins_bin.45	Malaysia_MAG	Bacteria	Firmicutes_C	Negativicutes	Veillonellales	Megasphaeraceae	Megasphaera
64	JL25B_Post1_refinedBins_bin.40	Known_MAG	Bacteria	Firmicutes_A	Clostridia	Oscillospirales	Acutalibacteraceae	Eubacterium_R	Eubacterium_R sp000436835
65	JL25B_Post2_refinedBins_bin.7	Known_MAG	Bacteria	Firmicutes	Bacilli	Erysipelotrichales	Erysipelotrichaceae	Holdemanella	Holdemanella sp900547815
66	JL25B_Post2_refinedBins_bin.73	Malaysia_MAG	Bacteria	Verrucomicrobiota	Verrucomicrobiae	Verrucomicrobiales	Akkermansiaceae	Akkermansia	Akkermansia muciniphila
67	JL6C_Pre_refinedBins_bin.55	Malaysia_MAG	Bacteria	Cyanobacteria	Vampirovibrionia	Gastranaerophilales	Gastranaerophilaceae	Zag111
68	JQ12A_Pre_refinedBins_bin.11	Known_MAG	Bacteria	Firmicutes_A	Clostridia	Oscillospirales	Acutalibacteraceae	UBA1417	UBA1417 sp900549945
69	JQ12B_Post1_refinedBins_bin.63	Malaysia_MAG	Bacteria	Proteobacteria	Gammaproteobacteria	Enterobacterales	Enterobacteriaceae	Escherichia	Escherichia coli
70	JQ19B_Post1_refinedBins_bin.10	Known_MAG	Bacteria	Firmicutes_A	Clostridia	Lachnospirales	Lachnospiraceae	Oliverpabstia	Oliverpabstia faecicola
71	JQ19B_Post1_refinedBins_bin.39	Known_MAG	Bacteria	Firmicutes_A	Clostridia	Lachnospirales	Lachnospiraceae	Anaerobutyricum	Anaerobutyricum soehngenii
72	JQ19B_Post1_refinedBins_bin.68	Known_MAG	Bacteria	Actinobacteriota	Coriobacteriia	Coriobacteriales	Coriobacteriaceae	Collinsella	Collinsella intestinalis
73	JQ19B_Post2_refinedBins_bin.11	Known_MAG	Bacteria	Proteobacteria	Gammaproteobacteria	Burkholderiales	Burkholderiaceae	Parasutterella	Parasutterella excrementihominis
74	JQ19B_Post2_refinedBins_bin.37	Malaysia_MAG	Bacteria	Firmicutes_A	Clostridia	Oscillospirales	Ruminococcaceae	Faecalibacterium
4290	MGYG000003765	Known_MAG	Bacteria	Bacteroidota	Bacteroidia	Bacteroidales	Bacteroidaceae	Prevotella	Prevotella bergensis
76	JQ2A_Post2_refinedBins_bin.36	Malaysia_MAG	Bacteria	Firmicutes_A	Clostridia	Oscillospirales	Ruminococcaceae	Ruminococcus_D	Ruminococcus_D bicirculans
77	JQ3B_Post1_refinedBins_bin.37	Malaysia_MAG	Bacteria	Firmicutes_A	Clostridia	Clostridiales	Clostridiaceae	Clostridium_P
78	JQ3B_Post1_refinedBins_bin.83	Known_MAG	Bacteria	Firmicutes_A	Clostridia	TANB77	CAG-465	CAG-465	CAG-465 sp000433755
79	JQ4A_Post1_refinedBins_bin.43	Malaysia_MAG	Bacteria	Firmicutes_A	Clostridia	Oscillospirales	Ruminococcaceae	Ruminococcus_C	Ruminococcus_C sp000433635
80	JQ4A_Post2_refinedBins_bin.110	Known_MAG	Bacteria	Bacteroidota	Bacteroidia	Bacteroidales	Muribaculaceae	Sodaliphilus
81	JQ4B_Post1_refinedBins_bin.41	Malaysia_MAG	Bacteria	Firmicutes_A	Clostridia	Lachnospirales	Lachnospiraceae	Anaerobutyricum
82	JQ4B_Post1_refinedBins_bin.49	Malaysia_MAG	Bacteria	Firmicutes_A	Clostridia	Lachnospirales	Lachnospiraceae	CAG-317
83	JQ4E_Pre_refinedBins_bin.2	Malaysia_MAG	Bacteria	Firmicutes_A	Clostridia	Lachnospirales	Lachnospiraceae	Lachnospira
84	JQ9A_Pre_refinedBins_bin.45	Malaysia_MAG	Bacteria	Firmicutes_A	Clostridia	Christensenellales	CAG-74	Faecivicinus
85	KIJ_genome_10030	Known_MAG	Bacteria	Firmicutes_A	Clostridia	Peptostreptococcales	Anaerovoracaceae	Emergencia	Emergencia timonensis
86	KIJ_genome_10049	Known_MAG	Bacteria	Firmicutes_A	Clostridia	Christensenellales	Borkfalkiaceae	Coproplasma	Coproplasma stercoravium
87	KIJ_genome_10080	Known_MAG	Bacteria	Firmicutes_A	Clostridia	Oscillospirales	Oscillospiraceae	Dysosmobacter	Dysosmobacter sp900542115
88	KIJ_genome_10096	Known_MAG	Bacteria	Firmicutes_C	Negativicutes	Veillonellales	Dialisteraceae	UBA5809	UBA5809 sp002417965
89	KIJ_genome_10103	Known_MAG	Bacteria	Firmicutes_A	Clostridia	TANB77	CAG-508	CAG-273	CAG-273 sp000438355
90	KIJ_genome_10137	Known_MAG	Bacteria	Firmicutes_A	Clostridia	Oscillospirales	Oscillospiraceae	Dysosmobacter	Dysosmobacter avistercoris
91	KIJ_genome_10166	Known_MAG	Bacteria	Firmicutes	Bacilli	Lactobacillales	Lactobacillaceae	Lactobacillus	Lactobacillus amylovorus
92	KIJ_genome_10170	Known_MAG	Bacteria	Firmicutes_A	Clostridia	Oscillospirales	Acutalibacteraceae	Eubacterium_R	Eubacterium_R sp000436835
93	KIJ_genome_10174	Known_MAG	Bacteria	Firmicutes	Bacilli	Lactobacillales	Enterococcaceae	Enterococcus_B	Enterococcus_B lactis
94	KIJ_genome_10177	Known_MAG	Bacteria	Firmicutes_A	Clostridia	Christensenellales	CAG-74	Alectryocaccomicrobium	Alectryocaccomicrobium faecavium
95	KIJ_genome_1018	Known_MAG	Bacteria	Firmicutes_A	Clostridia	Christensenellales	Christensenellaceae	QANA01	QANA01 sp900554725
647	KIJ_genome_21466	Known_MAG	Bacteria	Bacteroidota	Bacteroidia	Bacteroidales	Bacteroidaceae	Prevotella	Prevotella bivia
97	KIJ_genome_10185	Known_MAG	Bacteria	Firmicutes_A	Clostridia	Lachnospirales	Lachnospiraceae	CAG-56	CAG-56 sp900762665
98	KIJ_genome_10197	Known_MAG	Bacteria	Firmicutes_A	Clostridia	Peptostreptococcales	Anaerovoracaceae	Alangreenwoodia
99	KIJ_genome_10199	Known_MAG	Bacteria	Bacteroidota	Bacteroidia	Bacteroidales	UBA11471	UBA11471	UBA11471 sp000434215
100	KIJ_genome_10221	Known_MAG	Bacteria	Firmicutes_A	Clostridia	Oscillospirales	Ruminococcaceae	Anaerotruncus	Anaerotruncus massiliensis
101	KIJ_genome_10236	Known_MAG	Bacteria	Bacteroidota	Bacteroidia	Bacteroidales	UBA11471	UBA11471	UBA11471 sp000434215
102	KIJ_genome_10245	Known_MAG	Bacteria	Firmicutes_A	Clostridia	Lachnospirales	Lachnospiraceae	Enterocloster	Enterocloster bolteae
3957	MGYG000003374	Known_MAG	Bacteria	Bacteroidota	Bacteroidia	Bacteroidales	Bacteroidaceae	Prevotella	Prevotella bivia
104	KIJ_genome_10426	Known_MAG	Bacteria	Firmicutes_A	Clostridia	Lachnospirales	Anaerotignaceae	Anaerotignum	Anaerotignum faecicola
105	KIJ_genome_10431	Known_MAG	Bacteria	Firmicutes_A	Clostridia	Tissierellales	Peptoniphilaceae	Ezakiella	Ezakiella coagulans
106	KIJ_genome_10436	Known_MAG	Bacteria	Firmicutes	Bacilli	RF39	UBA660	CAG-877	CAG-877 sp900768815
107	KIJ_genome_10463	Known_MAG	Bacteria	Proteobacteria	Gammaproteobacteria	Burkholderiales	Burkholderiaceae	Aphodousia
108	KIJ_genome_10480	Known_MAG	Bacteria	Firmicutes_A	Clostridia	TANB77	CAG-508	Merdicola	Merdicola sp900552655
109	KIJ_genome_1050	Known_MAG	Bacteria	Bacteroidota	Bacteroidia	Bacteroidales	Muribaculaceae	Limisoma	Limisoma sp000437795
110	KIJ_genome_10510	Known_MAG	Bacteria	Actinobacteriota	Coriobacteriia	Coriobacteriales	Coriobacteriaceae	Collinsella	Collinsella sp900543275
111	KIJ_genome_10571	Known_MAG	Bacteria	Firmicutes_A	Clostridia	Oscillospirales	Acutalibacteraceae	Acutalibacter	Acutalibacter ornithocaccae
112	KIJ_genome_10572	Known_MAG	Bacteria	Firmicutes_A	Clostridia	Oscillospirales	Ruminococcaceae	Avimicrobium	Avimicrobium sp900761965
113	KIJ_genome_1058	Known_MAG	Bacteria	Proteobacteria	Alphaproteobacteria	RF32	CAG-239	Scatocola
114	KIJ_genome_10587	Known_MAG	Bacteria	Proteobacteria	Alphaproteobacteria	RF32	UBA3637	CAAHEQ01	CAAHEQ01 sp900772625
115	KIJ_genome_10594	Known_MAG	Bacteria	Bacteroidota	Bacteroidia	Bacteroidales	Muribaculaceae	UBA7173	UBA7173 sp910584365
116	KIJ_genome_10597	Known_MAG	Bacteria	Firmicutes_C	Negativicutes	Acidaminococcales	Acidaminococcaceae	Acidaminococcus	Acidaminococcus fermentans
117	KIJ_genome_10645	Known_MAG	Bacteria	Cyanobacteria	Vampirovibrionia	Gastranaerophilales	Gastranaerophilaceae	RUG841	RUG841 sp900772035
118	KIJ_genome_10670	Known_MAG	Bacteria	Firmicutes_A	Clostridia	Oscillospirales	Oscillospiraceae	CAG-83	CAG-83 sp003487665
119	KIJ_genome_10677	Known_MAG	Bacteria	Firmicutes_A	Clostridia	Lachnospirales	Anaerotignaceae	Anaerotignum	Anaerotignum sp001304995
120	KIJ_genome_10729	Known_MAG	Bacteria	Firmicutes_A	Clostridia	Lachnospirales	Lachnospiraceae	Faecalimonas	Faecalimonas sp900556835
121	KIJ_genome_10766	Known_MAG	Bacteria	Firmicutes_A	Clostridia	Oscillospirales	Ruminococcaceae	Ruminococcus_D	Ruminococcus_D bicirculans
122	KIJ_genome_10776	Known_MAG	Bacteria	Proteobacteria	Gammaproteobacteria	Burkholderiales	Burkholderiaceae	Aphodousia	Aphodousia secunda_A
123	KIJ_genome_10801	Known_MAG	Bacteria	Firmicutes	Bacilli	Bacillales	Bacillaceae	Bacillus	Bacillus velezensis
124	KIJ_genome_10818	Known_MAG	Bacteria	Firmicutes_A	Clostridia	Oscillospirales	Oscillospiraceae	Faecousia	Faecousia sp000434635
125	KIJ_genome_10847	Known_MAG	Bacteria	Actinobacteriota	Coriobacteriia	Coriobacteriales	Eggerthellaceae	Senegalimassilia	Senegalimassilia anaerobia
126	KIJ_genome_10870	Known_MAG	Bacteria	Fusobacteriota	Fusobacteriia	Fusobacteriales	Fusobacteriaceae	Fusobacterium_A	Fusobacterium_A sp900555485
127	KIJ_genome_10875	Known_MAG	Bacteria	Firmicutes	Bacilli	RF39	UBA660	CAG-302	CAG-302 sp000431795
128	KIJ_genome_10887	Known_MAG	Bacteria	Proteobacteria	Gammaproteobacteria	Enterobacterales	Pasteurellaceae	Haemophilus_D	Haemophilus_D sp001815355
129	KIJ_genome_10942	Known_MAG	Bacteria	Firmicutes_A	Clostridia	Christensenellales	QAND01	UMGS1975	UMGS1975 sp900546685
130	KIJ_genome_10960	Known_MAG	Bacteria	Firmicutes_A	Clostridia	Oscillospirales	Butyricicoccaceae	Butyricicoccus	Butyricicoccus pullicaecorum
131	KIJ_genome_10999	Known_MAG	Bacteria	Bacteroidota	Bacteroidia	Bacteroidales	Rikenellaceae	Alistipes	Alistipes merdipullorum
132	KIJ_genome_11000	Known_MAG	Bacteria	Firmicutes_A	Clostridia	Oscillospirales	CAG-272
133	KIJ_genome_1102	Known_MAG	Bacteria	Desulfobacterota_I	Desulfovibrionia	Desulfovibrionales	Desulfovibrionaceae	Mailhella
134	KIJ_genome_11035	Known_MAG	Bacteria	Firmicutes_A	Clostridia	Lachnospirales	Lachnospiraceae	Mediterraneibacter
135	KIJ_genome_11058	Known_MAG	Bacteria	Firmicutes_A	Clostridia	Oscillospirales	Oscillospiraceae	Scatomorpha	Scatomorpha stercorigallinarum
136	KIJ_genome_11065	Known_MAG	Bacteria	Actinobacteriota	Actinomycetia	Actinomycetales	Actinomycetaceae	Pauljensenia	Pauljensenia odontolytica_B
137	KIJ_genome_11092	Known_MAG	Bacteria	Firmicutes_A	Clostridia	Oscillospirales	Ruminococcaceae	Avimicrobium	Avimicrobium caecorum
138	KIJ_genome_11113	Known_MAG	Bacteria	Firmicutes_A	Clostridia	Lachnospirales	Lachnospiraceae	Roseburia	Roseburia intestinalis
139	KIJ_genome_11135	Known_MAG	Bacteria	Firmicutes_A	Clostridia	Lachnospirales	Lachnospiraceae	Butyribacter	Butyribacter sp003524945
4288	MGYG000003763	Known_MAG	Bacteria	Bacteroidota	Bacteroidia	Bacteroidales	Bacteroidaceae	Prevotella	Prevotella brunnea
141	KIJ_genome_11173	Known_MAG	Bacteria	Verrucomicrobiota	Verrucomicrobiae	Verrucomicrobiales	Akkermansiaceae	Akkermansia	Akkermansia muciniphila_B
142	KIJ_genome_1122	Known_MAG	Bacteria	Actinobacteriota	Coriobacteriia	Coriobacteriales	Coriobacteriaceae	Collinsella
143	KIJ_genome_11250	Known_MAG	Bacteria	Firmicutes_A	Clostridia	Christensenellales	CAG-74
144	KIJ_genome_11268	Known_MAG	Bacteria	Firmicutes_A	Clostridia	Christensenellales	CAG-74	Ventricola	Ventricola intestinavium
145	KIJ_genome_11306	Known_MAG	Bacteria	Firmicutes_A	Clostridia	Lachnospirales	Lachnospiraceae	Fimimorpha
146	KIJ_genome_11315	Known_MAG	Bacteria	Firmicutes_A	Clostridia	Lachnospirales	Anaerotignaceae	Anaerotignum	Anaerotignum lactatifermentans
147	KIJ_genome_11366	Known_MAG	Bacteria	Bacteroidota	Bacteroidia	Bacteroidales	Bacteroidaceae	Paraprevotella	Paraprevotella xylaniphila
148	KIJ_genome_11402	Known_MAG	Bacteria	Firmicutes_A	Clostridia	Christensenellales	QALW01	QALW01	QALW01 sp900547955
149	KIJ_genome_11406	Known_MAG	Bacteria	Firmicutes_A	Clostridia	Peptostreptococcales	Peptostreptococcaceae	Peptostreptococcus	Peptostreptococcus sp900759325
150	KIJ_genome_11439	Known_MAG	Bacteria	Firmicutes_A	Clostridia	Christensenellales	Christensenellaceae	QAKS01	QAKS01 sp003343685
151	KIJ_genome_11504	Known_MAG	Bacteria	Firmicutes_A	Clostridia	Oscillospirales	Ruminococcaceae	Gemmiger	Gemmiger avistercoris
152	KIJ_genome_11513	Known_MAG	Bacteria	Firmicutes_A	Clostridia	Oscillospirales	Ruminococcaceae	Ruminococcus_D	Ruminococcus_D sp000434695
153	KIJ_genome_11570	Known_MAG	Bacteria	Firmicutes_C	Negativicutes	Veillonellales	Dialisteraceae	Dialister	Dialister sp000434475
154	KIJ_genome_11572	Known_MAG	Bacteria	Firmicutes_A	Clostridia	Oscillospirales	Oscillospiraceae	Lawsonibacter	Lawsonibacter sp900066825
155	KIJ_genome_11602	Known_MAG	Bacteria	Firmicutes_A	Clostridia	Lachnospirales	Anaerotignaceae	Metalachnospira	Metalachnospira gallinarum
156	KIJ_genome_11615	Known_MAG	Bacteria	Bacteroidota	Bacteroidia	Bacteroidales	Muribaculaceae	CAG-485	CAG-485 sp910584125
157	KIJ_genome_11618	Known_MAG	Bacteria	Firmicutes_A	Clostridia	Lachnospirales	Anaerotignaceae	Metalachnospira
158	KIJ_genome_11718	Known_MAG	Bacteria	Firmicutes_A	Clostridia	Lachnospirales	Lachnospiraceae	Lachnospira	Lachnospira sp900551945
159	KIJ_genome_11759	Known_MAG	Bacteria	Actinobacteriota	Coriobacteriia	Coriobacteriales	Coriobacteriaceae	Collinsella	Collinsella sp900541695
160	KIJ_genome_11834	Known_MAG	Bacteria	Firmicutes_A	Clostridia	Lachnospirales	Anaerotignaceae	Metalachnospira	Metalachnospira sp902406135
161	KIJ_genome_11853	Known_MAG	Bacteria	Firmicutes_A	Clostridia	TANB77	CAG-508	CAG-269	CAG-269 sp900556345
162	KIJ_genome_11922	Known_MAG	Bacteria	Firmicutes	Bacilli	Erysipelotrichales	Erysipelotrichaceae	Clostridium_AQ	Clostridium_AQ innocuum
163	KIJ_genome_11925	Known_MAG	Bacteria	Firmicutes_A	Clostridia	Oscillospirales	Ruminococcaceae	Ruminococcus_D	Ruminococcus_D sp900543145
164	KIJ_genome_11926	Known_MAG	Bacteria	Firmicutes_A	Clostridia	Oscillospirales	Ruminococcaceae	Ruminococcus_D	Ruminococcus_D bicirculans
165	KIJ_genome_11960	Known_MAG	Bacteria	Elusimicrobiota	Elusimicrobia	Elusimicrobiales	Elusimicrobiaceae	Avelusimicrobium	Avelusimicrobium excrementipullorum
166	KIJ_genome_12015	Known_MAG	Bacteria	Firmicutes_A	Clostridia	Peptostreptococcales	Anaerovoracaceae	Copromorpha	Copromorpha sp900066305
167	KIJ_genome_12019	Known_MAG	Bacteria	Firmicutes	Bacilli	RF39	UBA660	CAG-628	CAG-628 sp003524085
168	KIJ_genome_12034	Known_MAG	Bacteria	Firmicutes	Bacilli	RF39	UBA660	Onthocola_B
169	KIJ_genome_12042	Known_MAG	Bacteria	Firmicutes_A	Clostridia	Lachnospirales	Lachnospiraceae	Blautia	Blautia pullistercoris
170	KIJ_genome_12045	Known_MAG	Bacteria	Firmicutes_A	Clostridia	Lachnospirales	Lachnospiraceae	Frisingicoccus	Frisingicoccus sp900753685
171	KIJ_genome_12048	Known_MAG	Bacteria	Firmicutes_A	Clostridia	Christensenellales	Borkfalkiaceae	Coproplasma	Coproplasma stercorigallinarum
172	KIJ_genome_12063	Known_MAG	Bacteria	Actinobacteriota	Coriobacteriia	Coriobacteriales	Eggerthellaceae	Aphodovivens
173	KIJ_genome_12096	Known_MAG	Bacteria	Firmicutes_A	Clostridia	Oscillospirales	Oscillospiraceae	Lawsonibacter	Lawsonibacter sp900766145
174	KIJ_genome_12132	Known_MAG	Bacteria	Firmicutes_A	Clostridia	Lachnospirales	Lachnospiraceae	Mediterraneibacter	Mediterraneibacter intestinigallinarum
175	KIJ_genome_12157	Known_MAG	Bacteria	Firmicutes	Bacilli	Erysipelotrichales	Erysipelotrichaceae	Merdibacter	Merdibacter merdipullorum
176	KIJ_genome_12197	Known_MAG	Bacteria	Firmicutes_C	Negativicutes	Veillonellales	Veillonellaceae	Veillonella_A	Veillonella_A seminalis
177	KIJ_genome_12210	Known_MAG	Bacteria	Firmicutes_C	Negativicutes	Veillonellales	Veillonellaceae	Veillonella
178	KIJ_genome_1222	Known_MAG	Bacteria	Actinobacteriota	Coriobacteriia	Coriobacteriales	Eggerthellaceae	CAG-1427	CAG-1427 sp900538545
179	KIJ_genome_1224	Known_MAG	Bacteria	Firmicutes_A	Clostridia	Oscillospirales	Ruminococcaceae	UBA3818	UBA3818 sp900557155
180	KIJ_genome_12263	Known_MAG	Bacteria	Firmicutes_C	Negativicutes	Veillonellales	Veillonellaceae	Veillonella
181	KIJ_genome_12267	Known_MAG	Bacteria	Firmicutes_A	Clostridia	Lachnospirales	Lachnospiraceae	Blautia_A	Blautia_A caecimuris
182	KIJ_genome_12293	Known_MAG	Bacteria	Firmicutes_A	Clostridia	Monoglobales	Monoglobaceae	Roslinia
183	KIJ_genome_12296	Known_MAG	Bacteria	Actinobacteriota	Coriobacteriia	Coriobacteriales	Eggerthellaceae	Raoultibacter	Raoultibacter timonensis
184	KIJ_genome_12305	Known_MAG	Bacteria	Actinobacteriota	Actinomycetia	Actinomycetales	Bifidobacteriaceae	Alloscardovia
185	KIJ_genome_12313	Known_MAG	Bacteria	Fusobacteriota	Fusobacteriia	Fusobacteriales	Fusobacteriaceae	Fusobacterium_A	Fusobacterium_A ulcerans_A
186	KIJ_genome_12332	Known_MAG	Bacteria	Firmicutes_A	Clostridia	Oscillospirales	Acutalibacteraceae	UBA1417	UBA1417 sp900549945
187	KIJ_genome_1234	Known_MAG	Bacteria	Patescibacteria	Saccharimonadia	Saccharimonadales	Nanosynbacteraceae	Nanosynbacter
188	KIJ_genome_12353	Known_MAG	Bacteria	Actinobacteriota	Coriobacteriia	Coriobacteriales	Coriobacteriaceae	Collinsella
189	KIJ_genome_1238	Known_MAG	Bacteria	Bacteroidota	Bacteroidia	Bacteroidales	Rikenellaceae	Alistipes	Alistipes putredinis
190	KIJ_genome_12380	Known_MAG	Bacteria	Firmicutes_C	Negativicutes	Veillonellales	Megasphaeraceae	Anaeroglobus	Anaeroglobus micronuciformis
191	KIJ_genome_12382	Known_MAG	Bacteria	Firmicutes_A	Clostridia	UBA1381	UBA1381	CAG-41	CAG-41 sp900066215
192	KIJ_genome_12388	Known_MAG	Bacteria	Firmicutes_A	Clostridia	Oscillospirales	Acutalibacteraceae	UBA737	UBA737 sp900549055
193	KIJ_genome_12407	Known_MAG	Bacteria	Firmicutes_A	Clostridia	Oscillospirales	CAG-272	Firm-07	Firm-07 sp900548735
194	KIJ_genome_12418	Known_MAG	Bacteria	Firmicutes_A	Clostridia	Oscillospirales	Oscillospiraceae	CAG-170	CAG-170 sp000432135
195	KIJ_genome_12438	Known_MAG	Bacteria	Firmicutes_A	Clostridia	Lachnospirales	Anaerotignaceae	Anaerotignum	Anaerotignum lactatifermentans
196	KIJ_genome_12499	Known_MAG	Bacteria	Firmicutes_A	Clostridia	Oscillospirales	Ruminococcaceae	Ruthenibacterium
197	KIJ_genome_12500	Known_MAG	Bacteria	Firmicutes_A	Clostridia	Christensenellales	QALW01	UMGS1338	UMGS1338 sp900550805
198	KIJ_genome_12534	Known_MAG	Bacteria	Firmicutes_A	Clostridia	Clostridiales	Clostridiaceae	Clostridium
199	KIJ_genome_12568	Known_MAG	Bacteria	Bacteroidota	Bacteroidia	Bacteroidales	Muribaculaceae	Limisoma	Limisoma sp900544305
200	KIJ_genome_12582	Known_MAG	Bacteria	Bacteroidota	Bacteroidia	Bacteroidales	Bacteroidaceae	UBA4372	UBA4372 sp900543815
201	KIJ_genome_12625	Known_MAG	Bacteria	Verrucomicrobiota	Lentisphaeria	Victivallales	Victivallaceae	Victivallis	Victivallis lenta
202	KIJ_genome_12687	Known_MAG	Bacteria	Firmicutes_A	Clostridia	Lachnospirales	Lachnospiraceae	Eisenbergiella	Eisenbergiella sp900066775
203	KIJ_genome_12738	Known_MAG	Bacteria	Firmicutes_A	Clostridia	Lachnospirales	Anaerotignaceae
204	KIJ_genome_12749	Known_MAG	Bacteria	Bacteroidota	Bacteroidia	Bacteroidales	Bacteroidaceae	Phocaeicola	Phocaeicola sp000434735
205	KIJ_genome_12762	Known_MAG	Bacteria	Proteobacteria	Alphaproteobacteria	RF32	CAG-977	UBA11549
206	KIJ_genome_12768	Known_MAG	Bacteria	Firmicutes_A	Clostridia	Lachnospirales	Lachnospiraceae	RUG115	RUG115 sp900066395
207	KIJ_genome_12795	Known_MAG	Bacteria	Firmicutes_A	Clostridia	Oscillospirales	Oscillospiraceae	Flavonifractor	Flavonifractor avicola
208	KIJ_genome_12823	Known_MAG	Bacteria	Firmicutes_A	Clostridia	Christensenellales	CAG-74	Pullichristensenella	Pullichristensenella sp904420265
209	KIJ_genome_12848	Known_MAG	Bacteria	Firmicutes_A	Clostridia	Lachnospirales	Lachnospiraceae	Mediterraneibacter_A
210	KIJ_genome_12861	Known_MAG	Bacteria	Firmicutes_A	Clostridia	Christensenellales	Borkfalkiaceae	Gallimonas	Gallimonas merdae
1349	KIJ_genome_9092	Known_MAG	Bacteria	Bacteroidota	Bacteroidia	Bacteroidales	Bacteroidaceae	Prevotella	Prevotella buccae
212	KIJ_genome_12889	Known_MAG	Bacteria	Firmicutes_A	Clostridia	Oscillospirales	Acutalibacteraceae	Acutalibacter	Acutalibacter sp904419785
213	KIJ_genome_12918	Known_MAG	Bacteria	Firmicutes_A	Clostridia	Oscillospirales	Ruminococcaceae	Ruminococcus_D	Ruminococcus_D sp900752625
214	KIJ_genome_1293	Known_MAG	Bacteria	Actinobacteriota	Coriobacteriia	Coriobacteriales	Coriobacteriaceae	Collinsella	Collinsella sp900545445
215	KIJ_genome_12933	Known_MAG	Bacteria	Proteobacteria	Gammaproteobacteria	Burkholderiales	Burkholderiaceae	Sutterella	Sutterella merdavium
216	KIJ_genome_12937	Known_MAG	Bacteria	Firmicutes	Bacilli	Erysipelotrichales	Coprobacillaceae	Massiliomicrobiota
4269	MGYG000003742	Known_MAG	Bacteria	Bacteroidota	Bacteroidia	Bacteroidales	Bacteroidaceae	Prevotella	Prevotella buccalis
218	KIJ_genome_13033	Known_MAG	Bacteria	Cyanobacteria	Vampirovibrionia	Gastranaerophilales	Gastranaerophilaceae	Spyradomonas	Spyradomonas excrementavium
219	KIJ_genome_13062	Known_MAG	Bacteria	Firmicutes_A	Clostridia	Christensenellales	CAG-138	UBA1685	UBA1685 sp002320595
220	KIJ_genome_13064	Known_MAG	Bacteria	Firmicutes_A	Clostridia	Oscillospirales	QAMX01	QAMX01	QAMX01 sp004555605
221	KIJ_genome_13113	Known_MAG	Bacteria	Firmicutes_A	Clostridia	Oscillospirales	Oscillospiraceae	Dysosmobacter	Dysosmobacter pullicola
222	KIJ_genome_13116	Known_MAG	Bacteria	Firmicutes_A	Clostridia	Oscillospirales	Acutalibacteraceae	Acutalibacter	Acutalibacter ornithocaccae
223	KIJ_genome_13132	Known_MAG	Bacteria	Proteobacteria	Gammaproteobacteria	Enterobacterales	Aeromonadaceae	Aeromonas	Aeromonas caviae
224	KIJ_genome_13254	Known_MAG	Bacteria	Actinobacteriota	Coriobacteriia	Coriobacteriales	Eggerthellaceae	Gordonibacter	Gordonibacter pamelaeae
225	KIJ_genome_13287	Known_MAG	Bacteria	Firmicutes_A	Clostridia	Christensenellales	Borkfalkiaceae	UBA10281	UBA10281 sp900767815
226	KIJ_genome_13303	Known_MAG	Bacteria	Actinobacteriota	Actinomycetia	Actinomycetales	Actinomycetaceae	Pauljensenia	Pauljensenia sp000278725
227	KIJ_genome_13336	Known_MAG	Bacteria	Proteobacteria	Gammaproteobacteria	Burkholderiales	Burkholderiaceae	Turicimonas	Turicimonas sp900542195
228	KIJ_genome_13337	Known_MAG	Bacteria	Desulfobacterota_I	Desulfovibrionia	Desulfovibrionales	Desulfovibrionaceae	Desulfovibrio
229	KIJ_genome_13351	Known_MAG	Bacteria	Actinobacteriota	Coriobacteriia	Coriobacteriales	Coriobacteriaceae	Collinsella
230	KIJ_genome_13368	Known_MAG	Bacteria	Firmicutes_A	Clostridia	Lachnospirales	Anaerotignaceae	Metalachnospira	Metalachnospira sp900548595
231	KIJ_genome_13377	Known_MAG	Bacteria	Proteobacteria	Gammaproteobacteria	Enterobacterales	Vibrionaceae	Photobacterium	Photobacterium damselae
232	KIJ_genome_1339	Known_MAG	Bacteria	Firmicutes_A	Clostridia	Oscillospirales	Ruminococcaceae	Merdivicinus	Merdivicinus sp900555435
233	KIJ_genome_13395	Known_MAG	Bacteria	Actinobacteriota	Coriobacteriia	Coriobacteriales	Atopobiaceae	Coprovicinus	Coprovicinus avistercoris
234	KIJ_genome_13440	Known_MAG	Bacteria	Desulfobacterota_I	Desulfovibrionia	Desulfovibrionales	Desulfovibrionaceae	Bilophila	Bilophila sp902373525
235	KIJ_genome_13501	Known_MAG	Bacteria	Firmicutes_B	Dehalobacteriia	UBA7702	UBA7702	Cryptoclostridium
236	KIJ_genome_13519	Known_MAG	Bacteria	Firmicutes_A	Clostridia	Lachnospirales	Anaerotignaceae	UBA8514
237	KIJ_genome_13576	Known_MAG	Bacteria	Firmicutes_G	SHA-98	DTUO25	HGM14224	HGM14224	HGM14224 sp900761905
238	KIJ_genome_13589	Known_MAG	Bacteria	Firmicutes_A	Clostridia	Oscillospirales	Acutalibacteraceae	Fimivicinus	Fimivicinus sp900544375
239	KIJ_genome_13594	Known_MAG	Bacteria	Proteobacteria	Alphaproteobacteria	RF32	CAG-239	CAZU01
240	KIJ_genome_13595	Known_MAG	Bacteria	Actinobacteriota	Coriobacteriia	Coriobacteriales	Eggerthellaceae	CAG-1427	CAG-1427 sp900538545
241	KIJ_genome_13597	Known_MAG	Bacteria	Firmicutes_A	Clostridia	Lachnospirales	Lachnospiraceae	Ventrimonas	Ventrimonas sp900555625
242	KIJ_genome_1364	Known_MAG	Bacteria	Firmicutes_A	Clostridia	Oscillospirales	Ruminococcaceae	Negativibacillus	Negativibacillus faecipullorum
243	KIJ_genome_13658	Known_MAG	Bacteria	Proteobacteria	Alphaproteobacteria	RF32	CAG-239	51-20	51-20 sp001917175
244	KIJ_genome_13666	Known_MAG	Bacteria	Actinobacteriota	Actinomycetia	Actinomycetales	Actinomycetaceae	Pauljensenia	Pauljensenia sp000308055
245	KIJ_genome_13704	Known_MAG	Bacteria	Firmicutes	Bacilli	Erysipelotrichales	Coprobacillaceae	Faecalibacillus	Faecalibacillus sp900544435
246	KIJ_genome_13725	Known_MAG	Bacteria	Firmicutes_C	Negativicutes	Veillonellales	Dialisteraceae	Dialister	Dialister sp900541605
247	KIJ_genome_13728	Known_MAG	Bacteria	Firmicutes_B	Peptococcia	Peptococcales	Peptococcaceae	UBA7185
248	KIJ_genome_13786	Known_MAG	Bacteria	Firmicutes_C	Negativicutes	Veillonellales	Veillonellaceae	Veillonella
249	KIJ_genome_13790	Known_MAG	Bacteria	Firmicutes_A	Clostridia	Oscillospirales	Oscillospiraceae	Limivicinus	Limivicinus sp900547315
250	KIJ_genome_13805	Known_MAG	Bacteria	Firmicutes_A	Clostridia	Oscillospirales	Ruminococcaceae	Gemmiger
251	KIJ_genome_13869	Known_MAG	Bacteria	Firmicutes	Bacilli	Erysipelotrichales	Coprobacillaceae	Catenibacterium	Catenibacterium sp000437715
4334	MGYG000003812	Known_MAG	Bacteria	Bacteroidota	Bacteroidia	Bacteroidales	Bacteroidaceae	Prevotella	Prevotella colorans
253	KIJ_genome_1391	Known_MAG	Bacteria	Firmicutes_A	Clostridia	Oscillospirales	Ruminococcaceae	Gemmiger	Gemmiger sp900540595
254	KIJ_genome_13924	Known_MAG	Bacteria	Firmicutes_A	Clostridia	Oscillospirales	Ruminococcaceae	Fournierella	Fournierella sp002159185
255	KIJ_genome_13933	Known_MAG	Bacteria	Campylobacterota	Campylobacteria	Campylobacterales	Helicobacteraceae	Helicobacter_C	Helicobacter_C cinaedi
256	KIJ_genome_13947	Known_MAG	Bacteria	Actinobacteriota	Actinomycetia	Actinomycetales	Bifidobacteriaceae	Bifidobacterium	Bifidobacterium vaginale
257	KIJ_genome_13953	Known_MAG	Bacteria	Firmicutes_A	Clostridia	Lachnospirales	Lachnospiraceae	Merdisoma	Merdisoma faecalis
258	KIJ_genome_13966	Known_MAG	Bacteria	Firmicutes_A	Clostridia	Lachnospirales	Lachnospiraceae	COE1	COE1 sp001916965
259	KIJ_genome_13979	Known_MAG	Bacteria	Firmicutes_A	Clostridia	Oscillospirales	CAG-272	CAG-448	CAG-448 sp003150135
260	KIJ_genome_14018	Known_MAG	Bacteria	Bacteroidota	Bacteroidia	Bacteroidales	Muribaculaceae	Muribaculum
261	KIJ_genome_14039	Known_MAG	Bacteria	Firmicutes	Bacilli	RF39	UBA660
262	KIJ_genome_14043	Known_MAG	Bacteria	Actinobacteriota	Coriobacteriia	Coriobacteriales	Coriobacteriaceae	Collinsella
263	KIJ_genome_1405	Known_MAG	Bacteria	Actinobacteriota	Actinomycetia	Actinomycetales	Bifidobacteriaceae	Alloscardovia	Alloscardovia omnicolens
264	KIJ_genome_14053	Known_MAG	Bacteria	Firmicutes_A	Clostridia	Lachnospirales	Anaerotignaceae	Metalachnospira	Metalachnospira sp900553995
265	KIJ_genome_14055	Known_MAG	Bacteria	Proteobacteria	Gammaproteobacteria	Burkholderiales	Burkholderiaceae	Oxalobacter
266	KIJ_genome_14058	Known_MAG	Bacteria	Firmicutes_A	Clostridia	Clostridiales	Clostridiaceae	Clostridium	Clostridium sp900766315
267	KIJ_genome_14072	Known_MAG	Bacteria	Firmicutes_A	Clostridia	Oscillospirales	Oscillospiraceae	Evtepia	Evtepia sp004554585
268	KIJ_genome_14089	Known_MAG	Bacteria	Firmicutes_A	Clostridia	Oscillospirales	Ruminococcaceae	Ruminococcus_D
269	KIJ_genome_14114	Known_MAG	Bacteria	Firmicutes_A	Clostridia	Oscillospirales	Acutalibacteraceae	UMGS1484	UMGS1484 sp905193225
270	KIJ_genome_14116	Known_MAG	Bacteria	Firmicutes_A	Clostridia	Oscillospirales	Oscillospiraceae	Faecousia	Faecousia sp900549705
271	KIJ_genome_14122	Known_MAG	Bacteria	Firmicutes_A	Clostridia	Christensenellales	Christensenellaceae	QANA01
272	KIJ_genome_14133	Known_MAG	Bacteria	Firmicutes	Bacilli	Erysipelotrichales	Erysipelotrichaceae	NSJ-61	NSJ-61 sp003433845
273	KIJ_genome_14149	Known_MAG	Bacteria	Firmicutes_A	Clostridia	Lachnospirales	Lachnospiraceae	Lachnospira	Lachnospira rogosae_A
274	KIJ_genome_14222	Known_MAG	Bacteria	Firmicutes_A	Clostridia	Oscillospirales	Acutalibacteraceae	Scatavimonas	Scatavimonas merdipullorum
275	KIJ_genome_14231	Known_MAG	Bacteria	Firmicutes_A	Clostridia	Lachnospirales	Lachnospiraceae	Mediterraneibacter	Mediterraneibacter torques
276	KIJ_genome_14236	Known_MAG	Bacteria	Firmicutes_A	Clostridia	Lachnospirales	Anaerotignaceae	Anaerotignum	Anaerotignum faecicola
277	KIJ_genome_14279	Known_MAG	Bacteria	Bacteroidota	Bacteroidia	Bacteroidales	Rikenellaceae	Alistipes_A	Alistipes_A sp900539755
278	KIJ_genome_14281	Known_MAG	Bacteria	Firmicutes_A	Clostridia	Christensenellales	CAG-74	Ventricola
279	KIJ_genome_14419	Known_MAG	Bacteria	Firmicutes	Bacilli	Lactobacillales	Streptococcaceae	Lactococcus	Lactococcus cremoris
280	KIJ_genome_14491	Known_MAG	Bacteria	Firmicutes_C	Negativicutes	Veillonellales	Dialisteraceae	Dialister	Dialister succinatiphilus
281	KIJ_genome_14495	Known_MAG	Bacteria	Firmicutes_A	Clostridia	Christensenellales	CAG-74	SFMI01
282	KIJ_genome_14541	Known_MAG	Bacteria	Firmicutes	Bacilli	Erysipelotrichales	Coprobacillaceae	Faecalibacillus	Faecalibacillus intestinalis
283	KIJ_genome_14543	Known_MAG	Bacteria	Actinobacteriota	Coriobacteriia	Coriobacteriales	Coriobacteriaceae	Collinsella	Collinsella aerofaciens_AA
284	KIJ_genome_14548	Known_MAG	Bacteria	Firmicutes_A	Clostridia	Lachnospirales	Lachnospiraceae	Lachnospira	Lachnospira sp000436475
285	KIJ_genome_14555	Known_MAG	Bacteria	Firmicutes_C	Negativicutes	Veillonellales	Dialisteraceae	Dialister	Dialister invisus
286	KIJ_genome_14558	Known_MAG	Bacteria	Firmicutes_A	Clostridia	Oscillospirales	Acutalibacteraceae	Acutalibacter	Acutalibacter stercorigallinarum
287	KIJ_genome_14559	Known_MAG	Bacteria	Firmicutes_A	Clostridia	Clostridiales	Clostridiaceae	Clostridium	Clostridium sp000753455
288	KIJ_genome_14590	Known_MAG	Bacteria	Proteobacteria	Gammaproteobacteria	Enterobacterales	Enterobacteriaceae	Hafnia	Hafnia proteus
289	KIJ_genome_14624	Known_MAG	Bacteria	Proteobacteria	Gammaproteobacteria	Burkholderiales	Burkholderiaceae	Sutterella	Sutterella sp900762445
290	KIJ_genome_14627	Known_MAG	Bacteria	Bacteroidota	Bacteroidia	Bacteroidales	Rikenellaceae	Tidjanibacter	Tidjanibacter inops_A
291	KIJ_genome_14697	Known_MAG	Bacteria	Proteobacteria	Gammaproteobacteria	Enterobacterales	Enterobacteriaceae	Edwardsiella	Edwardsiella tarda
292	KIJ_genome_14711	Known_MAG	Bacteria	Proteobacteria	Gammaproteobacteria	Burkholderiales	Burkholderiaceae	Parasutterella	Parasutterella sp900552195
293	KIJ_genome_14761	Known_MAG	Bacteria	Firmicutes_A	Clostridia	Oscillospirales	Ruminococcaceae	Faecalibacterium	Faecalibacterium sp900765705
294	KIJ_genome_14771	Known_MAG	Bacteria	Firmicutes_A	Clostridia	Lachnospirales	Lachnospiraceae	Lachnospira	Lachnospira eligens
295	KIJ_genome_14782	Known_MAG	Bacteria	Firmicutes_A	Clostridia	Oscillospirales	Ruminococcaceae	Gemmiger
296	KIJ_genome_14788	Known_MAG	Bacteria	Firmicutes_A	Clostridia	Lachnospirales	Lachnospiraceae	Lachnospira	Lachnospira eligens
297	KIJ_genome_14797	Known_MAG	Bacteria	Firmicutes_A	Clostridia	Oscillospirales	Oscillospiraceae	Dysosmobacter
298	KIJ_genome_14810	Known_MAG	Bacteria	Proteobacteria	Gammaproteobacteria	Burkholderiales	Burkholderiaceae	Sutterella	Sutterella sp905213905
299	KIJ_genome_14811	Known_MAG	Bacteria	Firmicutes_A	Clostridia	Oscillospirales	Acutalibacteraceae	Clostridium_A	Clostridium_A leptum
300	KIJ_genome_1482	Known_MAG	Bacteria	Firmicutes_A	Clostridia	Lachnospirales	Lachnospiraceae	Enterocloster	Enterocloster clostridioformis_A
301	KIJ_genome_14828	Known_MAG	Bacteria	Firmicutes_C	Negativicutes	Veillonellales	Dialisteraceae	Dialister	Dialister sp000434475
302	KIJ_genome_14831	Known_MAG	Bacteria	Bacteroidota	Bacteroidia	Bacteroidales	Muribaculaceae	Sodaliphilus	Sodaliphilus pleomorphus
303	KIJ_genome_14845	Known_MAG	Bacteria	Firmicutes_A	Clostridia	Oscillospirales	Acutalibacteraceae	UBA737
304	KIJ_genome_14847	Known_MAG	Bacteria	Fusobacteriota	Fusobacteriia	Fusobacteriales	Fusobacteriaceae	Fusobacterium_A	Fusobacterium_A varium
305	KIJ_genome_1485	Known_MAG	Bacteria	Firmicutes_A	Clostridia	Oscillospirales	Oscillospiraceae
306	KIJ_genome_14857	Known_MAG	Bacteria	Bacteroidota	Bacteroidia	Bacteroidales	Bacteroidaceae	Phocaeicola	Phocaeicola ilei
307	KIJ_genome_14882	Known_MAG	Bacteria	Firmicutes_A	Clostridia	Lachnospirales	Lachnospiraceae	Mediterraneibacter
308	KIJ_genome_14883	Known_MAG	Bacteria	Firmicutes_A	Clostridia	Lachnospirales	Lachnospiraceae	Clostridium_AP	Clostridium_AP scindens
309	KIJ_genome_14903	Known_MAG	Bacteria	Firmicutes_A	Clostridia	Oscillospirales	CAG-272	UMGS1865	UMGS1865 sp900547725
310	KIJ_genome_14929	Known_MAG	Bacteria	Firmicutes_A	Clostridia	Christensenellales	QAND01	UMGS1975	UMGS1975 sp900546685
311	KIJ_genome_14970	Known_MAG	Bacteria	Firmicutes_A	Clostridia	Lachnospirales	Lachnospiraceae	UBA3402	UBA3402 sp003478355
312	KIJ_genome_15043	Known_MAG	Bacteria	Actinobacteriota	Coriobacteriia	Coriobacteriales	Coriobacteriaceae	Collinsella
313	KIJ_genome_15071	Known_MAG	Bacteria	Bacteroidota	Bacteroidia	Bacteroidales	Muribaculaceae	Paramuribaculum	Paramuribaculum sp009775605
314	KIJ_genome_15163	Known_MAG	Bacteria	Firmicutes_A	Clostridia	TANB77	CAG-508	Scatovivens
315	KIJ_genome_15247	Known_MAG	Bacteria	Bacteroidota	Bacteroidia	Bacteroidales	Bacteroidaceae	UBA4372
316	KIJ_genome_15273	Known_MAG	Bacteria	Firmicutes_A	Clostridia	Lachnospirales	Lachnospiraceae	Dorea_A	Dorea_A longicatena_B
317	KIJ_genome_15296	Known_MAG	Bacteria	Firmicutes_A	Clostridia	Christensenellales	Borkfalkiaceae	UMGS621	UMGS621 sp900543915
318	KIJ_genome_15351	Known_MAG	Bacteria	Actinobacteriota	Coriobacteriia	Coriobacteriales	Coriobacteriaceae	Collinsella
319	KIJ_genome_15385	Known_MAG	Bacteria	Bacteroidota	Bacteroidia	Bacteroidales	Bacteroidaceae	UBA6398	UBA6398 sp900550635
320	KIJ_genome_15399	Known_MAG	Bacteria	Firmicutes_C	Negativicutes	Selenomonadales	Selenomonadaceae	Anaerovibrio	Anaerovibrio sp900548165
321	KIJ_genome_15408	Known_MAG	Bacteria	Firmicutes_A	Clostridia	Lachnospirales	Lachnospiraceae	Anaerobutyricum	Anaerobutyricum hallii
322	KIJ_genome_1545	Known_MAG	Bacteria	Fusobacteriota	Fusobacteriia	Fusobacteriales	Leptotrichiaceae	Sneathia
323	KIJ_genome_15451	Known_MAG	Bacteria	Firmicutes_A	Clostridia	Oscillospirales	Butyricicoccaceae	Pseudobutyricicoccus	Pseudobutyricicoccus lothianensis
324	KIJ_genome_15453	Known_MAG	Bacteria	Firmicutes_A	Clostridia	Lachnospirales	Lachnospiraceae	Merdimonas
325	KIJ_genome_15463	Known_MAG	Bacteria	Firmicutes_A	Clostridia	Oscillospirales	Oscillospiraceae	Lawsonibacter	Lawsonibacter sp900549405
326	KIJ_genome_1548	Known_MAG	Bacteria	Proteobacteria	Gammaproteobacteria	Enterobacterales	Pasteurellaceae	Haemophilus_D	Haemophilus_D sp900755445
327	KIJ_genome_15488	Known_MAG	Bacteria	Actinobacteriota	Actinomycetia	Actinomycetales	Actinomycetaceae	Pauljensenia
328	KIJ_genome_15489	Known_MAG	Bacteria	Firmicutes_C	Negativicutes	Veillonellales	Veillonellaceae	Veillonella	Veillonella parvula_A
329	KIJ_genome_15504	Known_MAG	Bacteria	Firmicutes_A	Clostridia	TANB77	CAG-508	CAG-452	CAG-452 sp000434035
330	KIJ_genome_1556	Known_MAG	Bacteria	Bacteroidota	Bacteroidia	Bacteroidales	Muribaculaceae	Limisoma	Limisoma sp000437795
331	KIJ_genome_1561	Known_MAG	Bacteria	Firmicutes_A	Clostridia	Lachnospirales	Lachnospiraceae	Limivivens	Limivivens sp900066135
332	KIJ_genome_15619	Known_MAG	Bacteria	Firmicutes_C	Negativicutes	Veillonellales	Veillonellaceae	Veillonella	Veillonella sp900550455
773	KIJ_genome_24	Known_MAG	Bacteria	Bacteroidota	Bacteroidia	Bacteroidales	Bacteroidaceae	Prevotella	Prevotella copri
334	KIJ_genome_15684	Known_MAG	Bacteria	Firmicutes_A	Clostridia	Lachnospirales	Lachnospiraceae	CAG-882	CAG-882 sp000435595
335	KIJ_genome_15704	Known_MAG	Bacteria	Firmicutes	Bacilli	Lactobacillales	Lactobacillaceae	Limosilactobacillus	Limosilactobacillus sp012843675
336	KIJ_genome_15710	Known_MAG	Bacteria	Bacteroidota	Bacteroidia	Bacteroidales	Muribaculaceae	Avimuribaculum
337	KIJ_genome_1572	Known_MAG	Bacteria	Bacteroidota	Bacteroidia	Bacteroidales	Bacteroidaceae	Bacteroides	Bacteroides ovatus
338	KIJ_genome_15725	Known_MAG	Bacteria	Firmicutes_A	Clostridia	Christensenellales	CAG-917	Limadaptatus	Limadaptatus stercorigallinarum
339	KIJ_genome_15727	Known_MAG	Bacteria	Proteobacteria	Gammaproteobacteria	Burkholderiales	Burkholderiaceae	Duodenibacillus
340	KIJ_genome_15766	Known_MAG	Bacteria	Firmicutes_A	Clostridia	Oscillospirales	Ruminococcaceae	Ruthenibacterium	Ruthenibacterium lactatiformans
140	KIJ_genome_11150	Known_MAG	Bacteria	Bacteroidota	Bacteroidia	Bacteroidales	Bacteroidaceae	Prevotella	Prevotella copri_A
342	KIJ_genome_15796	Known_MAG	Bacteria	Firmicutes_A	Clostridia	Christensenellales	CAG-74	UBA11524	UBA11524 sp000437595
343	KIJ_genome_15817	Known_MAG	Bacteria	Firmicutes_A	Clostridia	Oscillospirales	Oscillospiraceae	UBA738	UBA738 sp003522945
344	KIJ_genome_15825	Known_MAG	Bacteria	Firmicutes_A	Clostridia	Lachnospirales	Anaerotignaceae	Anaerotignum	Anaerotignum faecicola
345	KIJ_genome_15851	Known_MAG	Bacteria	Bacteroidota	Bacteroidia	Bacteroidales	Rikenellaceae	Tidjanibacter
346	KIJ_genome_15856	Known_MAG	Bacteria	Proteobacteria	Gammaproteobacteria	Burkholderiales	Burkholderiaceae	Sutterella	Sutterella wadsworthensis
347	KIJ_genome_15865	Known_MAG	Bacteria	Firmicutes_A	Clostridia	Peptostreptococcales	Anaerovoracaceae	BX12	BX12 sp014333425
348	KIJ_genome_15883	Known_MAG	Bacteria	Firmicutes_A	Clostridia	Lachnospirales	Anaerotignaceae	Neoanaerotignum_A
349	KIJ_genome_15950	Known_MAG	Bacteria	Firmicutes_A	Clostridia	Lachnospirales	Lachnospiraceae	CAG-95	CAG-95 sp900554925
350	KIJ_genome_15995	Known_MAG	Bacteria	Bacteroidota	Bacteroidia	Bacteroidales	Marinifilaceae	Odoribacter	Odoribacter laneus
351	KIJ_genome_15997	Known_MAG	Bacteria	Desulfobacterota_I	Desulfovibrionia	Desulfovibrionales	Desulfovibrionaceae	Mailhella	Mailhella excrementigallinarum
352	KIJ_genome_16071	Known_MAG	Bacteria	Firmicutes_A	Clostridia	Lachnospirales	Lachnospiraceae	Blautia_A	Blautia_A sp000285855
353	KIJ_genome_16096	Known_MAG	Bacteria	Bacteroidota	Bacteroidia	Bacteroidales	Rikenellaceae	Alistipes_A	Alistipes_A ihumii
354	KIJ_genome_16110	Known_MAG	Bacteria	Firmicutes_A	Clostridia	Oscillospirales	Acutalibacteraceae	UBA737	UBA737 sp900549055
355	KIJ_genome_16131	Known_MAG	Bacteria	Firmicutes	Bacilli	Lactobacillales	Streptococcaceae	Streptococcus	Streptococcus pasteurianus
356	KIJ_genome_16156	Known_MAG	Bacteria	Bacteroidota	Bacteroidia	Bacteroidales	Marinifilaceae	Odoribacter	Odoribacter splanchnicus
357	KIJ_genome_16165	Known_MAG	Bacteria	Firmicutes_C	Negativicutes	Veillonellales	Veillonellaceae	Veillonella	Veillonella parvula_A
358	KIJ_genome_16204	Known_MAG	Bacteria	Firmicutes_A	Clostridia	Lachnospirales	Lachnospiraceae	Roseburia	Roseburia hominis
359	KIJ_genome_16256	Known_MAG	Bacteria	Firmicutes_A	Clostridia	Oscillospirales	Acutalibacteraceae	UBA7067
360	KIJ_genome_16282	Known_MAG	Bacteria	Firmicutes_A	Clostridia	Oscillospirales	Oscillospiraceae	F23-B02	F23-B02 sp001916715
361	KIJ_genome_16283	Known_MAG	Bacteria	Proteobacteria	Alphaproteobacteria	RF32	CAG-239	CAZU01	CAZU01 sp000432275
362	KIJ_genome_16288	Known_MAG	Bacteria	Patescibacteria	Saccharimonadia	Saccharimonadales	Nanosynbacteraceae	Nanosynbacter	Nanosynbacter sp900556885
363	KIJ_genome_16310	Known_MAG	Bacteria	Verrucomicrobiota	Lentisphaeria	Victivallales	Victivallaceae
364	KIJ_genome_16326	Known_MAG	Bacteria	Firmicutes_A	Clostridia	Oscillospirales	Ruminococcaceae	UBA866	UBA866 sp900543295
365	KIJ_genome_16342	Known_MAG	Bacteria	Firmicutes_A	Clostridia	Oscillospirales	Oscillospiraceae	ER4	ER4 sp000765235
366	KIJ_genome_16344	Known_MAG	Bacteria	Firmicutes_A	Clostridia	Lachnospirales	Anaerotignaceae	Neoanaerotignum_A
367	KIJ_genome_16350	Known_MAG	Bacteria	Fusobacteriota	Fusobacteriia	Fusobacteriales	Fusobacteriaceae	Fusobacterium_A	Fusobacterium_A mortiferum
368	KIJ_genome_16351	Known_MAG	Bacteria	Firmicutes_A	Clostridia	Lachnospirales	Lachnospiraceae	Enterocloster	Enterocloster sp900538485
369	KIJ_genome_1637	Known_MAG	Bacteria	Bacteroidota	Bacteroidia	Bacteroidales	Bacteroidaceae	Alloprevotella	Alloprevotella sp900752815
370	KIJ_genome_16392	Known_MAG	Bacteria	Proteobacteria	Gammaproteobacteria	Enterobacterales	Pasteurellaceae	Haemophilus_D
371	KIJ_genome_16469	Known_MAG	Bacteria	Firmicutes_A	Clostridia	Lachnospirales	Lachnospiraceae	Ruminococcus_B	Ruminococcus_B gnavus
372	KIJ_genome_16472	Known_MAG	Bacteria	Firmicutes_A	Clostridia	Oscillospirales	Acutalibacteraceae	Caccousia	Caccousia sp900752115
373	KIJ_genome_1652	Known_MAG	Bacteria	Firmicutes	Bacilli	Lactobacillales	Lactobacillaceae	Limosilactobacillus	Limosilactobacillus fermentum
374	KIJ_genome_16536	Known_MAG	Bacteria	Campylobacterota	Campylobacteria	Campylobacterales	Campylobacteraceae	Campylobacter_A	Campylobacter_A concisus_F
375	KIJ_genome_16551	Known_MAG	Bacteria	Firmicutes_A	Clostridia	Oscillospirales	Oscillospiraceae	Faecousia
376	KIJ_genome_16573	Known_MAG	Bacteria	Desulfobacterota_I	Desulfovibrionia	Desulfovibrionales	Desulfovibrionaceae	Desulfovibrio
377	KIJ_genome_16582	Known_MAG	Bacteria	Firmicutes_A	Clostridia	Oscillospirales	Ruminococcaceae	CAG-115	CAG-115 sp003531585
378	KIJ_genome_16583	Known_MAG	Bacteria	Firmicutes_A	Clostridia	Lachnospirales	Lachnospiraceae	Enterocloster	Enterocloster sp001517625
379	KIJ_genome_16621	Known_MAG	Bacteria	Proteobacteria	Gammaproteobacteria	Burkholderiales	Burkholderiaceae	Duodenibacillus	Duodenibacillus sp900544255
380	KIJ_genome_16622	Known_MAG	Bacteria	Bacteroidota	Bacteroidia	Bacteroidales	Rikenellaceae	Rikenella	Rikenella microfusus
381	KIJ_genome_16694	Known_MAG	Bacteria	Bacteroidota	Bacteroidia	Bacteroidales	Muribaculaceae	CAG-873	CAG-873 sp001701165
382	KIJ_genome_1673	Known_MAG	Bacteria	Actinobacteriota	Coriobacteriia	Coriobacteriales	Eggerthellaceae	Slackia_A	Slackia_A isoflavoniconvertens
383	KIJ_genome_16748	Known_MAG	Bacteria	Firmicutes	Bacilli	Lactobacillales	Lactobacillaceae	Leuconostoc	Leuconostoc inhae
384	KIJ_genome_16762	Known_MAG	Bacteria	Bacteroidota	Bacteroidia	Bacteroidales	Muribaculaceae	CAG-485	CAG-485 sp001701295
385	KIJ_genome_1678	Known_MAG	Bacteria	Bacteroidota	Bacteroidia	Bacteroidales	Porphyromonadaceae	Porphyromonas	Porphyromonas gingivalis
386	KIJ_genome_16780	Known_MAG	Bacteria	Firmicutes_A	Clostridia	Oscillospirales	Butyricicoccaceae	Agathobaculum
387	KIJ_genome_16800	Known_MAG	Bacteria	Bacteroidota	Bacteroidia	Bacteroidales	Bacteroidaceae	Alloprevotella	Alloprevotella sp900540885
388	KIJ_genome_16810	Known_MAG	Bacteria	Proteobacteria	Gammaproteobacteria	Enterobacterales	Pasteurellaceae	Haemophilus_D	Haemophilus_D parainfluenzae
389	KIJ_genome_16829	Known_MAG	Bacteria	Firmicutes_A	Clostridia	Lachnospirales	Anaerotignaceae	Metalachnospira	Metalachnospira sp900546215
390	KIJ_genome_16831	Known_MAG	Bacteria	Proteobacteria	Gammaproteobacteria	Enterobacterales	Enterobacteriaceae	Leclercia	Leclercia adecarboxylata
391	KIJ_genome_16839	Known_MAG	Bacteria	Firmicutes_A	Clostridia	Clostridiales	Clostridiaceae	Clostridium	Clostridium sp900547475
392	KIJ_genome_16842	Known_MAG	Bacteria	Actinobacteriota	Coriobacteriia	Coriobacteriales	Coriobacteriaceae	Collinsella	Collinsella sp003459245
393	KIJ_genome_16862	Known_MAG	Bacteria	Firmicutes_A	Clostridia	Oscillospirales	Ruminococcaceae	Angelakisella	Angelakisella sp004557855
394	KIJ_genome_16887	Known_MAG	Bacteria	Proteobacteria	Gammaproteobacteria	Enterobacterales	Pasteurellaceae	Haemophilus_D	Haemophilus_D parainfluenzae
395	KIJ_genome_16896	Known_MAG	Bacteria	Firmicutes	Bacilli	Erysipelotrichales	Erysipelotrichaceae	Absicoccus	Absicoccus porci
396	KIJ_genome_16905	Known_MAG	Bacteria	Firmicutes_A	Clostridia	Lachnospirales	Lachnospiraceae	Pseudolachnospira
397	KIJ_genome_16964	Known_MAG	Bacteria	Firmicutes_A	Clostridia	Christensenellales	CAG-74	SFMI01	SFMI01 sp004556155
398	KIJ_genome_16967	Known_MAG	Bacteria	Firmicutes_A	Clostridia	Christensenellales	QAND01	Allochristensenella
399	KIJ_genome_16970	Known_MAG	Bacteria	Firmicutes_A	Clostridia	Lachnospirales	Lachnospiraceae	Lachnospira	Lachnospira sp000436475
400	KIJ_genome_16980	Known_MAG	Bacteria	Firmicutes_A	Clostridia	Lachnospirales	Anaerotignaceae	Anaerotignum	Anaerotignum faecicola
401	KIJ_genome_16994	Known_MAG	Bacteria	Firmicutes_A	Clostridia	Christensenellales	CAG-314	CAG-314	CAG-314 sp000437915
402	KIJ_genome_17000	Known_MAG	Bacteria	Spirochaetota	Brachyspirae	Brachyspirales	Brachyspiraceae	Brachyspira	Brachyspira pilosicoli
403	KIJ_genome_17031	Known_MAG	Bacteria	Firmicutes_A	Clostridia	UBA1381	UBA1381	UBA4716	UBA4716 sp900556575
404	KIJ_genome_1704	Known_MAG	Bacteria	Firmicutes	Bacilli	Lactobacillales	Lactobacillaceae	Lacticaseibacillus	Lacticaseibacillus rhamnosus
405	KIJ_genome_17047	Known_MAG	Bacteria	Fusobacteriota	Fusobacteriia	Fusobacteriales	Fusobacteriaceae	Fusobacterium_B	Fusobacterium_B sp900554355
406	KIJ_genome_17053	Known_MAG	Bacteria	Firmicutes_A	Clostridia	Peptostreptococcales	Anaerovoracaceae	QAKD01	QAKD01 sp003343965
407	KIJ_genome_1706	Known_MAG	Bacteria	Firmicutes	Bacilli	RFN20	CAG-826	Enteromonas	Enteromonas sp900550795
408	KIJ_genome_17060	Known_MAG	Bacteria	Actinobacteriota	Coriobacteriia	Coriobacteriales	Coriobacteriaceae	Collinsella	Collinsella sp900541695
409	KIJ_genome_17066	Known_MAG	Bacteria	Actinobacteriota	Actinomycetia	Actinomycetales	Micrococcaceae	Rothia
410	KIJ_genome_17088	Known_MAG	Bacteria	Firmicutes_A	Clostridia	Lachnospirales	Lachnospiraceae	1XD42-69	1XD42-69 sp014287635
411	KIJ_genome_17096	Known_MAG	Bacteria	Firmicutes_A	Clostridia	Lachnospirales	Lachnospiraceae	Clostridium_Q
412	KIJ_genome_17116	Known_MAG	Bacteria	Firmicutes_A	Clostridia	Lachnospirales	Lachnospiraceae	Eubacterium_G	Eubacterium_G ventriosum
413	KIJ_genome_17120	Known_MAG	Bacteria	Firmicutes_C	Negativicutes	Veillonellales	Veillonellaceae	Veillonella	Veillonella parvula_A
414	KIJ_genome_1715	Known_MAG	Bacteria	Firmicutes_A	Clostridia	Oscillospirales	Oscillospiraceae	Dysosmobacter	Dysosmobacter sp900550685
415	KIJ_genome_17150	Known_MAG	Bacteria	Firmicutes_A	Clostridia	Christensenellales	CAG-74	Pullichristensenella
416	KIJ_genome_17155	Known_MAG	Bacteria	Actinobacteriota	Coriobacteriia	Coriobacteriales	Coriobacteriaceae	Collinsella	Collinsella sp003459245
417	KIJ_genome_17174	Known_MAG	Bacteria	Actinobacteriota	Coriobacteriia	Coriobacteriales	Coriobacteriaceae	Collinsella
418	KIJ_genome_17175	Known_MAG	Bacteria	Firmicutes_A	Clostridia	Oscillospirales	Butyricicoccaceae	Butyricicoccus_A
419	KIJ_genome_1718	Known_MAG	Bacteria	Firmicutes_A	Clostridia	Oscillospirales	Oscillospiraceae	Faecousia	Faecousia sp900547405
420	KIJ_genome_17187	Known_MAG	Bacteria	Firmicutes	Bacilli	Erysipelotrichales	Coprobacillaceae	Erysipelatoclostridium	Erysipelatoclostridium ramosum
421	KIJ_genome_17264	Known_MAG	Bacteria	Proteobacteria	Gammaproteobacteria	Burkholderiales	Burkholderiaceae	Duodenibacillus	Duodenibacillus sp900544335
422	KIJ_genome_17286	Known_MAG	Bacteria	Firmicutes_B	Dehalobacteriia	UBA4068	UBA5755
423	KIJ_genome_17289	Known_MAG	Bacteria	Verrucomicrobiota	Verrucomicrobiae	Opitutales	CAG-312	Merdousia	Merdousia sp900545705
424	KIJ_genome_17304	Known_MAG	Bacteria	Verrucomicrobiota	Verrucomicrobiae	Opitutales	CAG-312	Merdousia	Merdousia sp000438015
425	KIJ_genome_1732	Known_MAG	Bacteria	Patescibacteria	Saccharimonadia	Saccharimonadales	Nanosynbacteraceae	Nanosynbacter	Nanosynbacter sp905370345
426	KIJ_genome_17326	Known_MAG	Bacteria	Firmicutes_A	Clostridia	Oscillospirales	Ruminococcaceae	Gemmiger	Gemmiger faecavium
427	KIJ_genome_17341	Known_MAG	Bacteria	Firmicutes	Bacilli	Erysipelotrichales	Coprobacillaceae	Massiliomicrobiota	Massiliomicrobiota sp002160865
428	KIJ_genome_17348	Known_MAG	Bacteria	Firmicutes	Bacilli	RFN20	CAG-449	CAG-449
429	KIJ_genome_17379	Known_MAG	Bacteria	Desulfobacterota_I	Desulfovibrionia	Desulfovibrionales	Desulfovibrionaceae	Bilophila	Bilophila wadsworthia
430	KIJ_genome_17440	Known_MAG	Bacteria	Firmicutes_A	Clostridia	Oscillospirales	CAG-272	UBA11512	UBA11512 sp003522145
431	KIJ_genome_1745	Known_MAG	Bacteria	Bacteroidota	Bacteroidia	Bacteroidales	Muribaculaceae	Limisoma
432	KIJ_genome_17465	Known_MAG	Bacteria	Firmicutes	Bacilli	RF39	UBA660	CAG-710
433	KIJ_genome_17482	Known_MAG	Bacteria	Bacteroidota	Bacteroidia	Bacteroidales	Marinifilaceae	Odoribacter	Odoribacter splanchnicus
434	KIJ_genome_17503	Known_MAG	Bacteria	Firmicutes	Bacilli	Erysipelotrichales	Coprobacillaceae	Catenibacterium	Catenibacterium mitsuokai
435	KIJ_genome_1752	Known_MAG	Bacteria	Proteobacteria	Gammaproteobacteria	Enterobacterales	Pasteurellaceae	Haemophilus_D	Haemophilus_D parainfluenzae
436	KIJ_genome_17568	Known_MAG	Bacteria	Firmicutes_A	Clostridia	Oscillospirales	Acutalibacteraceae	Howiella
437	KIJ_genome_17584	Known_MAG	Bacteria	Actinobacteriota	Actinomycetia	Actinomycetales	Actinomycetaceae	Pauljensenia	Pauljensenia sp000466265
438	KIJ_genome_17617	Known_MAG	Bacteria	Firmicutes_A	Clostridia	Christensenellales	CAG-74	Faecivicinus
439	KIJ_genome_17633	Known_MAG	Bacteria	Firmicutes_B	Peptococcia	Peptococcales	Peptococcaceae	QAKL01
440	KIJ_genome_17646	Known_MAG	Bacteria	Desulfobacterota_I	Desulfovibrionia	Desulfovibrionales	Desulfovibrionaceae	Desulfovibrio	Desulfovibrio sp900319575
441	KIJ_genome_17699	Known_MAG	Bacteria	Firmicutes_A	Clostridia	Lachnospirales	Anaerotignaceae	Fimicola
442	KIJ_genome_17714	Known_MAG	Bacteria	Proteobacteria	Gammaproteobacteria	Burkholderiales	Burkholderiaceae	Sutterella	Sutterella merdavium
443	KIJ_genome_17733	Known_MAG	Bacteria	Firmicutes_C	Negativicutes	Veillonellales	Dialisteraceae	Dialister	Dialister succinatiphilus
1439	KR067G_Post1_refinedBins_bin.6	Malaysia_MAG	Bacteria	Bacteroidota	Bacteroidia	Bacteroidales	Bacteroidaceae	Prevotella	Prevotella copri_A
445	KIJ_genome_17748	Known_MAG	Bacteria	Firmicutes_A	Clostridia	Oscillospirales	Ruminococcaceae	Avimicrobium
446	KIJ_genome_17758	Known_MAG	Bacteria	Firmicutes_A	Clostridia	Lachnospirales	Lachnospiraceae	Mediterraneibacter	Mediterraneibacter vanvlietii
447	KIJ_genome_17773	Known_MAG	Bacteria	Proteobacteria	Alphaproteobacteria	RF32	CAG-239	Scatacola_A	Scatacola_A faecigallinarum
448	KIJ_genome_17799	Known_MAG	Bacteria	Firmicutes_A	Clostridia	Oscillospirales	Acutalibacteraceae	Eubacterium_R
449	KIJ_genome_17823	Known_MAG	Bacteria	Actinobacteriota	Actinomycetia	Actinomycetales	Actinomycetaceae	Pauljensenia
450	KIJ_genome_17824	Known_MAG	Bacteria	Firmicutes_A	Clostridia	Oscillospirales	Ruminococcaceae	Anaerofilum	Anaerofilum excrementigallinarum
451	KIJ_genome_17842	Known_MAG	Bacteria	Firmicutes_A	Clostridia	Oscillospirales	Butyricicoccaceae
452	KIJ_genome_17867	Known_MAG	Bacteria	Firmicutes_A	Clostridia	TANB77	CAG-508	CAG-273	CAG-273 sp000437855
453	KIJ_genome_17870	Known_MAG	Bacteria	Firmicutes	Bacilli	RF39	UBA660	HGM10766	HGM10766 sp900757295
454	KIJ_genome_17884	Known_MAG	Bacteria	Firmicutes_A	Clostridia	TANB77	CAG-508	CAG-269	CAG-269 sp900553985
455	KIJ_genome_17894	Known_MAG	Bacteria	Firmicutes_A	Clostridia	Christensenellales	CAG-74	Ventricola	Ventricola gallistercoris
456	KIJ_genome_17899	Known_MAG	Bacteria	Firmicutes_A	Clostridia	Tissierellales	Peptoniphilaceae	Parvimonas	Parvimonas micra
457	KIJ_genome_17914	Known_MAG	Bacteria	Firmicutes_A	Clostridia	Oscillospirales	Butyricicoccaceae	Agathobaculum	Agathobaculum butyriciproducens
458	KIJ_genome_18023	Known_MAG	Bacteria	Firmicutes_A	Clostridia	Eubacteriales	Anaerofustaceae	Anaerofustis
459	KIJ_genome_18030	Known_MAG	Bacteria	Proteobacteria	Gammaproteobacteria	Enterobacterales	Pasteurellaceae	Haemophilus_D	Haemophilus_D sp900756155
460	KIJ_genome_18032	Known_MAG	Bacteria	Firmicutes	Bacilli	Lactobacillales	Streptococcaceae	Streptococcus	Streptococcus thermophilus
3938	MGYG000003353	Known_MAG	Bacteria	Bacteroidota	Bacteroidia	Bacteroidales	Bacteroidaceae	Prevotella	Prevotella corporis
462	KIJ_genome_18075	Known_MAG	Bacteria	Cyanobacteria	Vampirovibrionia	Gastranaerophilales	Gastranaerophilaceae	CAG-196	CAG-196 sp002102975
463	KIJ_genome_18103	Known_MAG	Bacteria	Bacteroidota	Bacteroidia	Bacteroidales	Bacteroidaceae	UBA4372	UBA4372 sp900543815
464	KIJ_genome_18110	Known_MAG	Bacteria	Verrucomicrobiota	Lentisphaeria	Victivallales	Victivallaceae	Victivallis	Victivallis vadensis
465	KIJ_genome_18112	Known_MAG	Bacteria	Firmicutes_A	Clostridia	Oscillospirales	Oscillospiraceae	CAG-83	CAG-83 sp000431575
466	KIJ_genome_18135	Known_MAG	Bacteria	Proteobacteria	Gammaproteobacteria	Burkholderiales	Burkholderiaceae	Sutterella	Sutterella parvirubra
467	KIJ_genome_18142	Known_MAG	Bacteria	Desulfobacterota_I	Desulfovibrionia	Desulfovibrionales	Desulfovibrionaceae	Desulfovibrio
468	KIJ_genome_18155	Known_MAG	Bacteria	Proteobacteria	Gammaproteobacteria	Burkholderiales	Burkholderiaceae	Aphodousia	Aphodousia sp900553105
469	KIJ_genome_18168	Known_MAG	Bacteria	Firmicutes_A	Clostridia	TANB77	CAG-508	UMGS1781	UMGS1781 sp900553695
470	KIJ_genome_18190	Known_MAG	Bacteria	Firmicutes_C	Negativicutes	Acidaminococcales	Acidaminococcaceae	Acidaminococcus	Acidaminococcus timonensis
471	KIJ_genome_18223	Known_MAG	Bacteria	Firmicutes_A	Clostridia	Lachnospirales	Lachnospiraceae	Ventrimonas	Ventrimonas sp003478505
472	KIJ_genome_18261	Known_MAG	Bacteria	Proteobacteria	Gammaproteobacteria	Burkholderiales	Burkholderiaceae	Duodenibacillus	Duodenibacillus sp900552545
473	KIJ_genome_18264	Known_MAG	Bacteria	Firmicutes_A	Clostridia	Christensenellales	CAG-552	UBA10677	UBA10677 sp900767465
474	KIJ_genome_18274	Known_MAG	Bacteria	Cyanobacteria	Vampirovibrionia	Gastranaerophilales	Gastranaerophilaceae	UBA6984	UBA6984 sp003258725
475	KIJ_genome_18275	Known_MAG	Bacteria	Firmicutes_A	Clostridia	Oscillospirales	Acutalibacteraceae	UMGS1487
476	KIJ_genome_18282	Known_MAG	Bacteria	Firmicutes_A	Clostridia	Peptostreptococcales	Anaerovoracaceae	Mogibacterium	Mogibacterium diversum
477	KIJ_genome_18291	Known_MAG	Bacteria	Bacteroidota	Bacteroidia	Bacteroidales	Bacteroidaceae	Phocaeicola	Phocaeicola vulgatus
478	KIJ_genome_18296	Known_MAG	Bacteria	Firmicutes_A	Clostridia	Peptostreptococcales	Anaerovoracaceae	Copromorpha	Copromorpha excrementavium
479	KIJ_genome_18355	Known_MAG	Bacteria	Actinobacteriota	Actinomycetia	Actinomycetales	Actinomycetaceae	Pauljensenia
480	KIJ_genome_18374	Known_MAG	Bacteria	Proteobacteria	Gammaproteobacteria	Enterobacterales	Succinivibrionaceae	Succinivibrio	Succinivibrio hippei_A
481	KIJ_genome_18382	Known_MAG	Bacteria	Firmicutes_A	Clostridia	Oscillospirales	Oscillospiraceae	Dysosmobacter
482	KIJ_genome_18383	Known_MAG	Bacteria	Actinobacteriota	Actinomycetia	Actinomycetales	Actinomycetaceae	Pauljensenia
483	KIJ_genome_18407	Known_MAG	Bacteria	Firmicutes_A	Clostridia	Oscillospirales	Acutalibacteraceae	CAG-217	CAG-217 sp000436335
484	KIJ_genome_18442	Known_MAG	Bacteria	Bacteroidota	Bacteroidia	Bacteroidales	Muribaculaceae	Muribaculum	Muribaculum gordoncarteri
485	KIJ_genome_18449	Known_MAG	Bacteria	Actinobacteriota	Coriobacteriia	Coriobacteriales	UMGS124	UMGS124
486	KIJ_genome_18479	Known_MAG	Bacteria	Firmicutes_A	Clostridia	Oscillospirales	Ruminococcaceae	Negativibacillus
487	KIJ_genome_18503	Known_MAG	Bacteria	Firmicutes_A	Clostridia	Oscillospirales	Butyricicoccaceae	Agathobaculum	Agathobaculum sp900544475
488	KIJ_genome_18562	Known_MAG	Bacteria	Firmicutes_A	Clostridia	Eubacteriales	Eubacteriaceae	Eubacterium	Eubacterium limosum
489	KIJ_genome_18586	Known_MAG	Bacteria	Firmicutes_A	Clostridia	Oscillospirales	Butyricicoccaceae	Agathobaculum
490	KIJ_genome_1863	Known_MAG	Bacteria	Firmicutes_A	Clostridia	Oscillospirales	Oscillospiraceae	Avoscillospira_A
491	KIJ_genome_1864	Known_MAG	Bacteria	Proteobacteria	Gammaproteobacteria	Enterobacterales	Enterobacteriaceae	Enterobacter	Enterobacter cloacae_M
492	KIJ_genome_18655	Known_MAG	Bacteria	Firmicutes_A	Clostridia	Lachnospirales	Lachnospiraceae	Acetatifactor	Acetatifactor sp900760705
493	KIJ_genome_18661	Known_MAG	Bacteria	Proteobacteria	Gammaproteobacteria	Burkholderiales	Burkholderiaceae	Mesosutterella	Mesosutterella sp902797695
494	KIJ_genome_18698	Known_MAG	Bacteria	Verrucomicrobiota	Lentisphaeria	Victivallales	UBA1829	UBA11452	UBA11452 sp003526375
495	KIJ_genome_18753	Known_MAG	Bacteria	Firmicutes_A	Clostridia	Lachnospirales	Lachnospiraceae	Lachnoclostridium_A	Lachnoclostridium_A sp002160755
496	KIJ_genome_18857	Known_MAG	Bacteria	Firmicutes_A	Clostridia	Oscillospirales	Butyricicoccaceae	Agathobaculum	Agathobaculum butyriciproducens
497	KIJ_genome_18894	Known_MAG	Bacteria	Firmicutes_A	Clostridia	Lachnospirales	Lachnospiraceae	Lachnospira	Lachnospira sp000437735
498	KIJ_genome_1893	Known_MAG	Bacteria	Proteobacteria	Gammaproteobacteria	Burkholderiales	Burkholderiaceae	Duodenibacillus	Duodenibacillus sp900544335
499	KIJ_genome_18956	Known_MAG	Bacteria	Firmicutes_A	Clostridia	Christensenellales	Christensenellaceae	QANA01
500	KIJ_genome_1899	Known_MAG	Bacteria	Firmicutes_A	Clostridia	Oscillospirales	Oscillospiraceae
501	KIJ_genome_19009	Known_MAG	Bacteria	Firmicutes	Bacilli	Erysipelotrichales	Erysipelotrichaceae	NSJ-61	NSJ-61 sp003433845
502	KIJ_genome_19013	Known_MAG	Bacteria	Firmicutes_A	Clostridia	Christensenellales	CAG-74	Avichristensenella	Avichristensenella intestinipullorum
503	KIJ_genome_19028	Known_MAG	Bacteria	Firmicutes_A	Clostridia	Oscillospirales	Acutalibacteraceae	Pseudoruminococcus_A	Pseudoruminococcus_A massiliensis
504	KIJ_genome_19046	Known_MAG	Bacteria	Firmicutes_A	Clostridia	Christensenellales	CAG-917	CAG-917
505	KIJ_genome_1909	Known_MAG	Bacteria	Bacteroidota	Bacteroidia	Bacteroidales	Muribaculaceae	Duncaniella
506	KIJ_genome_19101	Known_MAG	Bacteria	Firmicutes_A	Clostridia	Oscillospirales	Oscillospiraceae	CAG-170	CAG-170 sp900553545
507	KIJ_genome_19120	Known_MAG	Bacteria	Firmicutes_C	Negativicutes	Acidaminococcales	Acidaminococcaceae	Acidaminococcus	Acidaminococcus intestini
508	KIJ_genome_19121	Known_MAG	Bacteria	Proteobacteria	Gammaproteobacteria	Enterobacterales	Pasteurellaceae	Haemophilus_D	Haemophilus_D sp900755445
509	KIJ_genome_19135	Known_MAG	Bacteria	Firmicutes_A	Clostridia	Oscillospirales	Ruminococcaceae	Ruminococcus_D
510	KIJ_genome_19143	Known_MAG	Bacteria	Desulfobacterota_I	Desulfovibrionia	Desulfovibrionales	Desulfovibrionaceae	Bilophila	Bilophila sp900550745
511	KIJ_genome_19146	Known_MAG	Bacteria	Desulfobacterota_I	Desulfovibrionia	Desulfovibrionales	Desulfovibrionaceae	Bilophila	Bilophila wadsworthia
512	KIJ_genome_19158	Known_MAG	Bacteria	Firmicutes_C	Negativicutes	Acidaminococcales	Acidaminococcaceae	Phascolarctobacterium_A	Phascolarctobacterium_A succinatutens
513	KIJ_genome_19170	Known_MAG	Bacteria	Actinobacteriota	Actinomycetia	Actinomycetales	Actinomycetaceae	Pauljensenia	Pauljensenia sp000278725
514	KIJ_genome_19198	Known_MAG	Bacteria	Firmicutes	Bacilli	Lactobacillales	Streptococcaceae	Streptococcus	Streptococcus sp000187445
515	KIJ_genome_19200	Known_MAG	Bacteria	Actinobacteriota	Coriobacteriia	Coriobacteriales	Coriobacteriaceae	Collinsella
516	KIJ_genome_19230	Known_MAG	Bacteria	Proteobacteria	Gammaproteobacteria	UBA9339	UBA9339
517	KIJ_genome_1924	Known_MAG	Bacteria	Firmicutes_A	Clostridia	Lachnospirales	Lachnospiraceae	Limivivens	Limivivens merdigallinarum
518	KIJ_genome_19260	Known_MAG	Bacteria	Firmicutes_A	Clostridia	Oscillospirales	Ruminococcaceae	Ruthenibacterium	Ruthenibacterium lactatiformans
519	KIJ_genome_1933	Known_MAG	Bacteria	Firmicutes_A	Clostridia	Oscillospirales	Ruminococcaceae	Ruminococcus	Ruminococcus sp002438605
520	KIJ_genome_19333	Known_MAG	Bacteria	Campylobacterota	Campylobacteria	Campylobacterales	Campylobacteraceae	Campylobacter_B
3786	MGYG000003152	Known_MAG	Bacteria	Bacteroidota	Bacteroidia	Bacteroidales	Bacteroidaceae	Prevotella	Prevotella denticola
522	KIJ_genome_1937	Known_MAG	Bacteria	Firmicutes_C	Negativicutes	Acidaminococcales	Acidaminococcaceae	CAG-266
523	KIJ_genome_19392	Known_MAG	Bacteria	Firmicutes	Bacilli	RF39	UBA660	Scybalousia	Scybalousia sp900542735
524	KIJ_genome_19396	Known_MAG	Bacteria	Firmicutes_A	Clostridia	Peptostreptococcales	Peptostreptococcaceae	Peptacetobacter	Peptacetobacter sp900539645
525	KIJ_genome_19448	Known_MAG	Bacteria	Actinobacteriota	Coriobacteriia	Coriobacteriales	Atopobiaceae	Thermophilibacter	Thermophilibacter provencensis
526	KIJ_genome_19457	Known_MAG	Bacteria	Firmicutes_A	Clostridia	Lachnospirales	Lachnospiraceae	Roseburia	Roseburia sp900756925
527	KIJ_genome_19464	Known_MAG	Bacteria	Actinobacteriota	Actinomycetia	Actinomycetales	Bifidobacteriaceae	Bifidobacterium	Bifidobacterium animalis
528	KIJ_genome_1948	Known_MAG	Bacteria	Firmicutes_A	Clostridia	Clostridiales	Clostridiaceae	Clostridium	Clostridium neonatale
529	KIJ_genome_19482	Known_MAG	Bacteria	Firmicutes_A	Clostridia	Oscillospirales	Ruminococcaceae	Faecalibacterium	Faecalibacterium sp900765105
530	KIJ_genome_19496	Known_MAG	Bacteria	Firmicutes_A	Clostridia	Oscillospirales	Ruminococcaceae	Ruminococcus	Ruminococcus sp905199285
531	KIJ_genome_19502	Known_MAG	Bacteria	Firmicutes_A	Clostridia	Oscillospirales	Ruminococcaceae	Gemmiger	Gemmiger stercoripullorum
532	KIJ_genome_19510	Known_MAG	Bacteria	Bacteroidota	Bacteroidia	Bacteroidales	Porphyromonadaceae	Porphyromonas	Porphyromonas gingivalis
533	KIJ_genome_19514	Known_MAG	Bacteria	Proteobacteria	Gammaproteobacteria	Burkholderiales	Burkholderiaceae	Duodenibacillus	Duodenibacillus sp900542805
534	KIJ_genome_19524	Known_MAG	Bacteria	Proteobacteria	Gammaproteobacteria	Enterobacterales	Pasteurellaceae	Haemophilus_D	Haemophilus_D parainfluenzae_A
535	KIJ_genome_19535	Known_MAG	Bacteria	Proteobacteria	Gammaproteobacteria	Burkholderiales	Burkholderiaceae	Oxalobacter	Oxalobacter sp900760095
536	KIJ_genome_19628	Known_MAG	Bacteria	Firmicutes_A	Clostridia	Oscillospirales	Acutalibacteraceae	Acutalibacter
537	KIJ_genome_19664	Known_MAG	Bacteria	Proteobacteria	Gammaproteobacteria	Burkholderiales	Burkholderiaceae	Sutterella	Sutterella wadsworthensis_A
538	KIJ_genome_19667	Known_MAG	Bacteria	Firmicutes_A	Clostridia	Oscillospirales	Ruminococcaceae	Ruminococcus	Ruminococcus sp002438605
539	KIJ_genome_19753	Known_MAG	Bacteria	Firmicutes_A	Clostridia	Oscillospirales	CAG-272	Flemingibacterium	Flemingibacterium sp900546315
540	KIJ_genome_19776	Known_MAG	Bacteria	Firmicutes_A	Clostridia	Oscillospirales	Butyricicoccaceae	Agathobaculum	Agathobaculum butyriciproducens
541	KIJ_genome_1979	Known_MAG	Bacteria	Firmicutes_A	Clostridia	Oscillospirales	Acutalibacteraceae	UMGS1484	UMGS1484 sp900552285
542	KIJ_genome_19801	Known_MAG	Bacteria	Firmicutes_A	Clostridia	Oscillospirales	Ruminococcaceae	Angelakisella	Angelakisella massiliensis
543	KIJ_genome_19805	Known_MAG	Bacteria	Actinobacteriota	Coriobacteriia	Coriobacteriales	Eggerthellaceae	CAG-1427	CAG-1427 sp900556585
544	KIJ_genome_19839	Known_MAG	Bacteria	Bacteroidota	Bacteroidia	Bacteroidales	Marinifilaceae	Butyricimonas
545	KIJ_genome_19858	Known_MAG	Bacteria	Bacteroidota	Bacteroidia	Bacteroidales	Tannerellaceae	Parabacteroides	Parabacteroides distasonis
546	KIJ_genome_19860	Known_MAG	Bacteria	Firmicutes_A	Clostridia	Oscillospirales	Butyricicoccaceae	Butyricicoccus	Butyricicoccus sp018383195
547	KIJ_genome_1988	Known_MAG	Bacteria	Firmicutes_A	Clostridia	TANB77	CAG-508	CAG-273
548	KIJ_genome_19933	Known_MAG	Bacteria	Firmicutes_A	Clostridia	Christensenellales	Borkfalkiaceae	Gallimonas	Gallimonas caecicola
549	KIJ_genome_19950	Known_MAG	Bacteria	Firmicutes_A	Clostridia	Oscillospirales	Oscillospiraceae	Intestinimonas
550	KIJ_genome_19959	Known_MAG	Bacteria	Firmicutes_C	Negativicutes	Acidaminococcales	Acidaminococcaceae	CAG-266	CAG-266 sp000436095
551	KIJ_genome_19973	Known_MAG	Bacteria	Cyanobacteria	Vampirovibrionia	Gastranaerophilales	Gastranaerophilaceae	Scatenecus	Scatenecus faecavium
552	KIJ_genome_19976	Known_MAG	Bacteria	Firmicutes_A	Clostridia	Christensenellales	CAG-138	Phil1	Phil1 sp001940855
553	KIJ_genome_19977	Known_MAG	Bacteria	Firmicutes_A	Clostridia	Peptostreptococcales	Anaerovoracaceae	Copromorpha	Copromorpha sp905193765
554	KIJ_genome_20009	Known_MAG	Bacteria	Firmicutes_C	Negativicutes	Selenomonadales	Selenomonadaceae	Anaerovibrio	Anaerovibrio sp900548165
555	KIJ_genome_20021	Known_MAG	Bacteria	Firmicutes_A	Clostridia	Lachnospirales	Lachnospiraceae	Ventrimonas	Ventrimonas merdavium
556	KIJ_genome_20035	Known_MAG	Bacteria	Firmicutes_A	Clostridia	Oscillospirales	Oscillospiraceae	Faecousia
557	KIJ_genome_20050	Known_MAG	Bacteria	Proteobacteria	Gammaproteobacteria	Enterobacterales	Succinivibrionaceae	Succinivibrio	Succinivibrio sp900552905
558	KIJ_genome_20091	Known_MAG	Bacteria	Firmicutes_A	Clostridia	Lachnospirales	Lachnospiraceae	Lachnospira	Lachnospira eligens_A
559	KIJ_genome_20099	Known_MAG	Bacteria	Actinobacteriota	Coriobacteriia	Coriobacteriales	Coriobacteriaceae	Collinsella
560	KIJ_genome_2010	Known_MAG	Bacteria	Firmicutes_A	Clostridia	Christensenellales	Borkfalkiaceae	Coproplasma	Coproplasma excrementipullorum
561	KIJ_genome_20121	Known_MAG	Bacteria	Firmicutes_A	Clostridia	Oscillospirales	Ruminococcaceae	Gemmiger
562	KIJ_genome_20133	Known_MAG	Bacteria	Cyanobacteria	Vampirovibrionia	Gastranaerophilales	Gastranaerophilaceae	Scatenecus	Scatenecus sp900554095
563	KIJ_genome_20148	Known_MAG	Bacteria	Firmicutes_A	Clostridia	Oscillospirales	CAG-272	Flemingibacterium	Flemingibacterium merdigallinarum
564	KIJ_genome_20149	Known_MAG	Bacteria	Firmicutes_C	Negativicutes	Acidaminococcales	Acidaminococcaceae	Acidaminococcus	Acidaminococcus intestini
565	KIJ_genome_20158	Known_MAG	Bacteria	Verrucomicrobiota	Verrucomicrobiae	Verrucomicrobiales	Akkermansiaceae	Akkermansia	Akkermansia muciniphila
566	KIJ_genome_20191	Known_MAG	Bacteria	Firmicutes	Bacilli	Erysipelotrichales	Erysipelotrichaceae	Holdemanella	Holdemanella sp003458715
567	KIJ_genome_20209	Known_MAG	Bacteria	Firmicutes_A	Clostridia	Oscillospirales	Oscillospiraceae	CAG-83	CAG-83 sp900549395
568	KIJ_genome_20210	Known_MAG	Bacteria	Firmicutes_B	Peptococcia	Peptococcales	Peptococcaceae	UMGS1590	UMGS1590 sp900552455
569	KIJ_genome_20217	Known_MAG	Bacteria	Firmicutes_A	Clostridia	Lachnospirales	Anaerotignaceae	Anaerotignum	Anaerotignum lactatifermentans
570	KIJ_genome_20272	Known_MAG	Bacteria	Firmicutes_C	Negativicutes	Veillonellales	Veillonellaceae	Veillonella_A	Veillonella_A sp900765165
571	KIJ_genome_20291	Known_MAG	Bacteria	Bacteroidota	Bacteroidia	Bacteroidales	Marinifilaceae	Odoribacter	Odoribacter splanchnicus
572	KIJ_genome_20311	Known_MAG	Bacteria	Proteobacteria	Gammaproteobacteria	Burkholderiales	Burkholderiaceae	Sutterella	Sutterella megalosphaeroides
573	KIJ_genome_20318	Known_MAG	Bacteria	Firmicutes	Bacilli	RF39	UBA660	Onthousia	Onthousia sp000438295
574	KIJ_genome_20337	Known_MAG	Bacteria	Firmicutes_A	Clostridia	Lachnospirales	Lachnospiraceae	Mediterraneibacter	Mediterraneibacter caccogallinarum
575	KIJ_genome_20341	Known_MAG	Bacteria	Firmicutes_A	Clostridia	UBA1212	UBA1255	Egerieisoma	Egerieisoma sp900552695
576	KIJ_genome_20354	Known_MAG	Bacteria	Firmicutes_A	Clostridia	Lachnospirales	Lachnospiraceae	Blautia_A	Blautia_A faecigallinarum
577	KIJ_genome_20355	Known_MAG	Bacteria	Firmicutes	Bacilli	Erysipelotrichales	Coprobacillaceae	Coprobacillus	Coprobacillus cateniformis
578	KIJ_genome_20359	Known_MAG	Bacteria	Firmicutes_A	Clostridia	Oscillospirales	Acutalibacteraceae	CAG-964	CAG-964 sp000435335
579	KIJ_genome_20365	Known_MAG	Bacteria	Firmicutes_A	Clostridia	Lachnospirales	Lachnospiraceae	Copromonas	Copromonas sp000435795
580	KIJ_genome_20380	Known_MAG	Bacteria	Firmicutes	Bacilli	RF39	UBA660	Onthousia	Onthousia sp000438295
581	KIJ_genome_20384	Known_MAG	Bacteria	Firmicutes_A	Clostridia	Christensenellales	Christensenellaceae	Scybalosoma	Scybalosoma faecavium
582	KIJ_genome_20416	Known_MAG	Bacteria	Proteobacteria	Gammaproteobacteria	Burkholderiales	Burkholderiaceae	Turicimonas
583	KIJ_genome_20417	Known_MAG	Bacteria	Firmicutes_A	Clostridia	Peptostreptococcales	Peptostreptococcaceae	Peptostreptococcus	Peptostreptococcus sp900759325
584	KIJ_genome_20459	Known_MAG	Bacteria	Firmicutes_A	Clostridia	Lachnospirales	Lachnospiraceae	Eubacterium_I	Eubacterium_I sp000270305
585	KIJ_genome_20489	Known_MAG	Bacteria	Firmicutes_A	Clostridia	Oscillospirales	Ruminococcaceae	Negativibacillus	Negativibacillus sp000435195
586	KIJ_genome_20494	Known_MAG	Bacteria	Firmicutes_A	Clostridia	Lachnospirales	Lachnospiraceae	Mediterraneibacter	Mediterraneibacter norwichensis
587	KIJ_genome_205	Known_MAG	Bacteria	Proteobacteria	Gammaproteobacteria	Enterobacterales	Pasteurellaceae	Haemophilus_D	Haemophilus_D sp905205995
588	KIJ_genome_2050	Known_MAG	Bacteria	Firmicutes_A	Clostridia	Peptostreptococcales	Anaerovoracaceae	Eubacterium_B	Eubacterium_B infirmum
589	KIJ_genome_20524	Known_MAG	Bacteria	Firmicutes_A	Clostridia	Christensenellales	CAG-74	UBA11524	UBA11524 sp000437595
590	KIJ_genome_20549	Known_MAG	Bacteria	Proteobacteria	Gammaproteobacteria	Enterobacterales	Enterobacteriaceae	Enterobacter	Enterobacter roggenkampii
591	KIJ_genome_20554	Known_MAG	Bacteria	Firmicutes_A	Clostridia	Oscillospirales	Oscillospiraceae
592	KIJ_genome_20558	Known_MAG	Bacteria	Actinobacteriota	Actinomycetia	Actinomycetales	Micrococcaceae	Rothia	Rothia mucilaginosa_A
593	KIJ_genome_20573	Known_MAG	Bacteria	Firmicutes_A	Clostridia	Lachnospirales	Lachnospiraceae	Copromonas	Copromonas sp900541255
594	KIJ_genome_20577	Known_MAG	Bacteria	Firmicutes	Bacilli	Lactobacillales	Lactobacillaceae	Lactobacillus	Lactobacillus paragasseri
595	KIJ_genome_20590	Known_MAG	Bacteria	Verrucomicrobiota	Lentisphaeria	Victivallales	UBA1829	UBA11452
596	KIJ_genome_20616	Known_MAG	Bacteria	Firmicutes_A	Clostridia	Oscillospirales	CAG-272	UMGS1696	UMGS1696 sp900753285
597	KIJ_genome_2062	Known_MAG	Bacteria	Synergistota	Synergistia	Synergistales	Synergistaceae	Synergistes	Synergistes jonesii
598	KIJ_genome_20640	Known_MAG	Bacteria	Firmicutes	Bacilli	Lactobacillales	Enterococcaceae	Enterococcus_C	Enterococcus_C diestrammenae
599	KIJ_genome_20641	Known_MAG	Bacteria	Bacteroidota	Bacteroidia	Bacteroidales	Muribaculaceae	Sodaliphilus	Sodaliphilus pleomorphus
600	KIJ_genome_20643	Known_MAG	Bacteria	Actinobacteriota	Actinomycetia	Actinomycetales	Micrococcaceae	Rothia	Rothia mucilaginosa_B
601	KIJ_genome_20649	Known_MAG	Bacteria	Firmicutes_A	Clostridia	Lachnospirales	Lachnospiraceae	Enterocloster	Enterocloster bolteae
602	KIJ_genome_2065	Known_MAG	Bacteria	Firmicutes_B	Dehalobacteriia	UBA7702	UBA7702	UBA7702
603	KIJ_genome_20651	Known_MAG	Bacteria	Firmicutes_A	Clostridia	Oscillospirales	Acutalibacteraceae	CAG-177	CAG-177 sp003514385
604	KIJ_genome_20658	Known_MAG	Bacteria	Firmicutes	Bacilli	Erysipelotrichales	Erysipelotrichaceae	Faecalitalea	Faecalitalea cylindroides
605	KIJ_genome_20681	Known_MAG	Bacteria	Bacteroidota	Bacteroidia	Bacteroidales	Muribaculaceae	CAG-485
606	KIJ_genome_20696	Known_MAG	Bacteria	Cyanobacteria	Vampirovibrionia	Gastranaerophilales	Gastranaerophilaceae	Stercorousia	Stercorousia faecigallinarum
607	KIJ_genome_20701	Known_MAG	Bacteria	Firmicutes_A	Clostridia	Lachnospirales	Lachnospiraceae	Agathobacter	Agathobacter rectalis
608	KIJ_genome_2072	Known_MAG	Bacteria	Firmicutes_A	Clostridia	Lachnospirales	Lachnospiraceae	Copromonas	Copromonas avistercoris
609	KIJ_genome_20723	Known_MAG	Bacteria	Firmicutes_A	Clostridia	Lachnospirales	Lachnospiraceae	Eisenbergiella	Eisenbergiella porci
610	KIJ_genome_20741	Known_MAG	Bacteria	Firmicutes_A	Clostridia	Lachnospirales	Lachnospiraceae	Blautia_A	Blautia_A sp900541345
611	KIJ_genome_20742	Known_MAG	Bacteria	Actinobacteriota	Actinomycetia	Actinomycetales	Actinomycetaceae	Pauljensenia	Pauljensenia sp000308055
612	KIJ_genome_20746	Known_MAG	Bacteria	Firmicutes_C	Negativicutes	Veillonellales	Dialisteraceae	Dialister	Dialister sp002320515
613	KIJ_genome_20755	Known_MAG	Bacteria	Firmicutes_A	Clostridia	Christensenellales	CAG-74	Ventricola	Ventricola sp900542445
614	KIJ_genome_20783	Known_MAG	Bacteria	Firmicutes	Bacilli	Lactobacillales	Lactobacillaceae	Limosilactobacillus	Limosilactobacillus fermentum
615	KIJ_genome_20789	Known_MAG	Bacteria	Desulfobacterota_I	Desulfovibrionia	Desulfovibrionales	Desulfovibrionaceae	Desulfovibrio	Desulfovibrio sp900319575
616	KIJ_genome_20800	Known_MAG	Bacteria	Actinobacteriota	Coriobacteriia	Coriobacteriales	Coriobacteriaceae	Collinsella
617	KIJ_genome_20836	Known_MAG	Bacteria	Firmicutes_A	Clostridia	Oscillospirales	Ruminococcaceae	Ruminiclostridium_E	Ruminiclostridium_E siraeum
618	KIJ_genome_20852	Known_MAG	Bacteria	Bacteroidota	Bacteroidia	Bacteroidales	Tannerellaceae	Parabacteroides	Parabacteroides merdae
619	KIJ_genome_20864	Known_MAG	Bacteria	Bacteroidota	Bacteroidia	Bacteroidales	Rikenellaceae	Alistipes
620	KIJ_genome_20910	Known_MAG	Bacteria	Bacteroidota	Bacteroidia	Bacteroidales	UBA932	Cryptobacteroides	Cryptobacteroides sp900545245
621	KIJ_genome_20956	Known_MAG	Bacteria	Desulfobacterota_I	Desulfovibrionia	Desulfovibrionales	Desulfovibrionaceae	Mailhella	Mailhella massiliensis
622	KIJ_genome_20975	Known_MAG	Bacteria	Proteobacteria	Gammaproteobacteria	Enterobacterales	Succinivibrionaceae	Succinivibrio
623	KIJ_genome_20986	Known_MAG	Bacteria	Firmicutes_A	Clostridia	Oscillospirales	Ruminococcaceae	UBA3818	UBA3818 sp904397845
624	KIJ_genome_20993	Known_MAG	Bacteria	Firmicutes_A	Clostridia	Christensenellales	CAG-138	UBA1685	UBA1685 sp002320595
625	KIJ_genome_21106	Known_MAG	Bacteria	Firmicutes_A	Clostridia	Oscillospirales	Acutalibacteraceae	CAG-217	CAG-217 sp000436335
626	KIJ_genome_21107	Known_MAG	Bacteria	Firmicutes_A	Clostridia	Lachnospirales	Lachnospiraceae	CAG-632	CAG-632 sp000431515
627	KIJ_genome_21111	Known_MAG	Bacteria	Firmicutes	Bacilli	Erysipelotrichales	Coprobacillaceae	Catenibacterium	Catenibacterium mitsuokai
628	KIJ_genome_21130	Known_MAG	Bacteria	Firmicutes	Bacilli	Erysipelotrichales	Coprobacillaceae	Faecalibacillus	Faecalibacillus intestinalis
629	KIJ_genome_21136	Known_MAG	Bacteria	Firmicutes	Bacilli	RF39	UBA660	Onthocola_B
630	KIJ_genome_21155	Known_MAG	Bacteria	Firmicutes_A	Clostridia	Lachnospirales	UBA1390	NSJ-32	NSJ-32 sp014384895
631	KIJ_genome_21166	Known_MAG	Bacteria	Fusobacteriota	Fusobacteriia	Fusobacteriales	Fusobacteriaceae	Fusobacterium_C	Fusobacterium_C necrophorum
632	KIJ_genome_2117	Known_MAG	Bacteria	Firmicutes_A	Clostridia	Christensenellales	HGM11417	CAJMQN01
633	KIJ_genome_21192	Known_MAG	Bacteria	Bacteroidota	Bacteroidia	Bacteroidales	Bacteroidaceae	Bacteroides	Bacteroides ndongoniae
634	KIJ_genome_21229	Known_MAG	Bacteria	Firmicutes_A	Clostridia	Christensenellales	UBA1750
635	KIJ_genome_21254	Known_MAG	Bacteria	Actinobacteriota	Coriobacteriia	Coriobacteriales	Atopobiaceae	NM07-P-09
636	KIJ_genome_21258	Known_MAG	Bacteria	Actinobacteriota	Coriobacteriia	Coriobacteriales	Coriobacteriaceae	Collinsella
637	KIJ_genome_2126	Known_MAG	Bacteria	Firmicutes_A	Clostridia	Lachnospirales	Lachnospiraceae	Lachnoclostridium_B	Lachnoclostridium_B stercoravium
638	KIJ_genome_21266	Known_MAG	Bacteria	Firmicutes	Bacilli	RF39	UBA660	HGM10818	HGM10818 sp905211265
639	KIJ_genome_21282	Known_MAG	Bacteria	Desulfobacterota_I	Desulfovibrionia	Desulfovibrionales	Desulfovibrionaceae	Bilophila	Bilophila wadsworthia
640	KIJ_genome_21334	Known_MAG	Bacteria	Firmicutes_A	Clostridia	Monoglobales	Monoglobaceae	UMGS1820	UMGS1820 sp905201285
641	KIJ_genome_21398	Known_MAG	Bacteria	Fusobacteriota	Fusobacteriia	Fusobacteriales	Fusobacteriaceae	Fusobacterium_C	Fusobacterium_C necrophorum
642	KIJ_genome_21401	Known_MAG	Bacteria	Firmicutes_A	Clostridia	Lachnospirales	Lachnospiraceae	Acetatifactor	Acetatifactor sp900755865
643	KIJ_genome_21412	Known_MAG	Bacteria	Firmicutes_A	Clostridia	Monoglobales	Monoglobaceae	UMGS1326	UMGS1326 sp905205855
644	KIJ_genome_21435	Known_MAG	Bacteria	Firmicutes	Bacilli	Lactobacillales	Streptococcaceae	Streptococcus	Streptococcus salivarius
645	KIJ_genome_2146	Known_MAG	Bacteria	Firmicutes_C	Negativicutes	Selenomonadales	Selenomonadaceae	Selenomonas_C	Selenomonas_C sp002351185
646	KIJ_genome_21460	Known_MAG	Bacteria	Campylobacterota	Campylobacteria	Campylobacterales	Campylobacteraceae	Campylobacter_B
667	KIJ_genome_2200	Known_MAG	Bacteria	Bacteroidota	Bacteroidia	Bacteroidales	Bacteroidaceae	Prevotella	Prevotella disiens
648	KIJ_genome_21473	Known_MAG	Bacteria	Firmicutes_A	Clostridia	Oscillospirales	Ruminococcaceae	Ruminococcus_C	Ruminococcus_C callidus
649	KIJ_genome_21520	Known_MAG	Bacteria	Actinobacteriota	Actinomycetia	Actinomycetales	Bifidobacteriaceae	Bifidobacterium	Bifidobacterium adolescentis
650	KIJ_genome_21548	Known_MAG	Bacteria	Firmicutes_A	Clostridia	Oscillospirales	Acutalibacteraceae	Eubacterium_R	Eubacterium_R sp900539425
651	KIJ_genome_21563	Known_MAG	Bacteria	Firmicutes	Bacilli	RF39	UBA660	CAG-302	CAG-302 sp000431795
652	KIJ_genome_21576	Known_MAG	Bacteria	Firmicutes_A	Clostridia	Oscillospirales	CAG-272	HGM12669
653	KIJ_genome_21592	Known_MAG	Bacteria	Firmicutes_A	Clostridia	Oscillospirales	Oscillospiraceae	Lawsonibacter	Lawsonibacter sp900545895
654	KIJ_genome_21595	Known_MAG	Bacteria	Bacteroidota	Bacteroidia	Bacteroidales	Muribaculaceae	Sodaliphilus
655	KIJ_genome_21672	Known_MAG	Bacteria	Firmicutes_A	Clostridia	Lachnospirales	Lachnospiraceae	Eubacterium_G	Eubacterium_G sp904420085
656	KIJ_genome_21675	Known_MAG	Bacteria	Desulfobacterota_I	Desulfovibrionia	Desulfovibrionales	Desulfovibrionaceae	Bilophila	Bilophila wadsworthia
657	KIJ_genome_21705	Known_MAG	Bacteria	Proteobacteria	Gammaproteobacteria	Burkholderiales	Burkholderiaceae	Duodenibacillus	Duodenibacillus intestinavium
658	KIJ_genome_21752	Known_MAG	Bacteria	Firmicutes_A	Clostridia	Oscillospirales	Acutalibacteraceae	Limousia
659	KIJ_genome_21759	Known_MAG	Bacteria	Firmicutes_A	Clostridia	Oscillospirales	Acutalibacteraceae	Heritagella	Heritagella gallinarum
660	KIJ_genome_21766	Known_MAG	Bacteria	Firmicutes_A	Clostridia	Clostridiales	Clostridiaceae	Clostridium	Clostridium sp900539375
661	KIJ_genome_21790	Known_MAG	Bacteria	Firmicutes_A	Clostridia	Oscillospirales	Acutalibacteraceae	Acutalibacter	Acutalibacter stercoravium
662	KIJ_genome_21923	Known_MAG	Bacteria	Proteobacteria	Gammaproteobacteria	Enterobacterales	Enterobacteriaceae	Klebsiella	Klebsiella grimontii
663	KIJ_genome_21947	Known_MAG	Bacteria	Firmicutes_A	Clostridia	Oscillospirales	Acutalibacteraceae	Eubacterium_R	Eubacterium_R sp000433975
664	KIJ_genome_21955	Known_MAG	Bacteria	Firmicutes_A	Clostridia	Lachnospirales	Lachnospiraceae	Agathobacter	Agathobacter rectalis
665	KIJ_genome_21965	Known_MAG	Bacteria	Firmicutes_A	Clostridia	Christensenellales	UBA1750	Spyradocola	Spyradocola merdavium
666	KIJ_genome_21984	Known_MAG	Bacteria	Firmicutes_C	Negativicutes	Selenomonadales	Selenomonadaceae	Mitsuokella	Mitsuokella jalaludinii
1736	MGYG000000272	Known_MAG	Bacteria	Bacteroidota	Bacteroidia	Bacteroidales	Bacteroidaceae	Prevotella	Prevotella hominis
668	KIJ_genome_22003	Known_MAG	Bacteria	Firmicutes	Bacilli	Erysipelotrichales	Erysipelotrichaceae	Holdemania	Holdemania filiformis
669	KIJ_genome_22048	Known_MAG	Bacteria	Cyanobacteria	Vampirovibrionia	Gastranaerophilales	Gastranaerophilaceae	Limenecus	Limenecus avicola
670	KIJ_genome_2206	Known_MAG	Bacteria	Proteobacteria	Gammaproteobacteria	Enterobacterales	Enterobacteriaceae	Citrobacter	Citrobacter freundii
671	KIJ_genome_22061	Known_MAG	Bacteria	Bacteroidota	Bacteroidia	Bacteroidales	UBA932	Cryptobacteroides	Cryptobacteroides sp000433355
672	KIJ_genome_22088	Known_MAG	Bacteria	Synergistota	Synergistia	Synergistales	Dethiosulfovibrionaceae	Pyramidobacter	Pyramidobacter piscolens
673	KIJ_genome_22098	Known_MAG	Bacteria	Firmicutes_A	Clostridia	TANB77	CAG-508	Merdicola	Merdicola sp001915925
1000	KIJ_genome_28524	Known_MAG	Bacteria	Bacteroidota	Bacteroidia	Bacteroidales	Bacteroidaceae	Prevotella	Prevotella intermedia
675	KIJ_genome_22148	Known_MAG	Bacteria	Firmicutes_A	Clostridia	UBA1381	UBA1381
676	KIJ_genome_22157	Known_MAG	Bacteria	Firmicutes	Bacilli	RFN20	CAG-826	CAJOOD01
677	KIJ_genome_22185	Known_MAG	Bacteria	Actinobacteriota	Coriobacteriia	Coriobacteriales	Atopobiaceae	Paratractidigestivibacter	Paratractidigestivibacter faecalis
678	KIJ_genome_22223	Known_MAG	Bacteria	Cyanobacteria	Vampirovibrionia	Gastranaerophilales	Gastranaerophilaceae	UMGS1585
679	KIJ_genome_22224	Known_MAG	Bacteria	Firmicutes_A	Clostridia	Oscillospirales	Acutalibacteraceae	Timburyella	Timburyella sp900554165
680	KIJ_genome_22231	Known_MAG	Bacteria	Firmicutes_A	Clostridia	Lachnospirales	Lachnospiraceae	CAG-95	CAG-95 sp900066375
681	KIJ_genome_22267	Known_MAG	Bacteria	Firmicutes_A	Clostridia	Oscillospirales	Ruminococcaceae	Faecalibacterium	Faecalibacterium sp900540455
682	KIJ_genome_22275	Known_MAG	Bacteria	Firmicutes_A	Clostridia	Oscillospirales	Oscillospiraceae	Flavonifractor	Flavonifractor plautii
683	KIJ_genome_2236	Known_MAG	Bacteria	Firmicutes_A	Clostridia	Peptostreptococcales	Anaerovoracaceae	Mogibacterium	Mogibacterium timidum
684	KIJ_genome_22372	Known_MAG	Bacteria	Firmicutes_C	Negativicutes	Acidaminococcales	Acidaminococcaceae	Acidaminococcus	Acidaminococcus intestini
685	KIJ_genome_22389	Known_MAG	Bacteria	Firmicutes	Bacilli	Erysipelotrichales	Erysipelotrichaceae	Merdibacter	Merdibacter merdigallinarum
686	KIJ_genome_22404	Known_MAG	Bacteria	Actinobacteriota	Coriobacteriia	Coriobacteriales	Coriobacteriaceae	Coprousia	Coprousia sp002159335
687	KIJ_genome_22413	Known_MAG	Bacteria	Firmicutes_A	Clostridia	Oscillospirales	Ruminococcaceae	Gemmiger	Gemmiger qucibialis
688	KIJ_genome_22467	Known_MAG	Bacteria	Bacteroidota	Bacteroidia	Bacteroidales	Marinifilaceae	Butyricimonas	Butyricimonas virosa
689	KIJ_genome_22483	Known_MAG	Bacteria	Firmicutes_A	Clostridia	Oscillospirales	Butyricicoccaceae	Agathobaculum	Agathobaculum butyriciproducens
690	KIJ_genome_22489	Known_MAG	Bacteria	Firmicutes_A	Clostridia	Oscillospirales	Butyricicoccaceae	Butyricicoccus	Butyricicoccus sp900547195
691	KIJ_genome_22496	Known_MAG	Bacteria	Firmicutes_A	Clostridia	Oscillospirales	Acutalibacteraceae	Scatavimonas	Scatavimonas sp900540275
692	KIJ_genome_22516	Known_MAG	Bacteria	Desulfobacterota_I	Desulfovibrionia	Desulfovibrionales	Desulfovibrionaceae	Bilophila	Bilophila wadsworthia
693	KIJ_genome_22526	Known_MAG	Bacteria	Proteobacteria	Gammaproteobacteria	Enterobacterales	Enterobacteriaceae	Klebsiella	Klebsiella aerogenes
694	KIJ_genome_22543	Known_MAG	Bacteria	Firmicutes_A	Clostridia	Oscillospirales	Ruminococcaceae	Fimivivens	Fimivivens sp014385025
695	KIJ_genome_22545	Known_MAG	Bacteria	Firmicutes_A	Clostridia	Peptostreptococcales	Anaerovoracaceae	Copromorpha
696	KIJ_genome_22553	Known_MAG	Bacteria	Firmicutes_A	Clostridia	TANB77	CAG-508	CAG-269
697	KIJ_genome_22559	Known_MAG	Bacteria	Proteobacteria	Gammaproteobacteria	Burkholderiales	Burkholderiaceae	Aphodousia	Aphodousia faecalis
698	KIJ_genome_22565	Known_MAG	Bacteria	Firmicutes_A	Clostridia	Lachnospirales	CAG-274	Gallispira	Gallispira sp900551755
699	KIJ_genome_22592	Known_MAG	Bacteria	Firmicutes_A	Clostridia	Oscillospirales	Butyricicoccaceae	Agathobaculum	Agathobaculum butyriciproducens
700	KIJ_genome_22618	Known_MAG	Bacteria	Bacteroidota	Bacteroidia	Flavobacteriales	UBA1820	Merdimorpha	Merdimorpha sp003150615
701	KIJ_genome_22648	Known_MAG	Bacteria	Firmicutes_A	Clostridia	Oscillospirales	Oscillospiraceae	CAG-83	CAG-83 sp900545585
702	KIJ_genome_22652	Known_MAG	Bacteria	Firmicutes_A	Clostridia	Oscillospirales	Acutalibacteraceae	Ruminococcus_E	Ruminococcus_E sp003526955
703	KIJ_genome_22670	Known_MAG	Bacteria	Actinobacteriota	Actinomycetia	Actinomycetales	Micrococcaceae	Rothia	Rothia dentocariosa
704	KIJ_genome_22677	Known_MAG	Bacteria	Firmicutes_A	Clostridia	Oscillospirales	Acutalibacteraceae	UBA737	UBA737 sp002431945
705	KIJ_genome_22729	Known_MAG	Bacteria	Firmicutes	Bacilli	Erysipelotrichales	Erysipelotrichaceae	Bulleidia
706	KIJ_genome_22771	Known_MAG	Bacteria	Firmicutes_A	Clostridia	Oscillospirales	Ruminococcaceae	Faecalibacterium	Faecalibacterium prausnitzii_G
707	KIJ_genome_22774	Known_MAG	Bacteria	Firmicutes_A	Clostridia	Oscillospirales	Oscillospiraceae	UMGS1766
708	KIJ_genome_22792	Known_MAG	Bacteria	Firmicutes_A	Clostridia	Oscillospirales	Ruminococcaceae	Faecalibacterium	Faecalibacterium prausnitzii_E
709	KIJ_genome_22799	Known_MAG	Bacteria	Bacteroidota	Bacteroidia	Flavobacteriales	UBA1820	Merdimorpha
710	KIJ_genome_22832	Known_MAG	Bacteria	Firmicutes_A	Clostridia	Oscillospirales	Acutalibacteraceae	UMGS1071	UMGS1071 sp900541905
711	KIJ_genome_22850	Known_MAG	Bacteria	Firmicutes_C	Negativicutes	Veillonellales	Dialisteraceae	Dialister	Dialister sp000434475
712	KIJ_genome_22881	Known_MAG	Bacteria	Actinobacteriota	Coriobacteriia	Coriobacteriales	RUG844	RUG844	RUG844 sp900313875
713	KIJ_genome_22882	Known_MAG	Bacteria	Proteobacteria	Gammaproteobacteria	Enterobacterales	Enterobacteriaceae	Escherichia	Escherichia coli
714	KIJ_genome_22898	Known_MAG	Bacteria	Firmicutes_A	Clostridia	Lachnospirales	Lachnospiraceae	Mediterraneibacter	Mediterraneibacter torques
715	KIJ_genome_22925	Known_MAG	Bacteria	Firmicutes_A	Clostridia	Lachnospirales	Lachnospiraceae	Blautia_A	Blautia_A excrementigallinarum
716	KIJ_genome_22993	Known_MAG	Bacteria	Firmicutes_A	Clostridia	Lachnospirales	Anaerotignaceae	Metalachnospira	Metalachnospira gallinarum
717	KIJ_genome_22994	Known_MAG	Bacteria	Firmicutes_A	Clostridia	Tissierellales	Peptoniphilaceae	Anaerococcus
718	KIJ_genome_23015	Known_MAG	Bacteria	Actinobacteriota	Coriobacteriia	Coriobacteriales	Atopobiaceae	Parolsenella	Parolsenella catena
719	KIJ_genome_23030	Known_MAG	Bacteria	Bacteroidota	Bacteroidia	Bacteroidales	Bacteroidaceae	Phocaeicola	Phocaeicola sp900541515
720	KIJ_genome_23038	Known_MAG	Bacteria	Actinobacteriota	Coriobacteriia	Coriobacteriales	Eggerthellaceae	CAG-1427	CAG-1427 sp900538545
721	KIJ_genome_23039	Known_MAG	Bacteria	Firmicutes_A	Clostridia	Peptostreptococcales	Anaerovoracaceae	Mogibacterium	Mogibacterium diversum
722	KIJ_genome_23088	Known_MAG	Bacteria	Firmicutes_A	Clostridia	Oscillospirales	Oscillospiraceae	Faecousia	Faecousia sp000435995
723	KIJ_genome_23090	Known_MAG	Bacteria	Proteobacteria	Gammaproteobacteria	Burkholderiales	Burkholderiaceae	Duodenibacillus	Duodenibacillus intestinigallinarum
724	KIJ_genome_23092	Known_MAG	Bacteria	Firmicutes_A	Clostridia	Oscillospirales	Oscillospiraceae	Faecousia	Faecousia sp003525905
725	KIJ_genome_23129	Known_MAG	Bacteria	Firmicutes_A	Clostridia	Oscillospirales	Oscillospiraceae	Limivicinus	Limivicinus sp002320035
726	KIJ_genome_23163	Known_MAG	Bacteria	Firmicutes_A	Clostridia	Lachnospirales	Anaerotignaceae	Anaerotignum	Anaerotignum merdipullorum
727	KIJ_genome_23194	Known_MAG	Bacteria	Actinobacteriota	Coriobacteriia	Coriobacteriales	Coriobacteriaceae	Collinsella
728	KIJ_genome_23197	Known_MAG	Bacteria	Firmicutes	Bacilli	Erysipelotrichales	Erysipelotrichaceae	UBA636
729	KIJ_genome_23210	Known_MAG	Bacteria	Firmicutes_C	Negativicutes	Veillonellales	Dialisteraceae	Dialister	Dialister succinatiphilus
730	KIJ_genome_23213	Known_MAG	Bacteria	Firmicutes_A	Clostridia	Oscillospirales	Ruminococcaceae	Gemmiger	Gemmiger formicilis
731	KIJ_genome_23225	Known_MAG	Bacteria	Firmicutes_A	Clostridia	Oscillospirales	Acutalibacteraceae	Ruminococcus_E
732	KIJ_genome_23248	Known_MAG	Bacteria	Firmicutes_A	Clostridia	Christensenellales	UBA1750	Spyradocola	Spyradocola sp905193155
733	KIJ_genome_23267	Known_MAG	Bacteria	Firmicutes_A	Clostridia	Oscillospirales	Acutalibacteraceae	UMGS1591	UMGS1591 sp900553255
734	KIJ_genome_23304	Known_MAG	Bacteria	Firmicutes_A	Clostridia	Oscillospirales	Ruminococcaceae	Faecalibacterium
735	KIJ_genome_23308	Known_MAG	Bacteria	Actinobacteriota	Coriobacteriia	Coriobacteriales	Coriobacteriaceae	Collinsella
736	KIJ_genome_23311	Known_MAG	Bacteria	Firmicutes_A	Clostridia	Oscillospirales	Oscillospiraceae	Oscillibacter
737	KIJ_genome_2337	Known_MAG	Bacteria	Firmicutes_A	Clostridia	Oscillospirales	Ruminococcaceae	UBA1394	UBA1394 sp900066845
738	KIJ_genome_23375	Known_MAG	Bacteria	Firmicutes_A	Clostridia	Lachnospirales	Lachnospiraceae	Blautia	Blautia sp900541955
739	KIJ_genome_23383	Known_MAG	Bacteria	Firmicutes_A	Clostridia	Oscillospirales	Oscillospiraceae	Onthomonas	Onthomonas sp900752305
740	KIJ_genome_23391	Known_MAG	Bacteria	Firmicutes_A	Clostridia	Lachnospirales	Lachnospiraceae	Copromonas	Copromonas sp900066535
741	KIJ_genome_23411	Known_MAG	Bacteria	Firmicutes_A	Clostridia	Oscillospirales	Ruminococcaceae	Phocea	Phocea massiliensis
742	KIJ_genome_23416	Known_MAG	Bacteria	Firmicutes_A	Clostridia	Lachnospirales	Lachnospiraceae	Enterocloster	Enterocloster asparagiformis
743	KIJ_genome_23458	Known_MAG	Bacteria	Firmicutes_A	Clostridia	Lachnospirales	Lachnospiraceae	Enterocloster	Enterocloster aldenensis
744	KIJ_genome_2346	Known_MAG	Bacteria	Firmicutes	Bacilli	RF39	UBA660	CAG-417	CAG-417 sp000432835
745	KIJ_genome_23469	Known_MAG	Bacteria	Firmicutes	Bacilli	RF39	UBA660	CAG-628	CAG-628 sp000438415
746	KIJ_genome_23470	Known_MAG	Bacteria	Firmicutes_A	Clostridia	Christensenellales	UMGS416	Parachristensenella	Parachristensenella sp900542005
747	KIJ_genome_23477	Known_MAG	Bacteria	Desulfobacterota_I	Desulfovibrionia	Desulfovibrionales	Desulfovibrionaceae	Desulfovibrio	Desulfovibrio desulfuricans_A
748	KIJ_genome_2351	Known_MAG	Bacteria	Firmicutes	Bacilli	Erysipelotrichales	Coprobacillaceae	Erysipelatoclostridium	Erysipelatoclostridium ramosum
749	KIJ_genome_23525	Known_MAG	Bacteria	Campylobacterota	Campylobacteria	Campylobacterales	Campylobacteraceae	Campylobacter_A	Campylobacter_A concisus_C
750	KIJ_genome_23551	Known_MAG	Bacteria	Firmicutes_A	Clostridia	Oscillospirales	Acutalibacteraceae
751	KIJ_genome_23598	Known_MAG	Bacteria	Bacteroidota	Bacteroidia	Bacteroidales	Muribaculaceae	CAG-1031	CAG-1031 sp900752535
752	KIJ_genome_23631	Known_MAG	Bacteria	Firmicutes_A	Clostridia	Christensenellales	QAND01	UMGS1975	UMGS1975 sp900546685
753	KIJ_genome_23640	Known_MAG	Bacteria	Firmicutes_C	Negativicutes	Acidaminococcales	Acidaminococcaceae	Phascolarctobacterium	Phascolarctobacterium faecium
754	KIJ_genome_23670	Known_MAG	Bacteria	Fusobacteriota	Fusobacteriia	Fusobacteriales	Fusobacteriaceae	Fusobacterium_B
755	KIJ_genome_23681	Known_MAG	Bacteria	Firmicutes_A	Clostridia	Oscillospirales	Acutalibacteraceae	UMGS1484	UMGS1484 sp900552285
756	KIJ_genome_23688	Known_MAG	Bacteria	Bacteroidota	Bacteroidia	Bacteroidales	Muribaculaceae	Paramuribaculum	Paramuribaculum sp900759915
757	KIJ_genome_23736	Known_MAG	Bacteria	Firmicutes_A	Clostridia	Clostridiales	Clostridiaceae	Clostridium	Clostridium sp000435835
758	KIJ_genome_23771	Known_MAG	Bacteria	Firmicutes_A	Clostridia	Lachnospirales	Lachnospiraceae	AM51-8	AM51-8 sp003478275
759	KIJ_genome_23828	Known_MAG	Bacteria	Firmicutes_A	Clostridia	Peptostreptococcales	Anaerovoracaceae	Fimisoma
760	KIJ_genome_23830	Known_MAG	Bacteria	Firmicutes	Bacilli	RF39	UBA660	CAG-914	CAG-914 sp000437895
761	KIJ_genome_23831	Known_MAG	Bacteria	Firmicutes	Bacilli	Erysipelotrichales	Coprobacillaceae	Erysipelatoclostridium	Erysipelatoclostridium sp000508865
762	KIJ_genome_23852	Known_MAG	Bacteria	Firmicutes	Bacilli	RF39	UBA660	CAG-1000	CAG-1000 sp000434555
763	KIJ_genome_23862	Known_MAG	Bacteria	Proteobacteria	Gammaproteobacteria	Burkholderiales	Burkholderiaceae	Sutterella	Sutterella seckii_A
764	KIJ_genome_23875	Known_MAG	Bacteria	Firmicutes_A	Clostridia	Oscillospirales	Acutalibacteraceae	UMGS1071
765	KIJ_genome_23881	Known_MAG	Bacteria	Bacteroidota	Bacteroidia	Bacteroidales	UBA932	Cryptobacteroides	Cryptobacteroides sp000431015
766	KIJ_genome_23897	Known_MAG	Bacteria	Firmicutes_A	Clostridia	Christensenellales	CAG-74	Limiplasma	Limiplasma sp900548145
767	KIJ_genome_23924	Known_MAG	Bacteria	Firmicutes_A	Clostridia	TANB77	CAG-508	CAG-273	CAG-273 sp000435755
768	KIJ_genome_23926	Known_MAG	Bacteria	Firmicutes_A	Clostridia	Oscillospirales	Oscillospiraceae	CAG-83	CAG-83 sp900554275
769	KIJ_genome_23928	Known_MAG	Bacteria	Actinobacteriota	Coriobacteriia	Coriobacteriales	Coriobacteriaceae	Collinsella
770	KIJ_genome_2393	Known_MAG	Bacteria	Fusobacteriota	Fusobacteriia	Fusobacteriales	Fusobacteriaceae	Cetobacterium_A	Cetobacterium_A sp905216205
771	KIJ_genome_23980	Known_MAG	Bacteria	Firmicutes_A	Clostridia	Lachnospirales	Lachnospiraceae	Butyribacter	Butyribacter sp001916135
772	KIJ_genome_23994	Known_MAG	Bacteria	Proteobacteria	Gammaproteobacteria	Burkholderiales	Neisseriaceae	Neisseria	Neisseria subflava
3406	MGYG000002637	Known_MAG	Bacteria	Bacteroidota	Bacteroidia	Bacteroidales	Bacteroidaceae	Prevotella	Prevotella jejuni
774	KIJ_genome_24008	Known_MAG	Bacteria	Firmicutes_A	Clostridia	Peptostreptococcales	Anaerovoracaceae	Mogibacterium	Mogibacterium diversum
775	KIJ_genome_24028	Known_MAG	Bacteria	Bacteroidota	Bacteroidia	Bacteroidales	Bacteroidaceae	Phocaeicola	Phocaeicola sp900556845
211	KIJ_genome_12862	Known_MAG	Bacteria	Bacteroidota	Bacteroidia	Bacteroidales	Bacteroidaceae	Prevotella	Prevotella lascolaii
777	KIJ_genome_24039	Known_MAG	Bacteria	Firmicutes_C	Negativicutes	Veillonellales	Veillonellaceae	Veillonella
778	KIJ_genome_24051	Known_MAG	Bacteria	Firmicutes_A	Clostridia	TANB77	CAG-508	CAG-273	CAG-273 sp003507395
779	KIJ_genome_24055	Known_MAG	Bacteria	Actinobacteriota	Actinomycetia	Actinomycetales	Actinomycetaceae	Varibaculum	Varibaculum timonense_A
780	KIJ_genome_24070	Known_MAG	Bacteria	Desulfobacterota_I	Desulfovibrionia	Desulfovibrionales	Desulfovibrionaceae	Bilophila	Bilophila sp900550745
781	KIJ_genome_24094	Known_MAG	Bacteria	Firmicutes_A	Clostridia	Lachnospirales	Lachnospiraceae	Blautia_A	Blautia_A faecis
782	KIJ_genome_24102	Known_MAG	Bacteria	Firmicutes_A	Clostridia	Oscillospirales	Acutalibacteraceae	UBA1417
803	KIJ_genome_24417	Known_MAG	Bacteria	Bacteroidota	Bacteroidia	Bacteroidales	Bacteroidaceae	Prevotella	Prevotella melaninogenica
784	KIJ_genome_24131	Known_MAG	Bacteria	Firmicutes_A	Clostridia	Oscillospirales	Oscillospiraceae	Scatomorpha	Scatomorpha sp900759385
785	KIJ_genome_24142	Known_MAG	Bacteria	Proteobacteria	Gammaproteobacteria	Burkholderiales	Burkholderiaceae	Duodenibacillus
786	KIJ_genome_24145	Known_MAG	Bacteria	Firmicutes_A	Clostridia	Lachnospirales	Lachnospiraceae	Hungatella	Hungatella effluvii
787	KIJ_genome_24172	Known_MAG	Bacteria	Firmicutes	Bacilli	Lactobacillales	Streptococcaceae	Streptococcus	Streptococcus sobrinus
788	KIJ_genome_24181	Known_MAG	Bacteria	Firmicutes_A	Clostridia	Oscillospirales	Oscillospiraceae	CAG-83	CAG-83 sp003487665
789	KIJ_genome_24185	Known_MAG	Bacteria	Firmicutes_A	Clostridia	Lachnospirales	Lachnospiraceae	Blautia	Blautia stercorigallinarum
790	KIJ_genome_24208	Known_MAG	Bacteria	Firmicutes_A	Clostridia	Lachnospirales	Lachnospiraceae	UBA11957
791	KIJ_genome_24230	Known_MAG	Bacteria	Firmicutes_A	Clostridia	Oscillospirales	UBA644	UBA644	UBA644 sp900547165
792	KIJ_genome_2425	Known_MAG	Bacteria	Firmicutes_A	Clostridia	Oscillospirales	Oscillospiraceae	CAG-170	CAG-170 sp003516765
793	KIJ_genome_24253	Known_MAG	Bacteria	Firmicutes_A	Clostridia	Lachnospirales	Lachnospiraceae	Eisenbergiella	Eisenbergiella tayi
794	KIJ_genome_24263	Known_MAG	Bacteria	Firmicutes_A	Clostridia	Lachnospirales	Lachnospiraceae	Eubacterium_G	Eubacterium_G sp000434315
795	KIJ_genome_24318	Known_MAG	Bacteria	Firmicutes_A	Clostridia	Lachnospirales	Lachnospiraceae	Enterocloster	Enterocloster sp000431375
796	KIJ_genome_2434	Known_MAG	Bacteria	Firmicutes_A	Clostridia	Oscillospirales	Ruminococcaceae	Ruminococcus_D	Ruminococcus_D bicirculans
797	KIJ_genome_24346	Known_MAG	Bacteria	Bacteroidota	Bacteroidia	Bacteroidales	Muribaculaceae	CAG-873	CAG-873 sp900540625
798	KIJ_genome_2438	Known_MAG	Bacteria	Elusimicrobiota	Elusimicrobia	Elusimicrobiales	Elusimicrobiaceae	UBA1436	UBA1436 sp900540405
799	KIJ_genome_24393	Known_MAG	Bacteria	Firmicutes_C	Negativicutes	Veillonellales	Dialisteraceae	Dialister	Dialister sp900765565
800	KIJ_genome_24397	Known_MAG	Bacteria	Firmicutes_A	Clostridia	Oscillospirales	Ruminococcaceae	Ruminiclostridium_E	Ruminiclostridium_E siraeum
801	KIJ_genome_2440	Known_MAG	Bacteria	Firmicutes_A	Clostridia	Oscillospirales	Oscillospiraceae	Lawsonibacter
802	KIJ_genome_24414	Known_MAG	Bacteria	Firmicutes_A	Clostridia	Lachnospirales	Lachnospiraceae	Mediterraneibacter	Mediterraneibacter sp900541505
3897	MGYG000003287	Known_MAG	Bacteria	Bacteroidota	Bacteroidia	Bacteroidales	Bacteroidaceae	Prevotella	Prevotella melaninogenica
804	KIJ_genome_24433	Known_MAG	Bacteria	Bacteroidota	Bacteroidia	Bacteroidales	Marinifilaceae	Odoribacter	Odoribacter splanchnicus
805	KIJ_genome_24456	Known_MAG	Bacteria	Firmicutes_A	Clostridia	Lachnospirales	Anaerotignaceae	Anaerotignum
806	KIJ_genome_24468	Known_MAG	Bacteria	Firmicutes_A	Clostridia	Lachnospirales	Lachnospiraceae	AM51-8	AM51-8 sp003478275
807	KIJ_genome_24476	Known_MAG	Bacteria	Firmicutes	Bacilli	Lactobacillales	Lactobacillaceae	Weissella	Weissella koreensis
808	KIJ_genome_245	Known_MAG	Bacteria	Firmicutes	Bacilli	RF39	UBA660	CAG-302	CAG-302 sp000431795
809	KIJ_genome_2450	Known_MAG	Bacteria	Firmicutes_C	Negativicutes	Selenomonadales	Selenomonadaceae	Megamonas	Megamonas hypermegale_A
810	KIJ_genome_24530	Known_MAG	Bacteria	Firmicutes_A	Clostridia	Lachnospirales	Lachnospiraceae	Limivivens	Limivivens sp900543575
811	KIJ_genome_24540	Known_MAG	Bacteria	Firmicutes	Bacilli	Lactobacillales	Lactobacillaceae	Lactobacillus	Lactobacillus paragasseri
812	KIJ_genome_24545	Known_MAG	Bacteria	Firmicutes	Bacilli	Erysipelotrichales	Coprobacillaceae	Erysipelatoclostridium	Erysipelatoclostridium spiroforme_A
813	KIJ_genome_2457	Known_MAG	Bacteria	Actinobacteriota	Coriobacteriia	Coriobacteriales	Eggerthellaceae	CAJFUR01	CAJFUR01 sp904420575
814	KIJ_genome_24577	Known_MAG	Bacteria	Firmicutes_A	Clostridia	Oscillospirales	CAG-272	UMGS911
815	KIJ_genome_24584	Known_MAG	Bacteria	Firmicutes_A	Clostridia	Lachnospirales	Lachnospiraceae	Choladousia	Choladousia sp900757145
816	KIJ_genome_24594	Known_MAG	Bacteria	Firmicutes	Bacilli	Haloplasmatales_A	Turicibacteraceae	Turicibacter	Turicibacter sanguinis
817	KIJ_genome_24641	Known_MAG	Bacteria	Firmicutes	Bacilli	RF39	UBA660	CAG-302	CAG-302 sp000431795
818	KIJ_genome_2465	Known_MAG	Bacteria	Bacteroidota	Bacteroidia	Bacteroidales	Porphyromonadaceae	Porphyromonas	Porphyromonas endodontalis
819	KIJ_genome_2466	Known_MAG	Bacteria	Firmicutes_A	Clostridia	Oscillospirales	Ruminococcaceae	Ruminococcus_D	Ruminococcus_D bicirculans
820	KIJ_genome_24676	Known_MAG	Bacteria	Proteobacteria	Gammaproteobacteria	Enterobacterales	Pasteurellaceae	Haemophilus_D
821	KIJ_genome_24695	Known_MAG	Bacteria	Bacteroidota	Bacteroidia	Bacteroidales	Bacteroidaceae	Bacteroides	Bacteroides sp014750685
822	KIJ_genome_24731	Known_MAG	Bacteria	Actinobacteriota	Coriobacteriia	Coriobacteriales	Coriobacteriaceae	Collinsella
823	KIJ_genome_24739	Known_MAG	Bacteria	Firmicutes_A	Clostridia	Lachnospirales	Lachnospiraceae	Lachnoclostridium_B
824	KIJ_genome_24741	Known_MAG	Bacteria	Bacteroidota	Bacteroidia	Bacteroidales	Rikenellaceae	Alistipes	Alistipes excrementigallinarum
825	KIJ_genome_24758	Known_MAG	Bacteria	Firmicutes_C	Negativicutes	Veillonellales	Dialisteraceae	Dialister
826	KIJ_genome_24760	Known_MAG	Bacteria	Firmicutes_C	Negativicutes	Selenomonadales	Massilibacillaceae	CABIZH01	CABIZH01 sp902363205
827	KIJ_genome_24770	Known_MAG	Bacteria	Actinobacteriota	Coriobacteriia	Coriobacteriales	Atopobiaceae	Thermophilibacter	Thermophilibacter timonensis
828	KIJ_genome_24816	Known_MAG	Bacteria	Campylobacterota	Campylobacteria	Campylobacterales	Helicobacteraceae
829	KIJ_genome_2482	Known_MAG	Bacteria	Bacteroidota	Bacteroidia	Bacteroidales	Rikenellaceae	Alistipes	Alistipes senegalensis
830	KIJ_genome_24873	Known_MAG	Bacteria	Bacteroidota	Bacteroidia	Bacteroidales	Porphyromonadaceae	Porphyromonas
831	KIJ_genome_24906	Known_MAG	Bacteria	Desulfobacterota_I	Desulfovibrionia	Desulfovibrionales	Desulfovibrionaceae	Desulfovibrio	Desulfovibrio sp900556755
832	KIJ_genome_24911	Known_MAG	Bacteria	Firmicutes	Bacilli	Lactobacillales	Lactobacillaceae	Lactiplantibacillus	Lactiplantibacillus plantarum
833	KIJ_genome_2492	Known_MAG	Bacteria	Firmicutes	Bacilli	RF39	UBA660	Aphodocola	Aphodocola sp000434835
834	KIJ_genome_24948	Known_MAG	Bacteria	Firmicutes	Bacilli	Lactobacillales	Enterococcaceae	Enterococcus_B	Enterococcus_B lactis
835	KIJ_genome_24953	Known_MAG	Bacteria	Firmicutes_A	Clostridia	Lachnospirales	Lachnospiraceae	Lachnoclostridium_A	Lachnoclostridium_A sp002160755
836	KIJ_genome_24966	Known_MAG	Bacteria	Firmicutes_C	Negativicutes	Veillonellales	Dialisteraceae	Allisonella	Allisonella histaminiformans
837	KIJ_genome_25009	Known_MAG	Bacteria	Firmicutes_A	Clostridia	Lachnospirales	Lachnospiraceae	Merdiplasma	Merdiplasma excrementigallinarum
838	KIJ_genome_25016	Known_MAG	Bacteria	Firmicutes_A	Clostridia	Oscillospirales	Acutalibacteraceae	Acutalibacter	Acutalibacter ornithocaccae
839	KIJ_genome_25023	Known_MAG	Bacteria	Firmicutes_A	Clostridia	Lachnospirales	Lachnospiraceae	CAG-303	CAG-303 sp000437755
840	KIJ_genome_2505	Known_MAG	Bacteria	Firmicutes_A	Clostridia	Lachnospirales	Lachnospiraceae	Sellimonas	Sellimonas avistercoris
841	KIJ_genome_25066	Known_MAG	Bacteria	Fusobacteriota	Fusobacteriia	Fusobacteriales	Fusobacteriaceae	Fusobacterium	Fusobacterium vincentii
842	KIJ_genome_25084	Known_MAG	Bacteria	Firmicutes_A	Clostridia	Oscillospirales	Oscillospiraceae	CAG-83	CAG-83 sp000435975
843	KIJ_genome_2511	Known_MAG	Bacteria	Proteobacteria	Gammaproteobacteria	Burkholderiales	Burkholderiaceae	Sutterella	Sutterella wadsworthensis
844	KIJ_genome_25141	Known_MAG	Bacteria	Firmicutes_A	Clostridia	Oscillospirales	Oscillospiraceae	Scatomorpha	Scatomorpha merdavium
845	KIJ_genome_25186	Known_MAG	Bacteria	Firmicutes	Bacilli	Lactobacillales	Lactobacillaceae	Weissella	Weissella cibaria
846	KIJ_genome_25187	Known_MAG	Bacteria	Firmicutes_A	Clostridia	Monoglobales	Monoglobaceae	Roslinia
847	KIJ_genome_25210	Known_MAG	Bacteria	Firmicutes	Bacilli	RF39	UBA660	CAG-605	CAG-605 sp000433255
848	KIJ_genome_25213	Known_MAG	Bacteria	Firmicutes_A	Clostridia	Lachnospirales	Lachnospiraceae	Enterocloster	Enterocloster sp900541315
849	KIJ_genome_25248	Known_MAG	Bacteria	Firmicutes_C	Negativicutes	Acidaminococcales	Acidaminococcaceae	Phascolarctobacterium	Phascolarctobacterium faecium
850	KIJ_genome_25296	Known_MAG	Bacteria	Firmicutes_A	Clostridia	Oscillospirales	CAG-272	CAG-724	CAG-724 sp003524145
851	KIJ_genome_25299	Known_MAG	Bacteria	Bacteroidota	Bacteroidia	Bacteroidales	Bacteroidaceae	Paraprevotella	Paraprevotella sp905215575
852	KIJ_genome_25303	Known_MAG	Bacteria	Firmicutes	Bacilli	RF39	UBA660	CAG-302	CAG-302 sp900543825
853	KIJ_genome_25311	Known_MAG	Bacteria	Firmicutes_C	Negativicutes	Veillonellales	Dialisteraceae	Dialister	Dialister sp000434475
854	KIJ_genome_2532	Known_MAG	Bacteria	Actinobacteriota	Coriobacteriia	Coriobacteriales	QAMH01	QAMH01
855	KIJ_genome_25351	Known_MAG	Bacteria	Firmicutes	Bacilli	RF39	UBA660
856	KIJ_genome_25391	Known_MAG	Bacteria	Proteobacteria	Gammaproteobacteria	Enterobacterales	Pasteurellaceae	Haemophilus_D
2767	MGYG000001720	Known_MAG	Bacteria	Bacteroidota	Bacteroidia	Bacteroidales	Bacteroidaceae	Prevotella	Prevotella mizrahii
858	KIJ_genome_25434	Known_MAG	Bacteria	Firmicutes	Bacilli	Erysipelotrichales	Coprobacillaceae	Faecalibacillus	Faecalibacillus intestinalis
859	KIJ_genome_25440	Known_MAG	Bacteria	Firmicutes	Bacilli	Lactobacillales	Streptococcaceae	Streptococcus
860	KIJ_genome_25446	Known_MAG	Bacteria	Firmicutes_A	Clostridia	Oscillospirales	Acutalibacteraceae
861	KIJ_genome_25460	Known_MAG	Bacteria	Firmicutes_A	Clostridia	Oscillospirales	Acutalibacteraceae	Caccousia	Caccousia avistercoris
862	KIJ_genome_25473	Known_MAG	Bacteria	Firmicutes_A	Clostridia	Lachnospirales	Lachnospiraceae	Clostridium_Q	Clostridium_Q saccharolyticum_A
863	KIJ_genome_25474	Known_MAG	Bacteria	Actinobacteriota	Actinomycetia	Actinomycetales	Bifidobacteriaceae	Bifidobacterium	Bifidobacterium vaginale_E
864	KIJ_genome_25494	Known_MAG	Bacteria	Bacteroidota	Bacteroidia	Bacteroidales	Marinifilaceae	Butyricimonas	Butyricimonas virosa
865	KIJ_genome_25502	Known_MAG	Bacteria	Firmicutes_A	Clostridia	Lachnospirales	Anaerotignaceae	UBA8514
866	KIJ_genome_25590	Known_MAG	Bacteria	Firmicutes_A	Clostridia	Oscillospirales	CAG-272	Flemingibacterium	Flemingibacterium sp900546315
867	KIJ_genome_25611	Known_MAG	Bacteria	Firmicutes_A	Clostridia	Lachnospirales	Lachnospiraceae	CAG-95	CAG-95 sp000438155
868	KIJ_genome_25635	Known_MAG	Bacteria	Firmicutes_A	Clostridia	Oscillospirales	Oscillospiraceae	Enterenecus
869	KIJ_genome_25665	Known_MAG	Bacteria	Firmicutes_A	Clostridia	Oscillospirales	Acutalibacteraceae	Avimonas_A	Avimonas_A narfia
870	KIJ_genome_25700	Known_MAG	Bacteria	Firmicutes_A	Clostridia	Lachnospirales	Lachnospiraceae	KLE1615	KLE1615 sp900066985
871	KIJ_genome_25722	Known_MAG	Bacteria	Firmicutes_A	Clostridia	Christensenellales	CAG-917	CAG-475	CAG-475 sp000434435
872	KIJ_genome_25729	Known_MAG	Bacteria	Verrucomicrobiota	Verrucomicrobiae	Opitutales	CAG-312	Merdousia	Merdousia sp000438015
873	KIJ_genome_25762	Known_MAG	Bacteria	Firmicutes_A	Clostridia	Oscillospirales	Ruminococcaceae	Faecalibacterium	Faecalibacterium sp900539945
874	KIJ_genome_25787	Known_MAG	Bacteria	Firmicutes_A	Clostridia	Oscillospirales	CAG-272	UMGS902	UMGS902 sp900761025
875	KIJ_genome_25792	Known_MAG	Bacteria	Proteobacteria	Gammaproteobacteria	Enterobacterales	Pasteurellaceae	Haemophilus_D	Haemophilus_D parainfluenzae_K
876	KIJ_genome_25795	Known_MAG	Bacteria	Firmicutes_A	Clostridia	Lachnospirales	Lachnospiraceae	Clostridium_AP	Clostridium_AP scindens
877	KIJ_genome_25800	Known_MAG	Bacteria	Proteobacteria	Gammaproteobacteria	Enterobacterales	Pasteurellaceae	Haemophilus_D	Haemophilus_D sp001815355
878	KIJ_genome_25824	Known_MAG	Bacteria	Proteobacteria	Gammaproteobacteria	Burkholderiales	Burkholderiaceae	Sutterella	Sutterella sp905206365
879	KIJ_genome_25861	Known_MAG	Bacteria	Firmicutes_A	Clostridia	Lachnospirales	Lachnospiraceae	Blautia	Blautia pullicola
880	KIJ_genome_25871	Known_MAG	Bacteria	Proteobacteria	Gammaproteobacteria	Enterobacterales	Enterobacteriaceae	Klebsiella	Klebsiella michiganensis
881	KIJ_genome_25880	Known_MAG	Bacteria	Firmicutes_A	Clostridia	Oscillospirales	Acutalibacteraceae	Howiella	Howiella intestinavium
4398	MGYG000003893	Known_MAG	Bacteria	Bacteroidota	Bacteroidia	Bacteroidales	Bacteroidaceae	Prevotella	Prevotella multisaccharivorax
883	KIJ_genome_25965	Known_MAG	Bacteria	Firmicutes_C	Negativicutes	Veillonellales	Megasphaeraceae	Anaeroglobus	Anaeroglobus micronuciformis
884	KIJ_genome_25973	Known_MAG	Bacteria	Firmicutes_A	Clostridia	Oscillospirales	Oscillospiraceae	Pseudoscilispira	Pseudoscilispira sp018369915
885	KIJ_genome_25981	Known_MAG	Bacteria	Firmicutes_A	Clostridia	Oscillospirales	Oscillospiraceae	Faecousia	Faecousia sp003525905
886	KIJ_genome_25983	Known_MAG	Bacteria	Firmicutes_C	Negativicutes	Veillonellales	Megasphaeraceae	Megasphaera	Megasphaera elsdenii
887	KIJ_genome_25985	Known_MAG	Bacteria	Firmicutes_A	Clostridia	Lachnospirales	Lachnospiraceae	Acetatifactor	Acetatifactor sp900066565
888	KIJ_genome_26005	Known_MAG	Bacteria	Firmicutes_A	Clostridia	Oscillospirales	Acutalibacteraceae	Fimivicinus	Fimivicinus sp900544375
889	KIJ_genome_26029	Known_MAG	Bacteria	Firmicutes_A	Clostridia	Lachnospirales	Lachnospiraceae	Lachnospira	Lachnospira sp900316325
890	KIJ_genome_26053	Known_MAG	Bacteria	Firmicutes_A	Clostridia	Lachnospirales	Lachnospiraceae	Butyrivibrio_A	Butyrivibrio_A sp000431815
891	KIJ_genome_26092	Known_MAG	Bacteria	Actinobacteriota	Coriobacteriia	Coriobacteriales	Coriobacteriaceae	Collinsella	Collinsella sp900541675
892	KIJ_genome_26186	Known_MAG	Bacteria	Bacteroidota	Bacteroidia	Bacteroidales	Bacteroidaceae	Phocaeicola	Phocaeicola sp900546645
893	KIJ_genome_26192	Known_MAG	Bacteria	Firmicutes_A	Clostridia	Oscillospirales	Ruminococcaceae	Ruminococcus_C	Ruminococcus_C sp000980705
894	KIJ_genome_26227	Known_MAG	Bacteria	Firmicutes_A	Clostridia	Lachnospirales	Lachnospiraceae	Faecalimonas	Faecalimonas phoceensis
895	KIJ_genome_2625	Known_MAG	Bacteria	Actinobacteriota	Actinomycetia	Actinomycetales	Actinomycetaceae	Pauljensenia
4895	MGYG000004627	Known_MAG	Bacteria	Bacteroidota	Bacteroidia	Bacteroidales	Bacteroidaceae	Prevotella	Prevotella nigrescens
2532	MGYG000001447	Known_MAG	Bacteria	Bacteroidota	Bacteroidia	Bacteroidales	Bacteroidaceae	Prevotella	Prevotella oralis
898	KIJ_genome_26333	Known_MAG	Bacteria	Firmicutes_A	Clostridia	Oscillospirales	Ruminococcaceae	Ruminococcus_D	Ruminococcus_D bicirculans
899	KIJ_genome_26379	Known_MAG	Bacteria	Cyanobacteria	Vampirovibrionia	Gastranaerophilales	Gastranaerophilaceae	Scatousia	Scatousia sp900321895
900	KIJ_genome_26382	Known_MAG	Bacteria	Firmicutes_A	Clostridia	Lachnospirales	CAG-274	Gallispira	Gallispira sp905201505
901	KIJ_genome_26385	Known_MAG	Bacteria	Firmicutes	Bacilli	RFN20	CAG-826	Onthovivens
902	KIJ_genome_26421	Known_MAG	Bacteria	Firmicutes_A	Clostridia	Lachnospirales	Anaerotignaceae	Anaerotignum
903	KIJ_genome_26461	Known_MAG	Bacteria	Firmicutes_A	Clostridia	Oscillospirales	Butyricicoccaceae	Agathobaculum	Agathobaculum sp900291975
904	KIJ_genome_26482	Known_MAG	Bacteria	Firmicutes	Bacilli	RF39	UBA660	Faecenecus
905	KIJ_genome_26503	Known_MAG	Bacteria	Actinobacteriota	Actinomycetia	Actinomycetales	Actinomycetaceae	Pauljensenia
906	KIJ_genome_26511	Known_MAG	Bacteria	Firmicutes_A	Clostridia	Christensenellales	CAG-74	UBA11524	UBA11524 sp000437595
907	KIJ_genome_26568	Known_MAG	Bacteria	Firmicutes_A	Clostridia	Oscillospirales	Ruminococcaceae	Avimicrobium	Avimicrobium caecorum
908	KIJ_genome_26604	Known_MAG	Bacteria	Firmicutes_A	Clostridia	Lachnospirales	Lachnospiraceae
909	KIJ_genome_2661	Known_MAG	Bacteria	Proteobacteria	Gammaproteobacteria	Enterobacterales	Pasteurellaceae	Haemophilus_D	Haemophilus_D parainfluenzae_K
910	KIJ_genome_26612	Known_MAG	Bacteria	Firmicutes_A	Clostridia	Oscillospirales	Butyricicoccaceae	Pseudobutyricicoccus
911	KIJ_genome_26619	Known_MAG	Bacteria	Proteobacteria	Gammaproteobacteria	Enterobacterales	Enterobacteriaceae	Escherichia	Escherichia coli
912	KIJ_genome_26631	Known_MAG	Bacteria	Firmicutes_A	Clostridia	Lachnospirales	Lachnospiraceae	Butyribacter	Butyribacter sp003149875
913	KIJ_genome_26636	Known_MAG	Bacteria	Firmicutes_C	Negativicutes	Veillonellales	Veillonellaceae	Veillonella	Veillonella parvula_A
914	KIJ_genome_26712	Known_MAG	Bacteria	Actinobacteriota	Coriobacteriia	Coriobacteriales	Eggerthellaceae	CAG-1427	CAG-1427 sp000436075
915	KIJ_genome_26713	Known_MAG	Bacteria	Firmicutes_A	Clostridia	Lachnospirales	Lachnospiraceae	Copromonas	Copromonas sp900066535
916	KIJ_genome_26744	Known_MAG	Bacteria	Firmicutes_A	Clostridia	Lachnospirales	Lachnospiraceae	Blautia_A	Blautia_A sp900551715
917	KIJ_genome_26748	Known_MAG	Bacteria	Firmicutes_A	Clostridia	Oscillospirales	Ruminococcaceae	Ruminococcus_C	Ruminococcus_C sp000433635
918	KIJ_genome_26760	Known_MAG	Bacteria	Fusobacteriota	Fusobacteriia	Fusobacteriales	Fusobacteriaceae	Fusobacterium_A	Fusobacterium_A ulcerans_A
919	KIJ_genome_26773	Known_MAG	Bacteria	Firmicutes_A	Clostridia	Monoglobales	Monoglobaceae	Monoglobus
920	KIJ_genome_26777	Known_MAG	Bacteria	Firmicutes	Bacilli	RF39	UBA660	CAG-302	CAG-302 sp001916775
921	KIJ_genome_26818	Known_MAG	Bacteria	Firmicutes_A	Clostridia	Oscillospirales	Oscillospiraceae	Oscillibacter	Oscillibacter ruminantium
922	KIJ_genome_2683	Known_MAG	Bacteria	Campylobacterota	Campylobacteria	Campylobacterales	Campylobacteraceae	Campylobacter_A	Campylobacter_A concisus_F
923	KIJ_genome_26854	Known_MAG	Bacteria	Firmicutes_A	Clostridia	Oscillospirales	Acutalibacteraceae	CAG-177	CAG-177 sp003538135
924	KIJ_genome_26885	Known_MAG	Bacteria	Firmicutes_A	Clostridia	Oscillospirales	Ruminococcaceae	Gemmiger	Gemmiger excrementavium
925	KIJ_genome_26918	Known_MAG	Bacteria	Firmicutes_A	Clostridia	Oscillospirales	Acutalibacteraceae	UMGS1071	UMGS1071 sp900541905
926	KIJ_genome_26950	Known_MAG	Bacteria	Firmicutes_A	Clostridia	Christensenellales	QALW01	QALW01	QALW01 sp900552055
927	KIJ_genome_26963	Known_MAG	Bacteria	Firmicutes_A	Clostridia	Oscillospirales	Oscillospiraceae	An92
928	KIJ_genome_26964	Known_MAG	Bacteria	Firmicutes_A	Clostridia	Oscillospirales	CAG-382	UBA1206	UBA1206 sp000433115
929	KIJ_genome_2698	Known_MAG	Bacteria	Firmicutes_A	Clostridia	Oscillospirales	Oscillospiraceae	Limivicinus
930	KIJ_genome_26990	Known_MAG	Bacteria	Bacteroidota	Bacteroidia	Bacteroidales	Muribaculaceae	Sodaliphilus
931	KIJ_genome_26996	Known_MAG	Bacteria	Bacteroidota	Bacteroidia	Bacteroidales	Coprobacteraceae	Coprobacter	Coprobacter fastidiosus
932	KIJ_genome_27	Known_MAG	Bacteria	Firmicutes_A	Clostridia	Oscillospirales	Oscillospiraceae	Scatomorpha	Scatomorpha sp900545405
933	KIJ_genome_27002	Known_MAG	Bacteria	Firmicutes_A	Clostridia	Peptostreptococcales	Anaerovoracaceae	Fimisoma	Fimisoma avicola
934	KIJ_genome_27009	Known_MAG	Bacteria	Actinobacteriota	Coriobacteriia	Coriobacteriales	Coriobacteriaceae	Collinsella
935	KIJ_genome_27015	Known_MAG	Bacteria	Actinobacteriota	Coriobacteriia	Coriobacteriales	Coriobacteriaceae	Collinsella
936	KIJ_genome_2704	Known_MAG	Bacteria	Firmicutes_A	Clostridia	Oscillospirales	Oscillospiraceae	Evtepia	Evtepia gabavorous
937	KIJ_genome_27041	Known_MAG	Bacteria	Firmicutes_A	Clostridia	Christensenellales	CAG-74	Faecivicinus	Faecivicinus avistercoris
938	KIJ_genome_2707	Known_MAG	Bacteria	Verrucomicrobiota	Verrucomicrobiae	Opitutales	CAG-312	Merdousia
939	KIJ_genome_27081	Known_MAG	Bacteria	Proteobacteria	Gammaproteobacteria	Enterobacterales	Succinivibrionaceae	Succinivibrio	Succinivibrio sp900548485
940	KIJ_genome_27083	Known_MAG	Bacteria	Proteobacteria	Gammaproteobacteria	Pseudomonadales	Pseudomonadaceae	Pseudomonas	Pseudomonas aeruginosa
941	KIJ_genome_27084	Known_MAG	Bacteria	Bacteroidota	Bacteroidia	Bacteroidales	Rikenellaceae	Alistipes	Alistipes timonensis
942	KIJ_genome_27086	Known_MAG	Bacteria	Firmicutes_A	Clostridia	Lachnospirales	Lachnospiraceae	Mediterraneibacter	Mediterraneibacter sp014287475
943	KIJ_genome_2713	Known_MAG	Bacteria	Proteobacteria	Gammaproteobacteria	Burkholderiales	Burkholderiaceae	Aphodousia	Aphodousia sp900544345
944	KIJ_genome_27145	Known_MAG	Bacteria	Firmicutes	Bacilli	Lactobacillales	Lactobacillaceae	Lactobacillus	Lactobacillus delbrueckii_B
945	KIJ_genome_27168	Known_MAG	Bacteria	Bacteroidota	Bacteroidia	Bacteroidales	Muribaculaceae	CAG-873
946	KIJ_genome_27203	Known_MAG	Bacteria	Firmicutes_A	Clostridia	Christensenellales	CAG-74	UBA11524	UBA11524 sp000437595
947	KIJ_genome_2722	Known_MAG	Bacteria	Actinobacteriota	Coriobacteriia	Coriobacteriales	Coriobacteriaceae	Collinsella
948	KIJ_genome_27312	Known_MAG	Bacteria	Proteobacteria	Alphaproteobacteria	RF32	CAG-239	Scatocola	Scatocola faecipullorum
949	KIJ_genome_27326	Known_MAG	Bacteria	Firmicutes_A	Clostridia	Oscillospirales	Oscillospiraceae	Enterenecus	Enterenecus sp905210385
950	KIJ_genome_27360	Known_MAG	Bacteria	Firmicutes	Bacilli	Erysipelotrichales	Erysipelotrichaceae	Absicoccus	Absicoccus sp000434355
951	KIJ_genome_2742	Known_MAG	Bacteria	Firmicutes_A	Clostridia	Oscillospirales	Acutalibacteraceae	Eubacterium_R	Eubacterium_R sp900540235
952	KIJ_genome_27484	Known_MAG	Bacteria	Actinobacteriota	Coriobacteriia	Coriobacteriales	Coriobacteriaceae	Collinsella
953	KIJ_genome_27496	Known_MAG	Bacteria	Firmicutes_A	Clostridia	Lachnospirales	Lachnospiraceae	Faecalimonas	Faecalimonas sp000209385
954	KIJ_genome_27537	Known_MAG	Bacteria	Firmicutes_B	Dehalobacteriia	UBA4068	UBA4068	HGM13862
955	KIJ_genome_27541	Known_MAG	Bacteria	Proteobacteria	Gammaproteobacteria	Burkholderiales	Burkholderiaceae	Aphodousia
956	KIJ_genome_27561	Known_MAG	Bacteria	Firmicutes	Bacilli	RF39	UBA660	Ventrenecus	Ventrenecus sp905205665
957	KIJ_genome_27572	Known_MAG	Bacteria	Firmicutes_A	Clostridia	Oscillospirales	Oscillospiraceae	Limivicinus
958	KIJ_genome_27590	Known_MAG	Bacteria	Actinobacteriota	Coriobacteriia	Coriobacteriales	Eggerthellaceae	Gordonibacter	Gordonibacter avicola
959	KIJ_genome_27603	Known_MAG	Bacteria	Firmicutes_A	Clostridia	Oscillospirales	Butyricicoccaceae	UBA4644	UBA4644 sp900555855
960	KIJ_genome_27635	Known_MAG	Bacteria	Firmicutes_A	Clostridia	Oscillospirales	Acutalibacteraceae	Acutalibacter	Acutalibacter sp900548545
961	KIJ_genome_27659	Known_MAG	Bacteria	Firmicutes_A	Clostridia	Oscillospirales	Ruminococcaceae	Gemmiger	Gemmiger avicola
962	KIJ_genome_27692	Known_MAG	Bacteria	Firmicutes_A	Clostridia	Oscillospirales	Acutalibacteraceae	UMGS1591
963	KIJ_genome_27696	Known_MAG	Bacteria	Firmicutes_A	Clostridia	Lachnospirales	Lachnospiraceae	TWA4
964	KIJ_genome_27710	Known_MAG	Bacteria	Firmicutes_A	Clostridia	Lachnospirales	Cellulosilyticaceae	Cellulosilyticum
965	KIJ_genome_27722	Known_MAG	Bacteria	Actinobacteriota	Coriobacteriia	Coriobacteriales	Eggerthellaceae	Eggerthella	Eggerthella lenta
966	KIJ_genome_27742	Known_MAG	Bacteria	Patescibacteria	Saccharimonadia	Saccharimonadales	Nanoperiomorbaceae	Nanoperiomorbus
967	KIJ_genome_27746	Known_MAG	Bacteria	Proteobacteria	Gammaproteobacteria	Enterobacterales	Enterobacteriaceae	Citrobacter	Citrobacter freundii_A
968	KIJ_genome_2776	Known_MAG	Bacteria	Firmicutes_A	Clostridia	Lachnospirales	Lachnospiraceae	CAG-882	CAG-882 sp003486385
969	KIJ_genome_27771	Known_MAG	Bacteria	Verrucomicrobiota	Verrucomicrobiae	Verrucomicrobiales	Akkermansiaceae	Akkermansia	Akkermansia muciniphila_B
970	KIJ_genome_27782	Known_MAG	Bacteria	Firmicutes_A	Clostridia	Oscillospirales	Acutalibacteraceae	Acutalibacter	Acutalibacter sp904374805
971	KIJ_genome_27791	Known_MAG	Bacteria	Proteobacteria	Gammaproteobacteria	Enterobacterales	Pasteurellaceae	Haemophilus_D	Haemophilus_D parainfluenzae
972	KIJ_genome_27796	Known_MAG	Bacteria	Firmicutes_A	Clostridia	Oscillospirales	Oscillospiraceae	Scatomorpha
973	KIJ_genome_27918	Known_MAG	Bacteria	Firmicutes_C	Negativicutes	Veillonellales	Megasphaeraceae	Anaeroglobus	Anaeroglobus micronuciformis
974	KIJ_genome_27980	Known_MAG	Bacteria	Bacteroidota	Bacteroidia	Bacteroidales	Coprobacteraceae	Coprobacter	Coprobacter secundus
975	KIJ_genome_28010	Known_MAG	Bacteria	Proteobacteria	Gammaproteobacteria	Enterobacterales	Enterobacteriaceae	Enterobacter	Enterobacter hormaechei
976	KIJ_genome_2803	Known_MAG	Bacteria	Proteobacteria	Gammaproteobacteria	Burkholderiales	Burkholderiaceae	Oxalobacter	Oxalobacter sp900760095
977	KIJ_genome_28030	Known_MAG	Bacteria	Proteobacteria	Gammaproteobacteria	Enterobacterales	Pasteurellaceae	Haemophilus_D	Haemophilus_D sp001815355
978	KIJ_genome_28052	Known_MAG	Bacteria	Firmicutes	Bacilli	Erysipelotrichales	Erysipelotrichaceae	Dielma	Dielma fastidiosa
979	KIJ_genome_28073	Known_MAG	Bacteria	Firmicutes	Bacilli	RF39	UBA660	Faecimonas	Faecimonas intestinavium
980	KIJ_genome_28074	Known_MAG	Bacteria	Firmicutes_A	Clostridia	Oscillospirales	Acutalibacteraceae	RGIG4076	RGIG4076 sp905198155
981	KIJ_genome_28089	Known_MAG	Bacteria	Firmicutes_A	Clostridia	Oscillospirales	CAG-272	UMGS1865	UMGS1865 sp900768535
982	KIJ_genome_28129	Known_MAG	Bacteria	Firmicutes_C	Negativicutes	Acidaminococcales	Acidaminococcaceae	CAG-266	CAG-266 sp000436095
983	KIJ_genome_28179	Known_MAG	Bacteria	Firmicutes_A	Clostridia	Oscillospirales	Ruminococcaceae	Gemmiger
984	KIJ_genome_28212	Known_MAG	Bacteria	Bacteroidota	Bacteroidia	Bacteroidales	Bacteroidaceae	OM05-12
985	KIJ_genome_28215	Known_MAG	Bacteria	Firmicutes_A	Clostridia	Lachnospirales	Lachnospiraceae	CAJJNI01	CAJJNI01 sp905193085
986	KIJ_genome_28248	Known_MAG	Bacteria	Actinobacteriota	Coriobacteriia	Coriobacteriales	Eggerthellaceae	CAG-1427	CAG-1427 sp900544455
987	KIJ_genome_28286	Known_MAG	Bacteria	Firmicutes_A	Clostridia	Oscillospirales	Ruminococcaceae	Gemmiger	Gemmiger sp900540595
988	KIJ_genome_28294	Known_MAG	Bacteria	Firmicutes_A	Clostridia	Christensenellales	CAG-314	Fimimonas	Fimimonas sp003537755
4385	MGYG000003878	Known_MAG	Bacteria	Bacteroidota	Bacteroidia	Bacteroidales	Bacteroidaceae	Prevotella	Prevotella oris
990	KIJ_genome_28308	Known_MAG	Bacteria	Firmicutes	Bacilli	Lactobacillales	Lactobacillaceae	Lactobacillus	Lactobacillus crispatus
991	KIJ_genome_28317	Known_MAG	Bacteria	Firmicutes_A	Clostridia	Oscillospirales	Ruminococcaceae	Ruminococcus_D	Ruminococcus_D bicirculans
992	KIJ_genome_28339	Known_MAG	Bacteria	Firmicutes_A	Clostridia	Oscillospirales	Acutalibacteraceae	Eubacterium_R	Eubacterium_R sp000434995
993	KIJ_genome_28366	Known_MAG	Bacteria	Firmicutes_C	Negativicutes	Veillonellales	Megasphaeraceae	Megasphaera	Megasphaera sp000417505
994	KIJ_genome_28420	Known_MAG	Bacteria	Firmicutes_A	Clostridia	Oscillospirales	Butyricicoccaceae	Butyricicoccus
995	KIJ_genome_28430	Known_MAG	Bacteria	Actinobacteriota	Coriobacteriia	Coriobacteriales	Eggerthellaceae	UMGS1519	UMGS1519 sp900552585
996	KIJ_genome_28440	Known_MAG	Bacteria	Bacteroidota	Bacteroidia	Bacteroidales	UBA932	Cryptobacteroides	Cryptobacteroides sp900544195
997	KIJ_genome_28455	Known_MAG	Bacteria	Bacteroidota	Bacteroidia	Bacteroidales	Rikenellaceae	Alistipes	Alistipes putredinis
998	KIJ_genome_28495	Known_MAG	Bacteria	Firmicutes_A	Clostridia	Lachnospirales	Lachnospiraceae	Mediterraneibacter	Mediterraneibacter sp900752395
999	KIJ_genome_28521	Known_MAG	Bacteria	Bacteroidota	Bacteroidia	Bacteroidales	Rikenellaceae	Alistipes_A
1206	KIJ_genome_6383	Known_MAG	Bacteria	Bacteroidota	Bacteroidia	Bacteroidales	Bacteroidaceae	Prevotella	Prevotella pectinovora
1001	KIJ_genome_28543	Known_MAG	Bacteria	Actinobacteriota	Coriobacteriia	Coriobacteriales	Coriobacteriaceae	Collinsella
1002	KIJ_genome_28567	Known_MAG	Bacteria	Firmicutes_A	Clostridia	Oscillospirales	Oscillospiraceae	Lawsonibacter	Lawsonibacter sp905215425
1003	KIJ_genome_28597	Known_MAG	Bacteria	Firmicutes_A	Clostridia	Oscillospirales	Acutalibacteraceae	Heritagella
1004	KIJ_genome_28600	Known_MAG	Bacteria	Firmicutes_A	Clostridia	Lachnospirales	Lachnospiraceae	Eubacterium_G	Eubacterium_G ventriosum
1005	KIJ_genome_28650	Known_MAG	Bacteria	Firmicutes_A	Clostridia	Lachnospirales	Anaerotignaceae	Metalachnospira	Metalachnospira sp902406135
1006	KIJ_genome_28686	Known_MAG	Bacteria	Firmicutes_A	Clostridia	Oscillospirales	Acutalibacteraceae	Limousia	Limousia pullorum
1007	KIJ_genome_28707	Known_MAG	Bacteria	Bacteroidota	Bacteroidia	Bacteroidales	Rikenellaceae	Alistipes	Alistipes communis
1008	KIJ_genome_28724	Known_MAG	Bacteria	Firmicutes_A	Clostridia	Lachnospirales	Lachnospiraceae	Bariatricus	Bariatricus comes
1009	KIJ_genome_28736	Known_MAG	Bacteria	Firmicutes_A	Clostridia	Lachnospirales	Lachnospiraceae	Coprococcus_A	Coprococcus_A sp900548825
1010	KIJ_genome_28737	Known_MAG	Bacteria	Firmicutes_A	Clostridia	Oscillospirales	Acutalibacteraceae
1011	KIJ_genome_28781	Known_MAG	Bacteria	Proteobacteria	Gammaproteobacteria	Enterobacterales	Enterobacteriaceae	Enterobacter	Enterobacter roggenkampii
1012	KIJ_genome_28784	Known_MAG	Bacteria	Firmicutes_A	Clostridia	Oscillospirales	Ruminococcaceae	Faecalibacterium	Faecalibacterium prausnitzii_G
96	KIJ_genome_10182	Known_MAG	Bacteria	Bacteroidota	Bacteroidia	Bacteroidales	Bacteroidaceae	Prevotella	Prevotella rara
1014	KIJ_genome_28813	Known_MAG	Bacteria	Bacteroidota	Bacteroidia	Bacteroidales	Bacteroidaceae	UBA6398	UBA6398 sp003150315
1015	KIJ_genome_28831	Known_MAG	Bacteria	Firmicutes_A	Clostridia	Lachnospirales	Lachnospiraceae	Blautia_A
1016	KIJ_genome_28841	Known_MAG	Bacteria	Firmicutes_A	Clostridia	Lachnospirales	Lachnospiraceae	Enterocloster	Enterocloster clostridioformis
2472	MGYG000001360	Known_MAG	Bacteria	Bacteroidota	Bacteroidia	Bacteroidales	Bacteroidaceae	Prevotella	Prevotella salivae
1018	KIJ_genome_28853	Known_MAG	Bacteria	Firmicutes_A	Clostridia	Oscillospirales	Ruminococcaceae	Fournierella	Fournierella excrementavium
1019	KIJ_genome_28867	Known_MAG	Bacteria	Firmicutes_A	Clostridia	Lachnospirales	UBA1390	Faecimorpha
1020	KIJ_genome_28901	Known_MAG	Bacteria	Firmicutes_A	Clostridia	Lachnospirales	UBA1390	Faecimorpha
1021	KIJ_genome_28902	Known_MAG	Bacteria	Bacteroidota	Bacteroidia	Bacteroidales	Rikenellaceae	Alistipes	Alistipes shahii
1022	KIJ_genome_28918	Known_MAG	Bacteria	Firmicutes_A	Clostridia	Christensenellales	CAG-74	Ventricola	Ventricola sp900542395
1023	KIJ_genome_28921	Known_MAG	Bacteria	Firmicutes_A	Clostridia	Peptostreptococcales	Anaerovoracaceae	Fimisoma
1024	KIJ_genome_28925	Known_MAG	Bacteria	Fusobacteriota	Fusobacteriia	Fusobacteriales	Fusobacteriaceae	Fusobacterium_A	Fusobacterium_A ulcerans
1025	KIJ_genome_28927	Known_MAG	Bacteria	Actinobacteriota	Coriobacteriia	Coriobacteriales	Eggerthellaceae	CAG-1427	CAG-1427 sp000435475
1026	KIJ_genome_28945	Known_MAG	Bacteria	Actinobacteriota	Coriobacteriia	Coriobacteriales	Coriobacteriaceae	Collinsella	Collinsella sp900541695
1027	KIJ_genome_28958	Known_MAG	Bacteria	Firmicutes_A	Clostridia	Oscillospirales	Oscillospiraceae	Dysosmobacter	Dysosmobacter sp001916835
1028	KIJ_genome_28971	Known_MAG	Bacteria	Firmicutes_A	Clostridia	Christensenellales	Borkfalkiaceae	Borkfalkia
1029	KIJ_genome_28982	Known_MAG	Bacteria	Firmicutes_A	Clostridia	Oscillospirales	Acutalibacteraceae	Acutalibacter
1030	KIJ_genome_29006	Known_MAG	Bacteria	Firmicutes_A	Clostridia	Lachnospirales	Anaerotignaceae	Anaerotignum	Anaerotignum sp001304995
1031	KIJ_genome_29017	Known_MAG	Bacteria	Firmicutes	Bacilli	RF39	UBA660	CAG-1193	CAG-1193 sp900550145
1032	KIJ_genome_29022	Known_MAG	Bacteria	Bacteroidota	Bacteroidia	Bacteroidales	Muribaculaceae	Sodaliphilus	Sodaliphilus sp004557565
1033	KIJ_genome_29042	Known_MAG	Bacteria	Desulfobacterota_I	Desulfovibrionia	Desulfovibrionales	Desulfovibrionaceae	Mailhella
1034	KIJ_genome_2908	Known_MAG	Bacteria	Firmicutes_A	Clostridia	Peptostreptococcales	Anaerovoracaceae	Alterileibacterium	Alterileibacterium massiliense
1035	KIJ_genome_2936	Known_MAG	Bacteria	Firmicutes_A	Clostridia	Oscillospirales	Ruminococcaceae	Ruminiclostridium_E	Ruminiclostridium_E siraeum
1036	KIJ_genome_2942	Known_MAG	Bacteria	Bacteroidota	Bacteroidia	Bacteroidales	Rikenellaceae	Alistipes	Alistipes sp002362235
1037	KIJ_genome_2948	Known_MAG	Bacteria	Firmicutes_A	Clostridia	Lachnospirales	Lachnospiraceae	Butyribacter	Butyribacter sp003529475
1038	KIJ_genome_2952	Known_MAG	Bacteria	Firmicutes_A	Clostridia	Oscillospirales	Ruminococcaceae	Gemmiger
1039	KIJ_genome_2977	Known_MAG	Bacteria	Fusobacteriota	Fusobacteriia	Fusobacteriales	Fusobacteriaceae	Fusobacterium_A
1040	KIJ_genome_2981	Known_MAG	Bacteria	Synergistota	Synergistia	Synergistales	Synergistaceae	Caccocola	Caccocola faecigallinarum
1041	KIJ_genome_3036	Known_MAG	Bacteria	Firmicutes_C	Negativicutes	Veillonellales	Veillonellaceae	Veillonella	Veillonella sp905214495
1042	KIJ_genome_3042	Known_MAG	Bacteria	Firmicutes_A	Clostridia	Oscillospirales	Acutalibacteraceae	Eubacterium_R	Eubacterium_R sp003526845
1043	KIJ_genome_3048	Known_MAG	Bacteria	Firmicutes_A	Clostridia	Monoglobales	Monoglobaceae	Monoglobus
1044	KIJ_genome_306	Known_MAG	Bacteria	Firmicutes_A	Clostridia	Oscillospirales	Ruminococcaceae	Gemmiger	Gemmiger qucibialis
1045	KIJ_genome_3060	Known_MAG	Bacteria	Bacteroidota	Bacteroidia	Bacteroidales	Marinifilaceae	Butyricimonas	Butyricimonas paravirosa
2107	MGYG000000779	Known_MAG	Bacteria	Bacteroidota	Bacteroidia	Bacteroidales	Bacteroidaceae	Prevotella	Prevotella sp000431975
1047	KIJ_genome_3100	Known_MAG	Bacteria	Firmicutes	Bacilli	Lactobacillales	Lactobacillaceae	Weissella	Weissella koreensis
1048	KIJ_genome_3137	Known_MAG	Bacteria	Firmicutes_A	Clostridia	Oscillospirales	Ruminococcaceae	Egerieicola
1049	KIJ_genome_3152	Known_MAG	Bacteria	Firmicutes_A	Clostridia	Peptostreptococcales	Anaerovoracaceae	Alangreenwoodia
1050	KIJ_genome_3154	Known_MAG	Bacteria	Firmicutes_A	Clostridia	Christensenellales	Borkfalkiaceae	Borkfalkia
1051	KIJ_genome_3156	Known_MAG	Bacteria	Firmicutes_A	Clostridia	Oscillospirales	Acutalibacteraceae	Eubacterium_R	Eubacterium_R faecale
1052	KIJ_genome_3227	Known_MAG	Bacteria	Firmicutes	Bacilli	Erysipelotrichales	Coprobacillaceae	Catenibacterium	Catenibacterium sp000437715
1053	KIJ_genome_3249	Known_MAG	Bacteria	Bacteroidota	Bacteroidia	Bacteroidales	Bacteroidaceae	Bacteroides	Bacteroides intestinalis
1013	KIJ_genome_28807	Known_MAG	Bacteria	Bacteroidota	Bacteroidia	Bacteroidales	Bacteroidaceae	Prevotella	Prevotella sp000433175
1055	KIJ_genome_3275	Known_MAG	Bacteria	Actinobacteriota	Coriobacteriia	Coriobacteriales	QAMH01	CACZQA01	CACZQA01 sp902783175
1056	KIJ_genome_3277	Known_MAG	Bacteria	Proteobacteria	Gammaproteobacteria	Enterobacterales	Succinivibrionaceae	Succinivibrio
1057	KIJ_genome_3314	Known_MAG	Bacteria	Bacteroidota	Bacteroidia	Bacteroidales	Rikenellaceae	Alistipes
1058	KIJ_genome_3364	Known_MAG	Bacteria	Firmicutes_A	Clostridia	Christensenellales	CAG-138	SFEL01	SFEL01 sp004557245
1059	KIJ_genome_3367	Known_MAG	Bacteria	Desulfobacterota_I	Desulfovibrionia	Desulfovibrionales	Desulfovibrionaceae	Mailhella	Mailhella sp900555975
1060	KIJ_genome_3400	Known_MAG	Bacteria	Firmicutes_A	Clostridia	Peptostreptococcales	Anaerovoracaceae	Copromorpha	Copromorpha excrementavium
1061	KIJ_genome_3402	Known_MAG	Bacteria	Firmicutes_A	Clostridia	Oscillospirales	Butyricicoccaceae	Agathobaculum	Agathobaculum butyriciproducens
1062	KIJ_genome_3403	Known_MAG	Bacteria	Firmicutes_C	Negativicutes	Selenomonadales	Selenomonadaceae	Megamonas	Megamonas funiformis
1063	KIJ_genome_3410	Known_MAG	Bacteria	Firmicutes_A	Clostridia	Lachnospirales	Lachnospiraceae	Egerieimonas
1064	KIJ_genome_3469	Known_MAG	Bacteria	Firmicutes_C	Negativicutes	Acidaminococcales	Acidaminococcaceae	Phascolarctobacterium_A	Phascolarctobacterium_A sp900544885
1065	KIJ_genome_3483	Known_MAG	Bacteria	Firmicutes_C	Negativicutes	Acidaminococcales	Acidaminococcaceae	Phascolarctobacterium_A	Phascolarctobacterium_A succinatutens
1066	KIJ_genome_3488	Known_MAG	Bacteria	Firmicutes_A	Clostridia	Lachnospirales	Lachnospiraceae	CAG-882	CAG-882 sp900545175
1067	KIJ_genome_3493	Known_MAG	Bacteria	Firmicutes_A	Clostridia	Oscillospirales	Butyricicoccaceae	Agathobaculum	Agathobaculum sp003481705
1068	KIJ_genome_3498	Known_MAG	Bacteria	Firmicutes_A	Clostridia	Oscillospirales	Ruminococcaceae	Anaerotruncus	Anaerotruncus colihominis
1069	KIJ_genome_3529	Known_MAG	Bacteria	Firmicutes_A	Clostridia	Oscillospirales	Oscillospiraceae	Dysosmobacter
1070	KIJ_genome_3537	Known_MAG	Bacteria	Firmicutes_C	Negativicutes	Veillonellales	Veillonellaceae	Veillonella	Veillonella nakazawae
1071	KIJ_genome_354	Known_MAG	Bacteria	Bacteroidota	Bacteroidia	Bacteroidales	Tannerellaceae	Parabacteroides	Parabacteroides johnsonii
1072	KIJ_genome_3642	Known_MAG	Bacteria	Firmicutes_A	Clostridia	Oscillospirales	Ruminococcaceae	Ruminiclostridium_E	Ruminiclostridium_E siraeum
1073	KIJ_genome_3652	Known_MAG	Bacteria	Firmicutes_A	Clostridia	Lachnospirales	Lachnospiraceae	Ruminococcus_B	Ruminococcus_B gnavus
1074	KIJ_genome_3657	Known_MAG	Bacteria	Firmicutes_A	Clostridia	Peptostreptococcales	Anaerovoracaceae	Alangreenwoodia	Alangreenwoodia sp905206455
1075	KIJ_genome_3687	Known_MAG	Bacteria	Firmicutes	Bacilli	RF39	UBA660	CAG-914	CAG-914 sp000437895
1076	KIJ_genome_372	Known_MAG	Bacteria	Firmicutes_A	Clostridia	Oscillospirales	Oscillospiraceae	Scatomorpha	Scatomorpha sp900546485
1077	KIJ_genome_3757	Known_MAG	Bacteria	Proteobacteria	Gammaproteobacteria	Enterobacterales	Pasteurellaceae	Haemophilus_D	Haemophilus_D parainfluenzae_K
1078	KIJ_genome_3793	Known_MAG	Bacteria	Firmicutes_A	Clostridia	Lachnospirales	Lachnospiraceae	Scatomonas	Scatomonas sp003481995
1079	KIJ_genome_3794	Known_MAG	Bacteria	Firmicutes_A	Clostridia	Christensenellales	CAG-314	Fimimonas	Fimimonas gallinarum
1080	KIJ_genome_3797	Known_MAG	Bacteria	Firmicutes_A	Clostridia	Oscillospirales	Acutalibacteraceae	UMGS1071	UMGS1071 sp900542375
1046	KIJ_genome_3076	Known_MAG	Bacteria	Bacteroidota	Bacteroidia	Bacteroidales	Bacteroidaceae	Prevotella	Prevotella sp000434975
1082	KIJ_genome_3807	Known_MAG	Bacteria	Firmicutes_A	Clostridia	Lachnospirales	Lachnospiraceae	Oribacterium	Oribacterium sp013394775
1083	KIJ_genome_3811	Known_MAG	Bacteria	Firmicutes_A	Clostridia	Oscillospirales	Oscillospiraceae	Faecousia
1084	KIJ_genome_382	Known_MAG	Bacteria	Firmicutes_A	Clostridia	Oscillospirales	Oscillospiraceae	Flavonifractor	Flavonifractor avistercoris
1085	KIJ_genome_3832	Known_MAG	Bacteria	Firmicutes_A	Clostridia	Lachnospirales	Lachnospiraceae	Ventrimonas	Ventrimonas sp900538475
1086	KIJ_genome_385	Known_MAG	Bacteria	Bacteroidota	Bacteroidia	Bacteroidales	Bacteroidaceae	Alloprevotella	Alloprevotella sp000318095
1087	KIJ_genome_3851	Known_MAG	Bacteria	Desulfobacterota_I	Desulfovibrionia	Desulfovibrionales	Desulfovibrionaceae	Bilophila	Bilophila sp900550745
1088	KIJ_genome_386	Known_MAG	Bacteria	Bacteroidota	Bacteroidia	Bacteroidales	Rikenellaceae	Alistipes	Alistipes putredinis
1089	KIJ_genome_3869	Known_MAG	Bacteria	Firmicutes_A	Clostridia	Oscillospirales	Ruminococcaceae	Negativibacillus	Negativibacillus massiliensis
1090	KIJ_genome_3885	Known_MAG	Bacteria	Firmicutes_A	Clostridia	Oscillospirales	Ruminococcaceae	Egerieicola	Egerieicola faecale
1091	KIJ_genome_3897	Known_MAG	Bacteria	Firmicutes_A	Clostridia	Lachnospirales	Anaerotignaceae	Anaerotignum	Anaerotignum faecicola
1092	KIJ_genome_3913	Known_MAG	Bacteria	Firmicutes	Bacilli	RF39	UBA660	UMGS995	UMGS995 sp900769695
1093	KIJ_genome_3916	Known_MAG	Bacteria	Firmicutes_C	Negativicutes	Veillonellales	Megasphaeraceae	Megasphaera
1094	KIJ_genome_3931	Known_MAG	Bacteria	Bacteroidota	Bacteroidia	Bacteroidales	Rikenellaceae	Alistipes	Alistipes avistercoris
1095	KIJ_genome_3947	Known_MAG	Bacteria	Firmicutes_A	Clostridia	Lachnospirales	Lachnospiraceae	Blautia	Blautia sp900539145
1096	KIJ_genome_3972	Known_MAG	Bacteria	Actinobacteriota	Actinomycetia	Actinomycetales	Actinomycetaceae	Pauljensenia	Pauljensenia sp018375675
1469	KR099A_Pre_refinedBins_bin.41	Malaysia_MAG	Bacteria	Bacteroidota	Bacteroidia	Bacteroidales	Bacteroidaceae	Prevotella	Prevotella sp000434975
1098	KIJ_genome_4	Known_MAG	Bacteria	Firmicutes_A	Clostridia	Oscillospirales	Ruminococcaceae	Faecalibacterium	Faecalibacterium prausnitzii
1099	KIJ_genome_4020	Known_MAG	Bacteria	Firmicutes_A	Clostridia	Oscillospirales	Ruminococcaceae	UBA1394	UBA1394 sp900538575
1100	KIJ_genome_4028	Known_MAG	Bacteria	Proteobacteria	Gammaproteobacteria	Enterobacterales	Pasteurellaceae	Haemophilus_D
2047	MGYG000000695	Known_MAG	Bacteria	Bacteroidota	Bacteroidia	Bacteroidales	Bacteroidaceae	Prevotella	Prevotella sp000436035
1102	KIJ_genome_4098	Known_MAG	Bacteria	Myxococcota	Bradymonadia	UBA4248	UBA4248	UBA4248	UBA4248 sp004554395
1103	KIJ_genome_4122	Known_MAG	Bacteria	Firmicutes_A	Clostridia	Oscillospirales	Acutalibacteraceae	UMGS1071	UMGS1071 sp900541905
1104	KIJ_genome_414	Known_MAG	Bacteria	Bacteroidota	Bacteroidia	Bacteroidales	UBA932	Cryptobacteroides	Cryptobacteroides sp900316045
1105	KIJ_genome_4146	Known_MAG	Bacteria	Actinobacteriota	Actinomycetia	Actinomycetales	Actinomycetaceae	Pauljensenia	Pauljensenia bouchesdurhonensis
1106	KIJ_genome_4172	Known_MAG	Bacteria	Bacteroidota	Bacteroidia	Bacteroidales	Muribaculaceae	CAG-1031	CAG-1031 sp000431215
1107	KIJ_genome_4179	Known_MAG	Bacteria	Firmicutes	Bacilli	RF39	UBA660	CAG-302	CAG-302 sp900543825
1108	KIJ_genome_4182	Known_MAG	Bacteria	Bacteroidota	Bacteroidia	Bacteroidales	Bacteroidaceae	Bacteroides	Bacteroides sp900762525
1109	KIJ_genome_4229	Known_MAG	Bacteria	Proteobacteria	Gammaproteobacteria	Enterobacterales	Pasteurellaceae	Haemophilus_D	Haemophilus_D sp900755445
1110	KIJ_genome_423	Known_MAG	Bacteria	Firmicutes_A	Clostridia	Lachnospirales	Lachnospiraceae	Roseburia	Roseburia inulinivorans
1111	KIJ_genome_4239	Known_MAG	Bacteria	Firmicutes_A	Clostridia	Oscillospirales	Acutalibacteraceae	Ruminococcus_E	Ruminococcus_E bromii_B
1112	KIJ_genome_4268	Known_MAG	Bacteria	Firmicutes_A	Clostridia	Oscillospirales	Acutalibacteraceae	UMGS1474
1113	KIJ_genome_4275	Known_MAG	Bacteria	Bacteroidota	Bacteroidia	Bacteroidales	Porphyromonadaceae	Porphyromonas	Porphyromonas sp900539765
1114	KIJ_genome_4282	Known_MAG	Bacteria	Firmicutes	Bacilli	Erysipelotrichales	Coprobacillaceae	Faecalibacillus	Faecalibacillus intestinalis
1115	KIJ_genome_436	Known_MAG	Bacteria	Proteobacteria	Gammaproteobacteria	Burkholderiales	Burkholderiaceae	Duodenibacillus
1116	KIJ_genome_4476	Known_MAG	Bacteria	Firmicutes_A	Clostridia	Oscillospirales	Ruminococcaceae	UBA866	UBA866 sp904384225
1117	KIJ_genome_4549	Known_MAG	Bacteria	Firmicutes_A	Clostridia	Oscillospirales	Ruminococcaceae	Pygmaiobacter
1118	KIJ_genome_4575	Known_MAG	Bacteria	Firmicutes_A	Clostridia	Lachnospirales	Lachnospiraceae	Bacteroides_F	Bacteroides_F pectinophilus
1119	KIJ_genome_4594	Known_MAG	Bacteria	Firmicutes	Bacilli	RF39	UBA660	CAG-533	CAG-533 sp000434495
1120	KIJ_genome_4690	Known_MAG	Bacteria	Verrucomicrobiota	Lentisphaeria	Victivallales	Victivallaceae	Victivallis	Victivallis lenta
1121	KIJ_genome_4739	Known_MAG	Bacteria	Firmicutes_A	Clostridia	Peptostreptococcales	Anaerovoracaceae	Alangreenwoodia	Alangreenwoodia sp905206455
1122	KIJ_genome_4757	Known_MAG	Bacteria	Bacteroidota	Bacteroidia	Bacteroidales	Barnesiellaceae	Barnesiella_A	Barnesiella_A excrementipullorum
1123	KIJ_genome_4761	Known_MAG	Bacteria	Firmicutes_A	Clostridia	Lachnospirales	Lachnospiraceae	Anaerosporobacter
1124	KIJ_genome_4808	Known_MAG	Bacteria	Firmicutes_A	Clostridia	Lachnospirales	Lachnospiraceae	CAG-303
1125	KIJ_genome_4822	Known_MAG	Bacteria	Firmicutes_A	Clostridia	Lachnospirales	Lachnospiraceae	Enterocloster	Enterocloster sp005845215
1126	KIJ_genome_4840	Known_MAG	Bacteria	Firmicutes_A	Clostridia	Oscillospirales	Oscillospiraceae	Flavonifractor	Flavonifractor plautii
1127	KIJ_genome_4872	Known_MAG	Bacteria	Firmicutes_A	Clostridia	Christensenellales	Borkfalkiaceae	Borkfalkia	Borkfalkia sp904374385
1128	KIJ_genome_4895	Known_MAG	Bacteria	Firmicutes_A	Clostridia	Oscillospirales	Ruminococcaceae	Negativibacillus	Negativibacillus faecipullorum
1129	KIJ_genome_490	Known_MAG	Bacteria	Firmicutes	Bacilli	Erysipelotrichales	Erysipelotrichaceae	Longicatena	Longicatena caecimuris
1130	KIJ_genome_4903	Known_MAG	Bacteria	Firmicutes_A	Clostridia	Lachnospirales	Lachnospiraceae	CAG-882	CAG-882 sp000435595
1131	KIJ_genome_494	Known_MAG	Bacteria	Firmicutes_A	Clostridia	Lachnospirales	Lachnospiraceae	Frisingicoccus	Frisingicoccus caecimuris
1132	KIJ_genome_4959	Known_MAG	Bacteria	Firmicutes_A	Clostridia	Oscillospirales	Ruminococcaceae	Ruminococcus_D	Ruminococcus_D sp900752625
1133	KIJ_genome_4964	Known_MAG	Bacteria	Firmicutes_A	Clostridia	Peptostreptococcales	Anaerovoracaceae	CAG-238	CAG-238 sp900542245
1134	KIJ_genome_4966	Known_MAG	Bacteria	Bacteroidota	Bacteroidia	Bacteroidales	Muribaculaceae	CAG-873	CAG-873 sp900759825
1135	KIJ_genome_497	Known_MAG	Bacteria	Bacteroidota	Bacteroidia	Bacteroidales	Rikenellaceae	Alistipes	Alistipes putredinis
1136	KIJ_genome_4986	Known_MAG	Bacteria	Firmicutes_A	Clostridia	Peptostreptococcales	Peptostreptococcaceae	Peptostreptococcus	Peptostreptococcus stomatis
1137	KIJ_genome_4992	Known_MAG	Bacteria	Firmicutes_A	Clostridia	Christensenellales
1138	KIJ_genome_5004	Known_MAG	Bacteria	Firmicutes_A	Clostridia	Lachnospirales	Lachnospiraceae	Butyribacter	Butyribacter intestini
1139	KIJ_genome_5017	Known_MAG	Bacteria	Proteobacteria	Gammaproteobacteria	Burkholderiales	Burkholderiaceae	Sutterella	Sutterella faecalis
1140	KIJ_genome_5024	Known_MAG	Bacteria	Actinobacteriota	Coriobacteriia	Coriobacteriales	Eggerthellaceae	Ellagibacter	Ellagibacter isourolithinifaciens
1141	KIJ_genome_5045	Known_MAG	Bacteria	Firmicutes_A	Clostridia	TANB77	CAG-508	CAG-492
1142	KIJ_genome_5091	Known_MAG	Bacteria	Bacteroidota	Bacteroidia	Bacteroidales	Marinifilaceae	Butyricimonas	Butyricimonas sp900184685
1143	KIJ_genome_5192	Known_MAG	Bacteria	Firmicutes_A	Clostridia	Oscillospirales	Acutalibacteraceae	Pseudoruminococcus_A	Pseudoruminococcus_A massiliensis
1144	KIJ_genome_5198	Known_MAG	Bacteria	Firmicutes	Bacilli	RFN20	CAG-288	Enterosoma	Enterosoma sp900549915
1145	KIJ_genome_52	Known_MAG	Bacteria	Firmicutes	Bacilli	Lactobacillales	Streptococcaceae	Streptococcus
1146	KIJ_genome_5201	Known_MAG	Bacteria	Firmicutes_B	Peptococcia	Peptococcales	Peptococcaceae	QAKL01	QAKL01 sp003343815
1147	KIJ_genome_5205	Known_MAG	Bacteria	Proteobacteria	Gammaproteobacteria	Enterobacterales	Enterobacteriaceae	Klebsiella	Klebsiella ornithinolytica
1148	KIJ_genome_5213	Known_MAG	Bacteria	Firmicutes_A	Clostridia	TANB77	CAG-508	CAG-269	CAG-269 sp001916055
1149	KIJ_genome_522	Known_MAG	Bacteria	Campylobacterota	Campylobacteria	Campylobacterales	Campylobacteraceae	Campylobacter_A	Campylobacter_A concisus_T
1150	KIJ_genome_5234	Known_MAG	Bacteria	Proteobacteria	Gammaproteobacteria	Enterobacterales	Succinivibrionaceae	Succinatimonas	Succinatimonas hippei
1151	KIJ_genome_5337	Known_MAG	Bacteria	Firmicutes_A	Clostridia	Lachnospirales	Lachnospiraceae	CAG-603	CAG-603 sp900066105
1152	KIJ_genome_5343	Known_MAG	Bacteria	Firmicutes	Bacilli	Erysipelotrichales	Coprobacillaceae	Massiliomicrobiota	Massiliomicrobiota merdigallinarum
1153	KIJ_genome_5377	Known_MAG	Bacteria	Firmicutes_A	Clostridia	Lachnospirales	Lachnospiraceae	JAGTTR01	JAGTTR01 sp018223385
1154	KIJ_genome_5378	Known_MAG	Bacteria	Firmicutes_A	Clostridia	Oscillospirales	Ruminococcaceae	Anaerotruncus	Anaerotruncus colihominis
1155	KIJ_genome_5389	Known_MAG	Bacteria	Firmicutes_A	Clostridia	Oscillospirales	Acutalibacteraceae	CAG-217	CAG-217 sp000436335
1156	KIJ_genome_5392	Known_MAG	Bacteria	Firmicutes	Bacilli	RFN20	CAG-826	Onthovivens
1157	KIJ_genome_540	Known_MAG	Bacteria	Firmicutes_A	Clostridia	Oscillospirales	Oscillospiraceae	CAG-170	CAG-170 sp000436735
1158	KIJ_genome_5426	Known_MAG	Bacteria	Firmicutes_A	Clostridia	Oscillospirales	Oscillospiraceae	HGM13010
1159	KIJ_genome_5427	Known_MAG	Bacteria	Firmicutes_C	Negativicutes	Acidaminococcales	Acidaminococcaceae	Acidaminococcus
1160	KIJ_genome_545	Known_MAG	Bacteria	Firmicutes_A	Clostridia	Oscillospirales	Acutalibacteraceae
1161	KIJ_genome_5458	Known_MAG	Bacteria	Actinobacteriota	Coriobacteriia	Coriobacteriales	Coriobacteriaceae	Collinsella
1162	KIJ_genome_5476	Known_MAG	Bacteria	Firmicutes_A	Clostridia	Oscillospirales	Ruminococcaceae	Gemmiger	Gemmiger formicilis_A
1163	KIJ_genome_548	Known_MAG	Bacteria	Bacteroidota	Bacteroidia	Bacteroidales	Rikenellaceae	Alistipes	Alistipes finegoldii
1164	KIJ_genome_5491	Known_MAG	Bacteria	Firmicutes_A	Clostridia	Oscillospirales	Oscillospiraceae	Dysosmobacter	Dysosmobacter welbionis
1165	KIJ_genome_5521	Known_MAG	Bacteria	Firmicutes	Bacilli	RF39	UBA660	Onthocola_B	Onthocola_B sp000438075
1166	KIJ_genome_5533	Known_MAG	Bacteria	Firmicutes_A	Clostridia	Oscillospirales	Oscillospiraceae	CAG-83	CAG-83 sp900552475
1167	KIJ_genome_554	Known_MAG	Bacteria	Actinobacteriota	Coriobacteriia	Coriobacteriales	Eggerthellaceae	Adlercreutzia	Adlercreutzia equolifaciens
1168	KIJ_genome_559	Known_MAG	Bacteria	Firmicutes_A	Clostridia	Oscillospirales	Oscillospiraceae	ER4	ER4 sp000765235
1169	KIJ_genome_5603	Known_MAG	Bacteria	Firmicutes_A	Clostridia	Oscillospirales	Ruminococcaceae	Gemmiger	Gemmiger formicilis
1170	KIJ_genome_5607	Known_MAG	Bacteria	Firmicutes_B	Peptococcia	Peptococcales	Peptococcaceae	UMGS1590
1171	KIJ_genome_5617	Known_MAG	Bacteria	Proteobacteria	Gammaproteobacteria	Burkholderiales	Neisseriaceae	Neisseria	Neisseria flavescens_B
1172	KIJ_genome_5622	Known_MAG	Bacteria	Synergistota	Synergistia	Synergistales	Synergistaceae	Cloacibacillus	Cloacibacillus evryensis
1173	KIJ_genome_5623	Known_MAG	Bacteria	Firmicutes_A	Clostridia	Oscillospirales	Acutalibacteraceae	Limousia	Limousia pullorum
1174	KIJ_genome_5628	Known_MAG	Bacteria	Firmicutes_A	Clostridia	Lachnospirales	Lachnospiraceae	Anaerostipes
1175	KIJ_genome_5651	Known_MAG	Bacteria	Bacteroidota	Bacteroidia	Bacteroidales	Tannerellaceae	Parabacteroides
1176	KIJ_genome_5666	Known_MAG	Bacteria	Firmicutes_A	Clostridia	Oscillospirales	Acutalibacteraceae	Ruminococcus_E	Ruminococcus_E sp003526955
1177	KIJ_genome_5688	Known_MAG	Bacteria	Proteobacteria	Gammaproteobacteria	Enterobacterales	Enterobacteriaceae	Escherichia	Escherichia coli
1178	KIJ_genome_5695	Known_MAG	Bacteria	Firmicutes_A	Clostridia	Peptostreptococcales	Peptostreptococcaceae	Intestinibacter	Intestinibacter bartlettii
1179	KIJ_genome_57	Known_MAG	Bacteria	Firmicutes_A	Clostridia	TANB77	CAG-508	CAG-492	CAG-492 sp000434335
1180	KIJ_genome_5724	Known_MAG	Bacteria	Firmicutes_A	Clostridia	Christensenellales	Christensenellaceae	Christensenella	Christensenella massiliensis
1181	KIJ_genome_5741	Known_MAG	Bacteria	Firmicutes_A	Clostridia	Lachnospirales	Lachnospiraceae	Mediterraneibacter	Mediterraneibacter merdigallinarum
1182	KIJ_genome_5753	Known_MAG	Bacteria	Firmicutes_C	Negativicutes	Veillonellales	Dialisteraceae	Dialister	Dialister sp000434475
1183	KIJ_genome_5863	Known_MAG	Bacteria	Firmicutes_A	Clostridia	Lachnospirales	Cellulosilyticaceae	Niameybacter	Niameybacter stercoravium
1184	KIJ_genome_5882	Known_MAG	Bacteria	Firmicutes_A	Clostridia	UMGS1810	UMGS1810	RGIG4708
1185	KIJ_genome_5900	Known_MAG	Bacteria	Bacteroidota	Bacteroidia	Bacteroidales	UBA11471	UBA11471
1186	KIJ_genome_5921	Known_MAG	Bacteria	Firmicutes_A	Clostridia	Oscillospirales	Butyricicoccaceae	Pseudobutyricicoccus	Pseudobutyricicoccus sp003477405
1187	KIJ_genome_593	Known_MAG	Bacteria	Firmicutes_A	Clostridia	Oscillospirales	Oscillospiraceae	Lawsonibacter	Lawsonibacter asaccharolyticus
1188	KIJ_genome_5946	Known_MAG	Bacteria	Firmicutes_A	Clostridia	Oscillospirales	Ruminococcaceae	Negativibacillus
1189	KIJ_genome_6007	Known_MAG	Bacteria	Bacteroidota	Bacteroidia	Bacteroidales	Porphyromonadaceae	Porphyromonas	Porphyromonas sp900548415
1190	KIJ_genome_6052	Known_MAG	Bacteria	Firmicutes_A	Clostridia	Lachnospirales	Lachnospiraceae	Roseburia
1191	KIJ_genome_6060	Known_MAG	Bacteria	Firmicutes_B	Peptococcia	Peptococcales	Peptococcaceae	QAKL01	QAKL01 sp003343815
1192	KIJ_genome_6087	Known_MAG	Bacteria	Firmicutes_A	Clostridia	Oscillospirales	Acutalibacteraceae	Heritagella	Heritagella sp905200265
1193	KIJ_genome_6123	Known_MAG	Bacteria	Firmicutes_A	Clostridia	Lachnospirales	Anaerotignaceae	Neoanaerotignum_A
1194	KIJ_genome_6137	Known_MAG	Bacteria	Actinobacteriota	Coriobacteriia	Coriobacteriales	Coriobacteriaceae	Collinsella	Collinsella sp900541695
1195	KIJ_genome_6200	Known_MAG	Bacteria	Bacteroidota	Bacteroidia	Bacteroidales	Bacteroidaceae	Bacteroides	Bacteroides faecalis
1196	KIJ_genome_6211	Known_MAG	Bacteria	Firmicutes	Bacilli	RF39	UBA660	RUG11198
1197	KIJ_genome_6263	Known_MAG	Bacteria	Bacteroidota	Bacteroidia	Bacteroidales	Tannerellaceae	Parabacteroides	Parabacteroides faecavium
1198	KIJ_genome_6295	Known_MAG	Bacteria	Firmicutes_A	Clostridia	Lachnospirales	Lachnospiraceae	AM51-8	AM51-8 sp900546435
1199	KIJ_genome_6298	Known_MAG	Bacteria	Firmicutes_A	Clostridia	Christensenellales	CAG-74	Faecivicinus	Faecivicinus sp900759005
1200	KIJ_genome_63	Known_MAG	Bacteria	Bacteroidota	Bacteroidia	Bacteroidales	Bacteroidaceae	Phocaeicola	Phocaeicola sp000434735
1201	KIJ_genome_6317	Known_MAG	Bacteria	Firmicutes_A	Clostridia	Oscillospirales	Ruminococcaceae	Ruminococcus_D	Ruminococcus_D bicirculans
1202	KIJ_genome_6346	Known_MAG	Bacteria	Firmicutes_A	Clostridia	Christensenellales	CAG-552	UBA10677	UBA10677 sp900543755
1203	KIJ_genome_6350	Known_MAG	Bacteria	Firmicutes_C	Negativicutes	Acidaminococcales	Acidaminococcaceae	Acidaminococcus	Acidaminococcus provencensis
1204	KIJ_genome_637	Known_MAG	Bacteria	Firmicutes_A	Clostridia	Lachnospirales	Lachnospiraceae	CAG-590	CAG-590 sp000431135
1205	KIJ_genome_6381	Known_MAG	Bacteria	Firmicutes_A	Clostridia	Oscillospirales	Acutalibacteraceae	Pseudoruminococcus_A	Pseudoruminococcus_A massiliensis
2263	MGYG000001042	Known_MAG	Bacteria	Bacteroidota	Bacteroidia	Bacteroidales	Bacteroidaceae	Prevotella	Prevotella sp000436595
1207	KIJ_genome_6395	Known_MAG	Bacteria	Firmicutes_A	Clostridia	Christensenellales	Borkfalkiaceae	Scatosoma	Scatosoma sp003150575
1208	KIJ_genome_6400	Known_MAG	Bacteria	Firmicutes_C	Negativicutes	Veillonellales	Megasphaeraceae	Megasphaera	Megasphaera sp002319965
1209	KIJ_genome_6405	Known_MAG	Bacteria	Firmicutes	Bacilli	Lactobacillales	Streptococcaceae	Streptococcus	Streptococcus thermophilus
1210	KIJ_genome_6418	Known_MAG	Bacteria	Actinobacteriota	Coriobacteriia	Coriobacteriales	Atopobiaceae	NM07-P-09	NM07-P-09 sp012584445
1211	KIJ_genome_6446	Known_MAG	Bacteria	Firmicutes_A	Clostridia	Peptostreptococcales	Anaerovoracaceae	BX12
1212	KIJ_genome_6456	Known_MAG	Bacteria	Proteobacteria	Gammaproteobacteria	Burkholderiales	Burkholderiaceae	Mesosutterella	Mesosutterella multiformis
1213	KIJ_genome_6467	Known_MAG	Bacteria	Proteobacteria	Gammaproteobacteria	Enterobacterales	Pasteurellaceae	Haemophilus_D	Haemophilus_D sp900755445
1214	KIJ_genome_6498	Known_MAG	Bacteria	Firmicutes_A	Clostridia	Lachnospirales	Lachnospiraceae	Enterocloster	Enterocloster sp900543885
1215	KIJ_genome_6539	Known_MAG	Bacteria	Firmicutes_A	Clostridia	Lachnospirales	Lachnospiraceae	Lachnospira	Lachnospira eligens_A
1216	KIJ_genome_654	Known_MAG	Bacteria	Firmicutes_A	Clostridia	Oscillospirales	Acutalibacteraceae	UBA737	UBA737 sp900549755
1217	KIJ_genome_6550	Known_MAG	Bacteria	Firmicutes_A	Clostridia	Peptostreptococcales	Anaerovoracaceae	Copromorpha	Copromorpha sp900066305
1218	KIJ_genome_6555	Known_MAG	Bacteria	Firmicutes_A	Clostridia	Lachnospirales	Lachnospiraceae	Sellimonas	Sellimonas intestinalis
1219	KIJ_genome_6572	Known_MAG	Bacteria	Actinobacteriota	Coriobacteriia	Coriobacteriales	Eggerthellaceae	Slackia_A	Slackia_A isoflavoniconvertens
1220	KIJ_genome_66	Known_MAG	Bacteria	Firmicutes_A	Clostridia	Oscillospirales	CAG-272	UMGS1865	UMGS1865 sp900547725
1221	KIJ_genome_6639	Known_MAG	Bacteria	Firmicutes_A	Clostridia	Oscillospirales	Oscillospiraceae	Limivicinus
1222	KIJ_genome_6714	Known_MAG	Bacteria	Bacteroidota	Bacteroidia	Bacteroidales	Rikenellaceae	Alistipes_A	Alistipes_A pullistercoris
4946	MGYG000004698	Known_MAG	Bacteria	Bacteroidota	Bacteroidia	Bacteroidales	Bacteroidaceae	Prevotella	Prevotella sp000436695
1224	KIJ_genome_6738	Known_MAG	Bacteria	Firmicutes_A	Clostridia	Christensenellales	CAG-74	Limiplasma	Limiplasma pullistercoris
1225	KIJ_genome_6759	Known_MAG	Bacteria	Firmicutes_A	Clostridia	Lachnospirales	Lachnospiraceae	Caccovicinus	Caccovicinus sp017889125
1226	KIJ_genome_6766	Known_MAG	Bacteria	Firmicutes_A	Clostridia	Christensenellales	MARSEILLE-P3954	RGIG9107
1227	KIJ_genome_6772	Known_MAG	Bacteria	Firmicutes_C	Negativicutes	Veillonellales	Megasphaeraceae	Megasphaera	Megasphaera elsdenii
1228	KIJ_genome_6881	Known_MAG	Bacteria	Firmicutes_A	Clostridia	Oscillospirales	Ruminococcaceae	Ruminococcus_C
5270	SJ095B_Post1_refinedBins_bin.73	Known_MAG	Bacteria	Bacteroidota	Bacteroidia	Bacteroidales	Bacteroidaceae	Prevotella	Prevotella sp000436915
1230	KIJ_genome_6925	Known_MAG	Bacteria	Firmicutes_A	Clostridia	Lachnospirales	Lachnospiraceae	Eubacterium_F	Eubacterium_F sp003491505
1231	KIJ_genome_6941	Known_MAG	Bacteria	Firmicutes	Bacilli	Lactobacillales	Streptococcaceae	Streptococcus	Streptococcus anginosus
1232	KIJ_genome_6954	Known_MAG	Bacteria	Firmicutes	Bacilli	Erysipelotrichales	Coprobacillaceae	Massiliomicrobiota	Massiliomicrobiota merdigallinarum
1233	KIJ_genome_6979	Known_MAG	Bacteria	Firmicutes_A	Clostridia	Lachnospirales	Lachnospiraceae	CAG-127	CAG-127 sp900319515
1234	KIJ_genome_698	Known_MAG	Bacteria	Firmicutes_A	Clostridia	Oscillospirales	Oscillospiraceae	Lawsonibacter	Lawsonibacter sp900553135
1235	KIJ_genome_7	Known_MAG	Bacteria	Firmicutes_A	Clostridia	Lachnospirales	Lachnospiraceae	Blautia_A	Blautia_A sp900549015
1236	KIJ_genome_7032	Known_MAG	Bacteria	Actinobacteriota	Coriobacteriia	Coriobacteriales	Eggerthellaceae	CAG-1427	CAG-1427 sp000435675
1237	KIJ_genome_7060	Known_MAG	Bacteria	Firmicutes_A	Clostridia	Monoglobales	Monoglobaceae	Monoglobus	Monoglobus pectinilyticus
1238	KIJ_genome_7090	Known_MAG	Bacteria	Firmicutes_A	Clostridia	Oscillospirales	Ruminococcaceae	Ruthenibacterium	Ruthenibacterium lactatiformans
1239	KIJ_genome_7105	Known_MAG	Bacteria	Actinobacteriota	Actinomycetia	Actinomycetales	Actinomycetaceae	Pauljensenia	Pauljensenia sp001838165
1240	KIJ_genome_7112	Known_MAG	Bacteria	Firmicutes	Bacilli	ML615J-28	CAG-313	CAG-313	CAG-313 sp000433035
1241	KIJ_genome_7118	Known_MAG	Bacteria	Proteobacteria	Gammaproteobacteria	Burkholderiales	Burkholderiaceae	Sutterella
1242	KIJ_genome_7133	Known_MAG	Bacteria	Firmicutes_A	Clostridia	Lachnospirales	Lachnospiraceae	Agathobacter	Agathobacter rectalis
1243	KIJ_genome_718	Known_MAG	Bacteria	Fusobacteriota	Fusobacteriia	Fusobacteriales	Fusobacteriaceae	Fusobacterium_A	Fusobacterium_A mortiferum
1244	KIJ_genome_7202	Known_MAG	Bacteria	Firmicutes_A	Clostridia	Peptostreptococcales	Anaerovoracaceae	Copromorpha
1245	KIJ_genome_7232	Known_MAG	Bacteria	Firmicutes_A	Clostridia	Oscillospirales	Butyricicoccaceae	Butyricicoccus	Butyricicoccus sp018383195
1246	KIJ_genome_7245	Known_MAG	Bacteria	Firmicutes_A	Clostridia	Oscillospirales	Ruminococcaceae	Ruthenibacterium	Ruthenibacterium merdipullorum
1247	KIJ_genome_726	Known_MAG	Bacteria	Firmicutes_A	Clostridia	Lachnospirales	Lachnospiraceae	Eubacterium_F	Eubacterium_F sp900539115
1248	KIJ_genome_7261	Known_MAG	Bacteria	Firmicutes_A	Clostridia	Clostridiales	Clostridiaceae	Clostridium	Clostridium saudiense
1249	KIJ_genome_7265	Known_MAG	Bacteria	Firmicutes_A	Clostridia	Christensenellales	CAG-138	UMGS946	UMGS946 sp900544965
1250	KIJ_genome_7286	Known_MAG	Bacteria	Firmicutes_A	Clostridia	Christensenellales	CAG-74	Egerieenecus	Egerieenecus sp900553315
1251	KIJ_genome_729	Known_MAG	Bacteria	Firmicutes	Bacilli	RF39	UBA660	CAG-417	CAG-417 sp000432835
1252	KIJ_genome_731	Known_MAG	Bacteria	Firmicutes_C	Negativicutes	Acidaminococcales	Acidaminococcaceae	Phascolarctobacterium	Phascolarctobacterium faecium
1253	KIJ_genome_7336	Known_MAG	Bacteria	Firmicutes_A	Clostridia	Christensenellales	CAG-138	Pelethousia	Pelethousia gallinarum
1254	KIJ_genome_7363	Known_MAG	Bacteria	Bacteroidota	Bacteroidia	Bacteroidales	Bacteroidaceae	Bacteroides
1255	KIJ_genome_7374	Known_MAG	Bacteria	Firmicutes_A	Clostridia	Lachnospirales	Lachnospiraceae	Clostridium_Q	Clostridium_Q sp000435655
1256	KIJ_genome_7375	Known_MAG	Bacteria	Firmicutes_A	Clostridia	Oscillospirales	Acutalibacteraceae	Anaeromassilibacillus	Anaeromassilibacillus sp001305115
1257	KIJ_genome_7407	Known_MAG	Bacteria	Synergistota	Synergistia	Synergistales	Synergistaceae	Cloacibacillus	Cloacibacillus evryensis
1258	KIJ_genome_7480	Known_MAG	Bacteria	Firmicutes_A	Clostridia	Oscillospirales	Ruminococcaceae	UBA5884	UBA5884 sp900551505
1259	KIJ_genome_7487	Known_MAG	Bacteria	Firmicutes	Bacilli	RF39	UBA660	UBA6448	UBA6448 sp000437315
1260	KIJ_genome_7488	Known_MAG	Bacteria	Firmicutes	Bacilli	Erysipelotrichales	Erysipelotrichaceae	Faecalibaculum	Faecalibaculum rodentium
1261	KIJ_genome_7525	Known_MAG	Bacteria	Firmicutes_A	Clostridia	Oscillospirales	Ruminococcaceae	Angelakisella
1262	KIJ_genome_7527	Known_MAG	Bacteria	Firmicutes_A	Clostridia	Lachnospirales	CAG-274	CAG-274	CAG-274 sp900545305
1263	KIJ_genome_7581	Known_MAG	Bacteria	Actinobacteriota	Coriobacteriia	Coriobacteriales	Eggerthellaceae	Raoultibacter	Raoultibacter timonensis
1264	KIJ_genome_761	Known_MAG	Bacteria	Firmicutes_A	Clostridia	Christensenellales	Christensenellaceae	QANA01
1265	KIJ_genome_7687	Known_MAG	Bacteria	Firmicutes_A	Clostridia	Lachnospirales	Lachnospiraceae	Choladousia	Choladousia sp902363665
1266	KIJ_genome_7722	Known_MAG	Bacteria	Firmicutes_A	Clostridia	Lachnospirales	Lachnospiraceae	Eubacterium_I	Eubacterium_I avistercoris
1267	KIJ_genome_7725	Known_MAG	Bacteria	Proteobacteria	Gammaproteobacteria	Enterobacterales	Enterobacteriaceae	Escherichia	Escherichia coli
1268	KIJ_genome_7733	Known_MAG	Bacteria	Firmicutes_A	Clostridia	Christensenellales	CAG-74	SFTH01
3415	MGYG000002653	Known_MAG	Bacteria	Bacteroidota	Bacteroidia	Bacteroidales	Bacteroidaceae	Prevotella	Prevotella sp002251295
1270	KIJ_genome_7764	Known_MAG	Bacteria	Firmicutes_A	Clostridia	Oscillospirales	Butyricicoccaceae	Butyricicoccus	Butyricicoccus pullicaecorum
1271	KIJ_genome_7766	Known_MAG	Bacteria	Firmicutes_A	Clostridia	Christensenellales	CAG-138	Aphodomorpha	Aphodomorpha sp900549955
1272	KIJ_genome_7784	Known_MAG	Bacteria	Firmicutes_A	Clostridia	Oscillospirales	Ruminococcaceae	Ruminococcus	Ruminococcus sp002362135
1273	KIJ_genome_7824	Known_MAG	Bacteria	Firmicutes_C	Negativicutes	Veillonellales	Veillonellaceae	Veillonella	Veillonella parvula
1274	KIJ_genome_7859	Known_MAG	Bacteria	Firmicutes_A	Clostridia	Oscillospirales	Oscillospiraceae	Enterenecus	Enterenecus faecium
1275	KIJ_genome_7872	Known_MAG	Bacteria	Firmicutes_A	Clostridia	Lachnospirales	Lachnospiraceae	Pseudolachnospira
1276	KIJ_genome_7902	Known_MAG	Bacteria	Firmicutes_C	Negativicutes	Veillonellales	Dialisteraceae	Dialister	Dialister sp000434475
1277	KIJ_genome_7905	Known_MAG	Bacteria	Firmicutes_A	Clostridia	Oscillospirales	Oscillospiraceae	ER4	ER4 sp000765235
1278	KIJ_genome_7924	Known_MAG	Bacteria	Bacteroidota	Bacteroidia	Bacteroidales	Bacteroidaceae	Paraprevotella
1279	KIJ_genome_7930	Known_MAG	Bacteria	Bacteroidota	Bacteroidia	Bacteroidales	Bacteroidaceae	Bacteroides	Bacteroides thetaiotaomicron
1280	KIJ_genome_7943	Known_MAG	Bacteria	Proteobacteria	Gammaproteobacteria	Enterobacterales	Enterobacteriaceae	Escherichia	Escherichia coli
1281	KIJ_genome_7947	Known_MAG	Bacteria	Firmicutes_A	Clostridia	Oscillospirales	Oscillospiraceae	Faecousia	Faecousia sp900549705
1282	KIJ_genome_7952	Known_MAG	Bacteria	Firmicutes_A	Clostridia	UBA1381	UBA1381	CAG-41	CAG-41 sp900066215
1283	KIJ_genome_7981	Known_MAG	Bacteria	Firmicutes_A	Clostridia	Clostridiales	Clostridiaceae	Clostridium	Clostridium saudiense
1284	KIJ_genome_7993	Known_MAG	Bacteria	Firmicutes	Bacilli	RF39	UBA660	CAG-302	CAG-302 sp001916775
1285	KIJ_genome_7995	Known_MAG	Bacteria	Synergistota	Synergistia	Synergistales	Synergistaceae	Cloacibacillus	Cloacibacillus evryensis
1286	KIJ_genome_8005	Known_MAG	Bacteria	Proteobacteria	Gammaproteobacteria	Enterobacterales	Enterobacteriaceae	Citrobacter	Citrobacter braakii
1287	KIJ_genome_8015	Known_MAG	Bacteria	Firmicutes_A	Clostridia	Christensenellales	CAG-74	Pullichristensenella	Pullichristensenella stercoripullorum
1288	KIJ_genome_8016	Known_MAG	Bacteria	Firmicutes_A	Clostridia	Oscillospirales	CAG-272	CAG-448	CAG-448 sp003150135
1289	KIJ_genome_8028	Known_MAG	Bacteria	Firmicutes_A	Clostridia	Oscillospirales	Ruminococcaceae	Faecalibacterium	Faecalibacterium prausnitzii_C
1290	KIJ_genome_8040	Known_MAG	Bacteria	Firmicutes_A	Clostridia	Oscillospirales	Acutalibacteraceae	Ruminococcus_E	Ruminococcus_E bromii_B
1291	KIJ_genome_8054	Known_MAG	Bacteria	Bacteroidota	Bacteroidia	Bacteroidales	Muribaculaceae	UBA7173	UBA7173 sp900545955
1292	KIJ_genome_808	Known_MAG	Bacteria	Actinobacteriota	Coriobacteriia	Coriobacteriales	Eggerthellaceae	Eggerthella	Eggerthella lenta
1293	KIJ_genome_8118	Known_MAG	Bacteria	Bacteroidota	Bacteroidia	Bacteroidales	Marinifilaceae	Butyricimonas	Butyricimonas virosa
1294	KIJ_genome_8153	Known_MAG	Bacteria	Elusimicrobiota	Elusimicrobia	Elusimicrobiales	Elusimicrobiaceae	UBA1436	UBA1436 sp900541355
1295	KIJ_genome_8167	Known_MAG	Bacteria	Firmicutes_A	Clostridia	Oscillospirales	Acutalibacteraceae	Eubacterium_R
1296	KIJ_genome_8195	Known_MAG	Bacteria	Actinobacteriota	Coriobacteriia	Coriobacteriales	Eggerthellaceae	CAG-1427	CAG-1427 sp000436075
1297	KIJ_genome_8220	Known_MAG	Bacteria	Firmicutes_A	Clostridia	Oscillospirales	Ruminococcaceae	Angelakisella	Angelakisella sp900547385
1298	KIJ_genome_8250	Known_MAG	Bacteria	Firmicutes_A	Clostridia	Lachnospirales	Lachnospiraceae	Lachnospira
1299	KIJ_genome_8260	Known_MAG	Bacteria	Bacteroidota	Bacteroidia	Bacteroidales	Rikenellaceae	Alistipes_A
1300	KIJ_genome_8261	Known_MAG	Bacteria	Campylobacterota	Campylobacteria	Campylobacterales	Helicobacteraceae	Helicobacter_F	Helicobacter_F sp002287135
1301	KIJ_genome_8268	Known_MAG	Bacteria	Firmicutes_A	Clostridia	Christensenellales
1302	KIJ_genome_8281	Known_MAG	Bacteria	Bacteroidota	Bacteroidia	Bacteroidales	Marinifilaceae	Butyricimonas	Butyricimonas faecihominis
1303	KIJ_genome_8295	Known_MAG	Bacteria	Actinobacteriota	Coriobacteriia	Coriobacteriales	Coriobacteriaceae	Collinsella
1304	KIJ_genome_8299	Known_MAG	Bacteria	Firmicutes_C	Negativicutes	Veillonellales	Veillonellaceae	Veillonella	Veillonella rogosae
1305	KIJ_genome_8307	Known_MAG	Bacteria	Firmicutes_A	Clostridia	Christensenellales	CAG-917	Limadaptatus	Limadaptatus sp900754695
1306	KIJ_genome_8339	Known_MAG	Bacteria	Firmicutes_C	Negativicutes	Acidaminococcales	Acidaminococcaceae	Phascolarctobacterium	Phascolarctobacterium faecium
1307	KIJ_genome_8347	Known_MAG	Bacteria	Firmicutes_A	Clostridia	Lachnospirales	Lachnospiraceae	Fusicatenibacter	Fusicatenibacter saccharivorans
1308	KIJ_genome_8431	Known_MAG	Bacteria	Patescibacteria	Saccharimonadia	Saccharimonadales	Nanosynbacteraceae	Nanosynbacter
1309	KIJ_genome_8468	Known_MAG	Bacteria	Firmicutes_A	Clostridia	Peptostreptococcales	Anaerovoracaceae	CAG-238	CAG-238 sp900542245
1310	KIJ_genome_85	Known_MAG	Bacteria	Proteobacteria	Gammaproteobacteria	Burkholderiales	Burkholderiaceae	Duodenibacillus	Duodenibacillus massiliensis
1311	KIJ_genome_8503	Known_MAG	Bacteria	Bacteroidota	Bacteroidia	Bacteroidales	Marinifilaceae	Butyricimonas	Butyricimonas faecihominis
1312	KIJ_genome_8506	Known_MAG	Bacteria	Firmicutes_A	Clostridia	Christensenellales	CAG-74	Limiplasma	Limiplasma merdipullorum
1313	KIJ_genome_8518	Known_MAG	Bacteria	Desulfobacterota_I	Desulfovibrionia	Desulfovibrionales	Desulfovibrionaceae	Desulfovibrio	Desulfovibrio fairfieldensis
1314	KIJ_genome_8550	Known_MAG	Bacteria	Actinobacteriota	Coriobacteriia	Coriobacteriales	Coriobacteriaceae	Collinsella	Collinsella sp900541695
1315	KIJ_genome_856	Known_MAG	Bacteria	Firmicutes_A	Clostridia	Oscillospirales	Ruminococcaceae	Avimicrobium
1316	KIJ_genome_8572	Known_MAG	Bacteria	Proteobacteria	Gammaproteobacteria	Enterobacterales	Enterobacteriaceae	Enterobacter	Enterobacter ludwigii
1317	KIJ_genome_859	Known_MAG	Bacteria	Firmicutes_C	Negativicutes	Veillonellales	Veillonellaceae	Veillonella_A	Veillonella_A sp010093125
1318	KIJ_genome_8599	Known_MAG	Bacteria	Firmicutes_A	Clostridia	Oscillospirales	Acutalibacteraceae	Eubacterium_R	Eubacterium_R sp000434995
1319	KIJ_genome_8601	Known_MAG	Bacteria	Firmicutes_A	Clostridia	Oscillospirales	Ruminococcaceae	Fournierella	Fournierella massiliensis
1320	KIJ_genome_8618	Known_MAG	Bacteria	Cyanobacteria	Vampirovibrionia	Gastranaerophilales	Gastranaerophilaceae	Zag111	Zag111 sp002102825
1321	KIJ_genome_8620	Known_MAG	Bacteria	Firmicutes_A	Clostridia	Lachnospirales	Lachnospiraceae	CAG-882	CAG-882 sp003486385
1322	KIJ_genome_8636	Known_MAG	Bacteria	Firmicutes_A	Clostridia	Lachnospirales	Lachnospiraceae	Lachnospira	Lachnospira sp900545725
1323	KIJ_genome_8641	Known_MAG	Bacteria	Verrucomicrobiota	Verrucomicrobiae	Opitutales	CAG-312	Merdousia	Merdousia sp900760665
1324	KIJ_genome_8646	Known_MAG	Bacteria	Firmicutes_A	Clostridia	Lachnospirales	Lachnospiraceae	Acetatifactor	Acetatifactor intestinalis
1325	KIJ_genome_8657	Known_MAG	Bacteria	Firmicutes_A	Clostridia	Lachnospirales	Lachnospiraceae	Eisenbergiella	Eisenbergiella porci
1326	KIJ_genome_8671	Known_MAG	Bacteria	Firmicutes_A	Clostridia	Lachnospirales	Lachnospiraceae	Blautia	Blautia stercoris
1327	KIJ_genome_868	Known_MAG	Bacteria	Firmicutes	Bacilli	Erysipelotrichales	Coprobacillaceae	Faecalibacillus	Faecalibacillus intestinalis
1328	KIJ_genome_8689	Known_MAG	Bacteria	Proteobacteria	Gammaproteobacteria	Enterobacterales	Succinivibrionaceae	Succinivibrio
1329	KIJ_genome_8701	Known_MAG	Bacteria	Firmicutes_A	Clostridia	Lachnospirales	UBA1390	Faecimorpha
1330	KIJ_genome_8727	Known_MAG	Bacteria	Firmicutes_C	Negativicutes	Veillonellales	Veillonellaceae	Veillonella	Veillonella denticariosi
1331	KIJ_genome_8743	Known_MAG	Bacteria	Firmicutes_A	Clostridia	Oscillospirales	Acutalibacteraceae	Ruminococcus_E	Ruminococcus_E sp900314705
1332	KIJ_genome_8774	Known_MAG	Bacteria	Bacteroidota	Bacteroidia	Bacteroidales	Rikenellaceae	Alistipes	Alistipes onderdonkii
1333	KIJ_genome_8778	Known_MAG	Bacteria	Firmicutes_A	Clostridia	Lachnospirales	Lachnospiraceae	Anaerostipes	Anaerostipes caccae
1334	KIJ_genome_8798	Known_MAG	Bacteria	Firmicutes_C	Negativicutes	Veillonellales	Dialisteraceae	Dialister	Dialister sp000434475
1335	KIJ_genome_8799	Known_MAG	Bacteria	Firmicutes_A	Clostridia	Oscillospirales	Acutalibacteraceae	Eubacterium_R	Eubacterium_R sp900547915
1336	KIJ_genome_8800	Known_MAG	Bacteria	Campylobacterota	Campylobacteria	Campylobacterales	Campylobacteraceae	Campylobacter_A	Campylobacter_A concisus_AD
1337	KIJ_genome_8845	Known_MAG	Bacteria	Firmicutes_A	Clostridia	Christensenellales	QAND01	Allochristensenella
1338	KIJ_genome_8856	Known_MAG	Bacteria	Firmicutes_A	Clostridia	Lachnospirales	Lachnospiraceae	Lachnospira	Lachnospira sp003451515
1339	KIJ_genome_8864	Known_MAG	Bacteria	Firmicutes_A	Clostridia	Lachnospirales	CAG-274	Gallispira
1340	KIJ_genome_8915	Known_MAG	Bacteria	Proteobacteria	Gammaproteobacteria	Burkholderiales	Burkholderiaceae	Oxalobacter	Oxalobacter formigenes
1341	KIJ_genome_8916	Known_MAG	Bacteria	Firmicutes_A	Clostridia	Oscillospirales	Butyricicoccaceae	Butyricicoccus	Butyricicoccus pullicaecorum
1342	KIJ_genome_8919	Known_MAG	Bacteria	Proteobacteria	Gammaproteobacteria	Burkholderiales	Burkholderiaceae	Aphodousia	Aphodousia sp900545335
1343	KIJ_genome_8939	Known_MAG	Bacteria	Actinobacteriota	Coriobacteriia	Coriobacteriales	Eggerthellaceae	CAG-1427	CAG-1427 sp000435475
1344	KIJ_genome_8945	Known_MAG	Bacteria	Firmicutes_A	Clostridia	Peptostreptococcales	Anaerovoracaceae	RGIG7444
1345	KIJ_genome_8949	Known_MAG	Bacteria	Firmicutes_C	Negativicutes	Acidaminococcales	Acidaminococcaceae	Acidaminococcus	Acidaminococcus massiliensis
1346	KIJ_genome_8964	Known_MAG	Bacteria	Desulfobacterota_I	Desulfovibrionia	Desulfovibrionales	Desulfovibrionaceae	Desulfovibrio	Desulfovibrio desulfuricans
1347	KIJ_genome_9039	Known_MAG	Bacteria	Firmicutes_A	Clostridia	Oscillospirales	Acutalibacteraceae
1348	KIJ_genome_9091	Known_MAG	Bacteria	Firmicutes_A	Clostridia	UBA1381	UBA1381	CAG-41	CAG-41 sp900066215
2285	MGYG000001074	Known_MAG	Bacteria	Bacteroidota	Bacteroidia	Bacteroidales	Bacteroidaceae	Prevotella	Prevotella sp002251365
1350	KIJ_genome_9110	Known_MAG	Bacteria	Campylobacterota	Campylobacteria	Campylobacterales	Campylobacteraceae	Campylobacter_A
1351	KIJ_genome_9111	Known_MAG	Bacteria	Firmicutes	Bacilli	RFN20	CAG-826	Onthovivens
1352	KIJ_genome_915	Known_MAG	Bacteria	Firmicutes_A	Clostridia	UBA1381	UBA1381	CAG-41	CAG-41 sp900066215
1353	KIJ_genome_9218	Known_MAG	Bacteria	Firmicutes_B	Dehalobacteriia	UBA7702	UBA7702	Cryptoclostridium	Cryptoclostridium obscurum
1354	KIJ_genome_9232	Known_MAG	Bacteria	Firmicutes_A	Clostridia	Lachnospirales	Lachnospiraceae	Anaerostipes	Anaerostipes excrementavium
1355	KIJ_genome_9249	Known_MAG	Bacteria	Desulfobacterota_I	Desulfovibrionia	Desulfovibrionales	Desulfovibrionaceae	Mailhella	Mailhella merdigallinarum
1356	KIJ_genome_925	Known_MAG	Bacteria	Firmicutes_A	Clostridia	Oscillospirales	Acutalibacteraceae	UMGS1474	UMGS1474 sp900547105
1357	KIJ_genome_9270	Known_MAG	Bacteria	Firmicutes_A	Clostridia	Lachnospirales	Anaerotignaceae	Anaerotignum	Anaerotignum faecicola
1358	KIJ_genome_9287	Known_MAG	Bacteria	Firmicutes_A	Clostridia	Lachnospirales	Anaerotignaceae	UBA8514
1359	KIJ_genome_9293	Known_MAG	Bacteria	Proteobacteria	Gammaproteobacteria	Burkholderiales	Burkholderiaceae	Parasutterella	Parasutterella gallistercoris
1360	KIJ_genome_9367	Known_MAG	Bacteria	Firmicutes_A	Clostridia	Lachnospirales	Lachnospiraceae	Lachnospira	Lachnospira eligens_A
1361	KIJ_genome_9393	Known_MAG	Bacteria	Proteobacteria	Gammaproteobacteria	Burkholderiales	Burkholderiaceae	Sutterella	Sutterella sp905213905
1362	KIJ_genome_942	Known_MAG	Bacteria	Firmicutes_A	Clostridia	Lachnospirales	Lachnospiraceae	Copromonas	Copromonas sp900066785
1363	KIJ_genome_9469	Known_MAG	Bacteria	Firmicutes_B	Peptococcia	Peptococcales	Peptococcaceae	UBA7185	UBA7185 sp002491065
1364	KIJ_genome_9482	Known_MAG	Bacteria	Firmicutes_A	Clostridia	Oscillospirales	Acutalibacteraceae	UMGS1071
1365	KIJ_genome_9505	Known_MAG	Bacteria	Firmicutes_A	Clostridia	Oscillospirales	Acutalibacteraceae	Ruminococcus_E
1366	KIJ_genome_9522	Known_MAG	Bacteria	Firmicutes_A	Clostridia	Oscillospirales	CAG-382	UMGS1052	UMGS1052 sp900548115
1367	KIJ_genome_9526	Known_MAG	Bacteria	Firmicutes_A	Clostridia	Lachnospirales	Lachnospiraceae	Acetatifactor	Acetatifactor stercoripullorum
1368	KIJ_genome_9528	Known_MAG	Bacteria	Firmicutes_A	Clostridia	Oscillospirales	CAG-272	CAG-448	CAG-448 sp000433415
1369	KIJ_genome_9554	Known_MAG	Bacteria	Fusobacteriota	Fusobacteriia	Fusobacteriales	Fusobacteriaceae	Fusobacterium_B
1370	KIJ_genome_9571	Known_MAG	Bacteria	Bacteroidota	Bacteroidia	Bacteroidales	Bacteroidaceae	Alloprevotella	Alloprevotella sp900546605
1371	KIJ_genome_9626	Known_MAG	Bacteria	Firmicutes_A	Clostridia	UBA1381	UBA1381	Ornithomonoglobus	Ornithomonoglobus sp904420525
1372	KIJ_genome_9627	Known_MAG	Bacteria	Desulfobacterota_I	Desulfovibrionia	Desulfovibrionales	Desulfovibrionaceae	Bilophila	Bilophila sp900550745
103	KIJ_genome_10402	Known_MAG	Bacteria	Bacteroidota	Bacteroidia	Bacteroidales	Bacteroidaceae	Prevotella	Prevotella sp002251385
1374	KIJ_genome_9643	Known_MAG	Bacteria	Firmicutes_A	Clostridia	Lachnospirales	Lachnospiraceae	Butyribacter	Butyribacter sp000436755
1375	KIJ_genome_9665	Known_MAG	Bacteria	Actinobacteriota	Coriobacteriia	Coriobacteriales	Eggerthellaceae	Aveggerthella	Aveggerthella stercoripullorum
1376	KIJ_genome_9667	Known_MAG	Bacteria	Firmicutes_A	Clostridia	Oscillospirales	CAG-272	Avispirillum	Avispirillum sp900555345
1377	KIJ_genome_9698	Known_MAG	Bacteria	Firmicutes_A	Clostridia	Christensenellales	Christensenellaceae	HGM11616
1378	KIJ_genome_9714	Known_MAG	Bacteria	Firmicutes_A	Clostridia	Oscillospirales	Oscillospiraceae	Dysosmobacter	Dysosmobacter sp004553545
1379	KIJ_genome_9733	Known_MAG	Bacteria	Firmicutes_C	Negativicutes	Veillonellales	Dialisteraceae	Dialister	Dialister succinatiphilus
1380	KIJ_genome_9741	Known_MAG	Bacteria	Firmicutes_A	Clostridia	Oscillospirales	Acutalibacteraceae	Heritagella
1381	KIJ_genome_975	Known_MAG	Bacteria	Firmicutes_A	Clostridia	Oscillospirales	Oscillospiraceae	CAG-170	CAG-170 sp002404795
1382	KIJ_genome_9762	Known_MAG	Bacteria	Firmicutes_A	Clostridia	Lachnospirales	Lachnospiraceae	Limivivens	Limivivens sp905214955
1383	KIJ_genome_9799	Known_MAG	Bacteria	Bacteroidota	Bacteroidia	Bacteroidales	Marinifilaceae	Odoribacter	Odoribacter splanchnicus
1384	KIJ_genome_9814	Known_MAG	Bacteria	Firmicutes_A	Clostridia	Lachnospirales	Lachnospiraceae
1385	KIJ_genome_9844	Known_MAG	Bacteria	Bacteroidota	Bacteroidia	Bacteroidales	Bacteroidaceae	Paraprevotella	Paraprevotella clara
1386	KIJ_genome_9940	Known_MAG	Bacteria	Firmicutes_A	Clostridia	Lachnospirales	Lachnospiraceae	Lactonifactor	Lactonifactor sp009677585
1387	KIJ_genome_9964	Known_MAG	Bacteria	Firmicutes_A	Clostridia	Lachnospirales	Lachnospiraceae	Lachnospira	Lachnospira sp003537285
1388	KIJ_genome_9975	Known_MAG	Bacteria	Firmicutes_A	Clostridia	Oscillospirales	Acutalibacteraceae	UBA1417	UBA1417 sp003531055
1389	KR004E_Post2_refinedBins_bin.87	Malaysia_MAG	Bacteria	Firmicutes_C	Negativicutes	Veillonellales	Veillonellaceae	Veillonella	Veillonella sp003463825
674	KIJ_genome_22120	Known_MAG	Bacteria	Bacteroidota	Bacteroidia	Bacteroidales	Bacteroidaceae	Prevotella	Prevotella sp002265625
1391	KR004F_Pre_refinedBins_bin.5	Known_MAG	Bacteria	Bacteroidota	Bacteroidia	Bacteroidales	Bacteroidaceae	Alloprevotella	Alloprevotella sp900542795
1392	KR005C_Pre_refinedBins_bin.126	Malaysia_MAG	Bacteria	Firmicutes	Bacilli	RF39	UBA660	Scybalousia	Scybalousia sp900542735
1393	KR026A_Pre_refinedBins_bin.58	Malaysia_MAG	Bacteria	Firmicutes_A	Clostridia	Oscillospirales	Oscillospiraceae	HGM13006
1394	KR030D_Pre_refinedBins_bin.108	Known_MAG	Bacteria	Firmicutes_A	Clostridia	Oscillospirales	Acutalibacteraceae	Eubacterium_R	Eubacterium_R sp000436835
1395	KR032A_Post1_refinedBins_bin.10	Malaysia_MAG	Bacteria	Verrucomicrobiota	Lentisphaeria	Victivallales	UBA1829	UBA1829	UBA1829 sp900549045
1396	KR032A_Post1_refinedBins_bin.72	Malaysia_MAG	Bacteria	Firmicutes_A	Clostridia	Oscillospirales	Oscillospiraceae	CAG-170
1397	KR032A_Post1_refinedBins_bin.93	Known_MAG	Bacteria	Firmicutes_A	Clostridia	TANB77	CAG-508	UMGS1901	UMGS1901 sp900553755
1398	KR032A_Post2_refinedBins_bin.52	Known_MAG	Bacteria	Actinobacteriota	Coriobacteriia	Coriobacteriales	Atopobiaceae
1399	KR032A_Pre_refinedBins_bin.41	Malaysia_MAG	Bacteria	Firmicutes_A	Clostridia	Oscillospirales	Oscillospiraceae	CAG-170
1400	KR033B_Pre_refinedBins_bin.43	Known_MAG	Bacteria	Proteobacteria	Gammaproteobacteria	Enterobacterales	Enterobacteriaceae	Kluyvera	Kluyvera georgiana_A
1401	KR033C_Pre_refinedBins_bin.94	Malaysia_MAG	Bacteria	Firmicutes_A	Clostridia	Oscillospirales	Butyricicoccaceae	Agathobaculum	Agathobaculum butyriciproducens
1402	KR042A_Pre_refinedBins_bin.40	Malaysia_MAG	Bacteria	Bacteroidota	Bacteroidia	Bacteroidales	UBA932	Cryptobacteroides
1403	KR042A_Pre_refinedBins_bin.6	Malaysia_MAG	Bacteria	Firmicutes_A	Clostridia	Christensenellales	CAG-74	Limiplasma	Limiplasma sp004556545
1404	KR042A_Pre_refinedBins_bin.87	Malaysia_MAG	Bacteria	Firmicutes	Bacilli	RF39	UBA660	CAG-1000	CAG-1000 sp004560915
1405	KR042B_Pre_refinedBins_bin.25	Known_MAG	Bacteria	Firmicutes	Bacilli	RF39	UBA660	Faecisoma	Faecisoma sp000432255
1406	KR042B_Pre_refinedBins_bin.88	Malaysia_MAG	Bacteria	Firmicutes_A	Clostridia	Lachnospirales	Lachnospiraceae	Lachnoclostridium_B	Lachnoclostridium_B sp900066555
1407	KR042C_Post1_refinedBins_bin.13	Malaysia_MAG	Bacteria	Proteobacteria	Gammaproteobacteria	Enterobacterales	Succinivibrionaceae	Succinivibrio
1408	KR042C_Post1_refinedBins_bin.27	Known_MAG	Bacteria	Firmicutes_A	Clostridia	Lachnospirales	Lachnospiraceae	Hungatella	Hungatella sp005845265
1409	KR042C_Post1_refinedBins_bin.31	Known_MAG	Bacteria	Bacteroidota	Bacteroidia	Bacteroidales	Bacteroidaceae	Bacteroides	Bacteroides sp900552405
1410	KR042C_Post1_refinedBins_bin.34	Malaysia_MAG	Bacteria	Firmicutes_A	Clostridia	Oscillospirales	Ruminococcaceae	Gemmiger	Gemmiger stercoravium
1411	KR042C_Pre_refinedBins_bin.26	Known_MAG	Bacteria	Firmicutes_A	Clostridia	Peptostreptococcales	Peptostreptococcaceae	Intestinibacter	Intestinibacter bartlettii
1412	KR042C_Pre_refinedBins_bin.70	Known_MAG	Bacteria	Firmicutes_A	Clostridia	Lachnospirales	Lachnospiraceae	Eubacterium_G	Eubacterium_G sp900548465
1413	KR042E_Pre_refinedBins_bin.103	Known_MAG	Bacteria	Bacteroidota	Bacteroidia	Bacteroidales	Bacteroidaceae	Bacteroides	Bacteroides sp905197435
1414	KR042E_Pre_refinedBins_bin.58	Known_MAG	Bacteria	Cyanobacteria	Vampirovibrionia	Gastranaerophilales	Gastranaerophilaceae	UMGS1477	UMGS1477 sp900552205
1415	KR042E_Pre_refinedBins_bin.81	Malaysia_MAG	Bacteria	Firmicutes_A	Clostridia	Oscillospirales	Acutalibacteraceae	UMGS1491
1416	KR047A_Post1_refinedBins_bin.36	Known_MAG	Bacteria	Firmicutes_A	Clostridia	Oscillospirales	CAG-272	CAG-841	CAG-841 sp900544285
1417	KR047A_Post1_refinedBins_bin.56	Known_MAG	Bacteria	Elusimicrobiota	Elusimicrobia	Elusimicrobiales	Elusimicrobiaceae	UBA1436	UBA1436 sp900540405
1418	KR047A_Post1_refinedBins_bin.6	Malaysia_MAG	Bacteria	Proteobacteria	Alphaproteobacteria	RF32	CAG-239	CAAFZY01
1419	KR047A_Pre_refinedBins_bin.89	Known_MAG	Bacteria	Bacteroidota	Bacteroidia	Bacteroidales	P3	Onthomorpha	Onthomorpha sp900545215
1420	KR048B_Post2_refinedBins_bin.18	Known_MAG	Bacteria	Firmicutes_A	Clostridia	Lachnospirales	Lachnospiraceae	Coprococcus	Coprococcus sp000154245
1421	KR048B_Pre_refinedBins_bin.22	Known_MAG	Bacteria	Firmicutes_A	Clostridia	Christensenellales	CAG-138	PeH17	PeH17 sp000435055
1422	KR048C_Post1_refinedBins_bin.90	Known_MAG	Bacteria	Firmicutes_A	Clostridia	Lachnospirales	Lachnospiraceae	Butyrivibrio_A	Butyrivibrio_A crossotus
1423	KR048C_Pre_refinedBins_bin.19	Malaysia_MAG	Bacteria	Firmicutes_A	Clostridia	Peptostreptococcales	Anaerovoracaceae	UMGS973	UMGS973 sp900547295
1424	KR048C_Pre_refinedBins_bin.92	Known_MAG	Bacteria	Firmicutes_A	Clostridia	Oscillospirales	Ruminococcaceae	UMGS363	UMGS363 sp900550695
1425	KR050D_Pre_refinedBins_bin.2	Known_MAG	Bacteria	Actinobacteriota	Coriobacteriia	Coriobacteriales	Coriobacteriaceae	Collinsella
1426	KR050D_Pre_refinedBins_bin.3	Malaysia_MAG	Bacteria	Actinobacteriota	Coriobacteriia	Coriobacteriales	Eggerthellaceae	Ellagibacter
1427	KR050D_Pre_refinedBins_bin.84	Malaysia_MAG	Bacteria	Firmicutes_A	Clostridia	Monoglobales	Monoglobaceae	UMGS1820	UMGS1820 sp900555375
1428	KR056A_Pre_refinedBins_bin.2	Known_MAG	Bacteria	Firmicutes_C	Negativicutes	Acidaminococcales	Acidaminococcaceae	Phascolarctobacterium_A	Phascolarctobacterium_A sp900551335
1429	KR059B_Pre_refinedBins_bin.84	Malaysia_MAG	Bacteria	Firmicutes_A	Clostridia	Peptostreptococcales	Anaerovoracaceae	RUG099
1430	KR059B_Pre_refinedBins_bin.94	Malaysia_MAG	Bacteria	Firmicutes	Bacilli	RF39	UBA660	Onthocola_B
1431	KR063A_Pre_refinedBins_bin.26	Malaysia_MAG	Bacteria	Firmicutes	Bacilli	RF39	UBA660	UBA3789
1432	KR067A_Post1_refinedBins_bin.17	Known_MAG	Bacteria	Firmicutes_A	Clostridia	Lachnospirales	Lachnospiraceae	CAG-45	CAG-45 sp000438375
1433	KR067A_Pre_refinedBins_bin.43	Malaysia_MAG	Bacteria	Bacteroidota	Bacteroidia	Bacteroidales	Bacteroidaceae	UBA6398
1434	KR067E_Pre_refinedBins_bin.31	Known_MAG	Bacteria	Firmicutes_A	Clostridia	Oscillospirales	Acutalibacteraceae	UMGS1491	UMGS1491 sp900554775
1435	KR067E_Pre_refinedBins_bin.34	Malaysia_MAG	Bacteria	Actinobacteriota	Coriobacteriia	Coriobacteriales	Coriobacteriaceae	Collinsella
1436	KR067E_Pre_refinedBins_bin.58	Known_MAG	Bacteria	Firmicutes	Bacilli	Erysipelotrichales	Erysipelotrichaceae	Holdemanella	Holdemanella biformis
1437	KR067E_Pre_refinedBins_bin.68	Malaysia_MAG	Bacteria	Firmicutes_A	Clostridia	Oscillospirales	Oscillospiraceae	CAG-83	CAG-83 sp900545495
1438	KR067F_Pre_refinedBins_bin.13	Malaysia_MAG	Bacteria	Firmicutes_A	Clostridia	Lachnospirales	Lachnospiraceae	UMGS2037
4061	MGYG000003493	Known_MAG	Bacteria	Bacteroidota	Bacteroidia	Bacteroidales	Bacteroidaceae	Prevotella	Prevotella sp002299275
1440	KR067G_Post1_refinedBins_bin.96	Known_MAG	Bacteria	Firmicutes	Bacilli	RF39	UBA660	CAG-877	CAG-877 sp000433455
1441	KR067G_Post2_refinedBins_bin.89	Malaysia_MAG	Bacteria	Firmicutes_A	Clostridia	Oscillospirales	Acutalibacteraceae	UMGS1491	UMGS1491 sp900554775
1442	KR067G_Pre_refinedBins_bin.3	Known_MAG	Bacteria	Firmicutes_A	Clostridia	Oscillospirales	Acutalibacteraceae	Ruminococcus_E	Ruminococcus_E sp900314705
1443	KR067G_Pre_refinedBins_bin.5	Known_MAG	Bacteria	Firmicutes_A	Clostridia	Oscillospirales	Oscillospiraceae	HGM13006	HGM13006 sp905202605
1444	KR067G_Pre_refinedBins_bin.79	Known_MAG	Bacteria	Firmicutes_A	Clostridia	Oscillospirales	Acutalibacteraceae	HGM12814	HGM12814 sp900770165
1445	KR067G_Pre_refinedBins_bin.87	Known_MAG	Bacteria	Bacteroidota	Bacteroidia	Bacteroidales	Tannerellaceae	Parabacteroides	Parabacteroides sp900549585
1446	KR067H_Post2_refinedBins_bin.64	Malaysia_MAG	Bacteria	Firmicutes_A	Clostridia	Christensenellales	UBA1750	Spyradocola	Spyradocola sp905193155
1447	KR067H_Post2_refinedBins_bin.71	Known_MAG	Bacteria	Firmicutes_A	Clostridia	Peptostreptococcales	Anaerovoracaceae	VUNA01	VUNA01 sp002299625
1448	KR067H_Post2_refinedBins_bin.95	Malaysia_MAG	Bacteria	Firmicutes_A	Clostridia	Peptostreptococcales	Anaerovoracaceae	Copromorpha	Copromorpha sp905193765
1449	KR067H_Post2_refinedBins_bin.96	Malaysia_MAG	Bacteria	Firmicutes_A	Clostridia	Christensenellales	CAG-74	Aphodomonas	Aphodomonas sp004557805
1450	KR067H_Pre_refinedBins_bin.29	Malaysia_MAG	Bacteria	Spirochaetota	Spirochaetia	Treponematales	Treponemataceae	Treponema_D	Treponema_D sp900541945
1451	KR067H_Pre_refinedBins_bin.55	Malaysia_MAG	Bacteria	Firmicutes_A	Clostridia	Oscillospirales	Oscillospiraceae	CAG-83
1452	KR067H_Pre_refinedBins_bin.8	Known_MAG	Bacteria	Firmicutes_A	Clostridia	Lachnospirales	Lachnospiraceae	UMGS2037
1453	KR069A_Pre_refinedBins_bin.45	Known_MAG	Bacteria	Bacteroidota	Bacteroidia	Bacteroidales	Bacteroidaceae	Bacteroides	Bacteroides fragilis_A
1454	KR069B_Pre_refinedBins_bin.103	Malaysia_MAG	Bacteria	Firmicutes_A	Clostridia	Oscillospirales	Ruminococcaceae	UMGS1668	UMGS1668 sp900553955
1455	KR069B_Pre_refinedBins_bin.55	Malaysia_MAG	Bacteria	Actinobacteriota	Coriobacteriia	Coriobacteriales	Coriobacteriaceae	Collinsella
1456	KR070B_Pre_refinedBins_bin.18	Known_MAG	Bacteria	Firmicutes_A	Clostridia	Lachnospirales	Lachnospiraceae	Blautia_A	Blautia_A sp905209435
1457	KR070B_Pre_refinedBins_bin.33	Known_MAG	Bacteria	Firmicutes_A	Clostridia	Oscillospirales	Acutalibacteraceae	CAG-488	CAG-488 sp000434915
1458	KR091A_Pre_refinedBins_bin.46	Known_MAG	Bacteria	Actinobacteriota	Coriobacteriia	Coriobacteriales	Eggerthellaceae	Senegalimassilia	Senegalimassilia faecalis
1459	KR091C_Pre_refinedBins_bin.53	Known_MAG	Bacteria	Bacteroidota	Bacteroidia	Bacteroidales	Muribaculaceae	CAG-485	CAG-485 sp900550645
1460	KR091C_Pre_refinedBins_bin.59	Known_MAG	Bacteria	Firmicutes_A	Clostridia	Oscillospirales	Oscillospiraceae	Evtepia	Evtepia sp004556345
1461	KR091C_Pre_refinedBins_bin.83	Malaysia_MAG	Bacteria	Firmicutes_A	Clostridia	Peptostreptococcales	Anaerovoracaceae	VUNA01
1462	KR095B_Pre_refinedBins_bin.32	Malaysia_MAG	Bacteria	Spirochaetota	Spirochaetia	Treponematales	Treponemataceae	Treponema_D
1463	KR095B_Pre_refinedBins_bin.38	Malaysia_MAG	Bacteria	Firmicutes_A	Clostridia	Oscillospirales	Acutalibacteraceae	UMGS1491
1464	KR095B_Pre_refinedBins_bin.40	Malaysia_MAG	Bacteria	Verrucomicrobiota	Lentisphaeria	UBA1407	UBA1407	UBA1724	UBA1724 sp900548225
1465	KR095B_Pre_refinedBins_bin.73	Malaysia_MAG	Bacteria	Firmicutes_A	Clostridia	Christensenellales	CAG-138	Phil1	Phil1 sp001940855
1466	KR099A_Post2_refinedBins_bin.33	Malaysia_MAG	Bacteria	Actinobacteriota	Coriobacteriia	Coriobacteriales	Eggerthellaceae	UMGS1502
1467	KR099A_Post2_refinedBins_bin.34	Known_MAG	Bacteria	Firmicutes_A	Clostridia	Clostridiales	Clostridiaceae	Clostridium	Clostridium sp900539375
1468	KR099A_Pre_refinedBins_bin.31	Malaysia_MAG	Bacteria	Firmicutes_A	Clostridia	Oscillospirales	Ruminococcaceae	CAG-353	CAG-353 sp900066885
2002	MGYG000000631	Known_MAG	Bacteria	Bacteroidota	Bacteroidia	Bacteroidales	Bacteroidaceae	Prevotella	Prevotella sp002299635
1470	KR099A_Pre_refinedBins_bin.64	Known_MAG	Bacteria	Firmicutes_A	Clostridia	Lachnospirales	Lachnospiraceae	Agathobacter	Agathobacter sp900548765
1471	LL11A_Pre_refinedBins_bin.80	Malaysia_MAG	Bacteria	Verrucomicrobiota	Verrucomicrobiae	Verrucomicrobiales	Akkermansiaceae	Akkermansia	Akkermansia muciniphila
1472	LL11A_Pre_refinedBins_bin.82	Malaysia_MAG	Bacteria	Firmicutes_A	Clostridia	Oscillospirales	Oscillospiraceae	CAG-83	CAG-83 sp003487665
1473	LL11B_Pre_refinedBins_bin.63	Malaysia_MAG	Bacteria	Bacteroidota	Bacteroidia	Bacteroidales	Bacteroidaceae	Alloprevotella
1474	LL12A_Pre_refinedBins_bin.6	Malaysia_MAG	Bacteria	Proteobacteria	Gammaproteobacteria	Enterobacterales	Enterobacteriaceae	Klebsiella	Klebsiella pneumoniae
1475	LL12C_Pre_refinedBins_bin.56	Malaysia_MAG	Bacteria	Firmicutes	Bacilli	Lactobacillales	Lactobacillaceae	Weissella	Weissella cibaria
1476	LL13A_Pre_refinedBins_bin.29	Malaysia_MAG	Bacteria	Firmicutes	Bacilli	Erysipelotrichales	Erysipelotrichaceae	Bulleidia
1477	LL13A_Pre_refinedBins_bin.31	Known_MAG	Bacteria	Firmicutes_A	Clostridia	Oscillospirales	Oscillospiraceae	UMGS1766	UMGS1766 sp900554855
1478	LL13C_Pre_refinedBins_bin.9	Malaysia_MAG	Bacteria	Firmicutes	Bacilli	Lactobacillales	Lactobacillaceae	Weissella	Weissella cibaria
1479	LL14A_Pre_refinedBins_bin.65	Malaysia_MAG	Bacteria	Firmicutes_A	Clostridia	Oscillospirales	Oscillospiraceae	HGM13006
1480	LL15A_Pre_refinedBins_bin.66	Malaysia_MAG	Bacteria	Firmicutes_A	Clostridia	Oscillospirales	Oscillospiraceae	Faecousia	Faecousia sp000434635
1481	LL1B_Pre_refinedBins_bin.43	Malaysia_MAG	Bacteria	Bacteroidota	Bacteroidia	Bacteroidales	Muribaculaceae	Limisoma	Limisoma sp000437795
1482	LL1C_Pre_refinedBins_bin.56	Malaysia_MAG	Bacteria	Firmicutes_A	Clostridia	Lachnospirales	Lachnospiraceae	Agathobacter	Agathobacter rectalis
1483	LL22A_Pre_refinedBins_bin.22	Known_MAG	Bacteria	Proteobacteria	Alphaproteobacteria	Rs-D84	Rs-D84	Enterousia	Enterousia sp900549365
1484	LL22B_Pre_refinedBins_bin.25	Known_MAG	Bacteria	Firmicutes	Bacilli	Erysipelotrichales	Erysipelotrichaceae	UBA636	UBA636 sp900546285
1485	LL22B_Pre_refinedBins_bin.74	Malaysia_MAG	Bacteria	Spirochaetota	Spirochaetia	Treponematales	Treponemataceae	Treponema_D
1486	LL22B_Pre_refinedBins_bin.85	Malaysia_MAG	Bacteria	Firmicutes_A	Clostridia	Oscillospirales	Ruminococcaceae	Ruminiclostridium_E
1487	LL22B_Pre_refinedBins_bin.9	Malaysia_MAG	Bacteria	Elusimicrobiota	Elusimicrobia	Elusimicrobiales	Elusimicrobiaceae	UBA1436	UBA1436 sp900541355
1488	LL24A_Pre_refinedBins_bin.21	Malaysia_MAG	Bacteria	Proteobacteria	Gammaproteobacteria	Enterobacterales	Enterobacteriaceae	Escherichia	Escherichia coli
1489	LL24A_Pre_refinedBins_bin.31	Known_MAG	Bacteria	Firmicutes	Bacilli	Mycoplasmatales	UBA3375	UBA3375	UBA3375 sp900551955
1490	LL24A_Pre_refinedBins_bin.55	Malaysia_MAG	Bacteria	Actinobacteriota	Coriobacteriia	Coriobacteriales	Coriobacteriaceae	Collinsella
1491	LL25A_Pre_refinedBins_bin.15	Known_MAG	Bacteria	Firmicutes	Bacilli	Lactobacillales	Enterococcaceae	Enterococcus_B	Enterococcus_B lactis
1492	LL25A_Pre_refinedBins_bin.4	Malaysia_MAG	Bacteria	Firmicutes_C	Negativicutes	Veillonellales	Veillonellaceae	Veillonella
1493	LL2B_Pre_refinedBins_bin.59	Known_MAG	Bacteria	Firmicutes	Bacilli	Lactobacillales	Streptococcaceae	Streptococcus	Streptococcus lutetiensis
1494	LL2C_Pre_refinedBins_bin.94	Known_MAG	Bacteria	Firmicutes_A	Clostridia	Monoglobales	Monoglobaceae	UMGS1820	UMGS1820 sp900545865
1495	LL31A_Pre_refinedBins_bin.37	Malaysia_MAG	Bacteria	Firmicutes_A	Clostridia	Oscillospirales	Ruminococcaceae	Faecalibacterium
1496	LL31A_Pre_refinedBins_bin.58	Malaysia_MAG	Bacteria	Firmicutes	Bacilli	Erysipelotrichales	Coprobacillaceae	Catenibacterium
1497	LL31A_Pre_refinedBins_bin.67	Malaysia_MAG	Bacteria	Firmicutes_A	Clostridia	Oscillospirales	Oscillospiraceae	F23-B02
1498	LL31A_Pre_refinedBins_bin.73	Malaysia_MAG	Bacteria	Firmicutes_A	Clostridia	Oscillospirales	Butyricicoccaceae	Butyricicoccus_A
1499	LL31A_Pre_refinedBins_bin.82	Malaysia_MAG	Bacteria	Firmicutes_A	Clostridia	Lachnospirales	Lachnospiraceae	Mediterraneibacter
1500	LL31A_Pre_refinedBins_bin.86	Malaysia_MAG	Bacteria	Firmicutes	Bacilli	Erysipelotrichales	Erysipelotrichaceae	Holdemanella
1501	LL31D_Pre_refinedBins_bin.72	Known_MAG	Bacteria	Firmicutes_A	Clostridia	Oscillospirales	Acutalibacteraceae	Eubacterium_R	Eubacterium_R sp900539775
1502	LL31F_Pre_refinedBins_bin.54	Malaysia_MAG	Bacteria	Firmicutes	Bacilli	Mycoplasmatales	Mycoplasmoidaceae	Ureaplasma	Ureaplasma sp900544585
1503	LL31F_Pre_refinedBins_bin.6	Malaysia_MAG	Bacteria	Firmicutes_A	Clostridia	Lachnospirales	Lachnospiraceae	Acetatifactor
1504	LL32D_Pre_refinedBins_bin.71	Malaysia_MAG	Bacteria	Firmicutes_A	Clostridia	Oscillospirales	Ruminococcaceae	CAG-115	CAG-115 sp003507295
1505	LL33A_Pre_refinedBins_bin.68	Malaysia_MAG	Bacteria	Firmicutes_A	Clostridia	Oscillospirales	Acutalibacteraceae	UMGS1491	UMGS1491 sp900554335
1506	LL41A_Pre_refinedBins_bin.14	Known_MAG	Bacteria	Spirochaetota	Spirochaetia	Treponematales	Treponemataceae	Treponema_D	Treponema_D succinifaciens
1507	LL41A_Pre_refinedBins_bin.17	Known_MAG	Bacteria	Firmicutes_A	Clostridia	Oscillospirales	Acutalibacteraceae	Clostridium_A	Clostridium_A leptum
1508	LL41A_Pre_refinedBins_bin.53	Known_MAG	Bacteria	Firmicutes_A	Clostridia	Oscillospirales	Acutalibacteraceae	Heritagella
1509	LL41A_Pre_refinedBins_bin.60	Known_MAG	Bacteria	Firmicutes_A	Clostridia	Christensenellales	CAG-74	Faecivicinus	Faecivicinus sp900553265
1510	LL41A_Pre_refinedBins_bin.63	Known_MAG	Bacteria	Firmicutes_A	Clostridia	Oscillospirales	Acutalibacteraceae	NSJ-40	NSJ-40 sp014384705
1511	LL41A_Pre_refinedBins_bin.93	Malaysia_MAG	Bacteria	Firmicutes_A	Clostridia	Oscillospirales	Acutalibacteraceae
1512	LL41B_Pre_refinedBins_bin.55	Known_MAG	Bacteria	Verrucomicrobiota	Kiritimatiellae	RFP12	UBA1067	UBA1731
1513	LL41B_Pre_refinedBins_bin.66	Malaysia_MAG	Bacteria	Firmicutes_A	Clostridia	Christensenellales	UBA1242	UMGS2070
1514	LL42D_Pre_refinedBins_bin.70	Known_MAG	Bacteria	Firmicutes	Bacilli	RF39	UBA660	UBA3789	UBA3789 sp900543055
1515	LL4C_Pre_refinedBins_bin.2	Known_MAG	Bacteria	Firmicutes_A	Clostridia	Lachnospirales	Lachnospiraceae	CAG-791	CAG-791 sp000431495
1516	LL4D_Pre_refinedBins_bin.63	Malaysia_MAG	Bacteria	Firmicutes_A	Clostridia	Clostridiales	Clostridiaceae	Clostridium_P	Clostridium_P perfringens
1517	LL51C_Pre_refinedBins_bin.126	Malaysia_MAG	Bacteria	Actinobacteriota	Actinomycetia	Propionibacteriales	Propionibacteriaceae	Micropruina	Micropruina sp018055925
1518	LL51C_Pre_refinedBins_bin.136	Known_MAG	Bacteria	Verrucomicrobiota	Verrucomicrobiae	Opitutales	CAG-312	Merdousia	Merdousia sp900546565
1519	LL51C_Pre_refinedBins_bin.146	Malaysia_MAG	Bacteria	Firmicutes_A	Clostridia	Oscillospirales	CAG-272	CAG-448	CAG-448 sp003150135
1520	LL51C_Pre_refinedBins_bin.18	Malaysia_MAG	Bacteria	Firmicutes_A	Clostridia	Oscillospirales	Acutalibacteraceae	Heritagella
1521	LL51C_Pre_refinedBins_bin.73	Malaysia_MAG	Bacteria	Firmicutes_A	Clostridia	Oscillospirales	Ruminococcaceae	Faecalibacterium
1522	LL51C_Pre_refinedBins_bin.88	Malaysia_MAG	Bacteria	Verrucomicrobiota	Verrucomicrobiae	Opitutales	CAG-312	QALA01	QALA01 sp003343565
1523	LL51C_Pre_refinedBins_bin.97	Malaysia_MAG	Bacteria	Firmicutes_A	Clostridia	Christensenellales	DTU072	CAG-1782
1524	LL51E_Pre_refinedBins_bin.14	Malaysia_MAG	Bacteria	Firmicutes_A	Clostridia	Oscillospirales	Oscillospiraceae	CAG-170
1525	LL51E_Pre_refinedBins_bin.43	Malaysia_MAG	Bacteria	Elusimicrobiota	Elusimicrobia	Elusimicrobiales	Elusimicrobiaceae	UBA1436	UBA1436 sp900541355
1526	LL53A_Pre_refinedBins_bin.59	Malaysia_MAG	Bacteria	Firmicutes	Bacilli	Lactobacillales	Vagococcaceae	Vagococcus
1527	LL53C_Pre_refinedBins_bin.16	Malaysia_MAG	Bacteria	Firmicutes_A	Clostridia	Oscillospirales	Ruminococcaceae	Faecalibacterium
1528	LL53C_Pre_refinedBins_bin.23	Malaysia_MAG	Bacteria	Firmicutes_A	Clostridia	Clostridiales	Clostridiaceae	Clostridium_P	Clostridium_P perfringens
1529	LL53C_Pre_refinedBins_bin.60	Known_MAG	Bacteria	Firmicutes_A	Clostridia	Oscillospirales	Acutalibacteraceae	Ruminococcus_E	Ruminococcus_E sp003438075
1530	LL53C_Pre_refinedBins_bin.8	Known_MAG	Bacteria	Firmicutes_A	Clostridia	Lachnospirales	Lachnospiraceae	Bariatricus	Bariatricus sp905216215
1531	LL55C_Pre_refinedBins_bin.61	Malaysia_MAG	Bacteria	Firmicutes_C	Negativicutes	Selenomonadales	Selenomonadaceae	Anaerovibrio	Anaerovibrio sp900548165
1532	LL55F_Pre_refinedBins_bin.50	Malaysia_MAG	Bacteria	Proteobacteria	Alphaproteobacteria	Rs-D84	Rs-D84	Enterousia	Enterousia sp900549365
1533	LL57B_Pre_refinedBins_bin.76	Malaysia_MAG	Bacteria	Proteobacteria	Gammaproteobacteria	Enterobacterales	Enterobacteriaceae	Escherichia	Escherichia coli
1534	LL5A_Pre_refinedBins_bin.22	Malaysia_MAG	Bacteria	Firmicutes_A	Clostridia	Oscillospirales	Oscillospiraceae	CAG-103
1535	LL5A_Pre_refinedBins_bin.25	Malaysia_MAG	Bacteria	Actinobacteriota	Coriobacteriia	Coriobacteriales	Atopobiaceae	Parolsenella
1536	LL5A_Pre_refinedBins_bin.54	Malaysia_MAG	Bacteria	Actinobacteriota	Coriobacteriia	Coriobacteriales	Eggerthellaceae	CAG-1427
1537	LL5A_Pre_refinedBins_bin.77	Malaysia_MAG	Bacteria	Firmicutes_A	Clostridia	Christensenellales	GCA-900066905	GCA-900066905	GCA-900066905 sp900066905
1538	LL5A_Pre_refinedBins_bin.85	Malaysia_MAG	Bacteria	Actinobacteriota	Coriobacteriia	Coriobacteriales	Coriobacteriaceae	Collinsella
1539	LL5D_Pre_refinedBins_bin.21	Malaysia_MAG	Bacteria	Bacteroidota	Bacteroidia	Bacteroidales	UBA932	Cryptobacteroides	Cryptobacteroides sp000435075
1540	LL61A_Pre_refinedBins_bin.49	Known_MAG	Bacteria	Cyanobacteria	Vampirovibrionia	Gastranaerophilales	Gastranaerophilaceae	Stercorousia	Stercorousia sp900769355
1541	LL61B_Pre_refinedBins_bin.2	Malaysia_MAG	Bacteria	Firmicutes_A	Clostridia	Oscillospirales	Acutalibacteraceae	UMGS1491
1542	LL61B_Pre_refinedBins_bin.77	Malaysia_MAG	Bacteria	Firmicutes_A	Clostridia	Oscillospirales	Ruminococcaceae	Ruminiclostridium_E	Ruminiclostridium_E sp003512525
1543	LL61D_Pre_refinedBins_bin.51	Malaysia_MAG	Bacteria	Bacteroidota	Bacteroidia	Bacteroidales	Bacteroidaceae	UBA6382	UBA6382 sp900557555
1544	LL62A_Pre_refinedBins_bin.58	Known_MAG	Bacteria	Firmicutes_A	Clostridia	Lachnospirales	Lachnospiraceae	Blautia_A	Blautia_A sp900066335
1545	LL62C_Pre_refinedBins_bin.14	Known_MAG	Bacteria	Firmicutes_A	Clostridia	Christensenellales	CAG-138	RUG472	RUG472 sp900545265
1546	LL62C_Pre_refinedBins_bin.4	Known_MAG	Bacteria	Eremiobacterota	Xenobia	Xenobiales	Xenobiaceae	Bruticola	Bruticola sp004554425
1547	LL62C_Pre_refinedBins_bin.44	Malaysia_MAG	Bacteria	Firmicutes_A	Clostridia	Oscillospirales	Ruminococcaceae	Angelakisella	Angelakisella sp004557855
252	KIJ_genome_13871	Known_MAG	Bacteria	Bacteroidota	Bacteroidia	Bacteroidales	Bacteroidaceae	Prevotella	Prevotella sp002300055
1549	LL63A_Pre_refinedBins_bin.43	Known_MAG	Bacteria	Firmicutes_A	Clostridia	Oscillospirales	Acutalibacteraceae	CAG-964	CAG-964 sp000435335
1550	LL63A_Pre_refinedBins_bin.45	Known_MAG	Bacteria	Firmicutes_A	Clostridia	Christensenellales	CAG-917	CAG-349	CAG-349 sp003539515
1551	LL63A_Pre_refinedBins_bin.58	Known_MAG	Bacteria	Firmicutes_A	Clostridia	Oscillospirales	CAG-272	UMGS902
1552	LL63A_Pre_refinedBins_bin.77	Malaysia_MAG	Bacteria	Firmicutes_A	Clostridia	Christensenellales	CAG-74	SFTH01
1553	LL63A_Pre_refinedBins_bin.87	Malaysia_MAG	Bacteria	Firmicutes_A	Clostridia	Oscillospirales	Oscillospiraceae	CAG-83
1554	LL63B_Pre_refinedBins_bin.47	Malaysia_MAG	Bacteria	Firmicutes	Bacilli	Lactobacillales	Enterococcaceae	Enterococcus_B	Enterococcus_B hirae
1555	LL63B_Pre_refinedBins_bin.58	Malaysia_MAG	Bacteria	Firmicutes_A	Clostridia	Oscillospirales	Acutalibacteraceae	UMGS1484
1556	LL64D_Pre_refinedBins_bin.17	Malaysia_MAG	Bacteria	Actinobacteriota	Coriobacteriia	Coriobacteriales	Coriobacteriaceae	Collinsella
1557	LL64D_Pre_refinedBins_bin.21	Malaysia_MAG	Bacteria	Actinobacteriota	Coriobacteriia	Coriobacteriales	Eggerthellaceae	Slackia_A
1558	LL64D_Pre_refinedBins_bin.25	Malaysia_MAG	Bacteria	Firmicutes_C	Negativicutes	Veillonellales	Dialisteraceae
1559	LL64D_Pre_refinedBins_bin.36	Malaysia_MAG	Bacteria	Proteobacteria	Gammaproteobacteria	Burkholderiales	Burkholderiaceae	Duodenibacillus	Duodenibacillus sp900544335
1560	LL64D_Pre_refinedBins_bin.50	Malaysia_MAG	Bacteria	Actinobacteriota	Coriobacteriia	Coriobacteriales	UMGS124	CAIFEU01	CAIFEU01 sp903789505
1561	LL64D_Pre_refinedBins_bin.56	Malaysia_MAG	Bacteria	Firmicutes_A	Clostridia	Oscillospirales	Oscillospiraceae	Faecousia	Faecousia sp900546075
1562	LL65C_Pre_refinedBins_bin.41	Known_MAG	Bacteria	Firmicutes_A	Clostridia	Oscillospirales	Oscillospiraceae	Faecousia	Faecousia sp900546415
1563	LL65C_Pre_refinedBins_bin.74	Malaysia_MAG	Bacteria	Actinobacteriota	Coriobacteriia	Coriobacteriales	Coriobacteriaceae	Collinsella
1564	LL65D_Pre_refinedBins_bin.101	Malaysia_MAG	Bacteria	Firmicutes_A	Clostridia	Oscillospirales	Ruminococcaceae	UMGS1668	UMGS1668 sp900553955
1565	LL66A_Pre_refinedBins_bin.74	Known_MAG	Bacteria	Firmicutes_A	Clostridia	TANB77	CAG-508	CAG-269
1566	LL66B_Pre_refinedBins_bin.5	Malaysia_MAG	Bacteria	Firmicutes_A	Clostridia	Oscillospirales	Ruminococcaceae	Ruminiclostridium_E	Ruminiclostridium_E siraeum
1567	LL6A_Pre_refinedBins_bin.7	Malaysia_MAG	Bacteria	Firmicutes_A	Clostridia	Peptostreptococcales	Anaerovoracaceae	Eubacterium_T
1568	LL71E_Pre_refinedBins_bin.5	Malaysia_MAG	Bacteria	Firmicutes_B	Peptococcia	Peptococcales	Peptococcaceae	UMGS1590	UMGS1590 sp900552455
1569	LL72A_Pre_refinedBins_bin.84	Known_MAG	Bacteria	Firmicutes_A	Clostridia	Lachnospirales	Lachnospiraceae	Agathobacter	Agathobacter faecis
1570	LL7B_Pre_refinedBins_bin.1	Malaysia_MAG	Bacteria	Actinobacteriota	Coriobacteriia	Coriobacteriales	Coriobacteriaceae	Collinsella
1571	LL8C_Pre_refinedBins_bin.17	Known_MAG	Bacteria	Firmicutes_A	Clostridia	Oscillospirales	Acutalibacteraceae	Ruminococcus_E	Ruminococcus_E sp003526955
1572	LL8C_Pre_refinedBins_bin.50	Malaysia_MAG	Bacteria	Firmicutes	Bacilli	RF39	UBA660	RUG11198
1573	LL8E_Pre_refinedBins_bin.18	Known_MAG	Bacteria	Firmicutes_A	Clostridia	Lachnospirales	Lachnospiraceae	Blautia_A	Blautia_A sp000436615
1574	LL9C_Pre_refinedBins_bin.60	Known_MAG	Bacteria	Actinobacteriota	Coriobacteriia	Coriobacteriales	Coriobacteriaceae	Collinsella
1575	MGYG000000001	Known_MAG	Bacteria	Firmicutes_A	Clostridia	Peptostreptococcales	Peptostreptococcaceae	GCA-900066495	GCA-900066495 sp902362365
1576	MGYG000000003	Known_MAG	Bacteria	Bacteroidota	Bacteroidia	Bacteroidales	Rikenellaceae	Alistipes	Alistipes shahii
1577	MGYG000000005	Known_MAG	Bacteria	Firmicutes_A	Clostridia	Peptostreptococcales	Peptostreptococcaceae	Terrisporobacter	Terrisporobacter glycolicus_A
1578	MGYG000000006	Known_MAG	Bacteria	Firmicutes	Bacilli	Staphylococcales	Staphylococcaceae	Staphylococcus	Staphylococcus xylosus
1579	MGYG000000007	Known_MAG	Bacteria	Firmicutes	Bacilli	Lactobacillales	Lactobacillaceae	Lactobacillus	Lactobacillus intestinalis
1580	MGYG000000008	Known_MAG	Bacteria	Firmicutes	Bacilli	Lactobacillales	Lactobacillaceae	Lactobacillus	Lactobacillus sp910589675
1581	MGYG000000009	Known_MAG	Bacteria	Firmicutes	Bacilli	Lactobacillales	Lactobacillaceae	Ligilactobacillus	Ligilactobacillus murinus
1582	MGYG000000010	Known_MAG	Bacteria	Firmicutes	Bacilli	Staphylococcales	Staphylococcaceae	Mammaliicoccus	Mammaliicoccus lentus
1583	MGYG000000011	Known_MAG	Bacteria	Firmicutes	Bacilli	Staphylococcales	Staphylococcaceae	Staphylococcus	Staphylococcus xylosus_B
1584	MGYG000000012	Known_MAG	Bacteria	Firmicutes	Bacilli	Bacillales	Bacillaceae	Bacillus	Bacillus subtilis
1585	MGYG000000013	Known_MAG	Bacteria	Bacteroidota	Bacteroidia	Bacteroidales	Bacteroidaceae	Bacteroides	Bacteroides sp902362375
1586	MGYG000000014	Known_MAG	Bacteria	Firmicutes_A	Clostridia	Clostridiales	Clostridiaceae	Clostridium	Clostridium butyricum
1587	MGYG000000015	Known_MAG	Bacteria	Proteobacteria	Gammaproteobacteria	Enterobacterales	Enterobacteriaceae	Enterobacter	Enterobacter mori
1588	MGYG000000019	Known_MAG	Bacteria	Proteobacteria	Gammaproteobacteria	Enterobacterales	Enterobacteriaceae	Enterobacter	Enterobacter cloacae_O
1589	MGYG000000020	Known_MAG	Bacteria	Firmicutes	Bacilli	Lactobacillales	Lactobacillaceae	Latilactobacillus	Latilactobacillus curvatus
1590	MGYG000000021	Known_MAG	Bacteria	Firmicutes	Bacilli	Lactobacillales	Lactobacillaceae	Limosilactobacillus	Limosilactobacillus portuensis
1591	MGYG000000023	Known_MAG	Bacteria	Firmicutes	Bacilli	Lactobacillales	Streptococcaceae	Streptococcus	Streptococcus parasanguinis
1592	MGYG000000024	Known_MAG	Bacteria	Firmicutes_A	Clostridia	Peptostreptococcales	Peptostreptococcaceae	Paraclostridium	Paraclostridium bifermentans
1593	MGYG000000025	Known_MAG	Bacteria	Firmicutes	Bacilli	Staphylococcales	Staphylococcaceae	Staphylococcus	Staphylococcus nepalensis
1594	MGYG000000028	Known_MAG	Bacteria	Firmicutes_A	Clostridia	Lachnospirales	Lachnospiraceae	Anaerostipes	Anaerostipes hadrus_A
1595	MGYG000000029	Known_MAG	Bacteria	Bacteroidota	Bacteroidia	Bacteroidales	Bacteroidaceae	Bacteroides	Bacteroides finegoldii
1596	MGYG000000030	Known_MAG	Bacteria	Firmicutes_A	Clostridia	Lachnospirales	Lachnospiraceae	CAG-603	CAG-603 sp900066105
1597	MGYG000000031	Known_MAG	Bacteria	Firmicutes_A	Clostridia	Lachnospirales	Lachnospiraceae	Blautia_A	Blautia_A sp900066205
1598	MGYG000000034	Known_MAG	Bacteria	Firmicutes_A	Clostridia	Oscillospirales	Ruminococcaceae	Massilimaliae	Massilimaliae timonensis
1599	MGYG000000035	Known_MAG	Bacteria	Firmicutes_A	Clostridia	Lachnospirales	Lachnospiraceae	Blautia_A	Blautia_A hydrogenotrophica
1600	MGYG000000037	Known_MAG	Bacteria	Firmicutes	Bacilli	Haloplasmatales_A	Turicibacteraceae	Turicibacter	Turicibacter sp001543345
1601	MGYG000000039	Known_MAG	Bacteria	Firmicutes_A	Clostridia	Oscillospirales	Ruminococcaceae	Faecalibacterium	Faecalibacterium prausnitzii_H
1602	MGYG000000042	Known_MAG	Bacteria	Bacteroidota	Bacteroidia	Bacteroidales	Bacteroidaceae	Phocaeicola	Phocaeicola sp900066445
1603	MGYG000000043	Known_MAG	Bacteria	Bacteroidota	Bacteroidia	Bacteroidales	Bacteroidaceae	Phocaeicola	Phocaeicola merdigallinarum
1604	MGYG000000047	Known_MAG	Bacteria	Firmicutes_A	Clostridia	Clostridiales	Clostridiaceae	Clostridium	Clostridium disporicum
1605	MGYG000000048	Known_MAG	Bacteria	Firmicutes_A	Clostridia	Clostridiales	Clostridiaceae	Clostridium_P	Clostridium_P ventriculi
1606	MGYG000000049	Known_MAG	Bacteria	Firmicutes_A	Clostridia	Peptostreptococcales	Peptostreptococcaceae	GCA-900066495	GCA-900066495 sp900066495
1607	MGYG000000050	Known_MAG	Bacteria	Firmicutes_A	Clostridia	Lachnospirales	Lachnospiraceae	Blautia_A	Blautia_A sp900066505
1608	MGYG000000051	Known_MAG	Bacteria	Firmicutes_A	Clostridia	Lachnospirales	Lachnospiraceae	Merdisoma	Merdisoma sp900066385
1609	MGYG000000052	Known_MAG	Bacteria	Firmicutes_A	Clostridia	Lachnospirales	Lachnospiraceae	Anaerostipes	Anaerostipes sp000508985
1610	MGYG000000053	Known_MAG	Bacteria	Bacteroidota	Bacteroidia	Bacteroidales	Rikenellaceae	Alistipes	Alistipes sp002358415
1611	MGYG000000054	Known_MAG	Bacteria	Bacteroidota	Bacteroidia	Bacteroidales	Bacteroidaceae	Bacteroides	Bacteroides acidifaciens
1612	MGYG000000055	Known_MAG	Bacteria	Bacteroidota	Bacteroidia	Bacteroidales	Muribaculaceae	Muribaculum	Muribaculum intestinale
1613	MGYG000000056	Known_MAG	Bacteria	Bacteroidota	Bacteroidia	Bacteroidales	Muribaculaceae	Muribaculum	Muribaculum faecis
1614	MGYG000000057	Known_MAG	Bacteria	Bacteroidota	Bacteroidia	Bacteroidales	Bacteroidaceae	Bacteroides	Bacteroides sp002491635
1615	MGYG000000058	Known_MAG	Bacteria	Firmicutes_A	Clostridia	Lachnospirales	Lachnospiraceae	Eubacterium_I	Eubacterium_I sp900066595
1616	MGYG000000059	Known_MAG	Bacteria	Firmicutes_A	Clostridia	Oscillospirales	Oscillospiraceae	Lawsonibacter	Lawsonibacter sp900066645
1617	MGYG000000063	Known_MAG	Bacteria	Firmicutes_A	Clostridia	Peptostreptococcales	Anaerovoracaceae	Emergencia	Emergencia sp900066695
1618	MGYG000000064	Known_MAG	Bacteria	Firmicutes_A	Clostridia	Clostridiales	Clostridiaceae	Clostridium	Clostridium baratii
1619	MGYG000000065	Known_MAG	Bacteria	Firmicutes_A	Clostridia	Lachnospirales	Lachnospiraceae	Anaerostipes	Anaerostipes sp900066705
1620	MGYG000000066	Known_MAG	Bacteria	Firmicutes_A	Clostridia	Lachnospirales	Lachnospiraceae	GCA-900066755	GCA-900066755 sp900066755
1621	MGYG000000067	Known_MAG	Bacteria	Firmicutes_A	Clostridia	Lachnospirales	Lachnospiraceae	Lachnoclostridium_B	Lachnoclostridium_B sp900066765
1622	MGYG000000068	Known_MAG	Bacteria	Firmicutes_A	Clostridia	Oscillospirales	Butyricicoccaceae	Agathobaculum	Agathobaculum sp900291975
1623	MGYG000000071	Known_MAG	Bacteria	Firmicutes_A	Clostridia	Oscillospirales	Oscillospiraceae	Pseudoflavonifractor	Pseudoflavonifractor capillosus
1624	MGYG000000073	Known_MAG	Bacteria	Firmicutes_A	Clostridia	Christensenellales	GCA-900066905	GCA-900066905	GCA-900066905 sp900066905
1625	MGYG000000075	Known_MAG	Bacteria	Firmicutes_A	Clostridia	Peptostreptococcales	Peptostreptococcaceae	Paraclostridium	Paraclostridium tenue
1626	MGYG000000079	Known_MAG	Bacteria	Firmicutes	Bacilli	Exiguobacterales	Exiguobacteraceae	Exiguobacterium	Exiguobacterium sp902362975
1627	MGYG000000081	Known_MAG	Bacteria	Actinobacteriota	Actinomycetia	Mycobacteriales	Mycobacteriaceae	Corynebacterium	Corynebacterium propinquum
1628	MGYG000000082	Known_MAG	Bacteria	Proteobacteria	Gammaproteobacteria	Pseudomonadales	Moraxellaceae	Acinetobacter	Acinetobacter fasciculus
1629	MGYG000000083	Known_MAG	Bacteria	Firmicutes	Bacilli	Bacillales_B	DSM-1321	Peribacillus	Peribacillus simplex
1630	MGYG000000086	Known_MAG	Bacteria	Firmicutes_A	Clostridia	Oscillospirales	Oscillospiraceae	Lawsonibacter	Lawsonibacter sp902363045
1631	MGYG000000090	Known_MAG	Bacteria	Firmicutes_A	Clostridia	Oscillospirales	Oscillospiraceae	Lawsonibacter	Lawsonibacter sp014287875
1632	MGYG000000091	Known_MAG	Bacteria	Proteobacteria	Gammaproteobacteria	Burkholderiales	Burkholderiaceae	Achromobacter	Achromobacter xylosoxidans
1633	MGYG000000092	Known_MAG	Bacteria	Firmicutes_A	Clostridia	Lachnospirales	Lachnospiraceae	Choladousia	Choladousia sp902363135
1634	MGYG000000095	Known_MAG	Bacteria	Firmicutes_A	Clostridia	Lachnospirales	Lachnospiraceae	GCA-900066755	GCA-900066755 sp902363085
1635	MGYG000000096	Known_MAG	Bacteria	Firmicutes	Bacilli	Lactobacillales	Lactobacillaceae	Leuconostoc	Leuconostoc pseudomesenteroides
1636	MGYG000000097	Known_MAG	Bacteria	Firmicutes	Bacilli	Lactobacillales	Lactobacillaceae	Ligilactobacillus	Ligilactobacillus animalis
1637	MGYG000000098	Known_MAG	Bacteria	Bacteroidota	Bacteroidia	Bacteroidales	Bacteroidaceae	Bacteroides	Bacteroides bouchesdurhonensis
1638	MGYG000000101	Known_MAG	Bacteria	Actinobacteriota	Actinomycetia	Actinomycetales	Micrococcaceae	Micrococcus	Micrococcus luteus
1639	MGYG000000102	Known_MAG	Bacteria	Firmicutes_A	Clostridia	Peptostreptococcales	Peptostreptococcaceae	Terrisporobacter	Terrisporobacter sp902363255
1640	MGYG000000103	Known_MAG	Bacteria	Firmicutes_A	Clostridia	Peptostreptococcales	Anaerovoracaceae	Bacilliculturomica	Bacilliculturomica massiliensis
1641	MGYG000000104	Known_MAG	Bacteria	Firmicutes_A	Clostridia	Clostridiales	Clostridiaceae	Clostridium	Clostridium cuniculi
1642	MGYG000000105	Known_MAG	Bacteria	Bacteroidota	Bacteroidia	Bacteroidales	Bacteroidaceae	Bacteroides	Bacteroides clarus
1643	MGYG000000106	Known_MAG	Bacteria	Firmicutes	Bacilli	Lactobacillales	Enterococcaceae	Enterococcus_D	Enterococcus_D gallinarum
1644	MGYG000000107	Known_MAG	Bacteria	Proteobacteria	Gammaproteobacteria	Enterobacterales	Enterobacteriaceae	Klebsiella	Klebsiella oxytoca
1645	MGYG000000108	Known_MAG	Bacteria	Proteobacteria	Gammaproteobacteria	Enterobacterales	Enterobacteriaceae	Citrobacter	Citrobacter freundii
1646	MGYG000000109	Known_MAG	Bacteria	Firmicutes	Bacilli	Lactobacillales	Streptococcaceae	Streptococcus	Streptococcus sp004166885
1647	MGYG000000110	Known_MAG	Bacteria	Proteobacteria	Gammaproteobacteria	Enterobacterales	Enterobacteriaceae	Kluyvera	Kluyvera sp902363335
1648	MGYG000000111	Known_MAG	Bacteria	Actinobacteriota	Actinomycetia	Propionibacteriales	Propionibacteriaceae	Cutibacterium	Cutibacterium acnes
1649	MGYG000000112	Known_MAG	Bacteria	Actinobacteriota	Actinomycetia	Actinomycetales	Actinomycetaceae	Actinomyces	Actinomyces sp900323545
1650	MGYG000000114	Known_MAG	Bacteria	Firmicutes	Bacilli	Lactobacillales	Streptococcaceae	Streptococcus	Streptococcus sp902363395
1651	MGYG000000115	Known_MAG	Bacteria	Firmicutes_A	Clostridia	Clostridiales	Clostridiaceae	Clostridium_J	Clostridium_J sp902363375
1652	MGYG000000116	Known_MAG	Bacteria	Firmicutes	Bacilli	Exiguobacterales	Exiguobacteraceae	Exiguobacterium_A	Exiguobacterium_A sp902363455
1653	MGYG000000117	Known_MAG	Bacteria	Bacteroidota	Bacteroidia	Bacteroidales	Barnesiellaceae	CABJAA01	CABJAA01 sp003150885
1654	MGYG000000118	Known_MAG	Bacteria	Firmicutes_A	Clostridia	Lachnospirales	Lachnospiraceae	Paralachnospira	Paralachnospira sp902363445
1655	MGYG000000119	Known_MAG	Bacteria	Firmicutes_A	Clostridia	Lachnospirales	Lachnospiraceae	Blautia	Blautia sp000432195
1656	MGYG000000120	Known_MAG	Bacteria	Firmicutes_A	Clostridia	Tissierellales	Peptoniphilaceae	Peptoniphilus_A	Peptoniphilus_A harei_A
1657	MGYG000000121	Known_MAG	Bacteria	Firmicutes_A	Clostridia	Eubacteriales	Eubacteriaceae	Eubacterium	Eubacterium callanderi
1658	MGYG000000122	Known_MAG	Bacteria	Firmicutes	Bacilli	Staphylococcales	Staphylococcaceae	Staphylococcus	Staphylococcus epidermidis
1659	MGYG000000123	Known_MAG	Bacteria	Firmicutes_A	Clostridia	Lachnospirales	Lachnospiraceae	Blautia	Blautia sp001304935
1660	MGYG000000124	Known_MAG	Bacteria	Proteobacteria	Gammaproteobacteria	Enterobacterales	Enterobacteriaceae	Citrobacter	Citrobacter youngae
1661	MGYG000000125	Known_MAG	Bacteria	Firmicutes_A	Clostridia	Clostridiales	Clostridiaceae	Clostridium_B	Clostridium_B tyrobutyricum
1662	MGYG000000126	Known_MAG	Bacteria	Firmicutes_A	Clostridia	Peptostreptococcales	Anaerovoracaceae	BX12	BX12 sp902363595
1663	MGYG000000127	Known_MAG	Bacteria	Firmicutes_A	Clostridia	Lachnospirales	Lachnospiraceae	Catenibacillus	Catenibacillus sp902363555
1664	MGYG000000128	Known_MAG	Bacteria	Bacteroidota	Bacteroidia	Bacteroidales	Rikenellaceae	Alistipes	Alistipes sp902363575
1665	MGYG000000129	Known_MAG	Bacteria	Firmicutes_A	Clostridia	Oscillospirales	Acutalibacteraceae	Solibaculum	Solibaculum mannosilyticum
1666	MGYG000000130	Known_MAG	Bacteria	Firmicutes_A	Clostridia	Tissierellales	Peptoniphilaceae	Peptoniphilus_C	Peptoniphilus_C sp902363535
1667	MGYG000000131	Known_MAG	Bacteria	Firmicutes_A	Clostridia	Oscillospirales	Ruminococcaceae	Anaerotruncus	Anaerotruncus rubiinfantis
1668	MGYG000000132	Known_MAG	Bacteria	Firmicutes	Bacilli	Erysipelotrichales	Coprobacillaceae	Beduini	Beduini sp902363625
1669	MGYG000000133	Known_MAG	Bacteria	Firmicutes_A	Clostridia	Lachnospirales	Lachnospiraceae	Blautia_A	Blautia_A caecimuris
1670	MGYG000000134	Known_MAG	Bacteria	Firmicutes	Bacilli	Erysipelotrichales	Coprobacillaceae	Longibaculum	Longibaculum muris
1671	MGYG000000135	Known_MAG	Bacteria	Firmicutes_A	Clostridia	Lachnospirales	Lachnospiraceae	Murimonas	Murimonas intestini
1672	MGYG000000136	Known_MAG	Bacteria	Firmicutes_A	Clostridia	Lachnospirales	Lachnospiraceae	Agathobacter	Agathobacter sp000434275
1673	MGYG000000140	Known_MAG	Bacteria	Firmicutes_A	Clostridia	Lachnospirales	Lachnospiraceae	UMGS1375	UMGS1375 sp900066615
1674	MGYG000000141	Known_MAG	Bacteria	Firmicutes_A	Clostridia	Lachnospirales	Lachnospiraceae	Choladocola	Choladocola sp003480725
1675	MGYG000000144	Known_MAG	Bacteria	Bacteroidota	Bacteroidia	Bacteroidales	Barnesiellaceae	Barnesiella	Barnesiella intestinihominis
1676	MGYG000000145	Known_MAG	Bacteria	Firmicutes_A	Clostridia	Lachnospirales	Lachnospiraceae	Lacrimispora	Lacrimispora sp902363735
1677	MGYG000000146	Known_MAG	Bacteria	Firmicutes_A	Clostridia	Lachnospirales	Lachnospiraceae	Dorea	Dorea formicigenerans
1678	MGYG000000147	Known_MAG	Bacteria	Firmicutes	Bacilli	Bacillales	Bacillaceae	Bacillus	Bacillus paralicheniformis
1679	MGYG000000151	Known_MAG	Bacteria	Firmicutes_A	Clostridia	Clostridiales	Clostridiaceae	Clostridium	Clostridium paraputrificum
1680	MGYG000000152	Known_MAG	Bacteria	Firmicutes_A	Clostridia	Lachnospirales	Lachnospiraceae	Lacrimispora	Lacrimispora sp902363835
1681	MGYG000000155	Known_MAG	Bacteria	Firmicutes	Bacilli	Lactobacillales	Lactobacillaceae	Weissella	Weissella confusa
1682	MGYG000000157	Known_MAG	Bacteria	Firmicutes_A	Clostridia	Peptostreptococcales	Peptostreptococcaceae	Paraclostridium	Paraclostridium sordellii
1683	MGYG000000160	Known_MAG	Bacteria	Actinobacteriota	Coriobacteriia	Coriobacteriales	Coriobacteriaceae	Collinsella	Collinsella sp003479805
1684	MGYG000000162	Known_MAG	Bacteria	Firmicutes	Bacilli	Lactobacillales	Enterococcaceae	Enterococcus_B	Enterococcus_B durans
1685	MGYG000000163	Known_MAG	Bacteria	Firmicutes	Bacilli	Lactobacillales	Enterococcaceae	Enterococcus_C	Enterococcus_C asini
1686	MGYG000000164	Known_MAG	Bacteria	Firmicutes_A	Clostridia	Lachnospirales	Lachnospiraceae	Mediterraneibacter_A	Mediterraneibacter_A butyricigenes
1687	MGYG000000165	Known_MAG	Bacteria	Firmicutes_A	Clostridia	Lachnospirales	Lachnospiraceae	Extibacter	Extibacter muris
1688	MGYG000000168	Known_MAG	Bacteria	Bacteroidota	Bacteroidia	Bacteroidales	Marinifilaceae	Butyricimonas	Butyricimonas sp003479425
1689	MGYG000000169	Known_MAG	Bacteria	Firmicutes_A	Clostridia	Lachnospirales	Lachnospiraceae	Eubacterium_G	Eubacterium_G sp000432355
1690	MGYG000000170	Known_MAG	Bacteria	Bacteroidota	Bacteroidia	Bacteroidales	Rikenellaceae	Alistipes_A	Alistipes_A pullistercoris
1691	MGYG000000171	Known_MAG	Bacteria	Firmicutes_A	Clostridia	Lachnospirales	Lachnospiraceae	Blautia_A	Blautia_A sp900120195
1692	MGYG000000172	Known_MAG	Bacteria	Firmicutes_A	Clostridia	Lachnospirales	Lachnospiraceae	Enterocloster	Enterocloster lavalensis
1693	MGYG000000173	Known_MAG	Bacteria	Firmicutes	Bacilli	Erysipelotrichales	Erysipelotrichaceae	Bulleidia	Bulleidia moorei
1694	MGYG000000174	Known_MAG	Bacteria	Bacteroidota	Bacteroidia	Bacteroidales	Tannerellaceae	Parabacteroides	Parabacteroides faecis
1695	MGYG000000175	Known_MAG	Bacteria	Firmicutes_A	Clostridia	Lachnospirales	Lachnospiraceae	Muricomes	Muricomes sp000509105
1696	MGYG000000176	Known_MAG	Bacteria	Firmicutes_A	Clostridia	Lachnospirales	Lachnospiraceae	Muricomes	Muricomes oroticus
1697	MGYG000000178	Known_MAG	Bacteria	Firmicutes_A	Clostridia	Oscillospirales	Oscillospiraceae	Lawsonibacter	Lawsonibacter sp003478995
1698	MGYG000000181	Known_MAG	Bacteria	Firmicutes_A	Clostridia	Lachnospirales	Lachnospiraceae	UBA9414	UBA9414 sp003458885
1699	MGYG000000184	Known_MAG	Bacteria	Firmicutes_A	Clostridia	Lachnospirales	Lachnospiraceae	Blautia_A	Blautia_A luti
1700	MGYG000000188	Known_MAG	Bacteria	Actinobacteriota	Coriobacteriia	Coriobacteriales	Coriobacteriaceae	Collinsella	Collinsella sp003462685
1701	MGYG000000191	Known_MAG	Bacteria	Firmicutes	Bacilli	Bacillales_B	Bacillaceae_C	Weizmannia	Weizmannia coagulans
1702	MGYG000000198	Known_MAG	Bacteria	Firmicutes_A	Clostridia	Lachnospirales	Lachnospiraceae	Enterocloster	Enterocloster citroniae
1703	MGYG000000200	Known_MAG	Bacteria	Firmicutes_A	Clostridia	Lachnospirales	Lachnospiraceae	Blautia_A	Blautia_A sp003471165
1704	MGYG000000201	Known_MAG	Bacteria	Firmicutes_A	Clostridia	Lachnospirales	Lachnospiraceae	Blautia_A	Blautia_A sp900066145
1705	MGYG000000202	Known_MAG	Bacteria	Firmicutes_A	Clostridia	Lachnospirales	Lachnospiraceae	AF33-28	AF33-28 sp003477885
1706	MGYG000000204	Known_MAG	Bacteria	Firmicutes_A	Clostridia	Lachnospirales	Lachnospiraceae	Eubacterium_G	Eubacterium_G sp000435815
1707	MGYG000000206	Known_MAG	Bacteria	Firmicutes_A	Clostridia	Lachnospirales	Lachnospiraceae	Lachnoclostridium_B	Lachnoclostridium_B sp900066555
1708	MGYG000000211	Known_MAG	Bacteria	Bacteroidota	Bacteroidia	Bacteroidales	Bacteroidaceae	Bacteroides	Bacteroides sp900556215
1709	MGYG000000212	Known_MAG	Bacteria	Firmicutes_A	Clostridia	Lachnospirales	Lachnospiraceae	Blautia_A	Blautia_A obeum
1710	MGYG000000213	Known_MAG	Bacteria	Firmicutes_A	Clostridia	Lachnospirales	Lachnospiraceae	Blautia_A	Blautia_A sp003477525
1711	MGYG000000216	Known_MAG	Bacteria	Firmicutes_A	Clostridia	Lachnospirales	Lachnospiraceae	Blautia_A	Blautia_A sp003474435
1712	MGYG000000218	Known_MAG	Bacteria	Firmicutes_C	Negativicutes	Acidaminococcales	Acidaminococcaceae	Acidaminococcus	Acidaminococcus provencensis
1713	MGYG000000219	Known_MAG	Bacteria	Firmicutes_A	Clostridia	Eubacteriales	Eubacteriaceae	Eubacterium	Eubacterium maltosivorans
1714	MGYG000000221	Known_MAG	Bacteria	Bacteroidota	Bacteroidia	Bacteroidales	Tannerellaceae	Parabacteroides	Parabacteroides bouchesdurhonensis
1715	MGYG000000222	Known_MAG	Bacteria	Bacteroidota	Bacteroidia	Bacteroidales	Tannerellaceae	Parabacteroides	Parabacteroides sp003473295
1716	MGYG000000224	Known_MAG	Bacteria	Bacteroidota	Bacteroidia	Bacteroidales	Bacteroidaceae	Bacteroides	Bacteroides sp003545565
1717	MGYG000000227	Known_MAG	Bacteria	Firmicutes	Bacilli	Bacillales	Bacillaceae	Bacillus	Bacillus sonorensis
1718	MGYG000000229	Known_MAG	Bacteria	Firmicutes_A	Clostridia	Lachnospirales	Lachnospiraceae	CAG-317	CAG-317 sp000433215
1719	MGYG000000230	Known_MAG	Bacteria	Firmicutes	Bacilli	Lactobacillales	Streptococcaceae	Lactococcus	Lactococcus petauri
1720	MGYG000000233	Known_MAG	Bacteria	Firmicutes_A	Clostridia	Lachnospirales	Lachnospiraceae	Copromonas	Copromonas sp900066785
1721	MGYG000000234	Known_MAG	Bacteria	Firmicutes	Bacilli	Lactobacillales	Vagococcaceae	Vagococcus	Vagococcus teuberi
1722	MGYG000000235	Known_MAG	Bacteria	Proteobacteria	Gammaproteobacteria	Enterobacterales	Enterobacteriaceae	Enterobacter	Enterobacter kobei
1723	MGYG000000238	Known_MAG	Bacteria	Firmicutes	Bacilli	Lactobacillales	Enterococcaceae	Enterococcus_D	Enterococcus_D casseliflavus
1724	MGYG000000239	Known_MAG	Bacteria	Actinobacteriota	Coriobacteriia	Coriobacteriales	Coriobacteriaceae	Collinsella	Collinsella sp003471585
1725	MGYG000000240	Known_MAG	Bacteria	Firmicutes	Bacilli	Erysipelotrichales	Erysipelotrichaceae	Amedibacterium	Amedibacterium intestinale
1726	MGYG000000241	Known_MAG	Bacteria	Desulfobacterota_I	Desulfovibrionia	Desulfovibrionales	Desulfovibrionaceae	Desulfovibrio	Desulfovibrio legallii
1727	MGYG000000243	Known_MAG	Bacteria	Bacteroidota	Bacteroidia	Bacteroidales	Bacteroidaceae	Phocaeicola	Phocaeicola massiliensis
1728	MGYG000000250	Known_MAG	Bacteria	Firmicutes_A	Clostridia	Lachnospirales	Lachnospiraceae	Butyribacter	Butyribacter intestini
1729	MGYG000000252	Known_MAG	Bacteria	Firmicutes_A	Clostridia	Lachnospirales	Lachnospiraceae	Blautia_A	Blautia_A obeum_B
1730	MGYG000000255	Known_MAG	Bacteria	Firmicutes_A	Clostridia	Lachnospirales	Lachnospiraceae	Copromonas	Copromonas sp900066055
1731	MGYG000000259	Known_MAG	Bacteria	Firmicutes_A	Clostridia	Lachnospirales	Lachnospiraceae	Ventrimonas	Ventrimonas sp003480315
1732	MGYG000000264	Known_MAG	Bacteria	Firmicutes	Bacilli	Exiguobacterales	Exiguobacteraceae	Exiguobacterium	Exiguobacterium sp003467445
1733	MGYG000000265	Known_MAG	Bacteria	Bacteroidota	Bacteroidia	Bacteroidales	Bacteroidaceae	Bacteroides	Bacteroides nordii
1734	MGYG000000268	Known_MAG	Bacteria	Firmicutes_A	Clostridia	Lachnospirales	Lachnospiraceae	Schaedlerella	Schaedlerella sp900066545
1735	MGYG000000269	Known_MAG	Bacteria	Firmicutes	Bacilli	Erysipelotrichales	Coprobacillaceae	Faecalibacillus	Faecalibacillus sp003480255
4847	MGYG000004561	Known_MAG	Bacteria	Bacteroidota	Bacteroidia	Bacteroidales	Bacteroidaceae	Prevotella	Prevotella sp002480935
1737	MGYG000000273	Known_MAG	Bacteria	Bacteroidota	Bacteroidia	Bacteroidales	Bacteroidaceae	Phocaeicola	Phocaeicola coprophilus
1738	MGYG000000274	Known_MAG	Bacteria	Firmicutes_A	Clostridia	Lachnospirales	Lachnospiraceae	Ventrimonas	Ventrimonas sp003506385
1739	MGYG000000277	Known_MAG	Bacteria	Firmicutes	Bacilli	Lactobacillales	Streptococcaceae	Streptococcus	Streptococcus mutans
1740	MGYG000000279	Known_MAG	Bacteria	Firmicutes_C	Negativicutes	Veillonellales	Veillonellaceae	Veillonella	Veillonella sp003463825
1741	MGYG000000281	Known_MAG	Bacteria	Firmicutes_A	Clostridia	Lachnospirales	Lachnospiraceae	Lachnoclostridium_A	Lachnoclostridium_A sp003464085
1742	MGYG000000283	Known_MAG	Bacteria	Actinobacteriota	Coriobacteriia	Coriobacteriales	Coriobacteriaceae	Collinsella
1743	MGYG000000284	Known_MAG	Bacteria	Bacteroidota	Bacteroidia	Bacteroidales	Tannerellaceae	Parabacteroides	Parabacteroides sp900540715
1744	MGYG000000285	Known_MAG	Bacteria	Firmicutes_B	Peptococcia	Peptococcales	Peptococcaceae	UBA7185	UBA7185 sp900556545
1745	MGYG000000286	Known_MAG	Bacteria	Firmicutes_A	Clostridia	Lachnospirales	CAG-274	JAHALF01	JAHALF01 sp018371275
1746	MGYG000000287	Known_MAG	Bacteria	Firmicutes_A	Clostridia	Lachnospirales	Lachnospiraceae	Robinsoniella	Robinsoniella sp900539655
1747	MGYG000000292	Known_MAG	Bacteria	Actinobacteriota	Coriobacteriia	Coriobacteriales	Coriobacteriaceae	Collinsella	Collinsella sp900551635
1748	MGYG000000295	Known_MAG	Bacteria	Firmicutes_A	Clostridia	Oscillospirales	Acutalibacteraceae	Clostridium_E	Clostridium_E sporosphaeroides
1749	MGYG000000296	Known_MAG	Bacteria	Firmicutes_A	Clostridia	Peptostreptococcales	Peptostreptococcaceae	Peptostreptococcus	Peptostreptococcus anaerobius
1750	MGYG000000297	Known_MAG	Bacteria	Firmicutes	Bacilli	RF39	UBA660	Scybalousia	Scybalousia sp900543675
1751	MGYG000000298	Known_MAG	Bacteria	Firmicutes	Bacilli	Lactobacillales	Streptococcaceae	Streptococcus
1752	MGYG000000299	Known_MAG	Bacteria	Actinobacteriota	Actinomycetia	Actinomycetales	Actinomycetaceae	Pauljensenia	Pauljensenia sp900541895
1753	MGYG000000300	Known_MAG	Bacteria	Actinobacteriota	Coriobacteriia	Coriobacteriales	Eggerthellaceae	CAG-1427
1754	MGYG000000301	Known_MAG	Bacteria	Firmicutes_A	Clostridia	Lachnospirales	Lachnospiraceae	Blautia_A	Blautia_A sp900541985
1755	MGYG000000302	Known_MAG	Bacteria	Actinobacteriota	Coriobacteriia	Coriobacteriales	Coriobacteriaceae	Collinsella	Collinsella sp900540905
1756	MGYG000000303	Known_MAG	Bacteria	Actinobacteriota	Actinomycetia	Actinomycetales	Actinomycetaceae	Varibaculum	Varibaculum cambriense_A
1757	MGYG000000304	Known_MAG	Bacteria	Actinobacteriota	Coriobacteriia	Coriobacteriales	Eggerthellaceae	CAG-1427	CAG-1427 sp900542525
1758	MGYG000000305	Known_MAG	Bacteria	Bacteroidota	Bacteroidia	Bacteroidales	Paludibacteraceae	RF16	RF16 sp900542355
1759	MGYG000000308	Known_MAG	Bacteria	Actinobacteriota	Actinomycetia	Actinomycetales	Actinomycetaceae	Pauljensenia	Pauljensenia sp001064145
1760	MGYG000000310	Known_MAG	Bacteria	Firmicutes_C	Negativicutes	Acidaminococcales	Acidaminococcaceae	Phascolarctobacterium_A	Phascolarctobacterium_A sp900552855
1761	MGYG000000311	Known_MAG	Bacteria	Firmicutes_C	Negativicutes	Veillonellales	Veillonellaceae	Veillonella	Veillonella sp900550175
1762	MGYG000000312	Known_MAG	Bacteria	Firmicutes_A	Clostridia	Lachnospirales	Lachnospiraceae	Eisenbergiella	Eisenbergiella sp900539715
1763	MGYG000000313	Known_MAG	Bacteria	Actinobacteriota	Coriobacteriia	Coriobacteriales	Coriobacteriaceae	Collinsella	Collinsella vaginalis
1764	MGYG000000314	Known_MAG	Bacteria	Actinobacteriota	Coriobacteriia	Coriobacteriales	Coriobacteriaceae	Collinsella	Collinsella sp900550355
1765	MGYG000000315	Known_MAG	Bacteria	Cyanobacteria	Vampirovibrionia	Gastranaerophilales	Gastranaerophilaceae	Spyradomonas	Spyradomonas sp900547585
1766	MGYG000000316	Known_MAG	Bacteria	Firmicutes_A	Clostridia	Oscillospirales	Acutalibacteraceae	UBA945	UBA945 sp900549675
1767	MGYG000000318	Known_MAG	Bacteria	Firmicutes	Bacilli	Lactobacillales	Streptococcaceae	Streptococcus	Streptococcus infantis_I
1768	MGYG000000319	Known_MAG	Bacteria	Firmicutes_A	Clostridia	Oscillospirales	Ruminococcaceae	Pygmaiobacter	Pygmaiobacter massiliensis
1769	MGYG000000321	Known_MAG	Bacteria	Actinobacteriota	Coriobacteriia	Coriobacteriales	Coriobacteriaceae	Collinsella	Collinsella sp900549355
1770	MGYG000000322	Known_MAG	Bacteria	Bacteroidota	Bacteroidia	Bacteroidales	Marinifilaceae	Odoribacter	Odoribacter sp900544025
1771	MGYG000000325	Known_MAG	Bacteria	Firmicutes_A	Clostridia	Lachnospirales	Lachnospiraceae	CAG-95
1772	MGYG000000326	Known_MAG	Bacteria	Actinobacteriota	Actinomycetia	Actinomycetales	Micrococcaceae	Rothia	Rothia terrae
1773	MGYG000000328	Known_MAG	Bacteria	Firmicutes_A	Clostridia	Oscillospirales	CAG-272	CAG-272	CAG-272 sp900556615
1774	MGYG000000330	Known_MAG	Bacteria	Firmicutes	Bacilli	Lactobacillales	Lactobacillaceae	Lentilactobacillus	Lentilactobacillus parabuchneri
1775	MGYG000000332	Known_MAG	Bacteria	Firmicutes	Bacilli	RF39	UBA660	CAG-605	CAG-605 sp000433255
1776	MGYG000000334	Known_MAG	Bacteria	Firmicutes_A	Clostridia	Oscillospirales	Oscillospiraceae	Scatomorpha
1777	MGYG000000335	Known_MAG	Bacteria	Firmicutes	Bacilli	Lactobacillales	Enterococcaceae	Enterococcus_G	Enterococcus_G italicus
1778	MGYG000000336	Known_MAG	Bacteria	Actinobacteriota	Actinomycetia	Actinomycetales	Actinomycetaceae	Varibaculum
1779	MGYG000000337	Known_MAG	Bacteria	Proteobacteria	Gammaproteobacteria	Enterobacterales	Enterobacteriaceae	Morganella	Morganella morganii_B
1780	MGYG000000338	Known_MAG	Bacteria	Proteobacteria	Gammaproteobacteria	Enterobacterales	Succinivibrionaceae	Anaerobiospirillum	Anaerobiospirillum sp900543125
1781	MGYG000000339	Known_MAG	Bacteria	Firmicutes_A	Clostridia	Oscillospirales	Oscillospiraceae	Enterenecus
1782	MGYG000000342	Known_MAG	Bacteria	Proteobacteria	Gammaproteobacteria	Burkholderiales	Burkholderiaceae	Oxalobacter
1783	MGYG000000343	Known_MAG	Bacteria	Bacteroidota	Bacteroidia	Bacteroidales	Marinifilaceae	Odoribacter	Odoribacter sp900548135
1784	MGYG000000344	Known_MAG	Bacteria	Firmicutes_A	Clostridia	Christensenellales	Borkfalkiaceae	Scatosoma	Scatosoma sp900555925
1785	MGYG000000345	Known_MAG	Bacteria	Verrucomicrobiota	Lentisphaeria	Victivallales	UBA1829	UBA1829	UBA1829 sp002338895
1786	MGYG000000346	Known_MAG	Bacteria	Firmicutes_A	Clostridia	Lachnospirales	Lachnospiraceae	RGIG8607
1787	MGYG000000347	Known_MAG	Bacteria	Firmicutes	Bacilli	ML615J-28	CAG-698	Tener-01	Tener-01 sp001940985
1788	MGYG000000348	Known_MAG	Bacteria	Bacteroidota	Bacteroidia	Bacteroidales	Muribaculaceae	CAG-485	CAG-485 sp905198125
1789	MGYG000000349	Known_MAG	Bacteria	Firmicutes_A	Clostridia	Christensenellales	CAG-917	CAG-1138	CAG-1138 sp000434675
1790	MGYG000000350	Known_MAG	Bacteria	Firmicutes_A	Clostridia	Oscillospirales	CAG-272
1791	MGYG000000351	Known_MAG	Bacteria	Proteobacteria	Gammaproteobacteria	Burkholderiales	Burkholderiaceae	Aphodousia	Aphodousia faecipullorum
1792	MGYG000000352	Known_MAG	Bacteria	Firmicutes_A	Clostridia	Oscillospirales	CAG-272	UBA1740
1793	MGYG000000353	Known_MAG	Bacteria	Bacteroidota	Bacteroidia	Bacteroidales	Muribaculaceae	UBA7173	UBA7173 sp900548705
1794	MGYG000000355	Known_MAG	Bacteria	Bacteroidota	Bacteroidia	Bacteroidales	Tannerellaceae	Parabacteroides	Parabacteroides intestinavium
1795	MGYG000000356	Known_MAG	Bacteria	Firmicutes_A	Clostridia	Lachnospirales	Lachnospiraceae	VUNI01
1796	MGYG000000357	Known_MAG	Bacteria	Bacteroidota	Bacteroidia	Bacteroidales	Muribaculaceae	CAG-873
1797	MGYG000000358	Known_MAG	Bacteria	Elusimicrobiota	Elusimicrobia	Elusimicrobiales	Elusimicrobiaceae	UBA1436	UBA1436 sp002329395
1798	MGYG000000359	Known_MAG	Bacteria	Firmicutes_A	Clostridia	Lachnospirales	Lachnospiraceae	Choladocola	Choladocola sp018223365
1799	MGYG000000360	Known_MAG	Bacteria	Verrucomicrobiota	Lentisphaeria	Victivallales	UBA1829	UBA1829	UBA1829 sp900548385
1800	MGYG000000361	Known_MAG	Bacteria	Firmicutes_A	Clostridia	Lachnospirales	Lachnospiraceae	VSOB01
1801	MGYG000000363	Known_MAG	Bacteria	Cyanobacteria	Vampirovibrionia	Gastranaerophilales	Gastranaerophilaceae	Stercorousia	Stercorousia sp001917115
1802	MGYG000000364	Known_MAG	Bacteria	Firmicutes_A	Clostridia	Lachnospirales	Lachnospiraceae	Coprococcus	Coprococcus sp900767685
1803	MGYG000000365	Known_MAG	Bacteria	Firmicutes_A	Clostridia	TANB77	CAG-508	CAG-269	CAG-269 sp900556695
1804	MGYG000000366	Known_MAG	Bacteria	Firmicutes_A	Clostridia	Oscillospirales	CAG-382	UMGS882	UMGS882 sp900757905
1805	MGYG000000367	Known_MAG	Bacteria	Firmicutes_A	Clostridia	Peptostreptococcales	Anaerovoracaceae	QAKD01	QAKD01 sp003343965
1806	MGYG000000368	Known_MAG	Bacteria	Firmicutes_A	Clostridia	Oscillospirales	Oscillospiraceae	F23-B02	F23-B02 sp004553495
1807	MGYG000000370	Known_MAG	Bacteria	Firmicutes_A	Clostridia	Oscillospirales	Oscillospiraceae	CAG-170	CAG-170 sp900545925
1808	MGYG000000371	Known_MAG	Bacteria	Firmicutes_A	Clostridia	Oscillospirales	CAG-272	CAG-390	CAG-390 sp003523225
1809	MGYG000000373	Known_MAG	Bacteria	Firmicutes_A	Clostridia	UBA1212	UBA1255	Egerieisoma	Egerieisoma faecipullorum
1810	MGYG000000374	Known_MAG	Bacteria	Firmicutes	Bacilli	RFN20	CAG-631	Caccosoma	Caccosoma sp900762575
1811	MGYG000000375	Known_MAG	Bacteria	Firmicutes_A	Clostridia	TANB77	CAG-508	CAG-269
1812	MGYG000000377	Known_MAG	Bacteria	Firmicutes_A	Clostridia	Oscillospirales	Oscillospiraceae	UMGS1766
1813	MGYG000000379	Known_MAG	Bacteria	Firmicutes_A	Clostridia	Oscillospirales	Acutalibacteraceae	Eubacterium_R	Eubacterium_R sp900539425
1814	MGYG000000381	Known_MAG	Bacteria	Firmicutes	Bacilli	RF39	UBA660	CAG-628
1815	MGYG000000382	Known_MAG	Bacteria	Firmicutes_A	Clostridia	TANB77	CAG-508	CAG-269	CAG-269 sp900554175
1816	MGYG000000383	Known_MAG	Bacteria	Firmicutes_A	Clostridia	Oscillospirales	Acutalibacteraceae	UBA737	UBA737 sp017481865
1817	MGYG000000384	Known_MAG	Bacteria	Firmicutes_A	Clostridia	TANB77	CAG-508	Merdicola	Merdicola sp905200315
1818	MGYG000000385	Known_MAG	Bacteria	Cyanobacteria	Vampirovibrionia	Gastranaerophilales	Gastranaerophilaceae	Zag111	Zag111 sp905211505
1819	MGYG000000386	Known_MAG	Bacteria	Firmicutes_A	Clostridia	Oscillospirales	CAG-272	UMGS911
1820	MGYG000000388	Known_MAG	Bacteria	Firmicutes_A	Clostridia	Oscillospirales	Acutalibacteraceae	UMGS1623
1821	MGYG000000389	Known_MAG	Bacteria	Firmicutes_A	Clostridia	Lachnospirales	Lachnospiraceae	Roseburia	Roseburia sp900550935
1822	MGYG000000390	Known_MAG	Bacteria	Firmicutes_A	Clostridia	Oscillospirales	Acutalibacteraceae
1823	MGYG000000391	Known_MAG	Bacteria	Firmicutes_A	Clostridia	Christensenellales	Borkfalkiaceae	UBA11475	UBA11475 sp003538975
1824	MGYG000000392	Known_MAG	Bacteria	Firmicutes_A	Clostridia	Oscillospirales	Acutalibacteraceae	Ruminococcus_E	Ruminococcus_E sp003521625
1825	MGYG000000393	Known_MAG	Bacteria	Bacteroidota	Bacteroidia	Bacteroidales	UBA932	Cryptobacteroides
1826	MGYG000000394	Known_MAG	Bacteria	Proteobacteria	Alphaproteobacteria	RF32	CAG-239
1827	MGYG000000395	Known_MAG	Bacteria	Firmicutes_A	Clostridia	Oscillospirales	Acutalibacteraceae	CAG-217	CAG-217 sp900547275
1828	MGYG000000397	Known_MAG	Bacteria	Actinobacteriota	Coriobacteriia	Coriobacteriales	Coriobacteriaceae	Collinsella
1829	MGYG000000398	Known_MAG	Bacteria	Firmicutes_A	Clostridia	Lachnospirales	Lachnospiraceae	Butyribacter
1830	MGYG000000399	Known_MAG	Bacteria	Firmicutes_A	Clostridia	Christensenellales	Borkfalkiaceae	UBA10281
1831	MGYG000000400	Known_MAG	Bacteria	Bacteroidota	Bacteroidia	Bacteroidales	Muribaculaceae	UBA7173
1832	MGYG000000401	Known_MAG	Bacteria	Firmicutes_A	Clostridia	Christensenellales	UBA1242	Onthoplasma
1833	MGYG000000402	Known_MAG	Bacteria	Firmicutes_A	Clostridia	Oscillospirales	Acutalibacteraceae	Pseudoruminococcus_A	Pseudoruminococcus_A sp902765855
1834	MGYG000000403	Known_MAG	Bacteria	Firmicutes_A	Clostridia	UBA1381	UBA1381	UBA4716
1835	MGYG000000404	Known_MAG	Bacteria	Firmicutes_A	Clostridia	Lachnospirales	Lachnospiraceae	UBA11774	UBA11774 sp003507655
1836	MGYG000000405	Known_MAG	Bacteria	Firmicutes_A	Clostridia	Oscillospirales	CAG-272	CAG-390	CAG-390 sp000437015
1837	MGYG000000406	Known_MAG	Bacteria	Firmicutes_A	Clostridia	Christensenellales	CAG-552	UBA10677	UBA10677 sp003533505
1838	MGYG000000407	Known_MAG	Bacteria	Firmicutes_A	Clostridia	Christensenellales	UBA1242
1839	MGYG000000408	Known_MAG	Bacteria	Cyanobacteria	Vampirovibrionia	Gastranaerophilales	Gastranaerophilaceae
1840	MGYG000000410	Known_MAG	Bacteria	Cyanobacteria	Vampirovibrionia	Gastranaerophilales	Gastranaerophilaceae	Zag111	Zag111 sp002102825
1841	MGYG000000411	Known_MAG	Bacteria	Firmicutes_C	Negativicutes	Veillonellales	Dialisteraceae	Dialister
1842	MGYG000000412	Known_MAG	Bacteria	Proteobacteria	Gammaproteobacteria	Enterobacterales	Succinivibrionaceae	Succinivibrio	Succinivibrio sp000431835
1843	MGYG000000413	Known_MAG	Bacteria	Firmicutes_B	Peptococcia	Peptococcales	Peptococcaceae	UBA7185
1844	MGYG000000414	Known_MAG	Bacteria	Bacteroidota	Bacteroidia	Bacteroidales	Rikenellaceae	Alistipes	Alistipes merdipullorum
1845	MGYG000000415	Known_MAG	Bacteria	Bacteroidota	Bacteroidia	Bacteroidales	UBA11471	UBA11471	UBA11471 sp900547555
1846	MGYG000000416	Known_MAG	Bacteria	Firmicutes_A	Clostridia	Oscillospirales	CAG-272	UMGS1865	UMGS1865 sp900555785
1847	MGYG000000419	Known_MAG	Bacteria	Firmicutes	Bacilli	RF39	UBA660	CAG-710	CAG-710 sp000432595
1848	MGYG000000420	Known_MAG	Bacteria	Firmicutes_A	Clostridia	Lachnospirales	Anaerotignaceae	Metalachnospira	Metalachnospira sp900553995
1849	MGYG000000421	Known_MAG	Bacteria	Firmicutes_A	Clostridia	TANB77	CAG-508	CAG-269
1850	MGYG000000422	Known_MAG	Bacteria	Cyanobacteria	Vampirovibrionia	Gastranaerophilales	Gastranaerophilaceae	Stercorousia
1851	MGYG000000424	Known_MAG	Bacteria	Firmicutes_A	Clostridia	Oscillospirales	Ruminococcaceae	CAG-353	CAG-353 sp900768995
1852	MGYG000000425	Known_MAG	Bacteria	Firmicutes_A	Clostridia	Oscillospirales	Ruminococcaceae	RGIG3102
1853	MGYG000000426	Known_MAG	Bacteria	Firmicutes	Bacilli	RF39	UBA660	UBA5026
1854	MGYG000000427	Known_MAG	Bacteria	Firmicutes	Bacilli	RFN20	CAG-449	CAG-449	CAG-449 sp000432895
1855	MGYG000000428	Known_MAG	Bacteria	Firmicutes_A	Clostridia	Christensenellales	CAG-552	UMGS1795
1856	MGYG000000429	Known_MAG	Bacteria	Firmicutes_A	Clostridia	Christensenellales	Borkfalkiaceae	UBA7597	UBA7597 sp900542935
1857	MGYG000000430	Known_MAG	Bacteria	Firmicutes	Bacilli	RF39	UBA660	CAG-1000	CAG-1000 sp900761555
1858	MGYG000000431	Known_MAG	Bacteria	Firmicutes	Bacilli	RFN20	CAG-288	CAG-288	CAG-288 sp000437395
1859	MGYG000000432	Known_MAG	Bacteria	Firmicutes_A	Clostridia	TANB77	CAG-508	CAG-269
1860	MGYG000000433	Known_MAG	Bacteria	Firmicutes	Bacilli	ML615J-28	CAG-313	UBA1737
1861	MGYG000000434	Known_MAG	Bacteria	Firmicutes	Bacilli	RF39	UBA660	CAG-611	CAG-611 sp900552235
1862	MGYG000000435	Known_MAG	Bacteria	Firmicutes	Bacilli	RFN20	CAG-826	RUG131	RUG131 sp900549975
1863	MGYG000000437	Known_MAG	Bacteria	Bacteroidota	Bacteroidia	Bacteroidales	Rikenellaceae	Alistipes	Alistipes sp001941065
1864	MGYG000000438	Known_MAG	Bacteria	Cyanobacteria	Vampirovibrionia	Gastranaerophilales	Gastranaerophilaceae	Stercorousia	Stercorousia sp000433095
1865	MGYG000000440	Known_MAG	Bacteria	Firmicutes_A	Clostridia	Oscillospirales	CAG-272	UMGS1865
1866	MGYG000000442	Known_MAG	Bacteria	Bacteroidota	Bacteroidia	Bacteroidales	Bacteroidaceae	Phocaeicola_A	Phocaeicola_A sp003489705
1867	MGYG000000443	Known_MAG	Bacteria	Firmicutes_A	Clostridia	Oscillospirales	Acutalibacteraceae	Eubacterium_R
1868	MGYG000000444	Known_MAG	Bacteria	Firmicutes_A	Clostridia	Christensenellales	Borkfalkiaceae	Borkfalkia	Borkfalkia ceftriaxoniphila
1869	MGYG000000445	Known_MAG	Bacteria	Proteobacteria	Alphaproteobacteria	RF32	CAG-239	RUG410
1870	MGYG000000446	Known_MAG	Bacteria	Firmicutes	Bacilli	RF39	UBA660	UMGS1045	UMGS1045 sp900547995
1871	MGYG000000447	Known_MAG	Bacteria	Cyanobacteria	Vampirovibrionia	Gastranaerophilales	Gastranaerophilaceae	Scatousia	Scatousia sp900554385
1872	MGYG000000448	Known_MAG	Bacteria	Bacteroidota	Bacteroidia	Bacteroidales	Muribaculaceae	CAG-873
1873	MGYG000000449	Known_MAG	Bacteria	Firmicutes_A	Clostridia	TANB77	CAG-508	CAG-269	CAG-269 sp000438255
1874	MGYG000000450	Known_MAG	Bacteria	Firmicutes_A	Clostridia	Oscillospirales	Ruminococcaceae	Merdivicinus
1875	MGYG000000454	Known_MAG	Bacteria	Firmicutes_A	Clostridia	Oscillospirales	CAG-272	RUG11130
1876	MGYG000000455	Known_MAG	Bacteria	Firmicutes_A	Clostridia	UBA1212	UBA1255	Egerieisoma
1877	MGYG000000456	Known_MAG	Bacteria	Firmicutes_A	Clostridia	Oscillospirales	Acutalibacteraceae
1878	MGYG000000458	Known_MAG	Bacteria	Firmicutes_A	Clostridia	Christensenellales	CAG-314	CAG-314	CAG-314 sp900551395
1879	MGYG000000459	Known_MAG	Bacteria	Firmicutes_A	Clostridia	Christensenellales	UBA1242	CAJKWP01	CAJKWP01 sp905203645
1880	MGYG000000460	Known_MAG	Bacteria	Firmicutes_A	Clostridia	Christensenellales	CAG-917	CAG-475	CAG-475 sp900550915
1881	MGYG000000461	Known_MAG	Bacteria	Firmicutes_A	Clostridia	Christensenellales	UBA1242	Caccovivens	Caccovivens sp900768545
1882	MGYG000000462	Known_MAG	Bacteria	Bacteroidota	Bacteroidia	Bacteroidales	Rikenellaceae	UBA940	UBA940 sp900768115
1883	MGYG000000463	Known_MAG	Bacteria	Firmicutes_A	Clostridia	Oscillospirales	CAG-272	CAG-841	CAG-841 sp000437375
1884	MGYG000000464	Known_MAG	Bacteria	Cyanobacteria	Vampirovibrionia	Gastranaerophilales	Gastranaerophilaceae	QHMH01	QHMH01 sp003258795
1885	MGYG000000465	Known_MAG	Bacteria	Firmicutes	Bacilli	RF39	UBA660	Onthocola_B
1886	MGYG000000466	Known_MAG	Bacteria	Firmicutes_A	Clostridia	Oscillospirales	Ruminococcaceae	UMGS1668	UMGS1668 sp900553955
1887	MGYG000000467	Known_MAG	Bacteria	Verrucomicrobiota	Lentisphaeria	Victivallales	Victivallaceae	CAAGED01	CAAGED01 sp900768505
1888	MGYG000000468	Known_MAG	Bacteria	Firmicutes_A	Clostridia	Oscillospirales	CAG-272	UMGS1696	UMGS1696 sp900554225
1889	MGYG000000469	Known_MAG	Bacteria	Firmicutes	Bacilli	RF39	UBA660	UBA6414
1890	MGYG000000471	Known_MAG	Bacteria	Firmicutes	Bacilli	RFN20	CAG-288	Enterosoma	Enterosoma sp900770925
1891	MGYG000000472	Known_MAG	Bacteria	Firmicutes_A	Clostridia	Christensenellales	UBA1242	UMGS2069	UMGS2069 sp900554955
1892	MGYG000000473	Known_MAG	Bacteria	Firmicutes_A	Clostridia	Christensenellales	Borkfalkiaceae	UBA10281	UBA10281 sp900767495
1893	MGYG000000474	Known_MAG	Bacteria	Firmicutes_A	Clostridia	Oscillospirales	Oscillospiraceae	Dysosmobacter
1894	MGYG000000476	Known_MAG	Bacteria	Firmicutes_A	Clostridia	Oscillospirales	CAG-382	UMGS882	UMGS882 sp900546385
1895	MGYG000000477	Known_MAG	Bacteria	Firmicutes_A	Clostridia	TANB77	UBA1234	UBA1234	UBA1234 sp900753135
1896	MGYG000000478	Known_MAG	Bacteria	Firmicutes	Bacilli	RFN20	CAG-826	UBA4951	UBA4951 sp900540385
1897	MGYG000000479	Known_MAG	Bacteria	Spirochaetota	Spirochaetia	Treponematales	Treponemataceae	Treponema_D	Treponema_D sp900541995
1898	MGYG000000481	Known_MAG	Bacteria	Firmicutes_A	Clostridia	Oscillospirales	CAG-382	UMGS1387
1899	MGYG000000482	Known_MAG	Bacteria	Firmicutes_A	Clostridia	TANB77	CAG-508	HGM13634	HGM13634 sp900770385
1900	MGYG000000483	Known_MAG	Bacteria	Firmicutes_A	Clostridia	Christensenellales	Borkfalkiaceae	HGM11416	HGM11416 sp900766495
1901	MGYG000000485	Known_MAG	Bacteria	Cyanobacteria	Vampirovibrionia	Gastranaerophilales	Gastranaerophilaceae	Stercorousia	Stercorousia sp900767135
1902	MGYG000000486	Known_MAG	Bacteria	Firmicutes_C	Negativicutes	Acidaminococcales	Acidaminococcaceae	Phascolarctobacterium_A	Phascolarctobacterium_A sp900770955
1903	MGYG000000487	Known_MAG	Bacteria	Firmicutes_A	Clostridia	Oscillospirales	Ruminococcaceae	CAG-115	CAG-115 sp900768125
1904	MGYG000000488	Known_MAG	Bacteria	Firmicutes	Bacilli	Acholeplasmatales	Anaeroplasmataceae	Anaeroplasma	Anaeroplasma sp900767915
1905	MGYG000000491	Known_MAG	Bacteria	Cyanobacteria	Vampirovibrionia	Gastranaerophilales	Gastranaerophilaceae	Zag111	Zag111 sp003258735
1906	MGYG000000492	Known_MAG	Bacteria	Proteobacteria	Alphaproteobacteria	RF32	CAG-239	RUG410	RUG410 sp900553115
1907	MGYG000000493	Known_MAG	Bacteria	Cyanobacteria	Vampirovibrionia	Gastranaerophilales	Gastranaerophilaceae	UBA2883	UBA2883 sp002103075
1908	MGYG000000494	Known_MAG	Bacteria	Firmicutes_A	Clostridia	TANB77	CAG-508	CAG-269
1909	MGYG000000495	Known_MAG	Bacteria	Firmicutes_A	Clostridia	UMGS1883	HGM11501	HGM11501	HGM11501 sp900766735
1910	MGYG000000496	Known_MAG	Bacteria	Firmicutes	Bacilli	RF39	UBA660	CAG-1000	CAG-1000 sp900768345
1911	MGYG000000499	Known_MAG	Bacteria	Firmicutes_A	Clostridia	Christensenellales	Borkfalkiaceae	HGM11416	HGM11416 sp900768525
1912	MGYG000000501	Known_MAG	Bacteria	Firmicutes_A	Clostridia	Lachnospirales	Lachnospiraceae	CAG-127	CAG-127 sp900553925
1913	MGYG000000503	Known_MAG	Bacteria	Cyanobacteria	Vampirovibrionia	Gastranaerophilales	Gastranaerophilaceae	UMGS1585	UMGS1585 sp900766355
1914	MGYG000000505	Known_MAG	Bacteria	Firmicutes_A	Clostridia	Oscillospirales	Acutalibacteraceae
1915	MGYG000000506	Known_MAG	Bacteria	Proteobacteria	Alphaproteobacteria	RF32	CAG-239	RUG410	RUG410 sp900769705
1916	MGYG000000507	Known_MAG	Bacteria	Proteobacteria	Alphaproteobacteria	RF32	CAG-977	UBA2903	UBA2903 sp900768875
1917	MGYG000000509	Known_MAG	Bacteria	Elusimicrobiota	Elusimicrobia	Elusimicrobiales	Elusimicrobiaceae	Avelusimicrobium	Avelusimicrobium sp900762815
1918	MGYG000000510	Known_MAG	Bacteria	Firmicutes_A	Clostridia	Oscillospirales	Ruminococcaceae	UMGS363	UMGS363 sp900541495
1919	MGYG000000511	Known_MAG	Bacteria	Cyanobacteria	Vampirovibrionia	Gastranaerophilales	Gastranaerophilaceae	Stercorousia	Stercorousia sp900556295
1920	MGYG000000512	Known_MAG	Bacteria	Firmicutes_A	Clostridia	Oscillospirales	Ruminococcaceae	Faecalibacterium
1921	MGYG000000513	Known_MAG	Bacteria	Campylobacterota	Campylobacteria	Campylobacterales	Helicobacteraceae	Helicobacter_B	Helicobacter_B fennelliae
1922	MGYG000000514	Known_MAG	Bacteria	Firmicutes_A	Clostridia	Lachnospirales	Lachnospiraceae	CAG-590	CAG-590 sp900769115
1923	MGYG000000515	Known_MAG	Bacteria	Firmicutes_A	Clostridia	Lachnospirales	Lachnospiraceae	UBA2882	UBA2882 sp900549665
1924	MGYG000000517	Known_MAG	Bacteria	Firmicutes_A	Clostridia	Oscillospirales	Ruminococcaceae	UMGS1889	UMGS1889 sp900556055
1925	MGYG000000518	Known_MAG	Bacteria	Firmicutes_A	Clostridia	Oscillospirales	Acutalibacteraceae	UBA737	UBA737 sp900547095
1926	MGYG000000521	Known_MAG	Bacteria	Firmicutes_A	Clostridia	TANB77	CAG-508	CAG-452
1927	MGYG000000523	Known_MAG	Bacteria	Cyanobacteria	Vampirovibrionia	Gastranaerophilales	Gastranaerophilaceae	UBA1221	UBA1221 sp900770525
1928	MGYG000000524	Known_MAG	Bacteria	Firmicutes_A	Clostridia	Christensenellales	Borkfalkiaceae	UBA4636	UBA4636 sp900770945
1929	MGYG000000525	Known_MAG	Bacteria	Proteobacteria	Gammaproteobacteria	Burkholderiales	Burkholderiaceae	Duodenibacillus	Duodenibacillus sp900767875
341	KIJ_genome_15769	Known_MAG	Bacteria	Bacteroidota	Bacteroidia	Bacteroidales	Bacteroidaceae	Prevotella	Prevotella sp002481295
1931	MGYG000000527	Known_MAG	Bacteria	Firmicutes_A	Clostridia	Christensenellales	UBA1242	UMGS1470	UMGS1470 sp900552105
1932	MGYG000000528	Known_MAG	Bacteria	Proteobacteria	Alphaproteobacteria	RF32	CAG-239	CAAFZY01	CAAFZY01 sp900767645
1933	MGYG000000529	Known_MAG	Bacteria	Cyanobacteria	Vampirovibrionia	Gastranaerophilales	Gastranaerophilaceae	UMGS1585	UMGS1585 sp900553205
1934	MGYG000000531	Known_MAG	Bacteria	Actinobacteriota	Coriobacteriia	Coriobacteriales	Coriobacteriaceae	Collinsella	Collinsella sp900768265
1935	MGYG000000532	Known_MAG	Bacteria	Firmicutes_A	Clostridia	Lachnospirales	Lachnospiraceae	CAG-510	CAG-510 sp000434615
1054	KIJ_genome_3264	Known_MAG	Bacteria	Bacteroidota	Bacteroidia	Bacteroidales	Bacteroidaceae	Prevotella	Prevotella sp003447235
1937	MGYG000000535	Known_MAG	Bacteria	Actinobacteriota	Coriobacteriia	Coriobacteriales	Atopobiaceae	Parafannyhessea	Parafannyhessea sp900538935
1938	MGYG000000536	Known_MAG	Bacteria	Fusobacteriota	Fusobacteriia	Fusobacteriales	Fusobacteriaceae	Cetobacterium_A	Cetobacterium_A sp900766645
1939	MGYG000000538	Known_MAG	Bacteria	Verrucomicrobiota	Lentisphaeria	Victivallales	UBA1829	UBA1829	UBA1829 sp900549045
1940	MGYG000000539	Known_MAG	Bacteria	Firmicutes_A	Clostridia	Lachnospirales	Lachnospiraceae	Oribacterium	Oribacterium sp004554245
1941	MGYG000000540	Known_MAG	Bacteria	Firmicutes	Bacilli	RF39	UBA660	CAG-762	CAG-762 sp000432575
1942	MGYG000000542	Known_MAG	Bacteria	Cyanobacteria	Vampirovibrionia	Gastranaerophilales	Gastranaerophilaceae	UBA2883	UBA2883 sp900768915
1943	MGYG000000545	Known_MAG	Bacteria	Firmicutes_A	Clostridia	Lachnospirales	Lachnospiraceae	Mediterraneibacter
1944	MGYG000000546	Known_MAG	Bacteria	Firmicutes_A	Clostridia	Lachnospirales	Lachnospiraceae	Roseburia	Roseburia sp003483745
1945	MGYG000000547	Known_MAG	Bacteria	Firmicutes	Bacilli	Erysipelotrichales	Coprobacillaceae	Catenibacterium
1946	MGYG000000548	Known_MAG	Bacteria	Proteobacteria	Gammaproteobacteria	Burkholderiales	Burkholderiaceae	Sutterella	Sutterella sp900770335
1947	MGYG000000549	Known_MAG	Bacteria	Cyanobacteria	Vampirovibrionia	Gastranaerophilales	Gastranaerophilaceae	Stercorousia	Stercorousia sp001765415
1948	MGYG000000551	Known_MAG	Bacteria	Desulfobacterota_I	Desulfovibrionia	Desulfovibrionales	Desulfovibrionaceae	Mailhella	Mailhella sp900553065
1949	MGYG000000552	Known_MAG	Bacteria	Proteobacteria	Gammaproteobacteria	Burkholderiales	Burkholderiaceae	Aphodousia	Aphodousia sp900554675
1950	MGYG000000554	Known_MAG	Bacteria	Campylobacterota	Campylobacteria	Campylobacterales	Campylobacteraceae	Campylobacter	Campylobacter fetus
1951	MGYG000000555	Known_MAG	Bacteria	Firmicutes_A	Clostridia	Lachnospirales	Cellulosilyticaceae	Cellulosilyticum	Cellulosilyticum sp900556665
1952	MGYG000000557	Known_MAG	Bacteria	Proteobacteria	Gammaproteobacteria	Burkholderiales	Burkholderiaceae	Sutterella
1953	MGYG000000558	Known_MAG	Bacteria	Firmicutes_C	Negativicutes	Veillonellales	Megasphaeraceae	Caecibacter	Caecibacter hominis
1954	MGYG000000559	Known_MAG	Bacteria	Bacteroidota	Bacteroidia	Bacteroidales	Bacteroidaceae	Paraprevotella	Paraprevotella stercorigallinarum
1955	MGYG000000560	Known_MAG	Bacteria	Proteobacteria	Gammaproteobacteria	Burkholderiales	Burkholderiaceae	Sutterella	Sutterella sp905192805
1956	MGYG000000561	Known_MAG	Bacteria	Firmicutes_A	Clostridia	Oscillospirales	Ruminococcaceae	CAG-115	CAG-115 sp003507295
1957	MGYG000000563	Known_MAG	Bacteria	Actinobacteriota	Coriobacteriia	Coriobacteriales	Coriobacteriaceae	Collinsella	Collinsella sp900546105
1958	MGYG000000564	Known_MAG	Bacteria	Proteobacteria	Gammaproteobacteria	Burkholderiales	Burkholderiaceae	Duodenibacillus	Duodenibacillus sp900552915
1959	MGYG000000571	Known_MAG	Bacteria	Actinobacteriota	Actinomycetia	Actinomycetales	Actinomycetaceae	Pauljensenia	Pauljensenia turicensis
1960	MGYG000000572	Known_MAG	Bacteria	Cyanobacteria	Vampirovibrionia	Gastranaerophilales	Gastranaerophilaceae	Stercorousia
1961	MGYG000000573	Known_MAG	Bacteria	Firmicutes_A	Clostridia	Oscillospirales	Ruminococcaceae	Gemmiger	Gemmiger variabilis_A
1962	MGYG000000574	Known_MAG	Bacteria	Firmicutes_A	Clostridia	Lachnospirales	Lachnospiraceae	14-2
1963	MGYG000000576	Known_MAG	Bacteria	Firmicutes	Bacilli	Lactobacillales	Streptococcaceae	Streptococcus	Streptococcus sp015594605
1964	MGYG000000577	Known_MAG	Bacteria	Actinobacteriota	Coriobacteriia	Coriobacteriales	Eggerthellaceae	UMGS1502
1965	MGYG000000578	Known_MAG	Bacteria	Firmicutes_A	Clostridia	Lachnospirales	Lachnospiraceae	Avilachnospira
1966	MGYG000000579	Known_MAG	Bacteria	Actinobacteriota	Coriobacteriia	Coriobacteriales	Coriobacteriaceae	Collinsella
1967	MGYG000000581	Known_MAG	Bacteria	Proteobacteria	Alphaproteobacteria	RF32	CAG-239	CAZU01
1968	MGYG000000583	Known_MAG	Bacteria	Firmicutes_A	Clostridia	Lachnospirales	Lachnospiraceae	Acetatifactor	Acetatifactor sp900766575
1969	MGYG000000584	Known_MAG	Bacteria	Bacteroidota	Bacteroidia	Bacteroidales	UBA932	Cryptobacteroides	Cryptobacteroides sp900544195
1970	MGYG000000585	Known_MAG	Bacteria	Actinobacteriota	Coriobacteriia	Coriobacteriales	UMGS124	UMGS124
1971	MGYG000000586	Known_MAG	Bacteria	Firmicutes_A	Clostridia	Lachnospirales	Lachnospiraceae	Butyribacter
1972	MGYG000000587	Known_MAG	Bacteria	Firmicutes_A	Clostridia	UBA1381	UBA1381	Ornithomonoglobus_A
1973	MGYG000000588	Known_MAG	Bacteria	Firmicutes	Bacilli	ML615J-28	CAG-313	UMGS75
1974	MGYG000000589	Known_MAG	Bacteria	Firmicutes_A	Clostridia	Oscillospirales	Ruminococcaceae	Faecalibacterium
1975	MGYG000000592	Known_MAG	Bacteria	Bacteroidota	Bacteroidia	Bacteroidales	UBA932	Cryptobacteroides
1976	MGYG000000593	Known_MAG	Bacteria	Actinobacteriota	Coriobacteriia	Coriobacteriales	Coriobacteriaceae	Collinsella
1977	MGYG000000595	Known_MAG	Bacteria	Actinobacteriota	Coriobacteriia	Coriobacteriales	Eggerthellaceae	Aphodovivens	Aphodovivens avicola
1978	MGYG000000596	Known_MAG	Bacteria	Verrucomicrobiota	Lentisphaeria	UBA1407	UBA1407	UBA1724	UBA1724 sp900548225
1979	MGYG000000597	Known_MAG	Bacteria	Actinobacteriota	Coriobacteriia	Coriobacteriales	Eggerthellaceae	Senegalimassilia
1980	MGYG000000603	Known_MAG	Bacteria	Actinobacteriota	Coriobacteriia	Coriobacteriales	Eggerthellaceae	UMGS1502	UMGS1502 sp900552365
1981	MGYG000000604	Known_MAG	Bacteria	Verrucomicrobiota	Lentisphaeria	Victivallales	UBA1829	UBA1829	UBA1829 sp900549415
1982	MGYG000000607	Known_MAG	Bacteria	Firmicutes_A	Clostridia	Oscillospirales	Acutalibacteraceae	UMGS1491
1983	MGYG000000608	Known_MAG	Bacteria	Verrucomicrobiota	Lentisphaeria	Victivallales	Victivallaceae	UMGS1518
1984	MGYG000000609	Known_MAG	Bacteria	Firmicutes_A	Clostridia	TANB77	UBA1234	UBA1234
1985	MGYG000000610	Known_MAG	Bacteria	Proteobacteria	Alphaproteobacteria	RF32	CAG-239	CAAFZY01
1986	MGYG000000612	Known_MAG	Bacteria	Firmicutes_C	Negativicutes	Veillonellales	Megasphaeraceae	Megasphaera
1987	MGYG000000613	Known_MAG	Bacteria	Actinobacteriota	Coriobacteriia	Coriobacteriales	UMGS124	UMGS124
1988	MGYG000000614	Known_MAG	Bacteria	Actinobacteriota	Coriobacteriia	Coriobacteriales	Atopobiaceae	Parolsenella	Parolsenella massiliensis
1989	MGYG000000615	Known_MAG	Bacteria	Firmicutes_A	Clostridia	Oscillospirales	CAG-382	UBA1752	UBA1752 sp900554405
1990	MGYG000000616	Known_MAG	Bacteria	Actinobacteriota	Coriobacteriia	Coriobacteriales	Eggerthellaceae	CAG-1427
1991	MGYG000000617	Known_MAG	Bacteria	Proteobacteria	Alphaproteobacteria	RF32	CAG-239	RUG410
1992	MGYG000000618	Known_MAG	Bacteria	Cyanobacteria	Vampirovibrionia	Gastranaerophilales	Gastranaerophilaceae	CAG-196	CAG-196 sp900553895
1993	MGYG000000620	Known_MAG	Bacteria	Actinobacteriota	Coriobacteriia	Coriobacteriales	Atopobiaceae	Parolsenella	Parolsenella uli_B
1994	MGYG000000621	Known_MAG	Bacteria	Firmicutes_A	Clostridia	Lachnospirales	Lachnospiraceae	Acetatifactor
1995	MGYG000000623	Known_MAG	Bacteria	Firmicutes_A	Clostridia	Lachnospirales	Lachnospiraceae	Blautia_A	Blautia_A sp900763175
1996	MGYG000000624	Known_MAG	Bacteria	Proteobacteria	Gammaproteobacteria	Burkholderiales	Burkholderiaceae	Duodenibacillus
1997	MGYG000000625	Known_MAG	Bacteria	Firmicutes_A	Clostridia	Lachnospirales	Lachnospiraceae	CAG-127
1998	MGYG000000626	Known_MAG	Bacteria	Firmicutes_A	Clostridia	Lachnospirales	Lachnospiraceae	W0P33-017
[truncated: 3,357 more rows]

## Sheet: Table 3
Supplementary Table 3: Differential pathway enrichment in known and novel analysis MAGs of HGM13006
Category	Subcategory	ID	Description	GeneRatio	BgRatio	RichFactor	FoldEnrichment	zScore	pvalue	p.adjust	qvalue	geneID	Count	MAGs status
Metabolism	Carbohydrate metabolism	ko00650	Butanoate metabolism	1979-08-01	114/14340	0.0701754	12.7382	9.36504	2.03158e-07	1.60495e-05	1.21895e-05	K00100/K04072/K18369/K01574/K00240/K00248/K18118/K00656	8	Known_MAGs
Metabolism	Global and overview maps	ko01240	Biosynthesis of cofactors	1979-12-01	380/14340	0.0315789	5.73218	6.95838	1.04211e-06	4.11633e-05	3.12632e-05	K06897/K03517/K00878/K00278/K14652/K03147/K01599/K00287/K00767/K00226/K03150/K00794	12	Known_MAGs
Metabolism	Carbohydrate metabolism	ko00620	Pyruvate metabolism	1979-06-01	133/14340	0.0451128	8.18883	6.19913	9.07439e-05	0.00219745	0.00166895	K01026/K00627/K04072/K12972/K18118/K00656	6	Known_MAGs
Metabolism	Glycan biosynthesis and metabolism	ko00541	Biosynthesis of various nucleotide sugars	1979-06-01	138/14340	0.0434783	7.89213	6.05503	0.000111263	0.00219745	0.00166895	K13018/K20429/K13015/K13020/K13019/K15894	6	Known_MAGs
Metabolism	Global and overview maps	ko01250	Biosynthesis of nucleotide sugars	1979-07-01	223/14340	0.0313901	5.69791	5.2624	0.000224488	0.00354692	0.00269386	K13018/K20429/K17716/K13015/K13020/K13019/K15894	7	Known_MAGs
Metabolism	Carbohydrate metabolism	ko00500	Starch and sucrose metabolism	12/129	106/14340	0.113208	12.5845	11.4053	1.7981e-10	1.7981e-08	1.51419e-08	K02760/K01232/K01223/K01182/K05350/K02810/K02759/K01222/K01838/K01176/K01187/K00847	12	Novel_MAGs
Environmental Information Processing	Membrane transport	ko02060	Phosphotransferase system (PTS)	8/129	72/14340	0.111111	12.3514	9.19977	2.54647e-07	1.27324e-05	1.0722e-05	K02757/K02760/K02746/K02794/K02810/K02759/K02747/K02745	8	Novel_MAGs
Metabolism	Carbohydrate metabolism	ko00052	Galactose metabolism	8/129	80/14340	0.1	11.1163	8.64466	5.80744e-07	1.93581e-05	1.63016e-05	K02746/K01182/K01804/K08302/K07407/K02747/K01187/K02745	8	Novel_MAGs
Metabolism	Carbohydrate metabolism	ko00520	Amino sugar and nucleotide sugar metabolism	7/129	116/14340	0.0603448	6.7081	5.88101	8.37505e-05	0.00209376	0.00176317	K02746/K02794/K12373/K01209/K02747/K02745/K00847	7	Novel_MAGs
Metabolism	Glycan biosynthesis and metabolism	ko00550	Peptidoglycan biosynthesis	5/129	55/14340	0.0909091	10.1057	6.4461	0.00013224	0.0026448	0.0022272	K21465/K21466/K12553/K18866/K00687	5	Novel_MAGs

## Sheet: Table 4
Supplementary Table 4: Differential pathway enrichment in known and novel analysis MAGs of Ruminococcus_D
Category	Subcategory	ID	Description	GeneRatio	BgRatio	RichFactor	FoldEnrichment	zScore	pvalue	p.adjust	qvalue	geneID	Count	MAGs status
Metabolism	Glycan biosynthesis and metabolism	ko00541	Biosynthesis of various nucleotide sugars	11/116	138/14340	0.0797101	9.85382	9.43785	1.45886e-08	1.31297e-06	1.0903e-06	K15669/K01790/K03271/K15856/K03273/K00978/K02805/K20429/K00067/K00973/K07031	11	Known_MAGs
Metabolism	Global and overview maps	ko01250	Biosynthesis of nucleotide sugars	12/116	223/14340	0.0538117	6.65223	7.68208	2.46763e-07	1.11043e-05	9.22114e-06	K15669/K01790/K03271/K15856/K03273/K00978/K02805/K20429/K00067/K00973/K07031/K17716	12	Known_MAGs
Metabolism	Carbohydrate metabolism	ko00500	Starch and sucrose metabolism	7/116	106/14340	0.0660377	8.16363	6.68498	2.37883e-05	0.000713649	0.000592621	K02819/K02791/K01226/K02777/K00978/K01182/K00690	7	Known_MAGs
Metabolism	Global and overview maps	ko01240	Biosynthesis of cofactors	11/116	380/14340	0.0289474	3.57849	4.60037	0.000255375	0.00574594	0.00477149	K19221/K02551/K02169/K01919/K19267/K14153/K06897/K00077/K22227/K01077/K01737	11	Known_MAGs
Metabolism	Carbohydrate metabolism	ko00520	Amino sugar and nucleotide sugar metabolism	6/116	116/14340	0.0517241	6.39417	5.26769	0.000354302	0.00637744	0.00529588	K02791/K02777/K00978/K01788/K00973/K17716	6	Known_MAGs
Metabolism	Biosynthesis of other secondary metabolites	ko00521	Streptomycin biosynthesis	3/116	21/14340	0.142857	17.6601	6.89935	0.0006168	0.009252	0.00768295	K01790/K00067/K00973	3	Known_MAGs
Cellular Processes	Cell motility	ko02040	Flagellar assembly	22/64	55/14340	0.4	89.625	44.0904	3.9136e-39	1.80026e-37	1.60664e-37	K13820/K02407/K02557/K02410/K02390/K02388/K02420/K02417/K02401/K02409/K02397/K02387/K02421/K02416/K02392/K02406/K02412/K02396/K02422/K02405/K02419/K02400	22	Novel_MAGs
Cellular Processes	Cell motility	ko02030	Bacterial chemotaxis	4/64	26/14340	0.153846	34.4712	11.4373	5.01017e-06	0.000115234	0.00010284	K02557/K02410/K02417/K02416	4	Novel_MAGs
Metabolism	Metabolism of terpenoids and polyketides	ko01053	Biosynthesis of siderophore group nonribosomal peptides	4/64	36/14340	0.111111	24.8958	9.61149	1.90911e-05	0.000265243	0.000236716	K12240/K02363/K04783/K04784	4	Novel_MAGs
Metabolism	Energy metabolism	ko00920	Sulfur metabolism	6/64	129/14340	0.0465116	10.4215	7.19696	2.30646e-05	0.000265243	0.000236716	K15554/K15553/K15552/K15551/K10831/K15555	6	Novel_MAGs

## Sheet: Table 5
Supplementary Table 5: Taxa summary and abundance of RNA profiles in 66 Orang Asli and 30 Kuala Lumpur individuals
						Timepoint	OA_Pre	OA_Pre	OA_Pre	OA_Pre	OA_Pre	OA_Pre	OA_Pre	OA_Pre	OA_Pre	OA_Pre	OA_Pre	OA_Pre	OA_Pre	OA_Pre	OA_Pre	OA_Pre	OA_Pre	OA_Pre	OA_Pre	OA_Pre	OA_Pre	OA_Pre	OA_Pre	OA_Pre	OA_Pre	OA_Pre	OA_Pre	OA_Pre	OA_Pre	OA_Pre	OA_Pre	OA_Pre	OA_Pre	OA_Pre	OA_Pre	OA_Pre	OA_Pre	OA_Pre	OA_Pre	OA_Pre	OA_Pre	OA_Pre	OA_Pre
Kingdom	Phylum	Class	Order	Family	Genus	Species	LL11A	LL11B	LL12A	LL12C	LL14A	LL16A	LL1A	LL21A	LL22A	LL24B	LL25A	LL25C	LL26A	LL2B	LL2C	LL31A	LL31F	LL31G	LL32A	LL32C	LL33A	LL33B	LL34A	LL41A	LL41B	LL42A	LL46A	LL48A	LL4B	LL4C	LL51E	LL53A	LL54B	LL56A	LL57A	LL5B	LL5D	LL61A	LL61B	LL61D	LL62A	LL62B	LL63A
Bacteria	Firmicutes	Bacilli	RFN20	CAG-288	CAG-568	CAG-568 sp000434395	0	0	0	0	0	0	131	0	247	10	2	0	0	237	263	889	55	0	0	0	327	167	375	11	15	7	0	0	1891	2838	61	0	0	0	0	0	0	0	5	53	0	0	0
Bacteria	Firmicutes_A	Clostridia	Oscillospirales	Acutalibacteraceae	Ruminococcus_E	Ruminococcus_E bromii_B	55	5854	0	1	81	17	1253	11	1236	4210	2	191	170	1291	43703	4818	889	10634	1206	0	6172	834	7195	238	2663	0	0	4028	4	12053	8839	0	1715	10985	0	13991	10752	9425	3348	2270	0	77	13
Bacteria	Bacteroidota	Bacteroidia	Bacteroidales	Bacteroidaceae	Prevotella	Prevotella copri_A	8070	5965	218	4566	26977	11740	1532	21430	15609	3514	25746	1587	6	1731	1582	788	142	6467	60	464	863	2802	3702	2155	262	18149	30711	2865	173	327	324	4189	11624	9994	19454	8009	649	8346	5803	1154	2190	4851	67
Bacteria	Bacteroidota	Bacteroidia	Bacteroidales	Bacteroidaceae	Prevotella	Prevotella copri_A	8738	3433	194	2473	31143	7970	1271	10404	5100	2654	9189	985	2	1208	1833	345	86	4546	49	181	612	2203	2147	2043	140	7069	8919	2019	135	201	208	4302	7242	9451	7108	3847	422	7397	6683	1230	706	3402	87
Bacteria	Firmicutes_A	Clostridia	Lachnospirales	Lachnospiraceae	Agathobacter	Agathobacter faecis	487	2053	29316	6079	4	132	2041	918	7900	6611	1525	9714	526	165	772	99	28	753	11	79	15	18	9382	58	10	836	795	361	3201	19	42	6	1180	11040	13084	19527	32	29	554	580	9598	126	66
Bacteria	Bacteroidota	Bacteroidia	Bacteroidales	UBA932	Cryptobacteroides	Cryptobacteroides sp000433355	1990	0	0	3557	3309	2209	3385	2580	4170	434	65	47	3	17463	21702	9264	2100	2300	4795	21	535	6354	291	6149	3154	1570	213	0	3	38987	1097	19666	1263	2235	3491	20758	5735	21066	8707	13906	553	203	6105
Bacteria	Bacteroidota	Bacteroidia	Bacteroidales	Bacteroidaceae	Alloprevotella	Alloprevotella timonensis	13105	15	21	28118	36842	896	8411	20723	333	7197	40066	100059	3	4065	7819	678	12108	12111	4263	42460	3695	5307	2607	9116	611	5937	86960	36398	7	8827	529	14788	6844	45957	3369	2404	12525	3582	1567	204	15	179368	16660
Bacteria	Bacteroidota	Bacteroidia	Bacteroidales	Bacteroidaceae	Prevotella	Unknown	4079	9242	2501	23693	35546	25197	6339	10381	33590	2098	12199	4105	43	3735	4016	1654	668	6683	184	1317	1000	5843	6305	1816	373	16992	31504	7319	702	606	488	11887	19615	27716	28078	8207	1854	5341	12113	4247	2899	6182	229
Bacteria	Bacteroidota	Bacteroidia	Bacteroidales	Bacteroidaceae	Prevotella	Prevotella sp900551985	3538	1591	160	2062	6085	3362	554	4304	3224	1110	5329	680	2	352	907	246	70	1625	55	165	219	690	1031	778	152	3875	4573	938	102	94	145	1331	3486	3181	3858	1910	595	2625	1608	469	532	1144	46
Bacteria	Bacteroidota	Bacteroidia	Bacteroidales	Bacteroidaceae	Prevotella	Prevotella sp900553155	223	0	1205	179	42	1115	651	17	321	361	2922	5310	0	71	149	8	162	723	7	16	17	32	43	371	48	180	54	103	11	11	59	121	1154	928	188	214	192	92	224	336	24	61	34
Bacteria	Bacteroidota	Bacteroidia	Bacteroidales	Bacteroidaceae	Prevotella	Prevotella sp900544825	2558	2023	168	1808	7654	5286	508	4415	3258	1038	5616	680	5	422	504	278	60	1850	47	134	289	943	999	709	62	3865	7268	1096	77	113	136	2364	3230	3887	5455	1707	169	4124	1798	465	529	1279	46
Bacteria	Bacteroidota	Bacteroidia	Bacteroidales	Bacteroidaceae	Prevotella	Unknown	3292	4762	904	17413	17504	13816	4963	6626	15688	1792	8692	2057	24	2045	1877	755	328	3231	77	903	701	5071	5474	1296	134	10362	15079	3263	352	273	360	6796	14485	22839	14253	4316	716	2455	5331	2562	1353	3913	82
Bacteria	Firmicutes_A	Clostridia	Lachnospirales	Lachnospiraceae	Coprococcus	Coprococcus eutactus_A	279	0	30	25	3624	120	27	2798	4082	3082	16	0	2	0	0	5	36	71	7	0	106	736	193	83	15	2475	1210	1330	35	3	31	9587	61	437	416	144	5321	59	1131	2226	24	192	107
Bacteria	Firmicutes_A	Clostridia	Oscillospirales	Acutalibacteraceae	Fimenecus	Fimenecus sp000432435	2029	96	0	2710	22	699	2015	0	53	3647	1286	0	1	24	54	1	524	0	133	0	22	10	2324	1308	295	0	891	949	0	647	1381	23	6	510	0	62	19	922	0	0	0	0	52
Bacteria	Firmicutes_A	Clostridia	Oscillospirales	Acutalibacteraceae	Ruminococcus_E	Ruminococcus_E sp003526955	9096	0	0	0	0	0	68	0	8	0	8	0	0	0	0	0	0	0	0	0	6	0	15	33	0	405	0	0	0	2	12	0	0	283	0	0	91	7	0	0	0	0	0
Bacteria	Bacteroidota	Bacteroidia	Bacteroidales	Bacteroidaceae	Prevotella	Prevotella sp900765465	5294	3669	145	2025	12169	7718	1192	6215	5318	1196	13294	1627	15	449	536	286	62	3018	79	302	491	1699	2973	1047	90	10411	8559	1359	112	103	226	2312	7459	4937	8727	4925	283	3071	2311	1226	1269	2634	43
Bacteria	Bacteroidota	Bacteroidia	Bacteroidales	Bacteroidaceae	Prevotella	Prevotella stercorea	254	7	57	226	8462	198	100	1175	3507	175	4413	7785	12	64	124	9	121	4245	13	338	54	25	126	3300	576	1695	39	1016	1267	8	70	617	7883	1885	82	187	384	1734	190	179	20	959	8444
Bacteria	Firmicutes_A	Clostridia	Oscillospirales	Ruminococcaceae	Faecalibacterium	Faecalibacterium prausnitzii_F	91	143	528	812	17	64	53	20	56	149	161	142	1	44	141	17	10	69	3	326	208	632	431	55	1	150	42	140	79	17	37	276	144	312	169	98	29	42	11	145	28	93	6
Archaea	Archaea	Archaea	Archaea	Archaea	Archaea	MGYG000002163	308	0	0	2891	0	1	1267	60	128	2545	276	0	1	5480	10984	3470	3089	11550	103	3	4130	2092	35	16264	36027	234	909	0	0	4634	27014	0	389	2837	0	0	5148	10841	3741	12735	560	0	41675
Bacteria	Firmicutes_A	Clostridia	Lachnospirales	Lachnospiraceae	Blautia_A	Blautia_A wexlerae	3154	2248	15141	12256	179	5225	1884	585	490	2044	3653	3537	2161	273	943	2601	732	5386	29	15534	443	4469	7345	488	131	7274	935	11300	1618	97	1511	3886	5090	25749	1833	15653	945	631	171	1433	623	600	46
Bacteria	Firmicutes_A	Clostridia	Oscillospirales	Acutalibacteraceae	Ruminococcus_E	Ruminococcus_E sp003526955	9907	0	23	0	19	3	50	0	7	0	0	0	0	0	11	0	0	0	0	0	0	6	0	37	0	385	0	0	2	0	16	0	27	155	9	14	82	15	0	0	0	0	0
Bacteria	Bacteroidota	Bacteroidia	Bacteroidales	Bacteroidaceae	Prevotella	Prevotella sp000434975	224	57	25	79	1182	392	28	101	399	29	36075	691	363	208	45	180	146	3455	29	73	347	58	1021	4882	468	11354	95	2145	181	8	16	77	1040	181	54	671	2385	118	65	160	251	68	783
Bacteria	Firmicutes_A	Clostridia	Oscillospirales	Ruminococcaceae	Faecalibacterium	Faecalibacterium prausnitzii_D	278	1971	34146	31396	183	163	1587	583	82	525	786	222	43	1661	5293	332	42	511	61	2713	2354	1055	3182	287	10	1012	1775	744	2320	502	129	1919	288	1531	7203	4892	140	499	114	1021	117	325	38
Bacteria	Firmicutes_A	Clostridia	Lachnospirales	Lachnospiraceae	RUG115	RUG115 sp900066395	44	108	152	4292	124	69	80	22	32	24	9	345	1	56	345	7785	8	23	217	20	158	5966	898	4	0	20	60	1275	20	9	63	0	390	82	215	1632	9	135	32	37	0	155	6
Bacteria	Firmicutes_A	Clostridia	Lachnospirales	Lachnospiraceae	Roseburia	Roseburia inulinivorans	177	69	2768	225	78	348	103	32	37	119	4864	75	16	30	273	0	31	190	39	24	0	53	1456	20	21	250	0	13	35	106	0	73	6036	252	16	591	10	2	72	34	145	62	770
Bacteria	Firmicutes_A	Clostridia	Peptostreptococcales	Peptostreptococcaceae	Romboutsia	Romboutsia timonensis	177	91	8	21	0	367	0	605	255	39	2	0	952	52	107	0	0	46	123	121	10	12	75	20	13	219	767	578	838	116	0	10	0	1989	61	82	136	43	11	9	38	0	183
Bacteria	Firmicutes_A	Clostridia	Lachnospirales	Lachnospiraceae	Dorea_A	Dorea_A longicatena	411	201	619	242	8	2641	931	61	44	58	831	102	226	29	204	18	62	314	231	131	351	95	441	59	10	2373	216	500	107	1	652	4250	44	8577	430	1169	9	787	226	3101	500	124	12
Bacteria	Firmicutes_A	Clostridia	Lachnospirales	Lachnospiraceae	Blautia_A	Blautia_A obeum	9052	2449	829	9671	136	6781	1760	166	157	374	12739	1087	3071	123	306	6604	91	6414	99	3848	701	7741	4232	1436	1008	1770	216	3269	6724	132	5476	3342	2652	2681	913	2951	411	4505	1210	1763	547	193	32
Bacteria	Firmicutes_A	Clostridia	Oscillospirales	Oscillospiraceae	CAG-83	CAG-83 sp000435975	495	2816	3	57	840	9	11	0	89	76	34	0	5	1197	1056	730	12	639	1145	0	1728	57	37	1802	872	91	171	0	8376	451	231	3603	27	27	12	38	380	2005	542	493	88	0	3960
Bacteria	Firmicutes_A	Clostridia	Oscillospirales	Acutalibacteraceae	Ruminococcus_E	Ruminococcus_E sp003526955	4203	0	0	0	0	0	36	0	0	0	0	0	0	0	0	0	0	0	0	0	0	0	97	14	0	183	0	0	0	0	19	0	0	56	0	428	21	0	0	0	0	0	20
Bacteria	Firmicutes_A	Clostridia	Lachnospirales	Lachnospiraceae	Agathobacter	Agathobacter rectalis	460	0	78	0	23	6	0	0	24	0	59	0	0	0	0	30	0	0	0	0	17	18	305	27	3	249	60	0	23	60	0	38	140	34	652	65	13	26	0	0	0	0	0
Bacteria	Bacteroidota	Bacteroidia	Bacteroidales	Bacteroidaceae	Prevotella	Prevotella sp900767615	3962	4549	238	2627	12104	15176	3848	8526	2346	732	37233	5093	4	303	854	326	115	3541	54	833	401	650	2676	1487	65	8690	4755	1110	310	90	148	4602	15225	3671	9111	5153	479	1987	1398	399	5522	2684	49
Bacteria	Firmicutes_A	Clostridia	Clostridiales	Clostridiaceae	Clostridium	Clostridium sp000435835	1015	0	0	57	101	6	10	15	14	0	1	4	0	27	16	0	0	125	14	18	25	9	186	14	1439	511	900	1361	90	424	71	11	0	479	5	13	200	496	107	309	0	0	785
Bacteria	Firmicutes_A	Clostridia	Lachnospirales	Lachnospiraceae	Agathobacter	Agathobacter rectalis	1339	31	120	9	14	18	29	43	15	0	59	33	7	13	0	19	0	22	0	163	25	65	604	0	3	126	47	0	50	10	13	824	395	188	1041	64	31	19	0	0	0	0	6
Bacteria	Firmicutes_A	Clostridia	Oscillospirales	Acutalibacteraceae	CAG-177	CAG-177 sp003514385	32	0	2058	36	0	1	36	940	162	60	185	0	2	1688	481	414	0	0	72	0	46	10	253	291	817	145	93	0	14	98	99	2683	17	0	0	3765	20	80	18	83	40	0	79
Bacteria	Firmicutes	Bacilli	Lactobacillales	Lactobacillaceae	Ligilactobacillus	Ligilactobacillus ruminis	6	0	931	0	69	9	374	0	20660	2230	85	8	169	257	527	0	0	6812	3	0	301031	0	1467	3	2	4	516	0	9143	25	453	8574	384	558	44401	809	0	1426	2	0	1950	107	3
Bacteria	Firmicutes_A	Clostridia	Lachnospirales	Lachnospiraceae	Fusicatenibacter	Fusicatenibacter saccharivorans	849	1984	4796	252	71	192	519	213	113	207	1059	334	181	64	1618	0	17	788	26	2402	316	2537	2123	1258	33	307	323	312	212	75	460	115	360	724	592	5	278	416	480	601	176	31	9
Bacteria	Firmicutes_A	Clostridia	Lachnospirales	Lachnospiraceae	Lachnospira	Lachnospira rogosae_A	0	13	234	385	8	27	31	66	58	11	48	0	5	42	0	38	10	37	6	94	41	15	356	55	11	57	149	0	0	35	0	0	56	2	1	238	10	0	36	5	62	0	196
Bacteria	Firmicutes_A	Clostridia	Lachnospirales	Lachnospiraceae	KLE1615	KLE1615 sp900066985	79	364	745	4	244	32	303	168	54	283	58	127	25	193	450	0	289	173	27	2445	24	59	43	46	24	86	68	50	105	45	26	148	105	215	65	9	88	32	266	210	159	75	26
Bacteria	Bacteroidota	Bacteroidia	Bacteroidales	Bacteroidaceae	Prevotella	Prevotella sp900543975	4953	9	13	7717	34	3255	9	148	2384	2456	9808	1090	3	223	1762	179	160	794	0	666	583	706	144	1262	38	3130	564	921	5	199	627	2744	1160	6409	545	1197	2909	405	3607	3516	558	1639	33
Bacteria	Bacteroidota	Bacteroidia	Bacteroidales	Bacteroidaceae	Prevotella	Prevotella sp000434975	76	0	23	67	869	96	32	90	230	18	22189	350	0	159	92	117	8	2228	14	13	217	5	563	2574	492	6295	41	1150	51	11	23	172	751	105	22	622	1109	110	46	31	26	34	580
Bacteria	Firmicutes_A	Clostridia	Oscillospirales	Ruminococcaceae	Faecalibacterium	Faecalibacterium sp900539945	380	2457	4946	5925	129	1423	479	90	407	1135	2682	3068	45	87	923	3150	19	1000	25	9402	5914	23296	9612	1091	54	6847	299	2972	1042	48	91	2707	939	5196	2081	1669	315	566	224	2441	335	430	17
Bacteria	Firmicutes_A	Clostridia	Lachnospirales	Lachnospiraceae	Anaerobutyricum	Anaerobutyricum hallii	285	1347	3125	4367	17	2941	223	409	4974	830	409	805	381	574	206	158	173	1343	13	111	1545	991	1233	128	55	490	84	1892	907	155	1310	974	265	738	515	131	141	2844	447	682	590	126	10
Bacteria	Bacteroidota	Bacteroidia	Bacteroidales	Bacteroidaceae	Prevotella	Prevotella copri	2572	7021	16098	19755	23566	22702	6630	8000	26119	1545	8633	3658	21	3105	2946	957	559	4007	90	1049	729	6089	7546	1389	246	16097	23686	4814	616	516	583	13936	18974	28999	22711	7140	1059	1380	7384	3924	2223	4156	107
Bacteria	Firmicutes_A	Clostridia	Lachnospirales	Lachnospiraceae	Oliverpabstia	Oliverpabstia intestinalis	755	259	262	16	93	55	177	56	158	410	539	490	18	20	317	134	324	5660	50	2347	137	2715	2511	44	15	1014	157	3282	201	3	162	538	939	3558	154	14	13	135	334	719	257	42	13
[truncated: 6,538 more rows]
[truncated: 53 more columns]

## Sheet: Table 6
Supplementary Table 6: Taxa summary and abundance of DNA profiles from 620 Orang Asli and 30 Kuala Lumpur residents
[truncated: 6,866 more rows]
[truncated: 607 more columns]

[truncated: 12 more sheets: Table 7, Table 8, Table 9, Table 10, Table 11, Table 12, Table 13, Table 14, Table 15, Table 16, Table 17, Table 18]
